# Supplementary material for: A Comparative Analysis on the Structure and Function of the Panax notoginseng Rhizosphere Microbiome
Source: Front Microbiol. 2021 Jun 9;12:673512. doi: 10.3389/fmicb.2021.673512 (PMC8219928; doi:10.3389/fmicb.2021.673512)
Supplement: Supplementary file 2 [file Data_Sheet_1.xlsx]

## Sheet: Supplementary Table 1
Habitat	Group	Sample ID	Location	Longitude	Latitude	Altitude	Metagenomic sequencing	Phenotype	Sampling time
Grove	WSLX	WSLZ001	Luozhang Village, Yanshan County, Wenshan City	E 104°35′50″	N 23°38′8″	1745 m	√	Triennial	2018.06.26
		WSLZ002	Luozhang Village, Yanshan County, Wenshan City	E 104°35′50″	N 23°38′8″	1745 m	√
		WSLZ003	Luozhang Village, Yanshan County, Wenshan City	E 104°35′50″	N 23°38′8″	1745 m	√
		WSLZ004	Luozhang Village, Yanshan County, Wenshan City	E 104°35′50″	N 23°38′8″	1745 m	√
		WSLZ005	Luozhang Village, Yanshan County, Wenshan City	E 104°35′50″	N 23°38′8″	1745 m	√
		WSLZ006	Luozhang Village, Yanshan County, Wenshan City	E 104°35′50″	N 23°38′8″	1745 m	√
		WSLZ007	Luozhang Village, Yanshan County, Wenshan City	E 104°35′50″	N 23°38′8″	1745 m	√
		WSLZ008	Luozhang Village, Yanshan County, Wenshan City	E 104°35′50″	N 23°38′8″	1745 m	√
		WSLZ012	Luozhang Village, Yanshan County, Wenshan City	E 104°35′50″	N 23°38′8″	1745 m	√
		WSLZ013	Luozhang Village, Yanshan County, Wenshan City	E 104°35′50″	N 23°38′8″	1745 m	√
		WSLZ014	Luozhang Village, Yanshan County, Wenshan City	E 104°35′50″	N 23°38′8″	1745 m	√
		WSLZ015	Luozhang Village, Yanshan County, Wenshan City	E 104°35′50″	N 23°38′8″	1745 m	√
		WSLZ016	Luozhang Village, Yanshan County, Wenshan City	E 104°35′50″	N 23°38′8″	1745 m	√
		WSLZ017	Luozhang Village, Yanshan County, Wenshan City	E 104°35′50″	N 23°38′8″	1745 m	√
		WSLZ018	Luozhang Village, Yanshan County, Wenshan City	E 104°35′50″	N 23°38′8″	1745 m	√
		WSLZ019	Luozhang Village, Yanshan County, Wenshan City	E 104°35′50″	N 23°38′8″	1745 m	√
		WSLZ020	Luozhang Village, Yanshan County, Wenshan City	E 104°35′50″	N 23°38′8″	1745 m	√
		WSLZ021	Luozhang Village, Yanshan County, Wenshan City	E 104°35′50″	N 23°38′8″	1745 m	√
		WSLZ022	Luozhang Village, Yanshan County, Wenshan City	E 104°35′50″	N 23°38′8″	1745 m	√
		WSLZ023	Luozhang Village, Yanshan County, Wenshan City	E 104°35′50″	N 23°38′8″	1745 m	√
		WSLZ025	Luozhang Village, Yanshan County, Wenshan City	E 104°35′50″	N 23°38′8″	1745 m	√
		WSLZ026	Luozhang Village, Yanshan County, Wenshan City	E 104°35′50″	N 23°38′8″	1745 m	√
		WSLZ027	Luozhang Village, Yanshan County, Wenshan City	E 104°35′50″	N 23°38′8″	1745 m	√
		WSLZ029	Luozhang Village, Yanshan County, Wenshan City	E 104°35′50″	N 23°38′8″	1745 m	√
		WSLZ030	Luozhang Village, Yanshan County, Wenshan City	E 104°35′50″	N 23°38′8″	1745 m	√
		WSLZ101	Luozhang Village, Yanshan County, Wenshan City	E 104°35′50″	N 23°38′8″	1745 m	√
Farm	WSDT	WSDTE01	Panlong Village, Yanshan County, Wenshan City	E 104°19′27″	N 23°32′21″	1770 m	√
		WSDTE02	Panlong Village, Yanshan County, Wenshan City	E 104°19′27″	N 23°32′21″	1770 m	√
		WSDTE03	Panlong Village, Yanshan County, Wenshan City	E 104°19′27″	N 23°32′21″	1770 m	√
		WSDTE04	Panlong Village, Yanshan County, Wenshan City	E 104°19′27″	N 23°32′21″	1770 m	√
		WSDTS01	Panlong Village, Yanshan County, Wenshan City	E 104°19′27″	N 23°32′21″	1770 m	√
		WSDTS03	Panlong Village, Yanshan County, Wenshan City	E 104°19′27″	N 23°32′21″	1770 m	√
		WSDTS05	Panlong Village, Yanshan County, Wenshan City	E 104°19′27″	N 23°32′21″	1770 m	√
		WSDTS06	Panlong Village, Yanshan County, Wenshan City	E 104°19′27″	N 23°32′21″	1770 m	√
		WSDTS07	Panlong Village, Yanshan County, Wenshan City	E 104°19′27″	N 23°32′21″	1770 m	√
		WSDTS08	Panlong Village, Yanshan County, Wenshan City	E 104°19′27″	N 23°32′21″	1770 m	√
		WSDTS09	Panlong Village, Yanshan County, Wenshan City	E 104°19′27″	N 23°32′21″	1770 m	√
		WSDTS10	Panlong Village, Yanshan County, Wenshan City	E 104°19′27″	N 23°32′21″	1770 m	√
		WSDTB01	Panlong Village, Yanshan County, Wenshan City	E 104°19′27″	N 23°32′21″	1770 m	√
		WSDTB04	Panlong Village, Yanshan County, Wenshan City	E 104°19′27″	N 23°32′21″	1770 m	√
		WSDTB05	Panlong Village, Yanshan County, Wenshan City	E 104°19′27″	N 23°32′21″	1770 m	√
		WSDTB07	Panlong Village, Yanshan County, Wenshan City	E 104°19′27″	N 23°32′21″	1770 m	√
		WSDTD01	Panlong Village, Yanshan County, Wenshan City	E 104°19′27″	N 23°32′21″	1770 m	√
		WSDTD02	Panlong Village, Yanshan County, Wenshan City	E 104°19′27″	N 23°32′21″	1770 m	√
		WSDTD03A	Panlong Village, Yanshan County, Wenshan City	E 104°19′27″	N 23°32′21″	1770 m	√
		WSDTD03B	Panlong Village, Yanshan County, Wenshan City	E 104°19′27″	N 23°32′21″	1770 m	√
		WSDTD04	Panlong Village, Yanshan County, Wenshan City	E 104°19′27″	N 23°32′21″	1770 m	√
		WSDTC01	Panlong Village, Yanshan County, Wenshan City	E 104°19′27″	N 23°32′21″	1770 m	√
		WSDTC02	Panlong Village, Yanshan County, Wenshan City	E 104°19′27″	N 23°32′21″	1770 m	√
		WSDTA01	Panlong Village, Yanshan County, Wenshan City	E 104°19′27″	N 23°32′21″	1770 m	√
		WSDTA02	Panlong Village, Yanshan County, Wenshan City	E 104°19′27″	N 23°32′21″	1770 m	√
Grove Control	WSLXCK	WSLZCK-1	Luozhang Village, Yanshan County, Wenshan City	E 104°35′50″	N 23°32′21″	1745 m	√
		WSLZCK-2	Luozhang Village, Yanshan County, Wenshan City	E 104°35′50″	N 23°32′21″	1745 m	√
		WSLZCK-3	Luozhang Village, Yanshan County, Wenshan City	E 104°35′50″	N 23°32′21″	1745 m	√
Farm Control	WSDTCK	WSDTCK-1	Panlong Village, Yanshan County, Wenshan City	E 104°19′27″	N 23°38′8″	1745 m	√
		WSDTCK-2	Panlong Village, Yanshan County, Wenshan City	E 104°19′27″	N 23°38′8″	1745 m	√
		WSDTCK-3	Panlong Village, Yanshan County, Wenshan City	E 104°19′27″	N 23°38′8″	1745 m	√
Grove	BSLX	1Y01	Pingda Village, Napo County, Baise City	E 105°51′17″	N 23°19′39″	923 m	√	Annual
		1Y02	Pingda Village, Napo County, Baise City	E 105°51′17″	N 23°19′39″	923 m	√
		1Y03	Pingda Village, Napo County, Baise City	E 105°51′17″	N 23°19′39″	923 m	√
		3Y01	Pingda Village, Napo County, Baise City	E 105°51′17″	N 23°19′39″	923 m	√	Triennial
		3Y02	Pingda Village, Napo County, Baise City	E 105°51′17″	N 23°19′39″	923 m	√
		3Y03	Pingda Village, Napo County, Baise City	E 105°51′17″	N 23°19′39″	923 m	√
		4Y01	Pingda Village, Napo County, Baise City	E 105°51′17″	N 23°19′39″	923 m	√	Four-year
		4Y02	Pingda Village, Napo County, Baise City	E 105°51′17″	N 23°19′39″	923 m	√
		4Y03	Pingda Village, Napo County, Baise City	E 105°51′17″	N 23°19′39″	923 m	√
		5Y01	Pingda Village, Napo County, Baise City	E 105°51′17″	N 23°19′39″	923 m	√	Five-year
		5Y02	Pingda Village, Napo County, Baise City	E 105°51′17″	N 23°19′39″	923 m	√
		5Y03	Pingda Village, Napo County, Baise City	E 105°51′17″	N 23°19′39″	923 m	√
		5Y04	Pingda Village, Napo County, Baise City	E 105°51′17″	N 23°19′39″	923 m	√
		1L01	Pingda Village, Napo County, Baise City	E 105°51′17″	N 23°19′39″	923 m	√	Biennial, one leaf
		1L02	Pingda Village, Napo County, Baise City	E 105°51′17″	N 23°19′39″	923 m	√
		1L03	Pingda Village, Napo County, Baise City	E 105°51′17″	N 23°19′39″	923 m	√
		1L04	Pingda Village, Napo County, Baise City	E 105°51′17″	N 23°19′39″	923 m	√
		1L05	Pingda Village, Napo County, Baise City	E 105°51′17″	N 23°19′39″	923 m	√
		1L06	Pingda Village, Napo County, Baise City	E 105°51′17″	N 23°19′39″	923 m	√
		1L07	Pingda Village, Napo County, Baise City	E 105°51′17″	N 23°19′39″	923 m	√
		1L08	Pingda Village, Napo County, Baise City	E 105°51′17″	N 23°19′39″	923 m	√
		2L01B	Pingda Village, Napo County, Baise City	E 105°51′17″	N 23°19′39″	923 m	√	Biennial, two leaves
		2L01	Pingda Village, Napo County, Baise City	E 105°51′17″	N 23°19′39″	923 m	√
		2L03	Pingda Village, Napo County, Baise City	E 105°51′17″	N 23°19′39″	923 m	√
		3L01	Pingda Village, Napo County, Baise City	E 105°51′17″	N 23°19′39″	923 m	√	Biennial, three leaves
		3L02	Pingda Village, Napo County, Baise City	E 105°51′17″	N 23°19′39″	923 m	√
		3L03	Pingda Village, Napo County, Baise City	E 105°51′17″	N 23°19′39″	923 m	√
		3L04	Pingda Village, Napo County, Baise City	E 105°51′17″	N 23°19′39″	923 m	√
		3L05	Pingda Village, Napo County, Baise City	E 105°51′17″	N 23°19′39″	923 m	√
		4L01	Pingda Village, Napo County, Baise City	E 105°51′17″	N 23°19′39″	923 m	√	Biennial, four leaves
		4L02	Pingda Village, Napo County, Baise City	E 105°51′17″	N 23°19′39″	923 m	√
		4L03	Pingda Village, Napo County, Baise City	E 105°51′17″	N 23°19′39″	923 m	√
		4L04	Pingda Village, Napo County, Baise City	E 105°51′17″	N 23°19′39″	923 m	√
		4L05	Pingda Village, Napo County, Baise City	E 105°51′17″	N 23°19′39″	923 m	√
		4L06	Pingda Village, Napo County, Baise City	E 105°51′17″	N 23°19′39″	923 m	√
		D01	Pingda Village, Napo County, Baise City	E 105°51′17″	N 23°19′39″	923 m	√	Homophyletic, double stem
		D02	Pingda Village, Napo County, Baise City	E 105°51′17″	N 23°19′39″	923 m	√
		D03	Pingda Village, Napo County, Baise City	E 105°51′17″	N 23°19′39″	923 m	√
		D04	Pingda Village, Napo County, Baise City	E 105°51′17″	N 23°19′39″	923 m	√
		D05	Pingda Village, Napo County, Baise City	E 105°51′17″	N 23°19′39″	923 m	√
		S01	Pingda Village, Napo County, Baise City	E 105°51′17″	N 23°19′39″	923 m	√	Heterophyllous
		S02	Pingda Village, Napo County, Baise City	E 105°51′17″	N 23°19′39″	923 m	√
		S03	Pingda Village, Napo County, Baise City	E 105°51′17″	N 23°19′39″	923 m	√
		S04	Pingda Village, Napo County, Baise City	E 105°51′17″	N 23°19′39″	923 m	√
Farm	BSDT	A01	Tuanjie Village, Napo County, Baise City	E 105°52′52″	N 23°18′46″	892 m	√	Normal
		A02	Tuanjie Village, Napo County, Baise City	E 105°52′52″	N 23°18′46″	892 m	√
		A03	Tuanjie Village, Napo County, Baise City	E 105°52′52″	N 23°18′46″	892 m	√
		A04	Tuanjie Village, Napo County, Baise City	E 105°52′52″	N 23°18′46″	892 m	√
		A05	Tuanjie Village, Napo County, Baise City	E 105°52′52″	N 23°18′46″	892 m	√
		A06	Tuanjie Village, Napo County, Baise City	E 105°52′52″	N 23°18′46″	892 m	√
		A07	Tuanjie Village, Napo County, Baise City	E 105°52′52″	N 23°18′46″	892 m	√
		A08	Tuanjie Village, Napo County, Baise City	E 105°52′52″	N 23°18′46″	892 m	√
		A09	Tuanjie Village, Napo County, Baise City	E 105°52′52″	N 23°18′46″	892 m	√
		A10	Tuanjie Village, Napo County, Baise City	E 105°52′52″	N 23°18′46″	892 m	√
		A11	Tuanjie Village, Napo County, Baise City	E 105°52′52″	N 23°18′46″	892 m	√
		A12	Tuanjie Village, Napo County, Baise City	E 105°52′52″	N 23°18′46″	892 m	√
		A13	Tuanjie Village, Napo County, Baise City	E 105°52′52″	N 23°18′46″	892 m	√
		A15	Tuanjie Village, Napo County, Baise City	E 105°52′52″	N 23°18′46″	892 m	√
		A16	Tuanjie Village, Napo County, Baise City	E 105°52′52″	N 23°18′46″	892 m	√
		A17	Tuanjie Village, Napo County, Baise City	E 105°52′52″	N 23°18′46″	892 m	√
		B01	Tuanjie Village, Napo County, Baise City	E 105°52′52″	N 23°18′46″	892 m	√	Suscept
		B02	Tuanjie Village, Napo County, Baise City	E 105°52′52″	N 23°18′46″	892 m	√
		B03	Tuanjie Village, Napo County, Baise City	E 105°52′52″	N 23°18′46″	892 m	√
		B04	Tuanjie Village, Napo County, Baise City	E 105°52′52″	N 23°18′46″	892 m	√
		B05	Tuanjie Village, Napo County, Baise City	E 105°52′52″	N 23°18′46″	892 m	√
		B06	Tuanjie Village, Napo County, Baise City	E 105°52′52″	N 23°18′46″	892 m	√
		B08	Tuanjie Village, Napo County, Baise City	E 105°52′52″	N 23°18′46″	892 m	√
		B09	Tuanjie Village, Napo County, Baise City	E 105°52′52″	N 23°18′46″	892 m	√
		B10	Tuanjie Village, Napo County, Baise City	E 105°52′52″	N 23°18′46″	892 m	√
		B11	Tuanjie Village, Napo County, Baise City	E 105°52′52″	N 23°18′46″	892 m	√
		B12	Tuanjie Village, Napo County, Baise City	E 105°52′52″	N 23°18′46″	892 m	√
Grove Control	BSLXCK	CK-1	Pingda Village, Napo County, Baise City	E 105°51′17″	N 23°19′39″	923 m	√	Triennial
		CK-2	Pingda Village, Napo County, Baise City	E 105°51′17″	N 23°19′39″	923 m	√
		CK	Pingda Village, Napo County, Baise City	E 105°51′17″	N 23°19′39″	923 m	√
Farm Control	BSDTCK	NPTJCK-1	Tuanjie Village, Napo County, Baise City	E 105°52′52″	N 23°18′46″	892 m	√
		NPTJCK-2	Tuanjie Village, Napo County, Baise City	E 105°52′52″	N 23°18′46″	892 m	√
		NPTJCK-3	Tuanjie Village, Napo County, Baise City	E 105°52′52″	N 23°18′46″	892 m	√
		NPTJCK-4	Tuanjie Village, Napo County, Baise City	E 105°52′52″	N 23°18′46″	892 m	√

## Sheet: Supplementary Table 2
Location	Sample	Clean reads	Remove Host reads	Overall notoginseng mapping rate	NO. of contig	total length (bp)	Max(bp)	Average(bp)	N50	Predict the number of genes	Remove the number of genes below 100nt	Remove the total number of genes below 100nt	Number of non-redundant genes	Number of NR notes	NR annotation rate	Number of KEGG notes	KEGG annotation rate
WSDT	WSDTA01	79313950	79286900	0.00034105	25521938	18275634945	404865	716	773	38617342	34104696	193456374	164264054	102438179	0.623619	58362477	0.355297
	WSDTA02	59289418	58233200	0.0178146
	WSDTB01	64059742	63576176	0.00754867
	WSDTB04	70580042	65965100	0.0653859
	WSDTB05	65324534	57552752	0.118972
	WSDTB07	60831714	58610428	0.0365153
	WSDTC01	57450172	52249668	0.090522
	WSDTC02	55455980	42834954	0.227586
	WSDTD01	74971708	74268932	0.00937388
	WSDTD02	61267356	60592988	0.011007
	WSDTD03A	56182332	52026218	0.0739755
	WSDTD03B	43792592	32381570	0.26057
	WSDTD04	46668950	29572084	0.366343
	WSDTE01	57612150	53203456	0.0765237
	WSDTE02	52189514	49941000	0.0430836
	WSDTE03	61485614	59694878	0.0291245
	WSDTE04	54885440	53344748	0.0280711
	WSDTS01	54495888	51152048	0.0613595
	WSDTS03	68846992	68201992	0.0093686
	WSDTS05	76980726	54676156	0.289742
	WSDTS06	58514974	54676644	0.0655957
	WSDTS07	61606946	49748076	0.192492
	WSDTS08	69778782	61998212	0.111503
	WSDTS09	67788320	40053314	0.409141
	WSDTS10	78602782	65396612	0.168011
WSLX	WSLZ001	66917376	64603320	0.0345808	26923285	20003252193	1010816	743	828	40687420	35952231
	WSLZ002	53757924	52593820	0.0216546
	WSLZ003	65223108	65220314	4.28376e-05
	WSLZ004	53910130	53721850	0.00349248
	WSLZ005	62400400	62398522	3.0096e-05
	WSLZ006	54520918	53478952	0.0191113
	WSLZ007	58612662	58086072	0.00898424
	WSLZ008	65179606	62629318	0.0391271
	WSLZ012	54584556	54526496	0.00106367
	WSLZ013	61612980	61216060	0.00644215
	WSLZ014	54860602	53187678	0.0304941
	WSLZ015	62648274	62602940	0.000723627
	WSLZ016	62420554	62280664	0.00224109
	WSLZ017	74859622	74772098	0.00116918
	WSLZ018	55755532	52792020	0.0531519
	WSLZ019	56051936	53912082	0.0381763
	WSLZ020	61698280	59393038	0.0373631
	WSLZ021	58630044	58043230	0.0100088
	WSLZ022	54935220	54168540	0.0139561
	WSLZ023	61083784	59501392	0.0259053
	WSLZ025	54548464	52394722	0.0394831
	WSLZ026	69549604	66633786	0.0419243
	WSLZ027	82842796	79896642	0.0355632
	WSLZ029	57123010	49567832	0.132262
	WSLZ030	82287096	80365412	0.0233534
	WSLZ101	74215298	71744976	0.0332859
BSDT	A01	57302240	56169948	0.01976	34074948	23288318274	523868	683	720	50248635	44345343
	A02	59094068	58802888	0.0049274
	A03	43714434	42711500	0.0229429
	A04	62735558	57219420	0.0879268
	A05	53164070	35554672	0.331227
	A06	66032808	64416550	0.0244766
	A07	62545084	62265796	0.00446539
	A08	51614600	49933724	0.0325659
	A09	52275220	52104398	0.00326774
	A10	48088854	47754890	0.00694473
	A11	68294036	68118268	0.00257369
	A12	79493764	76904190	0.0325758
	A13	71704686	68442452	0.0454954
	A15	61659370	60004154	0.0268445
	A16	55677990	54907870	0.0138317
	A17	56119788	54923514	0.0213164
	B01	69640682	68990544	0.00933561
	B02	53861632	52871766	0.0183779
	B03	62239960	60930816	0.0210338
	B04	57044920	56816606	0.00400235
	B05	62301584	57833596	0.0717155
	B06	62772014	62335404	0.00695549
	B08	52567074	52560544	0.000124222
	B09	53462598	52769864	0.0129574
	B10	49624420	49370984	0.00510708
	B11	49493338	47689150	0.0364531
	B12	72820492	72542676	0.00381508
BSLX	1L01	54735522	54685360	0.000916443	45229007	31684189194	1086069	701	758	65494875	57725269
	1L02	52102834	52096292	0.000125559
	1L03	72336278	72325390	0.000150519
	1L04	54202804	53876702	0.00601633
	1L05	60927966	60098288	0.0136174
	1L06	48374188	48356732	0.000360854
	1L07	45162268	45142650	0.000434389
	1L08	60068306	59858080	0.00349978
	1Y01	57647070	56569744	0.0186883
	1Y02	64261142	63984376	0.0043069
	1Y03	53074364	53055804	0.000349698
	2L01	62204910	28868304	0.535916
	2L01B	77216350	76981826	0.00303723
	2L03	48805402	48782302	0.000473308
	3L01	55307922	52823478	0.0449202
	3L02	47132020	47068322	0.00135148
	3L03	49853228	48797420	0.0211783
	3L04	70138064	69001090	0.0162105
	3L05	60481892	60115302	0.00606115
	3Y01	49481298	49114648	0.00740987
	3Y02	44825988	44555180	0.00604132
	3Y03	49469510	48752126	0.0145015
	4L01	46728192	45093022	0.0349932
	4L02	53796480	53178972	0.0114786
	4L03	65855364	65572492	0.00429535
	4L04	75997902	75992570	7.01598e-05
	4L05	45084612	44714012	0.0082201
	4L06	47434144	46452200	0.0207012
	4Y01	58260134	51959886	0.10814
	4Y02	54923356	54434916	0.00889312
	4Y03	62795662	62730960	0.00103036
	5Y01	48176516	47538950	0.013234
	5Y02	49852542	49650496	0.00405287
	5Y03	55077640	54000856	0.0195503
	5Y04	51911170	51375764	0.0103139
	D01	50149258	49768228	0.00759792
	D02	55215180	55122128	0.00168526
	D03	62870044	62855602	0.000229712
	D04	59682222	59344724	0.00565492
	D05	59318706	58451740	0.0146154
	S01	76067584	76065656	2.53459e-05
	S02	67740844	67620074	0.00178282
	S03	60315592	59595954	0.0119312
	S04	55713290	54721078	0.0178093
BSLXCK	CK	54171266	54170666	1.1076e-05	3993453	2272180074	50834	569	563	5216744	4576065
	CK-1	65605442	65604544	1.36879e-05
	CK-2	74989610	74989280	4.40061e-06
BSDTCK	NPTJCK-1	58294340	58293348	1.70171e-05	5339577	3052686763	406400	572	566	7387982	6469929
	NPTJCK-2	57661434	57655554	0.000101975
	NPTJCK-3	63401838	63394732	0.000112079
	NPTJCK-4	63684526	63683870	1.03008e-05
WSDTCK	WSDTCK-1	72084492	72074512	0.000138	4040288	2401063042	99634	594	589	5713186	5005598
	WSDTCK-2	52411340	52123772	0.005487
	WSDTCK-3	67811606	67807592	5.9e-05
WSLXCK	WSLZCK-1	68298836	68216604	0.001204	4314033	2643589050	297429	613	608	6001297	5277243
	WSLZCK-2	68011560	68004576	0.000103
	WSLZCK-3	62503590	62502688	1.4e-05

## Sheet: Supplementary Table 3-1
Domain	Kingdom	Phyla	Genus	1L01	1L02	1L03	1L04	1L05	1L06	1L07	1L08	1Y01	1Y02	1Y03	2L01B	2L01	2L03	3L01	3L02	3L03	3L04	3L05	3Y01	3Y02	3Y03	4L01	4L02	4L03	4L04	4L05	4L06	4Y01	4Y02	4Y03	5Y01	5Y02	5Y03	5Y04	A01	A02	A03	A04	A05	A06	A07	A08	A09	A10	A11
Bacteria	Bacteria	Proteobacteria	Bradyrhizobium	878292	816127	1338147	873625	906754	853553	862043	2471483	790360	801514	737269	1964846	707714	1311479	992459	721101	770127	1079329	830729	1184013	1237736	1517745	777591	989418	985619	1001608	762415	820721	1216086	1503992	1538993	1344810	1977397	1269329	1193925	334904	481284	346126	613931	427102	627549	786093	949826	477238	582294	566958
Bacteria	Bacteria	Actinobacteria	Streptomyces	296577	214178	448971	343214	320740	490793	490715	626484	165219	207401	156937	988320	171233	290095	385473	611582	442056	858841	561216	262937	306111	502026	399025	431380	449459	520841	281414	399298	278295	303672	610608	300009	657235	347754	255530	101284	155649	152572	171297	106256	160917	283659	283581	164290	129225	150280
Bacteria	Bacteria	Acidobacteria	Candidatus Sulfopaludibacter	279774	326229	519982	323156	350628	204063	243806	224263	107997	141910	121673	278581	58241	129868	325199	202738	348832	310800	377125	157518	112284	162058	215969	318326	506179	585942	332863	192239	255107	143800	304103	153259	123458	152314	121091	72252	113864	109361	88556	58684	104193	191470	100885	125028	110978	138111
Bacteria	Bacteria	Acidobacteria	Candidatus Solibacter	265913	349516	551362	291316	340140	175807	191313	208228	98288	144195	116482	227704	51728	138262	315075	143665	350299	304614	351331	148424	103809	156259	203443	271928	496542	549055	326978	166560	227762	128007	234720	160584	121695	133394	117897	51530	91559	89321	68162	45337	75217	167892	82846	96202	89589	110053
Bacteria	Bacteria	Proteobacteria	Sorangium	228017	71144	122650	98779	139088	49403	49428	142670	213551	176690	144057	91545	23722	82394	90752	46072	61674	75583	69116	86009	63051	47883	69737	89474	133994	122633	72507	74804	47753	119032	53681	88360	66415	68429	165388	110967	145498	119447	177506	86361	177828	154035	129791	175640	141809	200095
Bacteria	Bacteria	Actinobacteria	Mycobacterium	186933	101285	186139	123879	120156	160230	149525	370429	71209	83147	91423	309059	81415	133569	129281	161508	139730	266219	188567	124402	136872	211575	127555	157674	185165	173376	105484	154315	109626	179812	194702	128669	241219	135581	150026	54939	70731	70015	89258	54968	85916	107469	82452	74396	60725	80936
Bacteria	Bacteria	Acidobacteria	Edaphobacter	165981	135695	255493	149734	259871	128397	107268	178668	47641	82619	81219	196285	50902	80440	185417	121104	162285	182382	233595	93786	86753	156368	137571	171760	226110	271840	126523	179506	112086	84938	147442	68603	115241	132439	53932	10417	20142	26839	28413	25042	28557	69682	73718	24052	30961	31366
Bacteria	Bacteria	Chloroflexi	Ktedonobacter	153861	115364	228615	223852	237225	374979	411245	251716	54136	104357	63666	719603	105024	110828	265079	453790	313736	606064	446297	119056	143748	186079	447161	294337	302349	457912	231697	289764	262902	173351	411910	138634	302246	279873	59493	18231	30693	71836	53248	44362	43998	267808	745033	63236	56491	46140
Bacteria	Bacteria	Actinobacteria	Micromonospora	152055	74839	212801	113195	101458	125013	141914	213375	103344	111763	72801	253167	44598	117842	112565	162134	144356	219201	212783	99188	107374	170925	149493	118054	147128	164759	93635	112367	85367	89027	172767	112296	236785	127477	107324	49513	97449	69791	78174	45988	70588	188556	308917	81863	63962	65797
Bacteria	Bacteria	Proteobacteria	Burkholderia	146686	155744	234208	189128	197232	160508	133927	172790	173367	172838	143031	228565	166979	143527	280934	124420	385898	253093	345002	122166	106975	124472	143573	177518	185738	205387	117967	141410	269744	171181	192755	130073	142188	159523	140633	128797	155118	107511	153659	89501	174026	165542	283462	136676	144139	197396
Bacteria	Bacteria	Proteobacteria	Labilithrix	124607	23924	69957	67287	81829	23716	34489	72962	48669	49999	38751	49117	9465	25955	60086	20429	40848	42929	37592	31461	25602	23248	36642	68945	95362	83623	43452	32305	20681	45745	30663	23804	19699	24204	30985	19426	23937	29152	30155	16516	32622	42507	61753	31861	28832	37763
Bacteria	Bacteria	Proteobacteria	Corallococcus	123165	104384	127085	123699	144651	102026	88598	88435	114421	134447	112870	136149	19432	71640	85957	175697	79917	160331	129961	86074	58138	56228	116782	101673	117136	207375	79801	142309	52454	82267	68818	74526	64112	116480	112080	105862	135865	99320	138860	83232	189452	193113	106027	194923	131102	191107
Bacteria	Bacteria	Nitrospirae	Nitrospira	120086	149050	131476	68089	47540	30899	27584	41471	64959	54168	75252	43134	9464	145226	36348	36223	29898	39826	54230	53743	55962	29490	42830	41010	50394	111597	37234	40238	52711	65556	30987	104366	54716	56820	68779	307724	274483	193050	347793	175495	325044	219961	88748	284028	219786	357860
Bacteria	Bacteria	Proteobacteria	Variovorax	115330	123719	221798	78871	88727	62412	37827	109779	286377	332605	226088	74417	50730	121984	74663	41156	64850	63885	69695	79534	52265	60239	49087	66574	111392	101022	53432	59956	83466	74823	167098	75369	70847	104404	119973	129320	134587	80472	166293	100020	176840	104644	127830	118218	146440	215468
Bacteria	Bacteria	Proteobacteria	Rhodoplanes	113995	118913	206459	105258	101702	85277	92589	264057	91613	81938	76964	203449	49594	166541	107550	62930	76153	110453	79802	128399	131595	180599	102594	117293	121495	112633	70631	97529	94663	151152	108404	145540	180681	98239	156078	63729	89007	44278	84132	52229	95029	108406	95025	98280	68267	71941
Bacteria	Bacteria	Proteobacteria	Sphingomonas	111664	161538	331510	166727	317007	90673	66175	126223	503016	439188	315578	288825	228948	72078	284470	171048	184793	330051	221102	94252	64726	90201	214541	154784	275839	169746	70712	212690	247236	79946	188218	49327	92715	132524	63815	126313	137327	80289	133080	87364	190085	179650	187028	140323	140296	199649
Bacteria	Bacteria	Proteobacteria	Pseudomonas	111341	120147	174612	116810	127302	87811	84868	122720	157562	164803	158021	147111	92866	111708	117551	88662	105360	135184	128299	95645	81125	107154	91273	110363	135858	149542	80229	85110	113642	106883	168082	96695	105569	110418	111909	138520	145858	95514	156900	92113	174337	142517	190624	133584	143499	240852
Bacteria	Bacteria	Proteobacteria	Paraburkholderia	109703	104923	201327	207627	217563	219580	120855	160774	97860	94834	83114	260143	279209	95405	435478	114448	786805	406732	615007	88673	76468	92386	163264	189629	174555	168940	107656	151629	520848	202929	225542	111340	122698	166766	98103	51000	65886	54588	74848	50752	85298	87003	464276	63426	84124	106752
Bacteria	Bacteria	Proteobacteria	Mesorhizobium	102018	106976	165711	114442	126998	106495	98518	192127	145455	126395	103159	206138	102194	122038	115710	90878	98737	136175	119555	107460	105186	131141	95328	116622	129909	134678	88911	100894	112699	134939	140876	120031	152521	118607	114347	77583	89089	68766	107481	68300	112881	122320	138136	92543	92707	118528
Bacteria	Bacteria	Actinobacteria	Actinomadura	100565	79733	176927	128771	123022	250245	237298	300082	37928	54269	42474	488461	72388	125657	175976	284479	202812	424647	253311	109983	139752	246036	179615	203443	196013	244291	122961	174614	127481	125277	314084	124250	309704	141697	71871	10733	21554	38558	35814	26705	28288	89747	82699	33045	27891	22977
Bacteria	Bacteria	Acidobacteria	Candidatus Sulfotelmatomonas	100285	55091	201371	56132	106654	55213	41543	62224	10253	29591	21637	83518	37472	32848	83579	52109	54626	83744	85254	22554	24725	28399	47166	70894	100846	107092	39093	58216	42112	32618	35422	19402	36291	33520	14415	2832	5277	7683	7744	5366	6889	30700	36564	7106	10110	8411
Bacteria	Bacteria	Proteobacteria	Phenylobacterium	95555	62461	176353	119504	176103	48297	28329	110086	129873	147226	167860	123933	209540	46503	137099	65814	83686	141121	74805	53050	34261	41552	68514	79694	122723	86420	42182	95263	140087	55775	64781	38453	47636	57531	43873	116013	109864	59614	236395	190289	130721	63195	210966	110506	193825	255196
Bacteria	Bacteria	Proteobacteria	Azospirillum	90582	105765	181376	129765	130799	89372	116001	168601	105228	100897	83626	236124	67078	106320	109183	114801	93018	126254	114245	80364	80054	92630	94021	116946	133241	135574	75445	95349	137195	117063	124743	98038	128348	120092	79298	64382	68623	72864	82414	50297	92583	146491	162804	88810	91995	114490
Bacteria	Bacteria	Proteobacteria	Rhizobium	79674	78043	121561	84428	89836	73699	68081	140828	103279	88325	78054	135405	79854	90599	92668	63740	88492	122080	99255	83668	81205	96629	71560	85656	101581	104056	72024	70887	97756	102564	116250	88801	113017	90126	86422	65491	69039	54623	85707	60916	93155	88304	112845	67429	70575	95215
Bacteria	Bacteria	Acidobacteria	Granulicella	77898	62779	132205	75324	125767	60203	53449	79733	22695	36063	32394	108768	37242	32536	113888	59806	79817	100427	110737	34652	32394	61608	77640	92658	121063	126476	51214	82807	53660	35333	69645	28245	46914	51229	20414	5993	11662	14176	13561	10392	14366	36352	40546	13897	15174	16545
Bacteria	Bacteria	Acidobacteria	Occallatibacter	76210	60748	172059	63554	145176	71146	34364	60838	15105	43622	25175	118006	100036	32802	130917	68091	60192	115943	89584	22078	22909	26643	55292	77717	108080	109443	39493	77700	50252	31544	32316	18793	33193	30165	12706	2281	6229	11457	19610	13359	11154	72267	58863	12808	19076	11895
Bacteria	Bacteria	Bacteroidetes	Niastella	74753	49519	93175	19429	79631	22276	4648	40694	167353	154024	111917	29648	18497	37110	29197	11213	21847	21139	23071	62377	37446	41462	18221	20001	49550	33879	40187	26443	23786	38663	11315	43523	34863	45765	81492	41697	75415	31609	73619	43509	70166	64235	56210	33234	52073	99618
Bacteria	Bacteria	Actinobacteria	Frankia	70759	48056	98321	67213	69639	99366	98031	150525	33139	45544	45552	206565	37273	71509	81540	117743	85916	179729	109166	61177	71482	116988	80888	91292	93603	105111	58410	86041	60091	76649	130975	69872	150536	77053	65402	19592	28387	30475	35592	22577	31644	55568	48397	32194	25389	29938
Bacteria	Bacteria	Proteobacteria	Hyphomicrobium	68908	52729	71017	41988	32325	37738	52926	113149	79024	64585	85133	73110	22689	88838	32661	21456	27130	33361	36353	80491	73873	85043	34170	44394	35037	36098	36091	25889	45836	78713	78408	103858	94505	57059	113218	50517	73175	28781	92182	41940	107562	91992	35720	55049	44600	56069
Bacteria	Bacteria	Proteobacteria	Novosphingobium	66787	41893	101283	59632	77206	29235	23712	65737	109592	114019	173236	53889	151185	42268	70968	30579	48121	54390	47965	29422	21499	21814	42689	55796	63222	50648	23460	34092	122885	43003	344052	25563	30694	40394	25678	35665	27987	35040	80940	85501	66475	35539	141877	32634	77934	102229
Bacteria	Bacteria	Gemmatimonadetes	Gemmatirosa	65690	68873	67599	25025	45080	13396	12475	28624	33778	38069	43786	29293	5415	40252	34049	12202	26329	29353	30932	26096	16766	23804	29928	26533	47116	36200	24394	41992	20998	19623	7527	31895	23004	28900	60629	71682	139819	80879	95677	47897	102844	121608	51622	87675	57760	90915
Bacteria	Bacteria	Verrucomicrobia	Pedosphaera	64680	39689	50254	38994	41108	26240	23210	28308	148781	124950	85652	40726	20707	41445	36973	23814	32269	27340	32008	38246	26501	25063	30044	33071	48030	54570	45585	29018	59826	38024	25356	47288	26681	41937	30828	52088	77072	61323	79892	46212	111355	57459	47262	77035	77778	133164
Bacteria	Bacteria	Proteobacteria	Cupriavidus	62929	74951	137402	77173	58248	43769	42051	59409	70664	74579	73580	60332	32210	73729	52087	37201	48213	51339	60280	52338	43480	41100	43706	56195	71281	81975	40064	39518	59118	57458	54911	54452	51047	64869	65566	68065	81529	52612	87984	40322	93529	76534	64669	67807	73871	112457
Bacteria	Bacteria	Proteobacteria	Haliangium	62613	21084	25035	15010	26916	8182	5504	32871	104068	87363	42618	22969	6415	24262	21658	5338	8415	12819	8775	21315	16916	9074	14908	13697	21825	16164	11381	24329	11161	29128	6421	26319	13818	19445	91248	53817	96652	72772	84855	37849	86004	71608	71383	125473	69037	107359
Bacteria	Bacteria	Proteobacteria	Methylobacterium	62385	61532	100417	62676	64496	48884	55974	121249	61401	58292	55286	112894	41331	72712	60260	44924	51566	70456	60299	62591	63019	78297	51642	62111	69780	72304	47036	50456	62671	79307	74937	73208	92117	63389	70001	37333	47247	35129	52729	30640	57317	67889	62672	46538	44829	56309
Bacteria	Bacteria	Proteobacteria	Archangium	61401	43081	56339	51502	62187	41108	37036	42329	59320	65584	53637	57875	9120	32665	38367	69233	34567	66099	51002	39058	26878	24589	47270	43660	52357	83338	34411	58979	24231	39665	31591	35224	27499	48330	58491	56405	68836	52078	73324	41028	98034	93745	52518	102068	66795	102188
Bacteria	Bacteria	Proteobacteria	Afipia	59423	60775	100067	61268	60323	49134	52163	131212	63428	60839	50635	110414	40036	80690	61284	42014	49509	66110	52469	67163	67481	88380	55005	68042	68947	66660	42940	51994	60430	81092	84676	74278	94961	62780	74565	41901	44044	39172	85995	82488	66550	60542	65669	45222	57761	56368
Bacteria	Bacteria	Proteobacteria	Caulobacter	57969	48257	113781	137871	177773	53467	38015	66886	86090	85668	86522	144466	204669	37847	150935	76430	84476	108656	86400	42294	37983	40630	76846	82476	93556	79851	43908	100045	155927	55756	77731	35381	41718	54877	35896	37557	42491	32970	56748	58600	56679	45253	112682	41276	68341	78600
Bacteria	Bacteria	Actinobacteria	Phycicoccus	57236	10841	13294	6811	7001	9901	8177	48138	5849	6863	24876	28161	5100	23181	16337	11214	9382	36180	14133	12523	16735	26192	14256	10879	12384	10418	9586	98462	11481	19923	12423	25186	37267	25934	54494	5934	13435	16878	14164	8917	10552	13196	6426	15641	8238	7775
Bacteria	Bacteria	Acidobacteria	Candidatus Sulfotelmatobacter	56298	67192	122249	103993	142472	111936	119349	68995	19647	36269	26606	158801	25577	32847	130478	159526	123708	204278	152289	35116	32885	41477	101865	139755	154641	207636	62568	101805	54362	39551	72615	28235	38904	57813	14635	4601	8880	15412	11240	8375	11376	45363	31052	14640	14853	13899
Bacteria	Bacteria	Actinobacteria	Amycolatopsis	56027	41282	87275	63397	60130	95852	94062	122523	27864	35261	27615	190644	32947	58670	73854	116038	82990	166333	106923	49896	58864	100304	76905	82722	88112	98394	52637	78867	53253	57352	113676	58465	130191	65264	49186	18294	29261	28325	31472	20020	29155	55516	57366	30588	23063	25285
Bacteria	Bacteria	Planctomycetes	Singulisphaera	54423	36573	50683	39377	43072	31724	43332	73504	26116	26694	31581	76804	24419	28426	37598	40290	61476	53484	62981	29895	30752	48502	34447	41887	52259	46065	40514	35447	29006	41328	65432	37686	54663	32330	24836	32050	38882	21901	36305	20791	44902	41405	16026	39858	32120	48323
Bacteria	Bacteria	Acidobacteria	Candidatus Koribacter	49698	47675	76650	51852	85922	42776	44339	41646	10244	17103	15408	56528	12354	24232	57642	47883	51496	61439	79112	26847	24370	34214	47083	56441	75268	105406	39265	49748	31908	24921	45652	20860	27883	30186	13835	5155	10731	16299	14407	9341	14933	41414	40781	15819	15263	15367
Bacteria	Bacteria	Proteobacteria	Methylibium	48818	66522	79141	32228	45384	20278	13673	30360	62053	79783	66148	23837	23484	47550	31422	14216	18028	24591	22035	29920	23810	22971	18382	25156	40068	33020	19779	26469	20315	27137	12113	33067	21656	29664	61330	60806	61601	28673	63693	48663	63887	39259	62127	51491	59314	81612
Bacteria	Bacteria	Actinobacteria	Nonomuraea	48305	36714	80614	60672	57078	108580	105717	130107	21291	28778	21277	211956	31836	54059	77372	127036	90144	182597	112162	48767	61208	104811	80358	90150	87081	107134	53532	77066	55866	55609	138509	55458	133247	62422	36331	9566	16371	20874	20309	14279	18323	45524	43116	19788	16027	15517
Bacteria	Bacteria	Proteobacteria	Bosea	47933	53757	76521	47994	45538	37282	39249	84602	60847	54787	48815	74866	30274	59890	41803	31189	38041	47750	44498	48788	45468	56401	36937	44440	52043	55864	35776	34701	44213	55524	65630	57289	63988	47343	59400	40483	46854	29514	49839	26535	56659	57014	42677	42241	39705	52060
Bacteria	Bacteria	Acidobacteria	Terriglobus	47615	40671	82462	42802	73281	35141	30240	44855	15327	23255	20729	57982	19120	21068	59027	34529	44734	57086	60202	21221	18981	31146	39827	50295	69513	74387	31607	45959	30416	22203	37769	18407	26539	28435	14615	6138	11069	10718	11612	8902	12153	26157	30595	11805	13244	14428
Bacteria	Bacteria	Cyanobacteria	Nostoc	47111	56857	64405	55174	53848	43597	45610	49780	36945	40273	35656	64495	30187	39613	48502	47246	49198	72605	64589	33619	29036	33770	45122	48855	62872	76648	40400	40542	52030	37715	56612	40966	41561	43442	44051	54078	70307	47228	61225	34581	74940	72004	67637	64100	51875	83287
Bacteria	Bacteria	Proteobacteria	Minicystis	47000	10573	19431	15098	38912	7978	8346	33874	27587	22693	19730	16422	4836	12962	19416	5951	8577	11967	9192	11407	8824	6417	13464	16320	21032	17811	9716	12960	8024	24641	9079	15566	14649	9550	22607	14168	19712	18019	29537	13722	25978	26403	24333	28626	25077	30121
Bacteria	Bacteria	Actinobacteria	Actinoplanes	46996	29126	67981	38951	35958	49027	51816	81994	28187	32126	23484	111670	18221	45926	45001	59387	50208	91205	70110	36747	42591	69597	53019	44758	52702	57387	33323	50825	32206	36131	63634	43063	92373	46041	41204	21111	39264	29726	29981	18428	26342	70533	75294	28550	22756	21568
Bacteria	Bacteria	Bacteroidetes	Chitinophaga	46985	27881	52070	17206	46674	19131	7833	26138	103203	95634	84416	26615	20865	20915	22859	13819	17444	21182	17453	31608	20680	21178	14011	17399	31806	25703	21953	19118	18845	22321	13006	24465	19352	27702	40318	25635	37941	18935	36140	20910	37834	42824	40496	22298	27873	52399
Bacteria	Bacteria	Proteobacteria	Bordetella	46830	55287	80893	52844	48288	33124	33179	48667	65476	67624	55653	56399	25769	53552	43119	33949	69613	96663	103175	41430	33954	64966	37574	47283	53400	57727	32336	33923	54002	45637	64214	42261	42401	47958	51680	61557	69311	41893	63862	34238	77582	67866	60677	58978	56859	82662
Bacteria	Bacteria	Planctomycetes	Gemmata	46775	32786	37315	34092	38781	26269	33760	54225	23676	24813	27697	53508	15141	28878	32508	23559	37261	38295	41965	30222	30880	35334	27841	39032	41632	39254	35230	30326	26044	38748	46678	38334	42911	30162	35560	27907	32779	17584	30994	17256	35187	33161	13816	37575	29660	39724
Bacteria	Bacteria	Chloroflexi	Thermogemmatispora	43999	31553	62065	62923	64208	96655	107025	66330	14283	27314	17575	175644	26697	29560	70297	127960	84229	161281	122421	30817	37180	47941	119448	78164	80308	119478	56945	74436	63717	42814	105090	35674	78348	69201	17928	6877	11221	23849	18143	13686	15865	81890	210117	20254	18854	16604
Bacteria	Bacteria	Proteobacteria	Caballeronia	42823	47091	70517	47925	57105	43887	37140	60153	36839	39296	33966	64677	37011	43083	52958	34730	58400	63667	58511	33167	29309	34120	36908	44752	58047	62515	33760	35422	48033	43368	49631	37269	42740	40462	39006	29100	36350	26161	36023	19784	41425	40723	36915	31698	36701	46727
Bacteria	Bacteria	Actinobacteria	Mycolicibacterium	41714	21121	46331	28313	23848	35158	29826	72840	15106	17408	22405	60950	29193	34396	32162	53249	31162	54550	38951	30187	32785	52043	29071	31680	44255	37054	24850	29551	36154	51540	48568	34911	59226	32342	49449	12900	17779	18071	23313	15354	20826	27285	25116	18566	16079	22348
Bacteria	Bacteria	Gemmatimonadetes	Gemmatimonas	41423	43736	45171	18806	28710	11062	11451	19091	126974	127322	191249	20994	4280	29512	23639	9356	18118	19621	21253	23407	13494	16567	19609	19386	31998	27245	17475	26752	15510	14870	8122	24767	16692	21281	41577	74641	114261	60028	83474	40026	91820	86213	38937	72597	53811	88008
Bacteria	Bacteria	Proteobacteria	Anaeromyxobacter	41210	26094	32508	27553	32431	20081	17477	26708	29765	33275	29883	29906	5702	25252	20444	28659	17540	30483	26732	24655	20959	16380	23272	21782	28191	41663	21083	28362	14510	28324	17898	25962	19668	27604	35307	31290	46387	40007	47209	25697	55810	53425	33441	52376	39235	54643
Bacteria	Bacteria	Proteobacteria	Chondromyces	41182	11846	20677	16996	24193	8808	8745	25088	41702	33647	27335	17086	3828	13796	15880	8545	10478	13482	11239	13713	10293	7328	12518	15420	22417	20650	11334	13732	8011	19132	8599	15428	10897	11927	28444	20060	24373	21389	33473	15726	33820	27034	24116	30996	25818	37633
Bacteria	Bacteria	Actinobacteria	Gaiella	41039	33341	47229	31390	27525	18948	13772	37445	11259	18217	18004	39823	10407	45182	29279	17699	23992	27920	33004	33342	37309	68834	23536	20244	33223	28845	27610	73248	18696	50021	24078	53257	65039	35036	99493	23222	43098	45060	50794	32595	42837	44109	18442	56833	22942	17977
Bacteria	Bacteria	Bacteroidetes	Mucilaginibacter	40216	23179	45996	24761	46560	27308	9845	23678	42251	40581	38639	52989	40800	16737	40106	23947	24384	38901	23627	24661	17361	17113	19714	23281	35885	26260	19582	33798	33264	18530	14830	19539	16907	23984	27619	14147	21092	13816	21615	16932	24568	29859	32986	14548	23056	37190
Bacteria	Bacteria	Proteobacteria	Myxococcus	40145	30819	38487	35651	42231	28920	24619	28222	39297	43570	36307	39521	6612	23128	26238	47512	23928	44956	34845	26624	18348	16822	32593	29607	35475	58644	24192	40836	15952	26394	20836	23861	19047	33118	37301	37252	48316	34171	48026	27540	63662	60234	34407	64644	43753	65167
Bacteria	Bacteria	Proteobacteria	Nitrosospira	39670	62866	145437	36945	22431	17746	17773	22949	43204	45992	38726	56021	7636	53642	22671	17490	35820	19130	37638	34016	33301	44508	67232	23518	40385	45773	42477	16140	29220	25148	32721	37135	112490	54846	43434	46181	55186	38076	53136	24734	62334	111348	46502	44945	45762	78969
Bacteria	Bacteria	Actinobacteria	Rhodococcus	39641	29749	53428	40478	39551	56217	53530	77627	21071	27373	24854	108361	19447	40114	43859	64470	45253	91827	62132	35164	38587	63252	46461	48691	50678	59270	34510	50068	35291	42644	72033	41229	81961	44670	42115	17078	22262	21292	25921	15714	24488	35914	29935	23924	18442	22947
Bacteria	Bacteria	Proteobacteria	Pseudolabrys	38099	59727	91762	48404	36607	30672	33001	117204	47899	44566	45813	78152	23060	105212	39712	20211	28557	37324	33946	54710	54685	80480	40101	46282	43330	38137	25975	47161	46714	67955	35957	68935	86774	40492	75396	21905	42274	26977	47758	28142	54706	63168	46562	35131	27702	26894
Bacteria	Bacteria	Bacteroidetes	Parafilimonas	37876	8735	19520	3133	4741	1463	355	11683	4758	6772	9812	4122	926	5189	6123	532	3505	1148	3436	10552	9412	9195	2819	2623	9809	5760	9704	6065	3567	6949	1251	5935	10876	13836	13683	3544	5093	2386	5607	2819	4278	4511	3267	1866	3267	6681
Archaea	Bacteria	Thaumarchaeota	Candidatus Nitrosotalea	37766	174398	170991	179932	34395	144922	191469	25554	3451	5994	9140	41319	50915	30490	31687	118343	298524	408644	418247	152147	599001	238838	103108	99026	157719	525279	251640	13287	398670	75381	187255	113396	129308	119057	23286	1423	3705	27383	11001	13085	10311	42866	18512	8800	9783	8281
Bacteria	Bacteria	Actinobacteria	Nocardia	37651	27105	55227	39906	38220	56047	55584	78590	18933	26455	21920	109420	19855	36906	44138	67530	48977	95306	64028	32772	37039	59556	46418	50394	53438	62077	34063	45686	34602	38737	72244	37235	78748	41512	33534	13680	19670	19625	21586	13467	21488	33579	30628	20913	16064	20132
Bacteria	Bacteria	Proteobacteria	Steroidobacter	37401	30056	51192	37511	45099	26029	26549	42776	313238	155112	76575	38833	57215	30704	40214	20211	30279	34357	44631	41153	33867	24442	27330	41829	45245	46607	23961	20703	23041	37820	25890	24509	30837	30540	45086	47412	45797	13209	63931	24329	59804	39927	30302	34729	44736	52631
Bacteria	Bacteria	Proteobacteria	Rhodopseudomonas	37033	36686	65286	38430	35770	29562	32403	83121	35005	30921	29537	67285	19940	48611	36824	24147	28946	40453	31400	39674	40784	55410	33646	40224	41790	41300	24845	31282	33978	47185	40682	43335	55239	33630	43324	16666	23376	16225	27044	16942	28779	33655	31015	23279	20556	22449
Bacteria	Bacteria	Acidobacteria	Acidobacterium	36390	33542	62786	31240	48143	26547	25191	30080	155307	106696	44313	40665	14260	19317	39912	29891	30486	44792	46839	20573	15458	22432	26616	36108	48810	59097	24178	28804	23777	19095	32721	15701	19501	23014	20323	29356	59348	11876	28403	12024	25464	36316	41783	26459	27135	40557
Bacteria	Bacteria	Verrucomicrobia	Opitutus	35028	20535	33862	24986	23414	14050	11267	16471	181927	265108	157812	22149	17145	17473	25027	12872	16300	16801	18927	15914	9840	9437	22856	21236	26472	25811	13043	14414	22976	17643	16235	16056	15191	19246	15966	33683	33477	19353	37501	24022	45188	27175	27114	44681	46478	88403
Bacteria	Bacteria	Planctomycetes	Fimbriiglobus	34887	24289	29406	27165	30897	21058	26964	43089	21615	21909	26072	43881	12892	21542	26054	19636	29608	32739	34683	25080	24402	28758	22134	30818	32856	31886	27339	23351	23768	31190	38776	28607	34177	22973	23779	21953	27275	15609	26664	15272	31903	26752	10842	30274	23840	33080
Bacteria	Bacteria	Firmicutes	Paenibacillus	34840	33371	45992	39198	40596	37939	36832	36327	30071	33823	28852	58557	14206	28283	35180	43667	35602	54861	48994	27837	24628	27259	38179	38144	46544	57075	29500	36018	30061	29852	41388	29979	32869	32804	31139	36904	48824	34445	42104	25136	52816	46699	42447	44304	35359	54681
Bacteria	Bacteria	Proteobacteria	Microvirga	34620	37263	56705	35982	34247	29290	33173	75330	31185	29978	29196	63564	18827	45768	32553	25094	28035	35760	34073	37252	37330	47196	30241	36222	39886	41405	26917	27542	32783	46588	42736	44385	55512	34265	40560	23887	30411	19972	31084	16425	35453	39332	32740	26782	24681	31275
Bacteria	Bacteria	Proteobacteria	Rhizobacter	33401	46148	53193	18505	28960	12139	6988	19153	35936	42060	38834	13777	14165	31907	21424	8031	11325	14322	13749	19258	15381	15145	11799	14489	25655	20429	13284	16523	12143	16891	6647	22400	14457	17463	42659	38340	44871	19265	42486	33993	41784	26359	38988	36464	39963	55170
Bacteria	Bacteria	Proteobacteria	Dyella	32733	25606	70643	82375	83009	65388	49902	32913	61120	35903	21827	80465	289260	20517	163960	93202	161843	415317	93166	28698	31170	90260	51827	89810	65036	49307	45309	57251	135425	39189	85717	19059	51636	62594	14504	11789	24033	18115	37059	33872	20197	40404	311656	22852	58735	70159
Bacteria	Bacteria	Proteobacteria	Massilia	32461	38229	46669	29232	29702	18738	16749	24070	35691	36642	30750	28004	27419	29069	28590	19117	21017	26660	27015	20518	16401	15119	21951	25776	34242	36928	15719	20798	20727	21376	20512	21000	18713	22607	27494	32292	38326	25081	36944	19739	43933	39062	31131	33610	33415	50338
Bacteria	Bacteria	Bacteroidetes	Flavobacterium	31848	14796	31293	9429	20854	6909	4342	19249	47658	52230	86812	9778	7012	13759	10011	5581	7618	7676	9291	18292	11656	9997	6994	7766	15903	14851	11136	7426	14070	14137	55526	14395	10791	13992	20759	19294	26692	13234	25754	13703	27145	18182	15907	15932	19495	37422
Bacteria	Bacteria	Proteobacteria	Enhydrobacter	31509	30694	68514	30183	35158	16858	14729	33396	55761	55221	37615	42424	10806	28578	18734	20247	25748	31085	28918	26524	22363	24673	19369	18332	33739	28477	27677	21315	21054	26769	25458	24695	33223	29621	24402	13446	16873	8623	15652	10003	16082	28675	20787	24551	21532	27910
Bacteria	Bacteria	Proteobacteria	Sphingobium	31179	24083	49974	32364	45226	21489	15672	35163	76690	74284	59760	39864	107698	21581	51172	22731	28066	42988	29280	21620	15346	16625	26247	31745	35490	30379	16310	26249	73647	25471	159762	18027	21024	25471	19461	41836	30042	25020	70631	66735	76973	28640	94579	40152	58424	130232
Bacteria	Bacteria	Bacteroidetes	Flavihumibacter	30838	17887	34805	7646	27276	6883	1574	16391	75728	64753	55830	10358	5167	13914	9818	3471	7197	6886	7592	21913	13144	13385	5594	6968	17040	12095	13756	8428	7670	13857	3635	16459	11761	17226	29983	15135	23406	10286	20678	10695	23688	21267	15525	10893	14377	33273
Bacteria	Bacteria	Proteobacteria	Rhodanobacter	30834	32536	59001	69238	50506	36873	49283	31155	41118	40239	27455	100752	111545	26014	90538	136799	108664	335231	226341	46904	52824	1251547	177990	57548	46255	46999	77190	39603	91931	28965	78866	23795	232208	145687	20448	18011	25277	23710	36423	19187	28833	113349	124681	26038	30588	37964
Bacteria	Bacteria	Proteobacteria	Acidovorax	29787	31199	57013	21995	24888	14560	11500	22449	64951	72182	54312	20957	15983	27848	21193	12564	17956	19544	24639	21410	14659	22024	14788	19183	26179	24587	14342	16806	17901	20650	40799	20051	17316	20280	34782	35286	38832	19381	36260	18529	41405	29995	27427	30425	35023	52872
Bacteria	Bacteria	Proteobacteria	Ralstonia	29543	32489	46570	34914	30863	22605	23138	28689	26725	30146	26932	32096	23740	29244	32812	18364	34919	29625	39572	21358	17594	19705	22680	30576	33901	39112	17844	20236	27187	25288	25447	22537	22374	26053	24670	22300	27404	19859	28021	15690	32522	30649	30395	24267	26396	38009
Bacteria	Bacteria	Proteobacteria	Stigmatella	29371	22328	28486	26231	31139	21518	19411	22463	27233	32004	25356	30737	5732	18166	20354	32810	18818	33449	26642	20867	14306	14650	23821	23085	27265	41821	18749	28448	14417	21706	18869	18924	16522	26047	28308	28074	34502	25396	34960	19990	46012	43917	26068	46342	31653	45996
Bacteria	Bacteria	Proteobacteria	Candidatus Accumulibacter	28938	42195	46674	30180	24604	18289	17658	26322	32533	35170	33008	25428	11227	39955	23459	14509	20359	21308	27443	26198	21223	21802	19667	22503	31138	40443	20341	17106	20065	25663	22358	27449	25249	26583	34543	38795	45477	28307	40358	20098	50097	40967	28026	36838	35385	54569
Bacteria	Bacteria	Proteobacteria	Achromobacter	28935	32880	47567	30852	28944	20284	20212	29745	40393	41252	33520	34731	17711	30461	25681	19567	28663	37842	38697	24066	20204	27609	21843	27180	32169	36582	18920	20066	36506	26309	263425	24922	25566	28358	30301	32498	37658	24048	37056	19246	43038	38737	48335	32915	32218	46415
Bacteria	Bacteria	Actinobacteria	Pseudonocardia	28414	22645	41542	32348	30477	49717	46519	69872	14566	19144	14972	102639	17690	34656	37689	57283	38919	83572	51480	27696	31878	54960	38480	40995	41083	47164	26395	45325	27811	33745	58544	34473	80605	33553	29308	10939	15871	15736	19024	12493	17524	31383	25072	16989	12790	14698
Bacteria	Bacteria	Bacteroidetes	Flavisolibacter	27766	33005	41147	6343	16251	4811	1476	11839	72792	108319	66518	7969	3451	21221	8355	2773	5288	5999	9085	30051	18040	21207	6146	5071	16460	12043	13820	10915	8801	14596	2900	21730	14889	17084	64633	26268	47654	22125	39564	18471	45504	33844	17230	21189	24412	59928
Bacteria	Bacteria	Actinobacteria	Microbispora	27082	20763	46976	35036	32579	63763	61873	75749	11320	15952	12096	121872	18555	32325	45116	73803	52646	106466	64529	28482	35737	62224	46594	52386	50392	63637	32364	45159	32891	32123	80791	32551	78529	35908	20479	3626	7244	11359	10263	7588	8780	24185	23237	10135	8043	6951
Bacteria	Bacteria	Firmicutes	Bacillus	27007	25216	35898	31489	30245	30860	29970	29275	22499	25133	21573	44911	9430	22187	26613	33611	27297	40812	39203	21630	19632	23948	29899	29663	35121	44586	23401	27513	22918	22903	33684	23877	26719	26144	24477	29167	36401	27480	31917	19046	39805	35229	32240	31631	25150	40223
Bacteria	Bacteria	Actinobacteria	Geodermatophilus	26594	21721	38946	29480	27678	45794	43699	64820	12241	16977	14417	92211	14847	32785	34576	51282	37378	76966	49797	26736	30907	54848	37478	37974	38985	45150	25733	40156	26152	31860	54160	33694	69453	31669	29823	10025	15981	15765	17343	10872	15394	28428	20553	16548	11590	12873
Bacteria	Bacteria	Proteobacteria	Cystobacter	26226	18409	23986	21775	25068	17916	15962	19506	24177	25241	20010	25309	5145	15135	16540	26783	14465	26503	20897	16108	11970	11238	18954	18527	22395	34321	15900	22979	11491	17170	15944	15356	13458	20065	23323	22380	29481	22039	30249	16668	39070	36919	21457	38210	26927	39500
Bacteria	Bacteria	Proteobacteria	Polaromonas	26011	31684	53877	21568	21556	12586	11347	19102	68398	69103	52246	16090	39540	28304	19662	10453	14927	14194	36679	20600	14014	43621	13397	17520	23932	25989	17717	13335	14007	19365	18774	19332	17147	20030	30666	40243	38923	21753	38367	27795	42678	32476	27112	31566	35287	56386
Bacteria	Bacteria	Acidobacteria	Acidipila	25992	20555	45250	22665	34583	21061	19556	25150	5556	9753	8619	29512	11189	10523	29107	20890	23466	31041	37008	11856	11805	16759	20188	28333	37638	46020	16617	20952	18594	11941	28636	9144	14631	16777	6382	1948	3575	5009	4636	3133	4360	18968	23955	4467	4850	5083
Bacteria	Bacteria	Actinobacteria	Mycobacteroides	25490	19813	32993	22507	23757	26269	24310	39299	22949	24214	20371	50448	13360	23456	24665	29175	24700	44736	31059	21412	21542	31007	23002	25058	30659	32495	19806	27138	20697	26076	32652	22866	36099	25657	28291	19297	23806	18266	23356	13560	24844	27710	24279	21787	17561	24432
Bacteria	Bacteria	Acidobacteria	Bryobacter	24959	34079	52216	27460	31901	16766	17191	17689	59311	48783	40187	23387	4778	14226	28402	15971	26414	25925	27326	14792	9167	13840	17962	24453	39886	44404	23535	19197	19171	14482	19571	16049	11731	15613	17364	12540	16168	11986	15624	8684	15687	21019	11531	16064	16026	22247
Bacteria	Bacteria	Proteobacteria	Geobacter	24518	23376	28350	23145	22182	17782	16856	20619	18529	17998	19923	22738	6187	22486	17064	16126	17118	18814	23302	18713	15021	14392	17829	18954	24743	31840	17049	14912	15549	20222	18688	21235	16169	20222	20191	34327	40378	30965	38313	20108	46898	35675	20717	35064	31037	48379
Bacteria	Bacteria	Acidobacteria	Luteitalea	24396	43516	37390	22327	30865	12958	12061	14554	44371	32680	25592	17631	3065	25774	16585	17454	16349	21225	19628	18844	11496	12588	12497	14367	25044	28924	17144	15529	11383	14785	12210	24296	11585	14442	36452	49461	71164	26435	42676	20181	51732	35443	18998	41131	31370	49849
Bacteria	Bacteria	Actinobacteria	Streptosporangium	24246	18321	40727	30278	28206	54217	52740	65548	10441	14552	10288	103048	15831	27829	38717	62928	45376	90263	56403	24319	30337	52948	39479	45082	43797	53583	27663	38950	28370	27420	69324	27763	66389	30303	18527	4088	7860	10035	10007	6991	8390	22213	21306	9532	7811	7287
Bacteria	Bacteria	Proteobacteria	Collimonas	24239	26817	33467	25224	22078	15974	16152	18162	18355	21201	18812	21325	15900	22524	21125	14448	16840	18142	21978	14989	12932	12448	16555	21271	25044	31015	12741	13986	15951	16518	15819	15780	14434	18997	17820	15333	19495	15180	19513	10259	23632	22286	19331	17129	18971	25968
Bacteria	Bacteria	Proteobacteria	Magnetospirillum	22107	24797	45021	34092	33503	22958	30096	41946	33416	29940	22227	60172	19795	25825	27225	29995	23575	33045	29179	20240	20820	24033	24030	30280	33925	33655	18996	24840	33307	28758	33362	24200	32924	32214	18872	15502	16330	18377	20259	12447	22887	36774	40953	22516	22914	30140
Bacteria	Bacteria	Proteobacteria	Sandaracinus	21738	6363	11353	7484	10908	3820	3097	12327	32239	27736	19511	10206	2180	8629	8208	2993	5049	7360	5371	11061	6605	4665	6521	7408	11013	9774	6303	7072	4995	12039	4374	8933	6723	6548	18874	16197	18459	13489	21566	12807	21431	18202	15355	23156	18280	27026
Bacteria	Bacteria	Proteobacteria	Roseomonas	21496	22714	42398	24447	26787	17567	20076	44204	21267	22157	19782	47365	12962	24704	20829	18006	19310	26343	22177	18983	17982	22782	17172	21611	26033	25616	15841	20498	21428	25262	24531	23822	32301	22584	21126	16926	17658	13627	18650	10500	20126	28609	23597	19211	18136	23212
Bacteria	Bacteria	Proteobacteria	Lysobacter	21155	39739	93681	19914	24308	15415	12387	18879	279582	498611	179297	20517	24073	21988	22512	12429	15680	22096	20382	25067	12060	13689	14224	18782	24170	25176	11873	17573	15839	18288	26040	13943	16334	18089	25677	42105	44307	18780	81276	23703	55612	29235	28535	27866	45003	69139
Bacteria	Bacteria	Actinobacteria	Solirubrobacter	21008	19688	26951	18776	23660	28181	23028	55316	12410	15477	19165	62133	12891	33921	25253	25532	23203	61952	31813	27187	30445	57785	23932	24497	25148	24880	20340	50082	17884	39843	29687	44615	65030	26171	70020	20851	34202	26824	37892	19786	28629	31571	12752	42482	17869	14984
Bacteria	Bacteria	Actinobacteria	Nocardioides	20637	14894	26046	17985	17827	26742	23993	41396	12184	13485	14116	53293	9378	21834	22471	31868	22241	47126	29084	17342	19849	32576	21710	22917	24881	26659	16233	30016	16625	21989	29993	24376	41418	21893	35785	18333	24244	13619	18920	9832	17100	23027	15779	16996	11165	13650
Bacteria	Bacteria	Actinobacteria	Streptacidiphilus	20336	13838	34408	23233	24237	41478	39328	51410	6790	10121	7991	83021	14129	20154	31378	48318	41483	76024	43413	18791	23198	39056	31138	36242	37963	42470	21172	30092	20914	21157	45458	19602	50525	25164	13724	1683	3842	6922	6154	4753	5126	15287	17577	5981	5367	4310
Bacteria	Bacteria	Proteobacteria	Herbaspirillum	20122	20504	25138	18047	15581	11285	10398	12274	19359	20977	17463	15873	14126	18623	16037	9916	15670	13577	17549	12004	9112	8536	12315	15537	16674	21030	8879	10979	12991	12776	12472	13075	11433	13926	15819	17295	20649	13814	19697	9993	24134	20788	18945	17479	19113	27099
Bacteria	Bacteria	Proteobacteria	Janthinobacterium	19818	22396	29282	19509	18848	12687	11979	16073	22059	22741	19522	18109	16883	19263	17335	12157	13686	15996	16828	13293	10462	10564	13057	16799	20532	24182	10548	12417	13188	14433	14405	13957	12905	15575	18324	20360	23428	14887	22594	12066	26423	21868	19287	19712	20440	29764
Bacteria	Bacteria	Actinobacteria	Arthrobacter	19529	14876	26645	21186	20261	30798	28074	35412	9913	13400	11280	54385	9553	18861	22082	34421	23886	47533	32876	16734	19424	30254	24565	24838	26084	30695	17198	27307	17522	19861	35381	20099	37244	21506	19555	9303	12878	12581	13272	8250	13482	19508	16749	12812	9412	11872
Bacteria	Bacteria	Planctomycetes	Blastopirellula	19520	16585	21379	14449	18167	10126	11560	19089	24418	23738	28867	19580	5523	15443	13710	9576	14268	15660	15928	18641	14284	15340	11602	13596	18124	17426	14086	12307	11427	18508	15288	19019	16224	13317	21342	42932	42541	19499	41222	21563	53492	30223	13452	39318	33467	55121
Bacteria	Bacteria	Candidatus Tectomicrobia	Candidatus Entotheonella	19233	31308	33920	43672	25199	30167	29416	33637	17100	19871	19365	33101	6985	40599	18388	22253	25543	29236	25231	26648	22355	24851	19358	22609	29632	37879	25480	18918	27305	35663	31349	41260	32727	32188	43444	62949	59959	36561	56831	37622	59335	50247	15305	51371	34864	48725
Bacteria	Bacteria	Proteobacteria	Nitrosomonas	18641	25657	30118	19103	14986	11069	11379	16376	23574	23726	20664	15447	5722	24093	13967	9613	13392	12559	17017	15889	12667	12837	13864	13931	20380	26361	12988	10429	12301	14563	15632	19223	15916	16531	22296	27259	31896	20305	29884	14324	34799	28884	18409	25953	27525	46058
Bacteria	Bacteria	Proteobacteria	Pelomonas	18465	17599	24896	13770	20251	10499	7729	13320	25123	31145	18933	13587	13957	14458	15003	8459	13996	12843	12119	10307	7737	6803	10657	13871	16956	17154	7843	10336	9667	10560	7427	10709	8577	11292	15697	22891	18133	15079	43297	42354	28420	14775	18535	23971	31133	46729
Bacteria	Bacteria	Proteobacteria	Duganella	18030	21983	28255	19977	22693	13562	12955	15334	21132	21866	17794	19241	45741	17388	20707	14964	16089	17251	17399	13388	10357	9405	13572	25247	23147	23999	10668	13016	14012	14149	15581	13459	11872	15461	16574	30722	22619	17002	26804	21690	29717	21195	22482	22248	24121	38793
Bacteria	Bacteria	Proteobacteria	Sinorhizobium	18006	19104	27736	18959	18845	16039	17585	38676	19860	18886	17609	31905	11609	22676	17863	12475	15837	19493	20240	20310	19709	25137	14568	19035	21310	22992	16307	13980	19719	25527	27700	23535	30511	20188	21730	13912	15717	11277	18418	10083	19876	19986	16152	15030	14864	20280
Bacteria	Bacteria	Bacteroidetes	Spirosoma	17894	16596	23198	11492	17436	9162	7404	12100	32261	26870	27842	13401	4941	11708	12407	9273	10795	12506	12361	13308	8908	9844	9289	10974	17324	17508	11748	10078	9422	10563	8835	12276	9579	12176	17447	16452	23212	12099	18825	10223	22136	18561	12148	15988	14980	26565
Bacteria	Bacteria	Acidobacteria	Terracidiphilus	17865	11986	29774	12592	24459	13015	11310	13589	2810	5699	4676	19479	7323	6816	19154	12393	13780	18251	18822	5929	5861	7154	10539	17559	22925	25015	9378	13898	9062	6978	10449	4965	7701	7727	4005	1565	2854	3129	2883	1992	2916	6159	5749	2814	2919	3553
Bacteria	Bacteria	Actinobacteria	Nocardiopsis	17451	13522	29364	21780	21061	41449	38613	48900	7404	10146	7983	80351	11978	20778	29302	47397	33360	69892	41673	18294	23168	40212	30359	34236	32217	40075	20988	29357	21431	20958	51494	20835	51018	23704	13083	2991	4941	7430	7063	5047	6055	16112	15003	6850	5493	5328
Bacteria	Bacteria	Planctomycetes	Paludisphaera	16817	12476	17178	12822	14741	10314	15129	23158	9666	8951	10516	24426	7877	8995	12223	14715	23458	17757	24038	9125	9387	17155	10890	13398	17870	15684	13732	11217	9199	12745	21991	12108	18134	10247	7516	10742	13677	7005	11997	6433	15304	14033	5325	12612	10441	15887
Bacteria	Bacteria	Proteobacteria	Xanthomonas	16448	18436	31594	17984	22095	15162	11643	16756	39124	47176	27669	22212	25737	15299	22648	14314	18555	29269	21313	14794	12246	24843	15150	17406	20385	20453	12181	14846	18747	16088	33331	12985	15821	17804	16165	20090	22144	14331	25013	13258	25228	23438	26740	19115	20941	30245
Bacteria	Bacteria	Acidobacteria	Bryocella	16342	13060	29855	15260	32765	12998	10547	15466	3984	6438	5656	25686	7560	6091	27467	14932	16483	25075	21745	6067	5862	10481	17449	18979	26921	25752	9165	21456	9738	6542	12276	4774	8339	9475	3772	1417	2346	2667	2618	1935	2779	6201	6243	2382	2763	3193
Bacteria	Bacteria	Cyanobacteria	Fischerella	15722	19143	21932	18407	17890	14950	16318	17828	11354	12916	12093	22594	5335	13466	15047	16253	15563	19438	21434	11776	10607	12326	15548	16548	20930	26273	14445	13984	13102	13411	19626	14645	14841	15096	14442	17924	23350	15016	19127	10941	24042	23571	16951	21204	15597	26532
Bacteria	Bacteria	Chloroflexi	Chloroflexus	15652	17451	19452	17604	17643	17404	17044	14063	9439	11477	9320	26976	4246	12901	15341	23201	17021	26701	23905	11525	10319	12484	19815	16471	20732	26271	13208	17610	11728	11742	18325	13374	14210	13633	14259	18800	24716	19162	21939	12453	27346	24966	19458	23503	16450	25143
Bacteria	Bacteria	Proteobacteria	Azoarcus	15488	26041	28911	20639	14672	10837	11405	12557	18360	19856	19954	13911	6604	23628	13830	9549	10878	12786	14759	13765	10537	8871	11837	14971	18670	24883	10048	10553	10914	14031	11728	15831	12727	15893	18618	24135	27486	18013	25379	12477	32894	26066	15955	23121	23307	38271
Bacteria	Bacteria	Bacteroidetes	Pedobacter	15420	9772	16625	7283	13368	6728	3912	8657	42232	36066	29713	10596	7349	7542	8406	5903	6312	7929	7206	10271	7072	6755	5841	6670	10906	9675	7385	7577	7702	7788	6825	8729	6775	9379	13376	11783	16365	8068	14944	7980	17537	14124	12015	10205	12415	25903
Bacteria	Bacteria	Verrucomicrobia	Verrucomicrobium	15359	12894	17186	12023	13144	9751	9032	16491	42587	39186	29476	15736	9388	12526	12183	7450	10140	9585	11581	13084	9814	10635	9486	11273	14331	15640	11726	9286	13956	13946	14410	14854	15454	13221	13015	17557	22271	13174	21488	11578	27397	15823	10163	20955	20457	34439
Bacteria	Bacteria	Acidobacteria	Silvibacterium	15113	14391	23460	14560	20586	14083	12922	16817	4071	6516	5840	19134	6897	7465	18621	13779	15568	19465	24798	8916	9021	11436	13354	18566	23771	32699	13067	12616	13509	8726	22862	7417	10884	12930	4881	1576	2448	3449	3173	2087	3277	10644	12431	2952	3180	3913
Bacteria	Bacteria	Actinobacteria	Microbacterium	15030	8853	16751	11186	10803	13906	12255	22424	10417	11424	10331	26514	6809	11857	12220	15692	12010	22724	16285	10142	11183	17901	12264	12384	14599	14865	9504	14919	12815	13312	25048	12198	23303	20227	18517	6537	8883	8620	10225	5835	10028	12057	12012	9130	7038	9293
Bacteria	Bacteria	Proteobacteria	Klebsiella	14978	13946	21386	14806	16455	12361	11098	14716	19590	20453	16169	20587	10792	13116	15266	12237	13290	18049	15475	12777	10897	14544	11821	14414	17114	18827	11106	12004	16234	13701	19831	11748	13590	15104	12981	14499	16101	10918	16210	10166	18439	18039	18591	14307	14127	20661
Bacteria	Bacteria	Proteobacteria	Enhygromyxa	14826	6162	8626	5950	8055	3284	3347	9401	19637	13852	10526	6310	1732	7118	5860	2987	4179	4955	5149	6935	4923	3939	4524	5341	8023	7410	5004	5338	3541	8193	4111	7146	5036	5414	14011	26040	20505	11886	33999	9820	41632	17309	12349	21668	23039	60892
Bacteria	Bacteria	Proteobacteria	Devosia	14532	14418	23088	15147	14520	12044	11098	20426	30062	24537	14537	22709	9224	15748	12849	11731	13242	17918	14549	13854	12282	15257	13929	13565	19233	18684	10996	11765	13550	14610	15972	15049	16490	13907	17951	12168	12507	9362	14953	8604	16387	16199	14211	14161	11746	16965
Bacteria	Bacteria	Actinobacteria	Terrabacter	14474	8854	9558	5206	4935	7029	5588	27365	10498	9730	11849	15612	2798	14210	7053	6219	5703	12153	8346	10559	10694	21187	7796	6099	6898	6784	8287	22421	10079	15036	10503	22504	37843	19962	47116	4124	5770	5811	8731	4811	6304	9360	4166	6979	4817	5341
Bacteria	Bacteria	Actinobacteria	Salinispora	14304	7694	20286	12616	11036	15901	17774	23345	12233	12042	7742	34278	5306	11914	13222	21097	16501	28639	22910	10488	11834	19572	15661	14498	16290	18705	10554	13563	9734	10555	21960	12124	26927	14647	10691	4579	8291	6976	7832	4741	6795	16341	23581	7602	6036	6670
Bacteria	Bacteria	Proteobacteria	Belnapia	14282	15760	28638	16485	17432	12556	16000	34821	10574	11427	12172	33950	9103	18626	13997	11140	12584	16605	13993	13425	13606	16491	11503	15403	16882	17074	10261	12548	13924	18503	17840	18117	24687	15752	15684	9074	9981	8226	11191	6509	11602	17480	12607	11075	10414	13013
Bacteria	Bacteria	Verrucomicrobia	Chthoniobacter	14225	11388	15534	12171	13234	10945	8869	23731	29229	25750	19713	16684	8902	11499	11562	7086	9509	9355	9981	12135	10395	11299	9136	11238	13377	13804	10403	8699	16670	14637	16899	14022	17622	13120	13844	13202	18250	10033	16572	9416	22957	13147	8443	16441	16962	27785
Bacteria	Bacteria	Proteobacteria	Oceanibaculum	14188	17551	30334	23129	21096	14347	20453	26464	18055	17173	14024	38941	8099	17402	17242	19827	15171	20104	18357	13276	13009	13955	15595	18928	22072	23002	12236	15356	18898	18994	20794	15762	20259	20554	12551	12221	11887	12720	13917	8471	16034	26357	29991	16068	16088	20066
Bacteria	Bacteria	Actinobacteria	Conexibacter	14184	15126	19678	14278	20455	23898	18843	48174	8222	10235	10040	51101	11874	25751	20658	18730	18288	56699	24166	22966	25099	48587	18526	20259	20558	18563	16958	39379	13100	34198	23194	31649	49503	20091	51618	8587	14860	14195	18885	11489	14828	18310	7305	16396	8623	7728
Bacteria	Bacteria	Proteobacteria	Methyloceanibacter	14137	10964	18286	9611	9709	10561	12445	43957	9667	8609	15343	23088	8550	26089	10011	5491	7270	10011	10049	28473	24214	31973	10560	12920	11452	10418	8817	9884	11714	33643	17020	29615	37390	18919	30365	9730	12515	10772	22839	10585	22877	21373	13061	14677	11979	12990
Bacteria	Bacteria	Planctomycetes	Rhodopirellula	13944	13328	14988	10245	12437	7442	8343	13545	19646	18712	19212	13565	4422	11596	9945	6917	10211	10699	11617	12215	9795	9985	8434	10204	13220	13394	10473	8301	8854	12370	11414	13173	11339	9491	13773	26433	27723	13366	25960	13311	33683	19305	9227	25493	22410	35612
Bacteria	Bacteria	Proteobacteria	Thauera	13841	22258	23886	16009	12027	8639	8191	11484	17409	18822	17422	11115	5155	20560	11554	6368	8759	9619	12503	12912	9420	8420	9901	11517	15088	20624	8591	8028	8969	12546	10788	13156	11223	12842	17083	18860	21706	13913	19063	9235	24457	20394	13132	17568	18546	29870
Bacteria	Bacteria	Proteobacteria	Hydrogenophaga	13828	14829	23937	11015	12323	7847	6791	11729	25713	27555	21261	11116	6618	13176	10346	7000	8145	10432	10936	10291	7910	9669	7578	9703	12939	12666	6853	7944	9068	10390	11581	10100	9366	10955	15526	17988	19034	9817	18032	9450	21085	14471	12290	14676	16270	23714
Bacteria	Bacteria	Actinobacteria	Blastococcus	13738	10404	19437	14319	13973	20762	19329	30195	7160	8791	8890	40917	7640	15372	16816	22995	17518	34979	23389	12860	14445	24387	16800	18202	19094	21430	11980	18594	12119	15354	26119	15011	30395	15105	15095	5338	8059	7869	9257	5995	8597	13704	10819	8869	6469	7871
Bacteria	Bacteria	Proteobacteria	Pseudorhodoplanes	13585	15607	23776	13479	12061	10601	11431	33581	12783	11573	11720	23984	6606	22580	12684	7066	9266	12670	10747	16907	17374	23841	12003	14073	14299	13477	9281	11673	12453	20678	13933	20031	24165	12561	21214	8503	12491	6763	12897	7289	14240	14787	11106	11274	8711	9754
Bacteria	Bacteria	Actinobacteria	Herbidospora	13552	10401	22497	15887	15842	29906	28088	35651	7446	9530	5866	56950	8981	15600	21474	34717	24665	50722	30370	13452	17239	29089	22172	24657	24199	30086	15027	21711	15241	15465	37552	15898	37619	17372	10453	2412	4670	6129	5700	3957	4822	12632	12159	5639	4449	4502
Bacteria	Bacteria	Proteobacteria	Ensifer	13485	14449	21327	13930	13575	11753	12543	26197	16235	16778	13378	23633	8676	16755	12773	9912	11790	14834	14485	14142	13514	16374	11274	13684	15438	16670	11480	10817	13281	16789	17941	16044	19822	14016	15679	11464	12810	9081	14665	7986	16218	16115	13843	11881	11640	16809
Bacteria	Bacteria	Actinobacteria	Asanoa	13437	7689	19866	11451	10852	17088	17186	24978	8641	9247	6324	33371	5558	12703	13201	19350	15868	28281	22092	11383	12824	21284	15993	14572	16063	19187	10635	13210	10297	10650	22344	12736	27786	13253	11163	3572	7720	6137	6551	4194	5794	14770	20304	6723	5437	4998
Bacteria	Bacteria	Chloroflexi	Sphaerobacter	13346	11249	16488	16331	14938	17109	16129	13069	5066	7706	6198	26025	3684	9472	13752	23620	14986	26167	23887	8161	8625	10797	18674	14995	18295	23268	11067	17893	10092	8726	17089	9618	12511	11549	9508	8459	12381	12099	11013	6254	12313	15591	13912	12458	7947	10903
Bacteria	Bacteria	Actinobacteria	Acidimicrobium	12638	8970	14605	8325	11333	10216	8681	18577	8391	8637	9370	20381	3759	11852	10513	11111	9025	16587	11780	11548	11831	15869	8196	11093	11168	11204	7401	11437	6279	15981	10878	13514	17584	9789	19728	4640	5869	5768	8092	4780	6626	9002	5948	8165	4992	5638
Bacteria	Bacteria	Proteobacteria	Rhodopila	12521	12537	27802	13649	18358	12390	14961	43604	6094	8208	9499	43284	9998	16923	12560	9165	11327	17615	12281	12218	13070	16759	9503	13473	14062	13043	8391	13127	13373	20007	16385	17853	31609	13637	12817	3310	4650	5134	5935	4193	4864	17470	10392	6693	6674	6673
Bacteria	Bacteria	Proteobacteria	Rhizomicrobium	12310	8213	27534	12696	18975	13145	5683	7452	18872	19220	15108	33148	17956	7477	15301	12101	9280	15432	12555	9431	7484	9669	14312	11573	19243	13533	7576	19846	15438	7456	7194	5522	7811	15328	4794	2294	3805	7162	5589	4993	6754	11238	24070	6351	9684	9644
Bacteria	Bacteria	Bacteroidetes	Hymenobacter	12112	11145	13962	8037	10602	6657	5663	8563	18395	16024	14669	9610	4115	8858	8565	6158	6965	8398	9376	8456	6233	6260	7399	7808	11625	12458	7457	7093	7626	7566	7353	8786	6747	8060	11410	14873	20631	11476	17684	9079	21057	15874	10246	15554	13799	24286
Bacteria	Bacteria	Proteobacteria	Beijerinckia	12091	12205	19559	12086	11819	9348	10621	25982	17298	14073	11236	22012	6337	15740	11042	8253	9496	12550	11149	12519	12478	16572	10840	12409	14101	14193	8525	10320	11443	15719	12774	14899	18170	11605	14481	9246	10960	6810	11297	6286	13873	14273	10451	11393	8685	12097
Bacteria	Bacteria	Proteobacteria	Nannocystis	11766	4532	6493	4423	6178	2804	2623	6611	14625	13089	8122	4981	1285	5025	4197	2722	3074	4145	3721	4692	3201	2553	3541	3922	5707	5897	3653	4604	2479	5826	3025	5190	3401	3919	10076	14536	14218	9055	19002	7154	28114	13232	8756	16575	15709	42195
Bacteria	Bacteria	Proteobacteria	Inquilinus	11696	14424	23066	16286	15775	11613	13887	21360	11549	11188	10162	26507	8240	13818	13383	12064	12403	15615	14777	10582	10290	12138	11258	14995	17058	17525	9578	11193	14393	14380	15201	12577	16347	14738	10463	7936	10690	8585	12105	6909	11478	16410	22327	11319	11362	14328
Bacteria	Bacteria	Proteobacteria	Methylocapsa	11656	10810	17831	11134	11138	10482	11614	29409	5854	6311	6657	21574	7325	13543	11204	7391	9441	10936	12617	11907	12372	15497	9809	12610	13212	14402	8463	8400	11092	15154	16171	13174	19891	10471	10824	2787	4184	4087	5218	3224	5374	8348	7399	4772	4943	5625
Bacteria	Bacteria	Bacteroidetes	Niabella	11561	10988	14178	2816	6898	2236	788	4890	37805	35257	29462	3345	1715	7370	3448	1377	2330	2330	3262	11869	6960	7473	2459	2362	6908	4929	5172	3002	3583	5664	1554	8298	5621	7059	21238	12177	18597	7706	16886	7773	20253	14032	8920	8858	11265	31537
Bacteria	Bacteria	Proteobacteria	Sphingopyxis	11434	12224	21796	14924	22380	8562	7323	13291	88942	60502	29672	19686	24893	10041	18600	11376	12374	15952	13364	9363	7211	8836	11932	12763	16317	13742	7129	12983	19886	10381	28729	7865	9347	10724	8916	13395	12370	8219	19304	13502	17783	12376	19242	11613	15604	23887
Bacteria	Bacteria	Proteobacteria	Tardiphaga	11315	12111	17972	11350	11806	20201	10115	24424	10975	10864	9595	20021	9308	15728	11117	8616	8794	12148	9634	12965	12400	16185	10116	11976	13318	12545	8034	9918	11438	15011	24895	15066	18128	11582	14516	10927	9251	6234	13051	20896	12765	12967	25923	10146	13008	13384
Bacteria	Bacteria	Actinobacteria	Jiangella	11257	8544	15553	11530	10903	17102	16289	21995	6205	7472	5974	32986	5325	11974	13317	19950	14401	28276	18828	10092	11542	19338	13967	14327	15032	17852	9871	15300	9498	11626	20017	12552	24200	12165	12365	5128	8203	7552	7585	4736	7350	12175	10303	7963	5076	5912
Bacteria	Bacteria	Proteobacteria	Agrobacterium	11231	10762	17939	11969	13038	10463	9440	18489	16825	16187	11924	19790	11875	12073	12997	9875	11252	16400	13659	11316	11072	13325	10037	12183	13880	13871	9256	10850	13802	13809	27344	11943	15443	12521	11826	9215	9474	7775	11385	7895	11775	12664	15887	9463	9997	13783
Bacteria	Bacteria	Planctomycetes	Planctomyces	11141	9165	12050	8752	10060	5874	7758	12382	12820	11970	12537	12987	3793	7806	7850	6945	10199	10316	10751	8046	7183	8938	6853	8167	10987	10097	7873	6863	6020	9224	10616	9504	10144	6554	8513	14556	16263	8014	14865	7955	19199	12682	5439	15427	12700	20327
Bacteria	Bacteria	Planctomycetes	Zavarzinella	11059	7024	8675	7181	8486	5557	7084	12339	5307	6175	7344	11278	3341	6317	7266	4943	7821	8308	9623	7048	6787	8008	6282	8762	9165	8582	7112	8972	5323	8677	9243	8876	9800	5853	8596	9326	12536	5177	9864	5264	10981	8313	3003	11536	7398	9286
Bacteria	Bacteria	Proteobacteria	Solimonas	11052	8795	15231	11489	12573	7926	7054	10155	14945	16431	17133	11712	18391	8362	11910	7670	8464	11534	10666	7873	6188	5679	7602	11713	12464	13042	6216	6858	11240	9240	11709	6712	6615	9882	7958	30596	23141	7363	29057	11691	39064	15360	14040	24071	20872	51396
Bacteria	Bacteria	Proteobacteria	Brevundimonas	10833	9557	20395	17330	22158	9135	7193	12326	32995	22723	19403	22347	20802	8848	18842	10893	12229	16950	14231	8872	7616	8223	11806	13000	16419	14558	8268	13854	20787	10319	13182	7966	8421	10454	7981	11172	11529	8520	14418	8794	14467	11454	15254	10441	12177	16384
Bacteria	Bacteria	Actinobacteria	Ilumatobacter	10731	8205	11624	5955	7518	6767	5253	14269	7428	6985	8536	13864	2483	9649	6630	6085	5232	10435	7814	9351	9597	12393	5505	6789	7270	7254	5261	8290	4488	12672	6198	11516	13431	7563	19157	6664	7107	4565	8889	4309	7421	7693	3832	7177	5159	5765
Bacteria	Bacteria	Cyanobacteria	Tolypothrix	10476	11166	16869	10924	12309	8339	7606	10772	17419	18819	13003	13937	8136	9707	10974	8723	9486	13309	11458	9058	7409	12436	9412	10211	12863	13237	8024	8655	9620	9905	11936	8904	10276	10508	10129	12248	14369	9612	15058	7882	15868	15185	14648	12997	12396	17352
Bacteria	Bacteria	Proteobacteria	Mitsuaria	10387	11065	16479	7655	12571	5768	3301	8163	14085	16695	12303	7763	9468	8683	8933	4828	5310	7694	5268	5661	4307	3744	4778	6585	9465	7866	3688	6451	5471	5747	3617	6045	4193	6296	10390	12097	10663	5615	12566	9734	12376	8853	19793	9201	13168	17342
Bacteria	Bacteria	Proteobacteria	Limnohabitans	10285	13253	19886	9231	8691	5107	4406	8593	20558	21954	17951	7401	3765	12808	7407	4026	5634	6086	8179	9302	7177	7405	5381	6740	9718	10351	5471	5515	5993	8425	6998	9434	7260	7786	13168	17217	19135	10444	16892	8132	22041	15313	10773	15433	15187	23384
Bacteria	Bacteria	Proteobacteria	Thiobacillus	10241	20064	18386	14550	15502	6214	6310	7467	17172	18679	15046	8478	11693	16270	11038	12375	9835	7305	10232	9318	6541	5794	7621	16285	20460	21630	6265	5664	6651	8724	6807	10138	7505	10815	13605	15784	18213	12258	16831	7962	21297	17904	10329	14685	15403	23093
Bacteria	Bacteria	Proteobacteria	Ramlibacter	10203	8561	24166	4785	4941	2799	2110	6847	28278	35007	29765	3970	1369	7875	3647	2437	2870	3986	3851	6552	3906	3515	3428	4424	6879	4930	3039	4379	2903	6122	2720	5273	4256	4915	11541	11186	14140	5133	11067	4680	12782	7751	5100	9136	10276	14593
Bacteria	Bacteria	Proteobacteria	Pandoraea	10101	11882	15129	11715	9709	6968	7380	8768	9602	10128	9314	10649	5484	11003	9149	6024	8989	9430	11824	7427	6214	7007	7636	9475	10781	13456	5751	6829	8368	8001	8333	7714	7758	8721	8716	8732	10553	7614	10052	5299	12033	11853	9735	8979	8972	13432
Bacteria	Bacteria	Proteobacteria	Chromobacterium	10008	13138	16205	11120	10208	6811	7155	9317	10714	11435	10463	10169	5914	11491	9069	6355	7759	8854	10109	7592	6047	5972	7442	8922	11486	14346	6187	6711	7689	8053	8186	7969	7791	8968	9902	8636	10734	8112	10739	5830	12592	12364	10245	9958	10236	15598
Bacteria	Bacteria	Proteobacteria	Desulfuromonas	9915	8194	10248	8502	8059	5808	6145	7838	6778	6987	7872	8008	2220	8044	5730	5092	6077	6497	8291	7132	5650	5076	6339	6657	9016	11219	6189	5169	5467	7744	7034	8018	5753	7011	7971	14860	18171	12151	16074	8489	20134	14213	9302	14976	12728	20648
Bacteria	Bacteria	Proteobacteria	Rhodomicrobium	9896	5128	9442	5717	5756	4873	9679	17905	4790	4078	5385	10988	3364	9046	4802	3823	5778	5005	5726	11322	11148	15287	5385	8746	7503	6783	6932	3051	7438	14893	12854	16351	22989	7485	9005	3507	4630	2343	5545	2709	6110	6788	4547	3923	3423	4291
Bacteria	Bacteria	Proteobacteria	Methylocystis	9828	9166	15242	9995	9818	8251	9692	22831	6349	6150	6342	18013	6169	11619	9582	7144	8557	10583	9954	9979	10500	13315	8242	10178	11365	11646	7906	7265	9431	13293	12143	12203	15970	9179	10277	4484	5823	4572	6529	4064	7399	8791	8518	5879	5607	6706
Bacteria	Bacteria	Bacteroidetes	Dyadobacter	9709	7285	10873	4533	8400	3918	2278	5989	23240	18331	18346	5396	3189	5546	5055	2896	3918	4554	4511	6729	4387	4422	3813	4157	7111	6581	4914	4123	4200	5027	3125	6153	4566	5639	9190	10065	12728	6553	10993	5916	12756	9302	7476	8884	8972	16136
Bacteria	Bacteria	Proteobacteria	Acinetobacter	9592	8852	14159	9678	11170	7314	6826	10995	14213	14414	13188	12909	7599	8397	9671	7687	8595	11658	10589	8648	7996	11417	7770	9323	11095	12561	7722	7600	9636	9586	11715	8000	9142	9605	9403	10271	11781	8347	12026	6979	13951	12648	12960	10517	10719	15897
Bacteria	Bacteria	Proteobacteria	Ideonella	9261	13343	16057	7774	10856	5061	3920	6752	13187	13504	12652	6732	6695	10624	8250	3853	4813	6280	5460	6345	4590	4051	4505	6447	9140	8136	3703	5778	4750	5526	3260	6995	4652	6107	11801	13527	12872	6534	13627	6591	15395	10260	8627	10481	13184	18710
Bacteria	Bacteria	Proteobacteria	Noviherbaspirillum	9145	11530	13022	10437	7413	5276	5928	6023	9413	9896	9846	7205	3529	10207	6889	5117	5349	6290	7196	6609	5464	4490	6139	7389	8889	11191	4671	5446	5567	6701	5239	7157	6151	7536	9128	12051	14370	10117	14222	7068	17608	14367	10033	12738	11337	18235
Bacteria	Bacteria	Bacteroidetes	Asinibacterium	9127	5288	9405	2226	6618	2013	601	4262	16304	12856	12168	3136	1640	3739	3223	1270	2235	2164	2381	6442	4196	4360	1705	1973	4997	3335	4527	2552	2466	4128	1317	4416	3628	4943	8697	4150	6624	2955	6474	3112	6750	7284	5181	3360	4333	10003
Bacteria	Bacteria	Proteobacteria	Methylobacter	9063	9994	12719	9492	8922	6655	7057	8995	10207	9734	9408	9916	4734	9071	8051	5829	7402	8120	9285	7336	5743	6544	6575	8580	10637	12380	6803	5892	7920	8106	9276	8091	7658	8011	8860	10396	12327	8759	12152	6615	14610	12471	8662	10841	10268	15278
Bacteria	Bacteria	Proteobacteria	Desulfovibrio	9021	8755	12463	9017	9602	6552	6694	9445	7820	8303	8378	10971	2872	8704	7619	7085	7182	8766	9448	7263	6269	6174	7254	7861	9984	12091	6736	6681	6696	7818	7631	8388	7499	7833	8456	11923	15342	9502	13495	7554	16650	12861	9798	13306	11102	17382
Bacteria	Bacteria	Cyanobacteria	Leptolyngbya	8984	9435	12152	9867	9798	8645	9263	10740	8484	9059	8389	13859	3409	8560	8968	9564	9208	12358	12562	7338	6488	7552	9586	9357	12127	15461	8310	7855	7556	8446	11641	9225	9601	8689	9338	11718	14212	9723	12944	7184	15602	13667	11019	12552	10383	16341
Bacteria	Bacteria	Chloroflexi	Roseiflexus	8980	16638	10661	9838	8665	8562	9320	7772	5241	6433	5544	13906	2128	8978	8285	12470	8842	13507	12630	7355	6705	8094	9987	8776	11087	13886	8285	9806	7111	7674	9654	10517	8225	8691	12049	15913	22933	15839	20217	12261	25242	20265	12238	21516	12705	17646
Bacteria	Bacteria	Proteobacteria	Rubrivivax	8932	12044	15915	6644	10498	4777	2974	7258	20121	17094	12087	6376	7514	9577	7760	3853	4342	5872	5016	5960	4364	3891	3890	5252	8235	6796	3254	5479	5100	5143	2840	6202	4337	5669	10810	14057	10718	5002	12650	6630	14238	9038	8519	8814	12831	18053
Bacteria	Bacteria	Deinococcus-Thermus	Meiothermus	8928	8825	12469	10277	9604	9132	8785	9279	7214	8050	6764	12554	2778	7241	8394	9951	8226	11603	12042	6793	6066	6764	8533	9183	11667	14703	8224	8316	7589	8113	11292	8547	8571	8929	8396	9097	12915	9171	11065	5910	13308	11643	8951	11232	8761	14099
Bacteria	Bacteria	Proteobacteria	Rudaea	8880	10993	18515	22609	47504	96937	4749	9722	23235	7460	4600	35541	112403	8106	71562	19774	9572	10163	7903	10939	6718	4045	16468	19164	22892	15595	4988	25444	22602	13391	8969	8628	13215	24908	4192	1375	4126	10464	8076	10357	7421	11831	25978	5200	12052	7448
Bacteria	Bacteria	Deinococcus-Thermus	Deinococcus	8822	8135	11435	9145	9019	8379	9128	9849	7634	8290	6587	14434	2979	6986	8085	10360	8392	12972	12301	6515	6141	7303	9072	9189	10953	13177	7130	8720	6654	7192	10666	7240	9598	7923	7506	8047	11592	8517	10028	5590	11632	11557	9086	10198	8181	12680
Bacteria	Bacteria	Proteobacteria	Methylocaldum	8803	10087	12158	9363	8660	6409	6663	8942	10228	9416	8929	10197	5274	9379	7567	6508	7090	8490	9392	7612	6342	6625	6741	7946	9661	11761	7167	5702	6940	8336	7902	8728	7843	8140	9136	12199	14546	9755	14531	7185	16183	14389	8712	12677	11335	17026
Bacteria	Bacteria	Proteobacteria	Nitrobacter	8766	8621	16691	8557	8488	7283	8679	20764	8482	7232	6639	16593	4942	11719	8748	5587	7758	9896	12068	9987	11357	20551	8189	9390	9931	9355	7018	7508	8531	12314	11654	11826	21096	10638	10921	3652	5065	3822	6479	3822	6118	16237	12349	5051	4499	5419
Bacteria	Bacteria	Bacteroidetes	Chryseolinea	8744	3899	6932	2622	7608	2488	1019	6514	143348	100371	102520	2825	2016	3360	3638	1518	2363	1981	2391	10935	2569	2446	1876	2754	5133	3439	3066	2483	2720	5967	1391	4301	3065	5151	12051	29439	28828	4345	25807	12547	24862	7901	7425	16485	17794	40304
Bacteria	Bacteria	Verrucomicrobia	Lacunisphaera	8594	3156	15589	3662	4808	2619	1608	3408	71094	102043	54612	3745	3011	3627	5069	1973	3183	2403	2130	3871	1946	1800	3761	3937	4532	4974	2367	2646	3280	4561	2592	3341	3387	3157	3486	9539	5909	4078	11526	8433	9076	4938	7754	10028	12584	19688
Bacteria	Bacteria	Bacteroidetes	Filimonas	8573	3711	7636	2016	5716	1994	624	3878	13033	13156	10239	3114	2171	2820	2831	1589	1832	2095	1893	5027	3221	3707	1555	2011	4226	2644	3624	2673	2906	3227	1386	3301	3144	4326	5797	2835	4388	2289	4380	2544	4711	5450	4786	2407	3245	6745
Bacteria	Bacteria	Proteobacteria	Methylomonas	8515	9879	12088	8702	8505	5948	6386	9518	10965	9936	9521	9973	5675	9315	8077	5493	7026	7691	9068	7791	6745	7540	6327	8004	10101	11621	7168	5541	8073	8423	8226	8127	7913	8143	8822	12908	13578	9630	12619	6859	14950	13010	8505	11763	11267	17076
Bacteria	Bacteria	Proteobacteria	Thioalkalivibrio	8461	9509	14401	9973	9079	6387	6733	8135	12585	11345	10388	12665	5527	9338	9178	6913	8035	10261	10872	7811	7100	7114	7071	9795	10762	11357	6019	6528	10802	7960	7654	7247	7407	9175	8808	12516	12629	8098	12231	5993	13925	12301	10496	10476	10738	15743
Bacteria	Bacteria	Proteobacteria	Reyranella	8373	8978	17646	7081	6452	3586	2681	7878	22525	19768	12831	7440	2013	8663	4021	3200	6012	5621	7193	8105	6527	6655	4846	4093	8097	7902	7006	4497	5057	6558	5905	6833	8077	7683	8456	5373	6024	2627	5661	3512	5088	5607	4940	6969	6706	9045
Bacteria	Bacteria	Actinobacteria	Cellulomonas	8345	6169	10698	7576	7215	11097	10006	15016	5400	6087	5449	19963	3420	8202	8727	11995	9146	17926	12466	7125	8327	13043	9464	9064	10165	11453	6551	10677	6143	8189	12460	8723	16098	8698	11308	3679	5718	4833	5538	3379	5419	8005	7077	5530	3813	4847
Bacteria	Bacteria	Proteobacteria	Acidiphilium	8242	7870	15757	9361	10517	8296	9302	22833	5125	6037	5941	22059	6697	10020	8677	7115	8475	11652	9862	7879	8092	10460	7033	9386	10494	10525	6899	8295	9584	12462	11523	10104	16673	9478	7683	3576	4129	4471	5348	3397	5152	10450	7669	5455	5496	6067
Bacteria	Bacteria	Proteobacteria	Rhodoferax	8240	10341	13438	7578	7817	4569	4170	6288	12220	13665	10685	6384	4848	8775	6848	4035	5466	5943	7735	5723	4303	6151	4605	6194	8379	8701	4404	4908	5658	5472	7252	6223	5075	5875	9674	10037	10968	5973	10317	5723	12104	8676	7278	9271	9863	15432
Bacteria	Bacteria	Actinobacteria	Kitasatospora	8217	5842	12380	9781	9501	15085	14486	18151	3692	4946	3905	29938	4930	7838	11228	17327	13323	25796	17142	7215	8995	14331	11666	12989	13563	14999	8074	11677	7566	8240	16568	7961	18431	9530	7028	1975	3528	3925	3805	2576	3759	7157	7535	4000	3062	3388
Bacteria	Bacteria	Firmicutes	Clostridium	8143	6695	10355	7915	8243	7291	6785	7488	9375	9603	8688	10767	2953	5836	6972	7802	6996	9977	8956	6130	5969	6013	6868	7462	9171	11100	6026	7316	6474	7124	8422	7681	6546	6952	9074	9059	11006	8296	9973	5923	12305	10155	8631	8971	8155	12744
Bacteria	Bacteria	Cyanobacteria	Scytonema	8111	10093	11086	8905	8913	7622	7768	8539	6136	6222	5501	11243	2887	7253	7319	7968	7479	9658	10138	6161	5604	6036	7628	8281	10982	13511	7170	6603	6991	6717	10244	7725	7217	7426	7511	9958	12690	8427	10915	6277	13215	12433	8926	11331	8509	14403
Bacteria	Bacteria	Cyanobacteria	Calothrix	8080	8463	10486	8819	8554	7079	7957	8549	6060	6711	5732	11239	2714	6433	7510	7569	7638	9624	10160	5657	4539	5737	7559	8056	10179	12303	6579	6839	5769	6081	8580	6938	6848	6904	7450	8547	11215	7946	9644	5388	12168	10742	8497	10359	7880	13488
Bacteria	Bacteria	Chloroflexi	Nitrolancea	7937	6079	9511	8146	7689	7337	7115	6612	3582	5004	3637	12141	1849	4900	6862	10391	7162	12146	12349	4632	4755	5981	8977	7646	9803	12377	6592	9080	5464	4683	8305	4916	6818	5582	5142	4185	6327	5850	5303	3009	6331	7386	6612	6539	3728	5612
Bacteria	Bacteria	Actinobacteria	Intrasporangium	7834	4549	6198	4770	4199	6167	5942	14418	4195	4635	5214	12554	2069	7249	5149	6566	5317	10871	7535	5246	5938	11161	6034	5451	5651	6291	4761	12429	5580	7307	8010	10625	17733	9813	17860	2271	3622	3611	4303	2620	3713	6361	3531	3921	2803	3170
Bacteria	Bacteria	Proteobacteria	Altererythrobacter	7798	5591	12653	6781	9418	4387	3201	6998	65306	43302	29736	8188	9448	5880	7677	4130	5428	6454	5733	5100	3564	3587	5911	6268	10002	7946	4431	5275	8515	5460	12107	4137	4103	4995	6570	7542	8524	4391	8458	5927	8645	6855	7532	5794	7722	9392
Bacteria	Bacteria	Proteobacteria	Vulgatibacter	7769	2451	3803	2937	3662	2093	1948	3664	3791	4461	3811	3098	557	2446	2270	3025	2037	3093	2636	2543	1984	1549	2396	2687	3428	4265	2051	3164	1524	3171	1937	2330	1833	2891	3662	3350	4834	4106	4697	2725	5773	5790	3925	5982	4205	6769
Bacteria	Bacteria	Proteobacteria	Stenotrophomonas	7544	8400	14024	7883	9458	7369	5122	7646	26384	39567	18213	10090	10682	6970	9592	8789	7489	11493	10175	7183	5573	12066	7355	7976	9561	10247	5575	6325	13808	7043	201362	5868	8687	8471	7980	9954	10601	6605	13480	6525	12662	11084	31115	8953	10454	15881
Bacteria	Bacteria	Firmicutes	Brevibacillus	7525	7690	10448	9509	9257	9608	8932	7690	5073	5967	5249	12757	2400	6357	8078	10387	8608	12662	11690	5390	5135	5953	9103	8637	10765	13190	6738	8234	6095	5972	9570	6504	6979	7200	7066	8122	10826	7555	8942	5159	11396	10289	10329	9379	7016	11963
Bacteria	Bacteria	Proteobacteria	Roseiarcus	7508	4717	8517	5170	6131	9081	9712	46423	2280	2606	2609	21232	6882	9952	6185	4552	6460	9721	9376	9996	13124	15691	5103	8374	7584	8567	8732	4886	8383	17696	17877	13439	28942	8437	6336	792	1082	1591	2156	1544	1848	8096	4277	1425	1822	1795
Bacteria	Bacteria	Proteobacteria	Candidatus Nitrotoga	7295	13532	12516	8504	4602	3626	3572	4840	9330	10297	9415	3843	1554	12097	5432	2220	4292	3073	6890	6487	4365	3734	5449	5122	7730	11485	4529	3347	4061	5664	4289	6674	5479	6462	8734	8520	10587	7629	9960	4334	12560	11722	6476	8469	9126	13890
Bacteria	Bacteria	Proteobacteria	Skermanella	7295	9165	14546	10358	10655	8385	10608	16832	8626	8118	6863	21065	5799	9835	8968	10012	7509	10431	9310	7178	6947	8245	8246	10015	10961	11702	6430	7891	10362	10408	11694	8716	12569	9988	7043	5022	5417	5626	6596	3919	7184	12535	13317	6738	7188	8399
Bacteria	Bacteria	Proteobacteria	Nitrospirillum	7277	6795	12618	9625	11489	7395	7090	10641	7095	7435	6747	14190	14252	6616	10253	7516	7508	11343	9711	5960	5829	6956	7145	9536	10444	10840	5668	7445	8458	7428	8201	5956	7347	8087	5029	3888	4578	4282	5118	3310	5807	7857	9234	5257	5633	6954
Bacteria	Bacteria	Proteobacteria	Methylosinus	7216	5988	11064	6925	6838	5689	6421	15308	4932	4537	5032	12641	4654	8003	6419	4697	5735	7728	6672	6729	6705	8846	5934	7114	8067	8146	5081	4927	6544	8773	8453	7892	10780	6464	6966	3095	4039	3228	4548	2597	5233	6520	5728	4382	4038	4737
Bacteria	Bacteria	Actinobacteria	Saccharothrix	7206	5553	11335	9053	7897	12876	13189	15035	4331	5459	3762	24217	3976	7432	9121	15866	10582	21199	14910	6517	7419	11685	10391	10761	11066	12876	6870	10568	6570	7115	14169	7168	15409	7885	6685	2761	4797	4127	4607	3010	4701	7159	6906	4826	3297	3912
Bacteria	Bacteria	Proteobacteria	Thiocapsa	7152	7979	10344	7323	7026	5219	5182	7650	8115	8094	7862	7839	3288	7744	6191	4414	5635	6140	7715	6426	5269	6136	5311	6292	8089	9294	5556	4447	5672	6900	6164	6611	6214	6504	7582	8505	9548	6708	9701	4940	10771	9081	6411	8321	7842	12462
Bacteria	Bacteria	Actinobacteria	Actinopolymorpha	7091	5549	10911	9061	8284	12872	12476	14038	3149	4508	3466	23440	3883	7151	9787	16455	11098	21370	14182	6277	7153	11435	10953	11384	11213	13853	7158	10593	6860	6897	15563	7205	14791	8103	6175	3055	5054	4119	4470	2693	4662	7538	6908	4685	3188	3948
Bacteria	Bacteria	Bacteroidetes	Pontibacter	7088	6300	7649	4288	5877	3179	2815	4816	15482	13578	12523	4802	2159	4884	4132	3417	3404	4220	4432	5436	3626	3672	3387	3878	5680	6053	3896	4000	3712	4509	3043	5426	3713	4484	8062	10805	13304	7045	11399	5808	14026	9160	6025	9455	8663	16769
Bacteria	Bacteria	Actinobacteria	Kutzneria	7041	4975	12048	9225	8647	15907	14203	15762	2722	3961	2909	26553	5407	6420	10060	18190	12419	22548	15372	6113	7174	11862	11964	12010	12377	13926	6923	10651	6981	6879	15937	6856	15396	8131	5084	1217	2629	3176	2730	2094	2706	6692	10049	3095	2392	2344
Bacteria	Bacteria	Proteobacteria	Acidisphaera	6986	6532	14329	7103	9548	6148	7848	20498	3299	4506	5039	20605	5256	8315	6553	5318	6211	9112	6657	5553	5628	7570	4814	6972	7464	7044	4307	6906	6552	8317	7907	7525	12504	6721	5683	2171	2403	2772	3461	2252	2896	9091	5826	3601	3989	3904
Bacteria	Bacteria	Proteobacteria	Thalassospira	6878	8240	13049	9487	9224	5906	7527	10087	12835	11507	8783	14923	5476	7863	7637	7619	7147	8628	9227	6347	5690	6586	6729	8107	9463	10244	5909	6765	9910	8189	8400	6710	8504	9249	5793	6684	6329	6239	8092	4755	9540	11820	11329	8194	8479	11526
Bacteria	Bacteria	Chloroflexi	Thermosporothrix	6836	5156	10781	11562	10009	15785	19685	10554	2110	4211	2660	28949	4686	4598	11001	21876	14696	27597	30829	5321	6412	8281	19375	12727	13464	20513	9778	12039	10381	6888	17760	5732	13987	11112	2608	985	1726	3550	2860	1999	2318	13936	42200	3273	3118	2478
Bacteria	Bacteria	Planctomycetes	Candidatus Brocadia	6824	7067	8399	6789	7753	4733	4796	5795	5911	6022	11789	6311	1347	6512	5117	4529	5663	6017	7151	6772	5202	4739	5094	5597	7776	8923	5835	4554	4644	6378	5532	7423	5431	5444	7279	17670	19788	9232	15939	8575	21667	11583	7035	15456	13450	23431
Bacteria	Bacteria	Proteobacteria	Chelatococcus	6824	7387	11305	7096	6640	5303	6320	12911	6650	6069	6188	11452	3400	8343	6455	4434	5526	7019	6765	7105	6557	8860	5413	6729	7627	7913	5805	5245	6353	8067	8155	8077	9644	6855	8667	5155	6355	4044	6490	3719	7229	8014	6040	6027	5115	6913
Bacteria	Bacteria	Bacteroidetes	Sediminibacterium	6767	3171	6079	1351	3480	1092	337	2876	14485	10681	8094	1964	897	2208	1726	601	1243	1231	1254	4279	2762	2952	1079	1168	3068	1927	3084	1963	1486	2454	937	2830	2498	3418	5439	2945	4095	1645	3930	1907	3962	4505	3176	2117	2684	6567
Bacteria	Bacteria	Proteobacteria	Legionella	6723	6399	9599	6986	7020	5514	5805	8965	5186	5491	5163	8944	4070	5809	6455	4698	5984	6827	8866	5797	5337	5973	5922	7600	8356	9494	5542	4647	6288	6688	7645	5487	6694	6048	5276	4940	6336	4457	6116	3608	7227	7103	4619	5554	5223	8886
Bacteria	Bacteria	Proteobacteria	Halomonas	6703	7396	10097	7155	7467	5467	5493	8029	8721	8645	9665	9611	4302	7653	6496	5507	5892	7615	7624	5975	5445	5764	5467	7001	8345	9062	4820	5300	6491	6722	7807	6750	6761	6641	7689	10820	11324	7063	10926	5694	12841	10810	8130	10191	9876	15596
Bacteria	Bacteria	Actinobacteria	Catenulispora	6544	6298	14261	15143	12397	22366	18848	16739	2734	5491	2851	52831	34719	5273	16150	23013	20030	35545	24770	7633	8780	12486	14936	14263	20438	22036	13351	14192	9696	6615	17282	6390	15425	18657	4228	974	2236	2551	2680	1437	1963	4784	6945	2374	1912	1903
Bacteria	Bacteria	Firmicutes	Alicyclobacillus	6520	5060	8991	8885	8301	9751	9512	8279	3112	4617	4033	15161	2398	5139	7801	12240	8277	15097	12826	4794	4820	5866	9502	8741	9345	12812	6062	8405	5547	5091	9983	5338	8068	6519	4997	5021	6207	5507	5891	3600	6850	8446	8485	6017	4905	6915
Bacteria	Bacteria	Bacteroidetes	Bacteroides	6334	4807	7562	4626	5849	3677	2963	4448	9609	9616	8512	5725	3133	4060	4475	3545	3969	4705	4762	4419	3415	3366	3858	4172	5862	6575	4362	4186	4815	4293	4506	4327	3472	4483	5199	5695	7486	4612	6925	4105	8239	6369	6116	6359	6275	10245
Bacteria	Bacteria	Actinobacteria	Lentzea	6255	4527	9204	7479	6578	10799	10126	11974	3599	4239	3144	19525	3272	6250	7668	12390	9037	17164	11713	5635	6366	10583	8566	8735	9157	10753	5761	9046	5627	6046	11647	6231	13015	7061	5475	2243	3613	3221	3608	2309	3553	5983	5582	3584	2624	3196
Bacteria	Bacteria	Bacteroidetes	Taibaiella	6215	1406	5658	1206	1596	1218	483	1159	2897	3307	3296	1428	2882	1010	1097	794	1117	1036	787	1470	1089	1001	1120	805	1772	1171	885	1010	1936	955	850	1158	956	1244	1987	1332	1736	1044	2407	1276	2140	1696	1923	1127	1557	3095
Bacteria	Bacteria	Proteobacteria	Nevskia	6204	6007	12234	12983	14720	9936	8551	7763	8390	6992	5436	10324	23756	4461	14382	10594	10718	12388	11952	5498	4547	4002	6788	14569	12404	12026	5103	6376	10368	6838	7484	4259	5053	8357	3499	4316	4109	3079	5768	3178	6959	7365	14123	5265	5406	8506
Bacteria	Bacteria	Bacteroidetes	Algoriphagus	6186	4987	6757	3035	4885	1996	1620	3840	17336	13758	14283	3280	1401	4246	3060	1850	2544	2525	2919	4999	3151	3143	2245	2386	4312	4209	3432	2492	2835	3833	2069	4486	3160	3806	7154	9863	11570	4433	9189	4590	11064	6554	4156	6955	6857	13712
Bacteria	Bacteria	Proteobacteria	Thiomonas	6106	7341	10709	8043	6993	4965	5461	6291	5659	6386	5860	7701	3710	6912	5937	4714	5035	6336	7024	4829	4405	4744	4820	6900	7491	8741	4216	4818	5241	5386	5612	5229	5062	6221	5477	5718	6363	4595	6580	3362	7912	7824	5943	5730	6116	8760
Bacteria	Bacteria	Armatimonadetes	Chthonomonas	6084	8755	11924	9781	10381	6368	6344	5324	3245	5248	5944	12680	2214	5087	10605	9873	11629	15517	11407	5679	3706	4681	8590	10729	13862	15394	5720	9322	3746	5445	5710	4835	3490	4299	5155	5332	9810	7266	5675	4790	10137	12938	5522	10402	9443	11442
Bacteria	Bacteria	Bacteroidetes	Chryseobacterium	6033	4140	6857	3147	4816	2663	1962	3825	11975	11125	9572	3854	2075	3317	3139	2437	2729	2996	3234	4360	3243	3081	2470	2823	4413	4525	3098	2765	3309	3369	4400	3528	3067	3837	5532	4909	6566	3521	6551	3438	6940	5511	4590	4201	4775	9214
Bacteria	Bacteria	Proteobacteria	Marinobacter	6015	6813	9554	6542	6556	4907	4991	7063	11069	9717	11068	8345	4485	6944	5776	5049	5465	6976	6857	5977	5283	5730	5097	6170	7598	8288	5207	4872	6056	6310	8627	6676	6023	6051	7507	10167	10066	6643	11119	6273	12745	9164	6816	9087	9524	15978
Bacteria	Bacteria	Proteobacteria	Pseudoxanthomonas	5984	7370	13175	5680	6976	4586	3560	5268	24460	34569	15309	6287	6809	5658	6696	3827	5134	5809	6393	5627	3992	4102	4433	5355	7334	7159	3744	4414	5215	5399	201512	4520	4636	5615	5905	11167	9634	5381	14459	5569	11982	7909	9879	7137	8380	12582
Bacteria	Bacteria	Proteobacteria	Hyalangium	5899	3678	4921	4596	5307	4423	3537	4414	5624	5885	4870	5842	1186	3208	3424	6467	3179	6162	5085	4052	2497	2296	4180	4132	4614	8004	3071	5465	2052	4019	3420	3473	2852	4367	6143	6013	7076	4781	7332	4239	9988	9728	4977	10223	6362	10085
Bacteria	Bacteria	Actinobacteria	Curtobacterium	5894	4727	8556	5982	6101	7193	6705	9659	4742	5204	4464	13690	3985	5618	6496	8190	7008	13103	8380	5203	5514	7842	6125	6900	8036	8666	4998	6989	5526	5893	9651	5422	9560	6482	6388	4062	5318	4255	5265	3070	5390	6524	6053	5064	3890	5232
Bacteria	Bacteria	Proteobacteria	Acetobacter	5870	5169	10443	6031	7246	4907	5252	11477	4028	4206	4470	12135	4937	5492	5863	4602	5214	7321	6061	5034	4980	6301	4747	6010	6859	7116	4031	5433	6549	6504	6978	5699	8276	5918	5090	2635	3097	2912	3772	2546	4087	6016	5419	3525	3773	4914
Bacteria	Bacteria	Proteobacteria	Vitiosangium	5834	3299	4478	4215	4795	3250	2807	4289	4186	4815	4072	4505	899	2712	3274	4762	3101	4627	4210	3028	2320	2165	3283	3699	4503	6190	2840	4250	2007	3460	2858	3034	2570	3665	4839	3635	5066	3741	5178	2917	6768	6471	3622	6763	4871	6647
Bacteria	Bacteria	Acidobacteria	Pyrinomonas	5782	9744	7948	5649	5387	3258	3575	4018	5111	6984	4637	4377	1017	5743	4041	3988	4747	5108	6466	4013	2781	3423	4505	4125	7015	9555	4982	3403	3867	3623	5621	5499	3644	5226	8595	12614	15502	8348	10698	5156	13239	12136	7536	10645	8061	15410
Bacteria	Bacteria	Proteobacteria	Comamonas	5713	5543	8621	4682	4816	3209	3257	4637	8978	9634	7092	4875	2933	4720	4396	2859	3958	4803	5175	4001	2994	4146	3860	4345	5389	5738	3529	3319	4573	3977	9949	3931	3701	4098	5366	5426	6251	3729	6172	3512	7170	5945	5805	5324	5699	8507
Bacteria	Bacteria	Proteobacteria	Dongia	5685	7672	10921	7379	6563	5776	5835	7987	7614	7466	7969	9195	2347	7400	5678	3976	6433	5949	8924	6642	5423	7132	4887	6473	8439	8989	5667	4180	6658	6650	6226	5572	6807	7561	5176	6073	4257	4798	7921	7533	7006	12243	14897	9068	11230	11906
Bacteria	Bacteria	Spirochaetes	Leptospira	5611	4631	5899	4808	5178	3703	3758	4869	6767	5602	5751	5577	1986	3991	4325	3426	4043	4910	5224	4103	3482	3055	3803	4642	5809	6463	3476	3405	3681	4311	4413	4150	3680	3989	4832	7276	8606	5921	7751	4311	10031	7301	5661	7803	6524	11219
Bacteria	Bacteria	Proteobacteria	Neorhizobium	5530	5498	8953	5505	5379	3930	4155	9020	5316	5621	4748	8426	3540	6058	4631	3978	4604	5887	5106	4886	4727	5795	4261	5161	6032	6192	3830	4130	5043	5912	8764	5705	6662	5070	5383	5836	5156	4198	6861	5055	6531	6491	5811	5052	4911	6565
Bacteria	Bacteria	Actinobacteria	Actinokineospora	5471	4348	8182	5845	5707	8325	8414	10968	3166	4004	3065	16758	2929	5577	6515	9800	7193	14814	9275	4982	5463	8875	7076	7466	7870	8982	4675	7687	4547	5494	9653	5680	11501	6097	5206	2611	3760	3071	3758	2691	3863	5760	5185	3902	2949	3472
Bacteria	Bacteria	Proteobacteria	Delftia	5434	5268	8552	4228	4839	3091	2506	4511	7800	8607	6896	4771	3436	4988	4205	2770	4098	4521	4682	4011	3187	3702	3319	3585	4825	4989	3383	3394	4214	3941	9693	4101	3773	4029	5780	6091	7238	3680	6416	3581	7412	5959	5815	5253	5783	8534
Bacteria	Bacteria	Chloroflexi	Anaerolinea	5411	6048	6420	7064	6046	6083	5441	4376	4428	4404	3425	7720	1332	4915	5376	6793	5926	8463	7442	5219	3661	4104	5717	6260	8458	10034	5452	5236	5397	4616	6926	6562	4339	6216	4900	11492	16052	7861	11971	7499	17382	10944	8471	14290	11267	23905
Bacteria	Bacteria	Proteobacteria	Aquabacterium	5372	6766	8622	4106	5340	2538	1756	3761	5617	8066	6990	3494	3972	5333	4179	2021	2572	3282	3071	3429	2479	2278	2382	2954	4791	4757	2445	2953	2450	3039	1558	3359	2641	3298	5838	5441	6103	3113	5816	2950	6837	4874	4002	4603	5442	7502
Bacteria	Bacteria	Proteobacteria	Pseudorhodoferax	5360	6231	8393	4150	4101	2221	2071	3578	8437	16400	7534	3338	1727	5256	3405	1888	2384	3031	3047	3483	2445	2517	2419	3191	4425	4293	2242	2779	5301	3308	15786	3779	2973	3465	6175	7068	7980	3587	6944	3660	8167	5368	6613	6017	6367	12055
Bacteria	Bacteria	Proteobacteria	Labrenzia	5317	5849	8885	5840	5886	5002	4928	9104	6865	6326	5370	9592	3029	6853	5716	4628	4548	6777	6003	5934	5329	6810	4549	5691	6637	6990	4428	4497	5611	6867	6393	6125	7450	5849	6111	5096	5457	4148	5909	3320	7061	6627	5264	6038	5188	7133
Bacteria	Bacteria	Actinobacteria	Actinospica	5314	3367	10956	6145	9100	12650	10977	14097	1381	2533	1740	26027	4669	4501	9603	14781	11426	27518	11764	4281	5708	9307	8369	11651	11483	12474	5478	8302	5630	4770	13775	4547	12669	6367	2772	222	687	1301	1226	918	753	4001	5393	1099	941	703
Bacteria	Bacteria	Proteobacteria	Kaistia	5289	5622	8598	5861	6332	6185	5082	9969	5881	5664	4470	11780	2789	6363	5697	6073	5304	9543	6688	5854	5933	7647	4911	6643	7551	7243	5584	5492	5463	8134	7316	6514	8417	6821	5814	3578	4572	4065	5275	3348	7013	5702	4390	7297	4688	6170
Bacteria	Bacteria	Bacteroidetes	Candidatus Nephrothrix	5253	129	426	315	1612	158	28	296	2042	1399	1765	600	73	69	230	171	408	64	167	582	2016	43	103	132	254	819	659	129	309	778	839	78	865	1197	239	527	666	69	340	187	468	201	340	282	335	590
Bacteria	Bacteria	Proteobacteria	Curvibacter	5245	4864	10356	4446	4520	2788	2831	4417	11273	13260	8533	3784	2813	4805	3741	2444	2977	3463	5153	3928	2801	4447	2823	4284	5147	5003	2498	3173	5178	3763	4071	3578	4029	4206	4994	5484	6164	3812	6476	3223	7359	5469	4484	5383	6377	8989
Bacteria	Bacteria	Bacteroidetes	Segetibacter	5211	3361	4744	925	2961	801	243	2140	3451	3809	3838	1224	575	2420	1359	388	1060	841	1338	3453	2198	2603	901	974	2523	1886	2533	1268	1226	2065	497	2577	2156	2565	5344	1910	3022	1949	2972	1416	3471	3408	2515	1710	1889	3980
Bacteria	Bacteria	Proteobacteria	Phyllobacterium	5174	5412	8012	5407	5649	4533	4877	9383	6119	5648	5036	8494	3442	6104	5241	3871	4511	5869	5840	5930	5604	6457	4388	5805	6555	6928	4410	4035	5374	6499	6767	6028	7366	5639	5935	4169	4820	3669	5266	2983	5899	5834	5000	4709	4277	6237
Bacteria	Bacteria	Cyanobacteria	Microcystis	5101	6171	7057	5972	5561	4838	4940	5534	4247	4641	3663	7230	1832	4727	5012	5009	5132	6947	6794	4222	3558	4435	4926	5131	6687	8589	4761	4478	4815	4566	5524	5163	4853	4744	5142	5967	7623	5097	6740	3767	8467	7065	6019	6914	5782	9317
Bacteria	Bacteria	Firmicutes	Moorella	5068	5119	7183	7673	7055	8518	6741	5564	3108	5087	4118	9953	1644	4379	5729	9029	6218	9904	9232	4187	3854	4027	7047	6551	7623	10859	4381	6986	4322	4561	7077	4510	4968	6135	4736	6686	7957	7578	7544	4089	9284	7929	5858	7774	5829	9155
Bacteria	Bacteria	Actinobacteria	Leifsonia	5059	3401	7626	4891	5032	7265	5979	12792	3479	3781	3287	14898	24602	4267	7831	8536	7959	17366	8810	4889	7405	11775	7198	6468	6930	6591	5613	7553	12480	5095	17163	4725	10585	8790	5024	1639	2510	2871	2994	1814	2742	9044	20193	2994	2335	2980
Bacteria	Bacteria	Actinobacteria	Jatrophihabitans	5053	3676	6938	4805	5097	8376	7208	13801	2567	3082	2451	19249	3856	7512	7876	8879	7033	14720	7869	5117	6164	12152	6636	7010	8134	6675	4406	9207	4320	6515	8421	6658	16993	6196	6786	546	1330	2394	2966	1984	2144	5589	3631	1813	1642	1548
Bacteria	Bacteria	Proteobacteria	Dokdonella	4962	8722	14326	5552	9947	9437	2463	4816	9686	9143	5610	7153	16575	7422	10212	4855	4158	5756	5704	9636	7871	7078	4797	5721	8746	6992	4924	4377	7680	8150	28849	7560	12439	12188	5333	5363	9144	9115	11199	8692	9873	12477	17439	8251	10394	11535
Bacteria	Bacteria	Actinobacteria	Prauserella	4962	3800	6918	5636	5306	9237	8842	11116	3169	3735	3086	19072	2739	5571	6654	11203	7242	15882	9554	4548	5246	9306	7328	7511	7413	8993	4528	7678	4893	5262	10701	5505	12339	5983	4713	2143	3146	2889	3254	2068	3123	5342	3934	2921	2246	2758
Bacteria	Bacteria	Proteobacteria	Vibrio	4952	4782	6899	5085	5040	3956	4327	5146	8579	7317	6146	6148	2700	4552	4473	3825	4492	5217	5730	4426	3569	4004	4297	4731	5879	6786	3744	3507	4604	4547	6240	4498	4586	4576	5822	5900	6898	4590	6801	3816	8045	5989	5067	6197	5923	9582
Bacteria	Bacteria	Proteobacteria	Xanthobacter	4800	4828	7934	5381	4713	3718	4317	9072	4324	3938	3553	8366	3129	5886	4811	3477	4072	5364	4843	4631	4744	6048	4424	5141	5592	5890	3382	3735	4834	5901	6205	5422	6537	4270	5063	2646	3370	2194	3590	2171	3879	4575	4494	3336	2966	3486
Bacteria	Bacteria	Proteobacteria	Asticcacaulis	4784	4172	8042	6723	8648	4833	3150	4958	9402	7205	5261	9912	22801	3531	8431	4980	9720	11067	10148	3556	3148	3455	5958	7807	7407	6683	4807	5399	21649	4542	6316	3324	3531	4211	3187	3019	3541	2670	4807	3546	4493	4165	7203	3380	4424	5523
Bacteria	Bacteria	Actinobacteria	Actinomyces	4743	3263	5143	3720	4273	4252	3521	6942	4012	3963	3891	8351	1507	4667	3908	4293	3392	6686	4608	4332	4221	5866	3369	4210	4403	4604	2824	4624	2363	5461	4136	4977	6436	4070	6892	3195	3874	3138	4051	2554	3961	4378	2711	3852	2631	3792
Bacteria	Bacteria	Firmicutes	Staphylococcus	4734	3823	6283	3646	4399	3123	2681	5743	6176	6032	5180	7303	3046	4348	3821	3190	3926	5064	3557	4348	3820	4578	3084	3378	4558	4695	2969	3719	5087	4688	5892	4102	5331	4598	4357	3286	3743	2624	4284	2689	4482	4597	5115	3513	3961	4418
Bacteria	Bacteria	Proteobacteria	Serratia	4715	4467	7387	5112	5755	3926	3668	5556	6430	6180	5664	6775	3585	4495	5219	4101	4790	6477	5999	4154	3486	5676	4104	4535	5693	6503	3705	3952	4879	4495	7753	3934	4955	4791	4299	4848	5543	3782	5474	3067	6188	5849	6119	5081	5062	7085
Bacteria	Bacteria	Actinobacteria	Catellatospora	4676	2363	6127	3442	2787	3631	3880	6225	7685	6859	2325	6515	1235	3692	3153	4283	4076	5746	6059	3554	3536	5549	4056	3167	4143	4544	2901	2912	2347	2663	4327	3631	7086	3923	4521	1618	3821	2299	2903	1870	3442	5555	7332	2833	2330	2492
Bacteria	Bacteria	Bacteroidetes	Hydrotalea	4652	2235	4244	1110	3637	1275	358	2229	4245	3848	4142	1746	1014	1675	1747	678	1210	1297	1221	2863	1941	2135	1082	1135	2558	1768	2209	1445	1473	1808	702	1868	1835	2549	3477	1189	2266	1347	2228	1197	2507	3843	3032	1261	1762	3495
Bacteria	Bacteria	Proteobacteria	Polynucleobacter	4638	5539	7323	4788	4121	3208	3144	5280	6733	5667	4428	4990	2166	6144	3798	2640	3506	3663	4725	4307	3810	3845	3237	4199	5094	6246	3093	3269	3187	4304	3536	4677	4703	4097	5182	5896	6773	4824	6524	3235	7942	5950	4021	6049	5311	8257
Bacteria	Bacteria	Bacteroidetes	Runella	4620	3361	4426	1954	3067	1612	1051	2593	10668	8367	8100	2141	986	2571	2071	1335	1872	1720	2116	3545	2181	2225	1634	1714	3297	3173	2568	1531	2022	2398	1671	2986	2450	2862	4666	5138	6284	2375	5080	2695	6171	3953	2708	3798	4177	8295
Bacteria	Bacteria	Actinobacteria	Saccharopolyspora	4607	4253	7489	6147	5442	9172	9785	11696	2486	3352	2711	18822	3098	5760	6536	10594	7716	15505	9731	4900	5789	9105	7112	7769	7690	9235	5253	7731	5626	6041	12415	5908	12939	6284	4683	1603	2709	2417	2952	1893	2655	5131	4601	3091	2081	2121
Bacteria	Bacteria	Actinobacteria	Gordonia	4602	3102	5679	3971	4038	5075	4552	8062	3396	3528	3433	10099	2109	4461	4387	6015	4576	9092	6101	3723	3961	6275	4353	4845	5462	5937	3356	4891	3309	4567	6600	4322	8212	4070	4984	2135	2857	2431	3030	1937	3062	4081	3216	2666	2170	2969
Bacteria	Bacteria	Proteobacteria	Luteibacter	4582	5072	8903	6031	7619	5346	4422	5038	6079	5583	4512	7572	11421	4278	9324	5119	6796	21992	6788	4423	4043	6105	4910	6407	7222	6457	4106	4982	7656	4655	7827	3869	5997	5986	3464	3364	4428	3836	5810	3550	4886	7148	17070	4225	5532	6816
Bacteria	Bacteria	Proteobacteria	Enterobacter	4570	4047	6585	4314	5288	3739	3306	4927	6638	6411	5404	6165	3576	4109	4617	3425	4317	5434	5265	4048	3404	4828	3695	4509	5226	5954	3151	3611	5099	4277	7348	3610	4223	4476	3825	4576	4992	3755	5074	5839	5923	5866	8850	4584	4469	6851
Bacteria	Bacteria	Actinobacteria	Rubrobacter	4570	3891	5705	5404	5365	6195	6246	6242	2240	3171	2426	10469	1583	3951	5133	7776	5336	9709	8057	3570	3741	5243	6281	5705	6257	8094	3994	6243	3800	4404	7398	4484	6542	4676	4557	3780	4974	4074	4435	2805	4784	5939	5324	4661	3076	4013
Bacteria	Bacteria	Actinobacteria	Kibdelosporangium	4503	3704	7077	5743	5214	8874	9040	10763	2278	3219	2436	18076	2766	5169	6515	10786	7109	15137	9169	4553	5243	8931	7390	7278	7469	8910	4829	7194	4728	4995	10762	5482	11729	6023	4134	1738	2583	2583	2634	1850	2493	4602	3756	2649	2141	2129
Bacteria	Bacteria	Acidobacteria	Geothrix	4493	10775	33101	18518	6662	7193	8161	3446	4185	3155	4615	15930	25068	4959	10677	26453	13690	15890	32385	5715	3479	3685	15121	15825	19794	20230	8114	5915	27877	6102	21291	3396	9866	9964	1969	2237	3329	3961	4647	2321	4239	11855	9204	4245	3776	4895
Bacteria	Bacteria	Proteobacteria	Paracoccus	4428	4539	6986	4488	4683	3517	3879	6810	4814	5065	4661	7178	2683	4896	4315	3528	3845	4908	4782	4380	4705	5081	3751	4429	5078	5425	3544	3529	4871	5362	6115	5089	6015	4612	5669	4249	4865	3208	5082	2702	6053	5488	5530	4244	4388	6049
Bacteria	Bacteria	Actinobacteria	Kribbella	4413	3895	6067	4924	4162	6995	6848	9157	3479	3295	3222	13792	2249	5617	5371	8366	5672	11654	7824	3967	4706	7876	5748	5735	5850	6828	3997	8025	4204	4946	8050	9246	14044	5457	7759	5854	10425	4238	7332	3449	5256	10575	5102	6479	3749	4335
Bacteria	Bacteria	Proteobacteria	Cronobacter	4380	4678	7023	4939	5359	3892	3304	4601	6339	6584	5358	6353	3280	4099	4729	3837	4465	6010	5239	3805	3521	5237	3959	4565	5471	5822	3644	3562	4823	4249	5895	3757	4507	4600	4273	4430	5282	3670	5643	3218	6058	5985	5734	4689	4756	6790
Bacteria	Bacteria	Proteobacteria	Komagataeibacter	4355	4112	7984	4877	5951	4190	4611	10002	3512	3837	4054	10954	5314	5113	4977	3791	4023	6356	4944	4625	4719	5784	3801	4735	5781	5415	3728	4382	6434	6144	6474	5967	7694	5280	5235	1970	2482	2488	2999	2153	3318	5284	5067	2887	3072	3773
Bacteria	Bacteria	Proteobacteria	Granulibacter	4354	4341	9428	4721	6718	3591	4252	11535	2936	3424	3417	12248	3585	4601	4364	3865	4201	6090	4465	3243	3229	4334	3346	4423	5284	5158	2665	4781	4596	4894	4244	4437	7337	4222	3379	1740	1753	2080	2242	1369	1914	6246	5097	2689	2950	2846
Bacteria	Bacteria	Bacteroidetes	Pseudoflavitalea	4351	2902	5363	1394	5334	1494	406	2524	87322	83791	22757	2096	1670	2178	1953	980	1524	1520	1506	3571	2150	2369	1411	1431	3184	2102	2457	1954	1548	2179	1017	2315	2094	2536	4119	3535	4467	1745	4547	2969	4208	3613	3404	2443	2874	7379
Bacteria	Bacteria	Actinobacteria	Knoellia	4318	1802	2640	1841	1756	2800	2680	5567	1215	1521	2357	6131	1031	3022	2715	2944	2409	5159	3113	2230	2683	4306	2496	2574	2771	2929	1957	6325	2054	2752	3342	3761	6260	3228	5462	1251	1987	2020	2154	1290	1769	2457	1482	2177	1348	1581
Bacteria	Bacteria	Chloroflexi	Herpetosiphon	4305	4734	5513	4797	4669	4283	4585	3891	3010	2878	2380	6827	1403	3408	4281	5912	4720	6809	6470	3335	2997	3343	5563	4489	5722	7276	3796	4464	3719	3250	4958	4095	4069	4090	4313	6015	8414	5445	6980	4098	8523	7853	9152	7535	5217	8771
Bacteria	Bacteria	Proteobacteria	Roseateles	4228	4337	6740	3008	5070	2427	1432	3256	6486	7014	5388	3152	4375	3437	3955	1751	2174	2934	2418	2477	1797	1468	1889	2570	3539	2963	1421	2431	2428	2439	1463	2374	2046	2453	3866	4145	3893	2031	5184	3531	4697	3130	4187	3628	4988	6482
Bacteria	Bacteria	Proteobacteria	Sulfuricella	4197	7430	7027	5009	2847	2024	2098	2708	6087	6530	5638	2498	883	7294	2940	1346	2671	1756	3747	3832	2898	2322	2933	2895	4401	6174	2691	2073	2887	3366	2228	4637	3100	4009	6236	6033	7758	6132	7465	3643	9566	7875	4643	6764	7013	10648
Bacteria	Bacteria	Proteobacteria	Aureimonas	4192	4235	6900	4620	4504	3524	3608	7165	4711	4475	4196	6955	2860	4560	4197	3105	3565	4568	4731	4154	3991	5158	3347	4431	4967	5254	3357	3242	4211	4935	5186	4399	5786	4154	4434	3179	3600	2449	3897	2533	4319	4439	4342	3685	3387	4525
Bacteria	Bacteria	Proteobacteria	Brucella	4191	4551	7082	4599	5089	3517	3180	6329	6685	6078	5210	7466	3474	5037	4638	3689	3927	5811	4350	4624	4012	4846	3690	4279	5621	5440	3468	4045	4924	5144	5344	4566	5412	4793	4617	3786	4138	3221	4847	3250	5142	5310	5697	4484	4102	5401
Bacteria	Bacteria	Proteobacteria	Roseovarius	4175	4578	6493	4579	4610	3613	4009	6695	4882	4990	4544	7126	2356	4792	4150	3475	3910	4478	4603	4287	3804	4910	3864	4494	5266	5416	3442	3398	4509	5002	4947	4891	5071	4538	4735	4593	4677	3296	5071	2751	5891	5465	4797	4371	4219	5960
Bacteria	Bacteria	Actinobacteria	Agromyces	4117	3389	5266	3565	3657	4223	3815	6734	3963	5060	3817	8190	2016	4387	3565	4417	3866	7138	5092	3681	3833	6458	3922	3892	4539	4751	3172	4828	3365	4489	5484	4974	7579	5004	7649	4692	5977	3313	7134	2805	6241	5221	4217	4510	3931	5755
Bacteria	Bacteria	Proteobacteria	Halioglobus	4104	3732	25038	2127	1784	1383	1351	2420	4016	4562	86616	2064	1481	4617	1763	1303	1419	1689	2039	2738	1722	1496	1367	1804	2542	2993	1556	1246	2055	4002	7561	2712	2267	1970	4439	7855	5782	3393	6864	5030	8033	3169	2886	5188	9544	19503
Bacteria	Bacteria	Actinobacteria	Microtetraspora	4091	3176	6854	4931	4828	8773	7982	10564	2071	2557	2088	16390	2392	5069	6036	10083	7367	14283	8631	4465	5531	9152	6901	7208	7089	8513	4623	6628	4758	5060	10935	5179	11329	5178	3771	1055	1742	2146	2259	1508	1889	4286	3703	2117	1637	1574
Bacteria	Bacteria	Chloroflexi	Kouleothrix	4038	11021	5280	4702	4139	4876	5442	4241	2728	3391	2301	7975	1283	4886	4230	6853	5035	8092	7118	4299	3988	5070	6037	4763	5916	7877	4816	5294	4590	4879	6313	6622	5363	5906	7710	9936	13591	9356	13181	8165	16161	13447	8428	13217	7262	10083
Bacteria	Bacteria	Actinobacteria	Cryptosporangium	3985	2596	5680	4069	3689	5661	5979	8400	1945	2370	2103	11604	1764	4411	4554	6978	4975	9793	6758	3632	3930	6743	5110	4926	5374	5618	3175	4616	3275	3987	7047	4193	8830	4051	3337	1247	1942	1892	2017	1265	1919	3571	3447	2053	1616	1668
Bacteria	Bacteria	Proteobacteria	Variibacter	3983	4900	6849	3865	3308	2846	3328	9336	3868	3739	3795	6679	1702	6539	3452	2190	2788	3703	3286	4803	4713	6767	3466	4079	4185	3881	2825	3101	3849	5827	4102	6295	6749	3958	7399	3245	4395	1977	4215	2249	4712	4955	3175	3474	2943	3128
Bacteria	Bacteria	Planctomycetes	Pirellula	3907	3054	3464	2016	2457	1401	1731	2940	7595	6753	7206	2714	753	3843	1839	1194	1925	2106	2104	5920	3492	2899	1627	1991	2512	2611	2621	1555	2019	4634	2369	4935	2920	2848	7803	24997	21544	6791	20042	9112	27106	11324	3588	16307	13769	25065
Bacteria	Bacteria	Proteobacteria	Nitrosococcus	3829	4572	6367	5009	4279	3666	3796	4363	4433	4128	3914	6042	2247	4691	4371	3778	4120	4631	5245	3668	3347	3154	3581	4384	5337	6263	3568	3211	4579	3772	4305	4115	3922	4356	3961	5606	5961	4483	5816	2867	6716	6083	4605	5058	4821	6708
Bacteria	Bacteria	Proteobacteria	Methyloversatilis	3809	6153	6891	5107	3423	2488	2628	2870	6611	6537	5496	3053	1904	5426	3374	1818	2488	2769	3156	3335	2284	2003	2760	3559	4374	5319	2287	2339	2593	3461	2400	3596	2914	4041	4856	7450	7798	4586	7017	3286	9098	6987	3952	6369	6308	10562
Bacteria	Bacteria	Actinobacteria	Plantactinospora	3803	2110	5543	3646	3070	3990	4378	5697	3286	3383	1878	7783	1447	3043	3308	5494	3851	6768	5843	2706	2824	4247	4405	3592	4200	4735	2798	3280	2514	2466	4940	2946	6177	3692	2829	1535	2636	1895	2103	1329	1964	4622	6786	2395	1850	1793
Bacteria	Bacteria	Proteobacteria	Aminobacter	3718	3906	5868	3807	3889	3083	3182	5825	5803	4857	4504	5893	2223	4020	3606	2972	3217	3953	4009	3350	3117	3753	2931	3731	4448	5019	2777	2775	3591	3796	4124	3549	4513	3426	3613	2814	3223	2321	3949	2164	4271	4183	4211	3437	3401	4770
Bacteria	Bacteria	Actinobacteria	Tetrasphaera	3702	2581	4359	3071	3161	5346	4909	7403	1890	2018	2166	10343	1903	3803	4144	6112	4170	9104	5290	3153	3334	6185	4096	4474	4447	5026	2959	5947	3025	3614	6204	4224	8375	4006	5893	1383	2181	1949	2474	1466	2116	3056	2525	2171	1552	1794
Bacteria	Bacteria	Actinobacteria	Lechevalieria	3699	2568	5379	4129	3744	5797	5700	6819	2048	2348	2033	11541	1761	3268	4355	7269	5068	9722	6800	3246	3736	5746	4833	4929	5195	6390	3440	4681	3311	3373	7705	3615	7280	3832	3224	2078	2951	2431	2750	1646	2874	3856	3421	2801	2009	2686
Bacteria	Bacteria	Planctomycetes	Planctopirus	3676	2890	4345	2848	3294	1776	1920	3167	4917	4232	5054	3641	955	2541	2611	1898	2492	3620	2696	2876	2280	2373	2134	2570	3388	3321	2551	2250	2112	3042	2589	3040	2585	2087	2877	5115	5334	3129	5334	2886	7131	4249	2304	5631	4862	7667
Bacteria	Bacteria	Bacteroidetes	Arachidicoccus	3674	1379	3070	796	2223	828	239	1653	3223	2959	2756	1399	1121	1002	1373	477	862	908	806	1973	1454	1866	657	835	1715	1113	1486	1201	1191	1251	619	1209	1286	1758	2181	931	1469	778	1413	897	1605	2440	2286	775	1263	2127
Bacteria	Bacteria	Acidobacteria	Chloracidobacterium	3672	5252	4193	3141	2968	2047	2106	2807	3200	3026	3081	3004	694	3713	2374	2275	2407	2850	3658	3317	2176	2249	2424	2453	3885	4883	3341	2206	2600	2933	3822	4148	2482	2974	5949	7823	10756	4659	7898	3713	10164	7628	3672	7595	6343	11696
Bacteria	Bacteria	Proteobacteria	Azohydromonas	3666	4892	6064	2880	3064	1677	1433	2705	4779	5304	4964	2135	1415	4019	2497	1429	1883	2000	2123	2524	1975	1500	1794	1996	2995	3491	1656	1871	1859	2142	1388	2957	1926	2325	4122	4463	5045	2600	4961	2313	5708	4043	2841	3995	4422	6900
Bacteria	Bacteria	Proteobacteria	Hyphomonas	3637	3833	6498	4891	5058	2602	2514	3863	12738	14598	7318	5305	4295	3790	4269	2657	3253	3830	3976	3918	2840	3278	3179	3473	4571	4409	2903	2976	5062	3641	3626	3487	3111	3631	4631	5217	5090	3360	7264	3085	6248	4388	4436	4847	5021	7439
Bacteria	Bacteria	candidate division NC10	Candidatus Methylomirabilis	3612	4669	5136	5337	4039	3902	3705	3267	2628	3001	3148	4670	927	4328	3282	3699	3588	4076	4173	3004	2376	2305	3281	3652	4706	6101	3144	3001	2753	3409	3511	3724	2708	4297	4081	9120	9708	6734	8165	4121	10255	7463	3442	7570	6286	10109
Bacteria	Bacteria	Proteobacteria	Ochrobactrum	3602	3794	5945	4442	4329	3479	3527	6432	4823	4688	4200	6420	3220	4244	4076	3116	3488	4341	4450	4060	4465	4791	3495	4034	4516	4583	3088	3211	4506	4573	7228	4123	5129	4152	4117	2951	3152	2707	3944	2651	4735	4827	4489	3468	3262	4684
Bacteria	Bacteria	Actinobacteria	Candidatus Microthrix	3574	2649	4155	3121	3270	3109	3000	6356	3254	2952	3033	6875	1261	4008	3215	3463	2579	5041	3886	3692	3848	5174	2744	3480	3270	3238	1997	3325	1891	5234	3190	4257	5848	3336	6085	1726	2258	1847	2619	1642	2304	2801	1542	2484	1538	1909
Bacteria	Bacteria	Proteobacteria	Neisseria	3560	3650	5691	3477	4053	2849	2637	3604	6075	6347	4798	4495	2205	3286	3685	2671	3031	4112	4100	3260	2543	2795	3020	3486	4461	4819	2560	2880	3590	3308	4081	2656	3002	3448	3383	3823	4194	2940	4062	2507	5164	4584	4595	3795	3857	5494
Bacteria	Bacteria	Proteobacteria	Erythrobacter	3555	3542	6311	3819	5102	2531	2064	3901	19622	14651	10388	5157	4698	3356	4518	2828	3067	4547	3519	2856	2430	2620	3212	3407	4731	4057	2129	3441	4743	3124	6698	2637	3223	3248	3472	4960	4693	2829	6519	4200	6233	4719	5233	4088	4587	6791
Bacteria	Bacteria	Proteobacteria	Methylocella	3531	3462	5588	3994	3943	3116	3801	7430	2325	2471	2471	6466	2124	4045	3460	2625	3336	4324	3951	3170	3314	3951	3146	3871	4578	4819	3169	2699	3584	4296	4792	3960	5100	3681	3534	1684	2182	1794	2338	1338	2556	3142	3027	2181	2121	2606
Bacteria	Bacteria	Proteobacteria	Pajaroellobacter	3520	706	2112	2106	2417	721	1156	2173	1154	1081	940	1439	280	808	1808	661	1279	1367	1095	1052	740	729	1128	2278	3167	2626	1445	843	617	1474	1067	593	534	577	820	495	524	841	784	421	740	957	1384	627	659	827
Bacteria	Bacteria	Cyanobacteria	Moorea	3486	4331	4544	3696	3493	3352	3063	3442	3366	3083	2996	4280	1212	3417	3065	2876	3212	3842	4178	2712	2205	2718	3228	3221	4205	6026	3008	2842	2733	2830	3535	3393	3070	3349	3947	4836	5911	3574	5180	2663	6096	5034	3866	5357	4172	6762
Bacteria	Bacteria	Proteobacteria	Filomicrobium	3477	2923	3799	2264	1792	1876	2500	6096	3451	2904	3952	3912	1164	4601	1885	1282	1519	1824	2343	3934	3871	4471	1866	2327	2189	2076	2013	1485	2509	3964	3917	5140	5071	2900	5348	2555	3492	1488	4396	1942	5336	4369	1731	2704	2134	2875
Bacteria	Bacteria	Planctomycetes	Gimesia	3476	2678	4148	2741	3247	1784	1966	2788	4322	3959	4800	3521	906	2309	2610	1680	2468	3328	2626	2486	2060	2106	2110	2522	3285	3287	2169	1942	1881	2595	2273	2565	2354	1815	2365	4852	5602	2811	5010	2726	6632	3840	1858	5090	4407	7319
Bacteria	Bacteria	Proteobacteria	Plesiocystis	3424	1632	2075	1607	2156	978	1039	2237	4947	3687	2684	1641	417	1610	1418	792	1106	1296	1329	1656	1147	888	1130	1289	2023	1814	1221	1304	1023	2104	1051	1819	1297	1448	3259	4667	4387	2849	6038	2220	7937	3935	2686	4933	4493	11977
Bacteria	Bacteria	Actinobacteria	Bifidobacterium	3421	2788	4530	3335	3583	3365	3224	4188	3344	3633	3092	6900	1671	3182	3365	4745	3511	6210	4844	2984	2923	3661	3148	3350	4047	4437	2633	3713	2845	3176	4125	3188	4282	3493	3670	2966	3725	2892	3402	2066	3756	4289	3871	3564	2807	3948
Bacteria	Bacteria	Firmicutes	Geobacillus	3420	3154	4521	3597	3745	3570	3406	3496	2215	2379	2112	5306	970	2612	3231	3957	3077	4999	4693	2501	2399	2613	3773	3393	4146	5041	2884	3505	2494	2701	3787	2702	3055	2912	2791	3799	4285	3298	3877	2135	4736	3829	3502	4101	3025	4625
Bacteria	Bacteria	Actinobacteria	Dactylosporangium	3411	1933	6148	2563	2329	3337	3549	5816	3685	3592	1864	6778	1202	3013	2756	4139	3918	5620	6134	2550	2771	4226	4864	2752	3636	3987	2338	2723	2038	2075	4517	3043	6375	3411	2598	954	2185	1553	1693	1241	1705	4382	5736	1978	1704	1556
Bacteria	Bacteria	Verrucomicrobia	Roseimicrobium	3373	2714	3576	2771	2865	1823	1913	3046	8311	7716	5216	3076	1278	2722	2516	1464	2138	1749	2351	2573	2003	2169	1854	2441	2990	3210	2485	2041	2779	2836	2222	3157	2980	2743	2653	4373	5288	2647	4775	2603	6517	3369	2004	4927	4389	8042
Bacteria	Bacteria	Cyanobacteria	Planktothrix	3367	4732	4731	3891	3876	3147	3261	3406	3870	3301	3160	4368	1169	3370	3078	3248	3147	3875	4042	2651	2078	2343	3128	3418	4172	5391	2798	2727	2642	2849	3714	3179	2777	2814	3790	4891	6187	4150	5219	3048	6757	5459	3600	5776	4353	7288
Bacteria	Bacteria	Proteobacteria	Acidocella	3344	3141	6330	3695	4392	3232	3755	8114	2341	2282	2369	8422	3252	3563	3705	3126	3606	5235	4205	3078	3288	4097	3114	3875	4220	4418	2532	3343	4279	4173	4793	3814	5868	3527	3108	1243	1496	1976	1831	1326	1954	4749	3531	1970	2223	2384
Bacteria	Bacteria	Planctomycetes	Fuerstia <Bacteria>	3344	2955	3523	2466	2989	1772	2194	3372	3853	4057	4000	3483	979	2609	2330	1714	2570	2867	2892	2687	2230	2388	2009	2363	2935	3033	2320	1939	1859	2963	2694	3225	2736	2114	2961	5496	6133	2876	5937	2998	7533	4347	1867	5702	5203	8537
Bacteria	Bacteria	Deinococcus-Thermus	Thermus	3277	2977	4009	4173	3832	3833	3502	3240	2754	3529	2768	5023	934	2453	3044	3903	3222	4605	4706	2588	2222	2379	3454	3631	4185	4914	2634	3309	2253	2889	3449	2841	3103	3147	3324	4423	5688	4063	5058	2592	5739	5096	3628	5055	3765	5587
Bacteria	Bacteria	Cyanobacteria	Synechococcus	3246	3386	4205	3204	3034	2441	2525	3346	2772	2878	2794	3916	1036	3054	2813	2540	2584	3261	3645	2670	2319	2611	2619	3007	3738	4556	2705	2494	2774	2944	3565	3023	2907	2713	3388	4247	4880	3414	4660	2452	5860	4311	2973	4302	3841	5962
Bacteria	Bacteria	Proteobacteria	Methylovirgula	3236	2981	5630	3981	5978	3824	3955	8330	2018	1987	2175	7827	7351	3582	5426	3495	3677	13002	3302	3066	3450	4284	2874	4913	4333	4175	2402	3862	3416	4424	4426	3432	5259	3208	2633	935	1127	1360	1621	1049	1625	2527	2172	1374	1495	1588
Bacteria	Bacteria	Cyanobacteria	Anabaena	3218	4731	5031	4293	4202	3422	3328	3771	3327	3173	2920	5115	1531	3339	3458	4229	3328	4339	4699	2568	2286	2907	3330	3582	4778	5632	2903	3148	2787	2707	4138	3251	3070	3127	3083	4971	5591	3664	4733	2627	6197	5162	3753	4776	3999	6500
Bacteria	Bacteria	Actinobacteria	Kineosporia	3218	2589	4817	3405	3257	5580	5784	7499	1417	2189	1890	10971	1860	4023	4410	6577	4764	9663	6185	3276	3793	6638	4557	4896	4855	5679	2995	4848	3258	3595	7287	3954	8469	3930	3837	1425	2355	2103	2360	1460	2202	3754	2954	2220	1585	1635
Archaea	Bacteria	Euryarchaeota	Methanosarcina	3216	3023	4191	4367	3663	4136	4397	3642	1755	2100	2113	5426	1010	2570	3267	4351	3843	4886	5362	2447	2508	2594	3750	4072	4586	6568	3186	2978	2989	2589	4811	2924	3202	3213	2358	3254	4630	4391	3858	2379	4976	4042	2967	4143	3121	5452
Bacteria	Bacteria	Proteobacteria	Azospira	3200	5122	4851	3457	2892	1509	1396	2308	19505	12546	17005	1898	1105	4588	2453	1107	1832	1512	2654	3336	1794	1592	1921	2224	3087	3974	1748	1490	1845	2658	1464	2930	2236	2801	3839	6478	6570	3445	6153	2774	7482	5167	3070	4747	5539	10341
Bacteria	Bacteria	Proteobacteria	Aeromonas	3178	3570	4945	2704	3185	2034	1971	2803	4265	4300	4596	3377	1554	2979	2714	1980	2393	3099	3291	2758	2195	2668	2127	2673	3375	3794	2352	2080	2488	2838	3166	2722	2411	2552	3308	4109	4588	2791	4605	2557	5567	3852	3450	3910	3940	6268
Bacteria	Bacteria	Actinobacteria	Acidithrix	3152	2333	5080	3828	4543	6267	5954	8561	1614	2236	1665	12103	2007	3281	5370	6944	5539	10376	6856	3395	4043	6339	4708	5955	5567	6268	3128	4891	2931	4342	7339	3368	7749	3771	3011	467	661	1283	1246	919	888	2512	2896	1381	951	853
Bacteria	Bacteria	Proteobacteria	Bdellovibrio	3140	1906	3187	2025	2005	1177	1150	2163	2455	2460	2724	2138	1441	2227	1848	1038	1252	1453	1754	1912	1728	1663	1612	1753	2727	2370	1370	1527	2970	2118	1707	2416	1434	1687	2990	3624	4279	2911	4125	2343	5258	3453	2879	4018	3266	5515
Bacteria	Bacteria	Proteobacteria	Pusillimonas	3115	3564	5527	3985	2917	2135	2251	3957	4408	3822	3175	3783	1213	4134	2656	2218	2436	2992	3073	3247	2553	5466	2409	2855	3662	3817	2086	2189	2577	3556	2783	3610	3387	2952	3442	5625	5853	4329	6399	3142	7840	8537	5474	5695	4741	7415
Bacteria	Bacteria	Actinobacteria	Nakamurella	3109	2210	4197	2805	2791	4987	4413	6969	1552	1785	1641	9333	1799	3607	3827	5222	3889	7998	5001	2704	3308	5778	3983	4155	3943	4851	2577	4155	2662	3320	5831	3662	8235	4197	3891	621	1267	1340	1596	1061	1337	2977	2824	1459	1149	1181
Bacteria	Bacteria	Actinobacteria	Hamadaea	3084	1369	4412	2063	1665	1794	2093	3612	3285	2850	1673	3478	697	2102	1640	2446	2489	3129	3442	1892	1890	2793	2517	1846	2617	2543	1642	1544	1528	1297	2798	2322	4194	2612	2849	935	2275	1344	1788	976	1342	3743	5738	1751	1395	1229
Bacteria	Bacteria	Planctomycetes	Planctomicrobium	3066	2443	3433	2227	2772	1635	1756	2706	4435	4707	4292	2945	762	2017	2190	1525	2334	2473	2563	2387	1758	2297	1900	2110	2868	2864	2156	1910	1628	2356	2062	2374	2188	1877	2399	3844	4310	2530	4360	2436	5555	3945	1759	4422	3718	5717
Bacteria	Bacteria	Cyanobacteria	Cyanothece	3064	3358	3946	3316	3046	2413	2472	2964	2262	2502	2402	3585	897	2900	2539	2305	2559	2961	3313	2313	1917	2143	2750	2777	3528	4418	2415	2322	2340	2523	2912	2949	2564	2783	2690	3751	4305	2978	3939	2229	5064	4320	2917	4182	3213	5385
Bacteria	Bacteria	Proteobacteria	Acidithiobacillus	3059	3021	4744	3863	3377	3602	3901	5581	2035	2581	2414	5936	1925	3205	3292	2950	3334	4201	4425	3107	3185	4095	3258	3685	4090	4747	3074	2556	4026	4073	4756	3635	4889	3739	2752	2035	2490	2316	2998	1709	3187	3717	2832	2611	2402	3475
Bacteria	Bacteria	Proteobacteria	Methylotenera	3058	3747	4505	4069	4149	1617	1455	2019	7600	8905	3820	2550	3100	3852	3415	1247	2827	1802	2189	4721	1756	1831	2098	4450	3119	3721	1724	2329	9812	4544	3834	3098	2157	3206	3898	6716	6996	9437	10505	19695	14473	9177	28768	11498	16089	16951
Bacteria	Bacteria	Actinobacteria	Saccharomonospora	3053	2255	4530	3265	3236	5253	4997	6400	1455	1843	1474	10252	1677	2940	3698	6312	4230	9053	5339	2733	3160	5396	4158	4425	4511	5093	2839	4609	2831	3197	5625	3300	7040	3437	2930	1347	1841	1708	2038	1301	2021	3457	2985	1894	1441	1716
Bacteria	Bacteria	Proteobacteria	Azorhizobium	3046	3221	5583	3432	3591	2561	2861	6603	3398	3035	2685	5620	2294	4273	3292	2211	2899	3684	3029	3565	3623	4685	2870	3575	3892	3873	2347	2709	3419	4266	4068	3847	4888	3183	3989	1962	2296	1637	2516	1538	2674	3253	3787	2294	2298	2632
Bacteria	Bacteria	Actinobacteria	Sphaerisporangium	3021	2133	4296	3751	3253	5930	5955	6553	1665	2198	1401	11412	1747	2972	4275	7594	5050	10351	7124	2767	3568	5617	4754	4868	4606	6237	3238	4677	3084	2960	7243	3136	7899	3904	2463	726	1265	1595	1402	942	1311	2794	3009	1349	1238	1232
Bacteria	Bacteria	Proteobacteria	Escherichia	2996	2778	4437	3105	3358	2504	2662	3342	5110	4816	4143	4315	2685	2645	3147	2680	3105	3636	3670	2967	2791	3818	2813	3274	3670	4656	2819	2431	3724	3073	6185	2760	3205	2979	3301	2843	3380	2299	3688	2072	4166	3840	4995	3070	3368	5318
Bacteria	Bacteria	Firmicutes	Desulfofundulus	2981	2578	4013	3924	3766	4602	3452	3358	1923	2963	2498	5155	906	2497	2892	4819	3294	5465	5162	2543	2304	2211	4114	3644	4247	5943	2720	3570	2245	2928	4110	3074	3105	3437	2409	4531	5470	4673	5122	2768	6508	4829	3501	5056	4167	6515
Bacteria	Bacteria	Proteobacteria	Candidatus Endolissoclinum	2977	2942	4765	2982	2934	2153	2794	5479	2759	2728	2870	5517	1420	3755	2522	1760	2208	2707	2606	3208	2875	3147	2227	2843	3121	3034	1863	2713	2727	5002	3257	3428	4089	2968	3376	2302	2675	2730	3453	3755	4849	3758	2075	2606	2639	3405
Bacteria	Bacteria	Planctomycetes	Schlesneria	2966	2381	3585	2521	2659	1727	1859	2728	3022	2508	2801	3192	933	2011	2116	1759	2136	2829	2435	2105	1923	2061	2024	2106	2761	2729	1824	1771	1914	2475	2301	2372	2203	1759	2143	3322	3867	2174	3983	2107	5154	3118	1368	3820	3226	5142
Bacteria	Bacteria	Proteobacteria	Tepidicaulis	2960	3621	6235	4012	3376	2124	2450	2762	2508	2398	2458	4308	1996	3950	3101	2113	2807	2454	3670	3257	2633	3149	2599	3083	4802	4570	2903	1985	3880	3862	2525	3703	2285	3535	2352	3635	3645	3863	3794	2301	5728	4074	4033	3951	3797	5262
Bacteria	Bacteria	Bacteroidetes	Adhaeribacter	2958	2153	2789	1358	1971	1039	685	1661	4833	4401	3384	1468	705	1592	1320	835	1109	1164	1446	1767	1171	1190	1012	1006	1912	1859	1489	1194	1087	1375	801	1535	1243	1634	2540	2577	3716	1765	3007	1415	3692	2408	1338	2531	2300	3887
Bacteria	Bacteria	Proteobacteria	Syntrophobacter	2932	3257	3805	3233	2862	2379	2603	2928	1791	2093	2378	3265	983	3174	2375	2150	2474	2760	3284	2394	2088	2289	2306	2805	3560	4482	2599	1918	2316	2647	2725	2994	2717	2773	2670	2980	4310	2888	3789	2242	4743	3594	2156	3552	3095	4968
Bacteria	Bacteria	Actinobacteria	Cryobacterium	2900	2412	4039	3151	3100	4092	3872	5704	1572	2215	1659	7256	1631	3019	3205	4722	3549	6380	4899	2632	2932	6382	3526	3498	3656	4544	2687	3982	2793	3091	5826	3074	5884	3288	2958	1161	1591	1563	1803	1231	1724	2986	3073	1619	1302	1458
Bacteria	Bacteria	Proteobacteria	Oceanicola	2896	2867	3856	2647	3110	1966	1986	3127	3718	3514	3285	3963	1502	2943	2613	2142	2240	3273	2807	2547	2266	2614	2153	2438	3272	3507	2246	2533	2504	2965	2667	2801	2826	2854	3174	3581	4249	2954	4000	2078	4489	4255	3097	3943	3282	4353
Bacteria	Bacteria	Proteobacteria	Rhodobacter	2889	2874	4365	3221	3378	2476	2711	4568	3684	3644	3499	4901	1937	3187	2881	2497	2464	3211	3227	2838	2631	3235	2298	2871	3448	3763	2330	2525	3008	3412	3672	3039	3681	3111	3116	2442	3015	2198	3124	1872	3827	3710	3500	3014	2952	4053
Bacteria	Bacteria	Proteobacteria	Alcanivorax	2888	3087	4115	2593	2906	1882	1989	2863	5032	4785	6537	3571	2025	3188	2556	2118	1919	2887	2770	2597	1966	1998	2228	2528	2896	3187	1781	2134	2556	2706	3016	2583	2253	2258	3008	4462	4769	3001	5196	2851	5564	4260	3672	4041	4549	7212
Bacteria	Bacteria	Actinobacteria	Thermobifida	2887	2178	4954	3704	3572	7543	7094	8572	993	1534	1229	14075	2132	3475	4946	7965	5628	12213	7083	3088	3992	6814	5026	5761	5314	6974	3562	5395	3663	3519	8937	3347	8608	3922	2106	330	735	1208	1068	872	928	2610	2246	1045	868	824
Bacteria	Bacteria	Verrucomicrobia	Terrimicrobium	2883	2155	3023	2549	1923	2323	2502	6155	3560	3148	2555	4117	2055	5345	2473	1556	1925	2047	2782	2963	2701	3047	2243	2718	2995	3325	2513	1594	3789	4820	4643	6043	8640	3257	2682	1970	2409	1416	2110	1275	2681	1966	1207	2141	1870	2919
Bacteria	Bacteria	Proteobacteria	Ruegeria	2876	3200	4530	3013	2787	2577	2786	4261	2404	2284	2912	4284	1337	3409	2828	2210	2443	2930	3263	2776	2651	2948	2616	3151	3645	4039	2475	2137	2870	3024	3920	3120	3531	2663	2798	2237	2715	2349	2911	1584	3232	3134	2406	2691	2742	3659
Bacteria	Bacteria	Proteobacteria	Bauldia	2872	3507	4869	3699	4048	4007	2921	5443	2410	2462	2391	7515	1282	3342	3639	4058	3561	6817	4121	3654	3934	5132	2933	4355	4620	4806	3601	3708	3098	4927	4096	3856	4628	4143	3483	1892	2434	2544	2859	1788	3923	2890	2171	4974	2717	3141
Bacteria	Bacteria	Proteobacteria	Arenimonas	2871	3659	6078	3115	3733	2574	1738	2710	72492	134108	32249	3583	2950	3391	3902	1952	2632	3638	3221	4171	2409	2351	2557	3158	4018	4001	2206	2060	3307	3306	2763	2665	3201	3732	3206	5781	5892	3830	9285	5432	7137	4807	5457	5354	7492	9696
Bacteria	Bacteria	Actinobacteria	Mycolicibacter	2856	1761	3559	2337	2009	2979	2761	4851	1266	1539	1980	5320	1339	2280	2378	3156	2560	4794	3742	2227	2316	3566	2318	2715	3736	3235	1894	2457	2159	3090	4168	2249	3948	2510	2415	973	1268	1431	1613	982	1584	1821	1627	1489	1135	1597
Bacteria	Bacteria	Actinobacteria	Catelliglobosispora	2844	1540	3799	2050	1764	2722	2641	4154	8520	6903	1552	5227	850	2553	2117	3362	2667	4590	3668	2352	2445	4190	2660	2159	2726	3216	1866	2048	1564	1805	2852	2055	4794	2430	2754	1292	2745	1754	2511	1332	3054	3857	3494	2019	1541	1832
Bacteria	Bacteria	Bacteroidetes	Aquimarina	2812	2572	3095	1711	2331	1238	1178	1790	5514	4451	5692	1778	956	1875	1808	1162	1547	1521	1873	2012	1440	1565	1399	1480	2452	2548	1612	1358	1765	1779	1870	2101	1553	1810	3161	3190	3908	2237	3774	1910	4512	3082	1889	2875	2861	5304
Bacteria	Bacteria	Actinobacteria	Patulibacter	2767	2634	3786	2728	3444	4108	3232	7323	1654	2032	1788	7903	1830	4133	3294	3230	2850	8048	4159	3918	3975	7524	3052	3290	3557	2924	2675	6333	2116	5423	3676	5288	8156	3251	8575	1652	2787	2943	3492	2223	3068	3487	1609	3427	1814	1602
Bacteria	Bacteria	Actinobacteria	Collinsella	2753	2570	3811	2822	2848	1995	2156	2620	2842	3018	2690	3332	919	2470	2373	2479	2259	3128	3062	2529	1983	2168	2210	2432	3240	3567	2184	2293	1982	2766	2476	2468	2279	2473	2888	3305	3839	2671	3530	1859	4255	3711	2976	3457	3118	4364
Bacteria	Bacteria	Bacteroidetes	Rhodothermus	2744	2684	3025	2380	2526	1659	1672	2021	2672	2603	2319	2742	612	2571	2140	1784	1772	2362	2246	2231	1605	1612	1822	1908	2608	2775	1744	1882	1848	2233	1816	2796	1903	2134	2971	6522	8046	4842	6728	3489	8217	5674	3486	5889	4989	8944
Bacteria	Bacteria	Bacteroidetes	Salinibacter	2704	2648	3255	2166	2486	1806	2139	2458	2152	2209	2343	3022	746	2588	2339	1766	2108	2544	2857	2151	1677	1862	2209	2350	2908	3315	2370	1912	1822	2239	2211	2713	2351	2281	2675	4985	5615	3648	4640	2234	5769	4213	4089	4514	3631	6171
Bacteria	Bacteria	Actinobacteria	Janibacter	2607	1392	2237	1377	1406	1782	1526	3342	1285	1464	1827	3432	791	2012	1752	1836	1600	3364	2133	1472	1703	2500	1670	1641	2075	2171	1260	3802	1371	1897	2214	2296	3351	2406	3657	1522	1881	1502	1842	1235	1795	1986	1184	1599	1215	1528
Bacteria	Bacteria	Verrucomicrobia	Haloferula	2604	2241	2531	1824	1724	1133	1031	1826	13511	10391	6311	1859	1201	2258	1793	881	1345	1114	1559	1938	1553	1446	1296	1592	2029	2195	1804	1415	2103	1848	1685	2429	1930	1790	2307	4181	5901	2890	5280	2512	6883	3386	2274	5030	4874	7954
Bacteria	Bacteria	Proteobacteria	Salmonella	2581	2434	4106	3187	3275	2600	2364	2907	4093	4310	3758	4218	2219	2354	3049	2394	2728	3548	3082	2505	1999	2864	2487	3047	3318	3910	2254	2664	4494	2607	10418	2297	2329	2865	2404	2607	3016	1902	3826	2500	3314	3059	3857	2922	2877	4510
Bacteria	Bacteria	Bacteroidetes	Cnuella	2563	2756	3544	675	1617	529	187	1044	9046	9601	7346	806	437	1747	863	355	506	571	882	2776	1563	1684	625	480	1562	1243	1165	998	787	1315	271	1855	1273	1644	5465	3057	4822	1691	3852	1824	4332	2371	1506	2061	2382	5931
Bacteria	Bacteria	Proteobacteria	Alicycliphilus	2562	2830	4360	2652	2412	1542	1644	2818	3825	4275	3547	2635	1569	2830	2200	1549	1851	2246	2537	2156	1722	2409	1663	2096	2628	2906	1576	1726	1764	2301	4311	2194	2077	2326	2900	3319	4017	2015	3697	1836	4374	3311	3047	3272	3279	4541
Bacteria	Bacteria	Proteobacteria	Methylorubrum	2480	2521	3986	2500	2614	1953	2527	5391	2367	2380	2184	4761	1486	2939	2278	1664	1976	2578	2620	2471	2515	3244	1999	2329	2931	2873	1884	2105	2635	3302	3087	3026	4017	2604	3255	1493	1925	1434	2077	1336	2233	2657	2675	1922	1831	2220
Bacteria	Bacteria	Proteobacteria	Pseudoalteromonas	2474	2562	3552	2559	2703	1846	1805	2445	7070	5737	4288	2851	1860	2529	2368	1707	2199	2350	2857	2241	1971	1724	1734	2352	2861	3000	1855	1846	2290	2243	2519	2177	2140	2079	2534	4303	4442	2722	4357	2351	5273	3355	2544	3749	3508	5865
Bacteria	Bacteria	Firmicutes	Desulfosporosinus	2459	2476	3478	3450	3251	3403	2893	2566	1604	2339	2079	4505	766	2084	2485	4069	3010	4807	4102	2076	1789	2043	3275	3051	3707	4912	2318	3356	1963	2009	2862	2145	2312	2642	2012	2644	3577	2956	3179	1942	3962	3495	3227	3278	2577	4251
Bacteria	Bacteria	Proteobacteria	Caenispirillum	2456	3000	4838	3071	3088	2204	2772	4355	2737	2793	2053	5185	1625	2859	2581	2414	2271	2795	2601	1943	1881	2212	2428	2890	3389	3495	1879	2251	3101	2690	2972	2248	3167	2749	1775	1510	1616	1680	1948	1123	2179	3411	3500	2044	2195	2730
Bacteria	Bacteria	Proteobacteria	Salipiger	2455	2327	3811	2612	2844	1986	1826	2931	2968	2936	2504	3651	1269	2497	2324	1987	2160	2738	2388	2151	1773	2347	2030	2315	2792	3087	1834	2216	2333	2440	2548	2332	2469	2578	2152	2514	2872	2029	2883	1689	2999	2946	2793	2659	2395	3477
Bacteria	Bacteria	Chloroflexi	Dehalococcoides	2441	1862	2970	2814	2843	2690	2618	2101	1427	1655	1514	4009	604	1544	2452	3669	2687	4336	4192	1612	2128	1913	3078	2611	3195	4115	1976	2806	1591	1606	2661	1525	1952	1905	1621	1885	2379	2376	2117	1188	2785	2679	2580	2467	1731	2492
Bacteria	Bacteria	Proteobacteria	Ectothiorhodospira	2441	2731	4985	3674	3532	2759	3064	2943	3814	3505	3350	5883	2712	2857	3760	3025	3518	4323	4368	2794	2563	2619	2936	4430	3992	4353	2279	2478	4996	2939	3066	2256	2532	3782	2608	3418	3273	2604	3707	1876	3629	3856	3641	2837	3651	4265
Bacteria	Bacteria	Actinobacteria	Aeromicrobium	2435	1542	3172	2314	2489	3210	2998	4328	1085	1242	1133	6446	1094	2213	2831	4085	2805	5845	3565	2035	2297	3530	2395	2888	3161	3357	1917	3404	1817	2419	4062	2528	4754	2552	2612	1997	3207	1305	1932	960	1679	2918	1889	1744	1020	1299
Bacteria	Bacteria	Bacteroidetes	Emticicia	2425	1433	2477	1025	1983	806	622	1483	5601	4633	4393	1204	601	1295	1184	466	909	772	1018	1848	1041	1169	773	897	1703	1515	1228	811	955	1274	618	1394	1004	1271	2074	2193	2931	1212	2369	1171	2642	1976	1255	1718	1815	3618
Bacteria	Bacteria	Proteobacteria	Tistlia	2425	2797	4443	3235	2930	2283	2454	3537	2694	2565	2223	4411	1362	3098	2367	2136	2377	2539	3036	2288	2045	2478	2095	2663	3292	3694	2030	2035	2920	2698	2846	2470	2893	3114	1889	2019	2081	1948	2273	1288	2679	3368	3268	2369	2420	2962
Bacteria	Bacteria	Proteobacteria	Pseudogulbenkiania	2424	3434	4040	2738	2242	1499	1436	2032	2359	2954	2879	2112	1274	3079	2204	1151	1741	1660	2492	1901	1450	1351	1852	2151	2652	3573	1526	1399	1655	2014	1884	1989	1879	2270	2411	2789	3234	2374	3237	1767	3801	3408	1836	2944	2893	4222
Bacteria	Bacteria	Proteobacteria	Desulfatibacillum	2417	2218	2843	2182	2362	1848	1759	2192	1676	1782	1852	2357	738	2104	1909	1648	1962	1957	2428	1945	1574	1559	1714	2015	2878	3152	1813	1623	2095	1923	2161	2153	1748	1923	2263	3993	4245	2750	3665	2047	4617	3204	2196	3553	3148	4868
Bacteria	Bacteria	Proteobacteria	Ancylobacter	2416	2401	3681	2490	2398	2046	2132	4234	2724	2460	2121	3946	1483	2897	2294	1628	1988	2567	2433	2337	2428	3034	2198	2504	2767	2766	1761	1868	2369	2969	7412	2763	3192	2354	2527	1818	1899	1256	1913	1073	2234	2481	1999	2130	1924	2269
Bacteria	Bacteria	Cyanobacteria	Chroococcidiopsis	2416	3012	3357	2871	2591	2362	2305	2494	1959	2191	1698	3417	938	2232	2127	2550	2303	3108	3189	1848	1638	1830	2378	2404	3105	4251	2124	2247	1961	2112	2804	2374	2530	2561	2364	3096	4012	2916	3538	1865	4271	3849	2569	3484	2885	4475
Bacteria	Bacteria	Proteobacteria	Dechloromonas	2402	3687	4165	3402	2108	1488	1680	1624	2909	3081	2846	1693	937	3369	1994	1044	1533	1655	2048	2111	1431	1293	1830	2049	2627	3424	1357	1398	1548	1989	1390	2411	1490	2197	2779	3642	3986	2857	3884	1955	5067	3569	2057	3173	3643	6625
Bacteria	Bacteria	Proteobacteria	Piscinibacter	2349	3719	3600	1977	1660	919	773	1432	3350	3253	3575	1014	522	2667	1398	706	822	933	1272	1480	1208	899	1001	1257	2046	1897	915	1117	1009	1325	657	1988	1195	1525	3375	6188	4787	2311	5400	2888	5964	3148	1982	4486	4452	7483
Bacteria	Bacteria	Proteobacteria	Nitratireductor	2318	2690	4152	2870	2559	2174	2428	3965	3401	3124	2510	4386	1531	3039	2509	2137	2268	3012	2534	2505	2411	3002	2340	2757	3161	3237	2097	2320	2515	2863	3158	2992	3192	2741	2993	2422	2980	1838	2979	1676	3538	3348	3200	2638	2456	3365
Bacteria	Bacteria	Actinobacteria	Clavibacter	2302	1849	2942	2163	2247	2392	2409	3311	1735	1899	1796	4735	1159	2093	2349	2892	2407	4255	3017	1836	2036	3215	2234	2453	2969	3196	1781	2642	1650	2017	3472	2141	2967	2119	2396	1906	2407	1769	2331	1232	2579	2757	2321	2231	1693	2325
Bacteria	Bacteria	Firmicutes	Thermaerobacter	2298	2154	2999	3819	3493	4991	3237	2461	1792	3387	1794	5181	752	1957	2445	4867	2783	5241	4683	1792	1774	2072	3673	3124	3265	4769	2316	3615	1954	2033	3529	2249	2377	2993	2127	2844	3543	2965	2949	1724	4062	3484	2662	3331	2358	3650
Bacteria	Bacteria	Proteobacteria	Rhodovulum	2289	2012	3252	2213	2251	1713	2060	4130	2129	1934	1834	3794	1236	2615	1959	1544	1925	2352	2207	2482	2563	3137	1905	2081	2536	2612	1738	1666	2207	2689	2835	2600	3217	2305	3349	1628	2042	1243	1987	1356	2619	2427	2545	1836	1496	2446
Bacteria	Bacteria	Proteobacteria	Pleomorphomonas	2279	2156	3445	2454	2625	1932	2067	3595	2981	2355	2413	4196	1530	2279	2315	2010	2095	2952	2783	2295	2325	2472	1929	2398	2942	3169	2139	2148	2464	2705	3577	2326	3020	2528	2168	1379	1741	1490	2005	1259	2493	2626	2479	2149	2066	2415
Bacteria	Bacteria	Proteobacteria	Shewanella	2279	2330	3342	2139	2223	1715	1695	1901	6982	5870	4463	2591	1702	2179	2181	1827	1973	2612	2721	2011	1906	1429	1752	2232	2758	3151	1743	1590	2236	1944	2575	2062	1632	2049	2370	3940	3954	2793	4339	2375	4907	3356	3055	3423	3652	5786
Bacteria	Bacteria	Firmicutes	Desulfotomaculum	2266	2013	2994	3564	3211	3555	3587	2309	1405	1807	1804	4712	762	1789	2554	4133	2846	4790	4424	1796	1748	1727	3303	3025	3252	4105	1973	3160	1686	1938	2782	2046	2201	2356	2484	3279	3875	3282	3536	1961	4432	3662	2675	3573	2777	4315
Bacteria	Bacteria	Proteobacteria	Microbulbifer	2247	2591	3482	1842	2014	1322	1387	2034	4541	4726	8220	2286	1516	2618	1913	1253	1663	1718	1950	2323	1701	1433	1401	1761	2340	2586	1675	1332	1884	2193	4184	2524	1716	1833	2644	5377	4930	2904	5336	3559	6493	3140	2727	4429	5732	11623
Bacteria	Bacteria	Proteobacteria	Azotobacter	2233	2734	3745	2595	2291	1686	1962	2607	2479	2471	2726	2657	1221	2491	2211	1498	2323	2465	3063	1882	1653	1709	1920	2173	2729	3672	1911	1555	2057	1896	2838	2111	2214	2051	2166	2518	2947	1922	2782	1385	3299	2704	1907	2426	2401	3839
Bacteria	Bacteria	Proteobacteria	Labrys	2233	2075	3132	2232	2473	2898	1797	4971	2212	1653	1585	3574	2530	2787	2521	1470	1955	3272	2234	2194	2096	2321	1826	2422	2697	2529	1664	1726	2358	3704	2845	2670	4761	2432	2201	997	1372	1220	1764	1219	1896	2180	2068	1599	1610	1826
Bacteria	Bacteria	Bacteroidetes	Alistipes	2187	2153	2751	1972	2279	1488	1422	1892	4283	4551	3038	2391	828	2040	1787	1497	1618	2106	1997	1871	1337	1424	1530	1794	2292	2527	1566	1624	1674	1899	1562	1993	1469	1868	2110	3110	3513	2388	3390	1792	4010	2844	4618	3079	3012	4675
Bacteria	Bacteria	Chloroflexi	Ardenticatena	2184	2197	2906	2865	2577	2301	2353	1904	1526	1868	1425	3441	522	1933	2164	2850	2365	3448	3382	1581	1527	1675	2438	2506	3155	3836	1776	2525	1686	1701	2358	2046	1764	2049	1967	3498	4759	3362	3690	2122	5000	3693	2453	4167	3145	5631
Bacteria	Bacteria	Bacteroidetes	Terrimonas	2153	1802	2539	481	1260	479	172	873	8715	9675	7495	578	357	1131	555	272	444	457	518	1876	1094	1063	387	455	1409	890	854	498	580	925	262	1378	874	1286	3035	1941	2493	1186	2734	1243	3449	2383	1875	1392	1895	5955
Bacteria	Bacteria	Proteobacteria	Blastomonas	2146	1560	3364	2096	2646	1487	1215	2631	5193	4463	3644	2843	3754	1520	2602	1374	1610	2715	1985	1439	1265	1409	1638	1851	2404	2261	1258	1612	2909	1705	4278	1251	1695	1702	1298	1690	1706	1186	2219	1506	2309	1903	2558	1584	2031	2670
Bacteria	Bacteria	Actinobacteria	Corynebacterium	2124	1686	2787	2064	2081	2167	2604	3047	2164	2128	1855	4471	933	2010	2132	2843	2169	3823	2965	1829	1962	2860	2263	2289	2556	2991	1770	2602	1753	2039	2658	2227	3103	2243	3158	1520	2018	1714	2048	1171	2208	2343	2627	2099	1454	2096
Bacteria	Bacteria	Chloroflexi	Caldilinea	2120	2863	3054	2840	2178	2707	2476	2826	1240	1527	1320	4224	759	2308	2246	3306	2334	3874	3394	2056	1990	2246	2621	2590	3255	4143	2346	2366	2779	2343	3671	2670	2890	2764	2094	3518	4644	2804	3493	1977	4755	3650	3404	4062	2892	4847
Bacteria	Bacteria	Cyanobacteria	Gloeobacter	2115	2344	2957	2247	2625	1776	1774	2066	1403	1616	1584	2645	556	1600	1929	1992	1931	2476	2757	1357	1132	1333	1813	2070	2782	3393	1657	1741	1343	1660	1977	1603	1534	1689	1856	1512	2624	1987	2574	1303	3130	2798	1560	2444	1902	2852
Bacteria	Bacteria	Armatimonadetes	Fimbriimonas	2068	2421	3220	2514	2692	1873	1530	1569	1590	1723	2467	3151	967	1899	2970	2031	2678	2937	2705	1708	1265	1352	2106	2412	3710	4018	1648	2578	1496	1626	1713	1804	1187	1451	1854	2249	3590	2694	3062	1925	3819	3387	1889	3461	3176	5660
Bacteria	Bacteria	Proteobacteria	Lautropia	2064	2954	3485	2677	2005	1474	1616	1916	2380	2539	2722	2066	712	2608	1702	1311	1402	1554	1993	1845	1508	1346	1654	2073	2350	3045	1202	1552	1565	2072	1810	2108	1670	2334	2712	3123	3817	2208	3465	1646	4185	3413	2000	3138	2776	4510
Bacteria	Bacteria	Proteobacteria	Niveispirillum	2063	2624	4459	2914	3183	1837	2288	3106	3369	3017	2497	4531	2912	2471	2688	2362	2188	2722	2487	1997	1832	1851	1975	2704	3197	3162	1844	2087	3321	2457	2638	2223	2614	2648	2011	1887	1937	1811	2281	1327	2661	2965	3553	2390	2493	3263
Bacteria	Bacteria	Firmicutes	Streptococcus	2058	1507	2710	1901	2139	1975	1861	2539	2001	2203	1735	3464	894	1820	1823	2301	1866	3356	2499	1775	1633	2158	1978	2047	2226	2849	1639	2036	1638	2068	2620	1773	2400	2144	2313	1826	2212	1707	2143	1341	2401	2373	2437	2016	1661	2545
Bacteria	Bacteria	Planctomycetes	Phycisphaera	2052	3393	3342	1392	1803	830	485	1651	1754	1999	3804	1525	330	3722	1411	519	1124	1252	1301	2159	1406	1580	1336	1024	2125	1633	1187	1793	995	1839	539	3804	1213	1137	3394	6394	8951	6350	9703	4844	11359	6912	4499	8493	7822	11650
Bacteria	Bacteria	Proteobacteria	Hydrocarboniphaga	2029	2178	3483	2740	2886	1806	1819	2266	5355	5066	3762	2739	4343	2039	2756	1994	1951	2839	2289	1841	1568	1315	1653	2859	3017	3271	1298	1812	2106	2046	2060	1621	1624	2240	2225	4753	3951	1492	5178	2218	6732	3035	3335	4044	3758	8513
Bacteria	Bacteria	Cyanobacteria	Oscillatoria	2027	2584	2816	2152	2165	1663	1675	1942	3162	2307	1508	2376	584	1892	1705	1757	1890	2041	2234	1411	1097	1408	1930	1667	2487	3040	1823	1560	1530	1600	2121	2002	1760	1733	2055	2596	3482	2430	3211	1740	4167	3332	2180	3102	2511	4265
Bacteria	Bacteria	Proteobacteria	Pseudacidovorax	2026	2427	3740	1734	1766	1005	831	1719	4656	5198	3822	1419	1066	2052	1612	929	1365	1411	1584	1584	1163	1237	928	1295	1933	1737	1051	1164	1542	1486	12511	1547	1350	1775	2477	2479	3169	1495	3126	1508	3665	2369	2007	2666	2711	3838
Bacteria	Bacteria	Proteobacteria	Sphaerotilus	2025	1901	3260	1781	2492	1336	945	1772	3336	3426	2475	1877	1571	1658	1847	1033	1251	1805	1187	1324	960	1039	1118	1575	1880	1735	923	1332	1435	1447	1154	1246	1111	1415	1908	2296	2252	1255	2466	1445	2584	1745	2095	1847	2355	3215
Bacteria	Bacteria	Proteobacteria	Acidihalobacter	2022	2053	4014	2766	2722	1980	2141	1982	2814	2387	2495	4060	1996	2257	2900	2160	2640	3348	3126	1967	1968	1847	2149	3005	3000	3024	1800	1924	3841	2003	2112	1708	1761	2814	1962	2416	2386	1871	2615	1275	2756	3084	2861	2160	2510	3231
Bacteria	Bacteria	Cyanobacteria	Aphanizomenon	2011	1524	1924	1543	1525	1184	1239	1365	2373	2485	2430	1907	577	1209	1382	1279	1230	1729	1573	1209	1002	972	1288	1387	1777	2154	1223	1234	1378	1428	1614	1357	1213	1388	1411	1680	1867	1318	2073	1292	2141	2013	1601	1759	1464	2283
Bacteria	Bacteria	Proteobacteria	Aurantimonas	2007	2095	3258	2027	2168	1663	1771	3343	2464	2439	2190	3426	1369	2262	1887	1564	1727	2183	2238	2005	1820	2234	1677	1950	2360	2478	1651	1617	2030	2383	2155	2348	2602	2042	2461	1908	2126	1668	2201	1263	2697	2658	2456	2211	1967	2435
Bacteria	Bacteria	Proteobacteria	Sutterella	2003	2680	4017	3824	3000	2286	2781	2051	2511	2749	2222	3051	1347	2132	2744	1904	1946	2817	2693	1904	1535	1589	2050	3467	3280	3624	1581	2041	2219	2147	2236	2126	1550	2745	2248	2900	3442	1703	2664	1379	2870	2531	1935	2393	2257	3277
Bacteria	Bacteria	Proteobacteria	Yersinia	1996	1521	2678	1708	2630	1389	1735	2190	1991	1923	1613	3114	1333	1476	1651	1581	2351	2115	1963	1619	1297	1464	1477	2009	2291	2311	1524	2526	12883	1706	3476	1406	1670	1504	1567	1374	1760	1285	1776	1147	2250	2223	3683	1817	2210	2525
Bacteria	Bacteria	Proteobacteria	Phaeospirillum	1991	2170	3647	2401	2587	1809	1970	3382	2097	1766	1707	4496	1510	2011	2195	1870	1833	2448	2348	1697	1867	2199	1767	2232	2747	2526	1385	1879	2374	2268	2515	1904	2498	2326	1934	1225	1544	1279	1532	876	1741	2625	2943	1638	1628	2302
Bacteria	Bacteria	Proteobacteria	Nitrosovibrio	1989	2174	15356	981	468	393	403	467	2446	1587	759	6258	266	1054	408	644	3584	676	591	621	2210	2737	7498	775	2260	1089	2912	350	826	481	2126	744	1634	1769	640	796	1034	683	915	577	1107	2760	852	789	1004	2183
Bacteria	Bacteria	Bacteroidetes	Arenibacter	1969	1694	1983	1128	1537	872	716	1050	3987	3038	2927	1151	405	1343	1025	742	1059	1097	1076	1429	917	971	815	860	1595	1629	1348	835	1074	1289	812	1443	1041	1294	1928	2569	2887	1422	2516	1194	2811	2023	1228	2057	2051	4066
Bacteria	Bacteria	Proteobacteria	Pelobacter	1968	2373	2682	1540	1568	958	997	1576	1734	1668	1935	1652	514	1993	1310	987	1078	1295	1701	1399	1230	1077	1132	1217	1881	1981	1210	1036	1053	1562	1191	1700	1383	1455	2143	2841	3521	2243	3133	1468	3816	2740	1566	3032	2575	3933
Bacteria	Bacteria	Bacteroidetes	Flavipsychrobacter	1959	477	1997	763	651	647	243	425	1025	1146	1048	768	2244	295	704	440	576	419	297	488	413	252	920	410	797	547	347	495	1396	276	344	321	304	443	478	356	522	259	576	380	633	451	401	354	427	886
Bacteria	Bacteria	Proteobacteria	Derxia	1955	1984	3198	2958	2189	1765	2339	1978	1387	1797	1638	2521	944	1628	2080	1505	1651	2137	1922	1247	1095	1067	1799	2731	2784	3077	976	1519	1679	1569	2011	1482	1448	2431	1649	1198	1492	1062	1441	871	1569	1600	1535	1185	1255	1774
Bacteria	Bacteria	Planctomycetes	Isosphaera	1936	1409	1820	1266	1601	1028	1300	2222	1120	1101	1452	2424	728	1248	1280	1291	1816	1857	1920	1167	1134	1389	1132	1399	1711	1486	1266	1206	879	1398	1898	1381	1682	1145	1284	2273	2571	1247	1913	1043	2736	1895	913	2094	1897	2877
Bacteria	Bacteria	Proteobacteria	Sulfitobacter	1881	1724	2687	1817	1771	1466	1507	3099	2110	1871	1873	2751	1028	2172	1730	1365	1509	1981	1971	1899	1937	2154	1392	1687	2027	2242	1322	1341	1675	2186	2216	2446	2600	1950	2541	2060	2318	1319	2266	1186	2522	2449	1855	1883	1762	2545
Bacteria	Bacteria	Proteobacteria	Pigmentiphaga	1857	2119	2928	2387	1722	1368	1516	2235	2212	2000	1693	2281	769	2619	1615	1508	1363	1878	1809	1859	1542	1622	1419	1783	2276	2533	1335	1436	1597	1987	1734	1991	1738	1683	2255	3522	3483	2614	3362	1615	4518	3682	2386	3393	2835	4356
Bacteria	Bacteria	Proteobacteria	Cellvibrio	1855	1587	2685	1366	1625	932	834	1407	6314	6438	9642	1443	2178	1611	1370	947	1127	1428	1177	1629	978	903	924	1215	1782	1938	1045	985	1398	1628	8520	1623	1029	1320	1982	5306	4596	2596	5596	5779	6276	2320	4286	4344	6408	14519
Bacteria	Bacteria	Proteobacteria	Thalassobaculum	1850	2139	3273	2493	2131	1505	2021	2941	1767	1852	1891	3638	765	2387	1675	1731	1476	2002	1997	1820	1690	1986	1568	2004	2218	2346	1405	1451	2043	2249	2298	2168	2330	2111	2079	1933	2110	1839	2271	1327	2753	3095	2136	2271	2084	2728
Bacteria	Bacteria	Proteobacteria	Methylobacillus	1840	3228	3009	2541	2251	929	842	1239	4439	5112	2728	1243	809	3155	1836	675	1564	967	1806	2636	1334	1194	1318	2129	2183	2802	1293	1185	4351	2392	6900	2449	1705	2132	2961	4583	4339	4958	6188	9954	8081	5267	11625	6413	7340	8580
Bacteria	Bacteria	Proteobacteria	Gluconobacter	1839	1514	2966	1759	2250	1475	1605	3193	1562	1724	1484	3766	1936	1551	1941	1371	1581	2184	1875	1585	1796	1869	1516	1814	2245	1903	1272	1657	2150	1936	2031	1484	2374	1617	1488	1127	1155	871	1211	887	1497	1808	1867	1243	1278	1780
Bacteria	Bacteria	Chloroflexi	Candidatus Chloroploca	1836	2731	2372	3061	2232	2619	3408	2085	1150	1415	1244	4498	755	1796	2078	4050	2632	4258	3898	1508	1444	1816	3178	2375	2669	3445	2045	2416	1740	1680	2759	2302	2357	2153	2183	3122	3976	2677	3690	2131	4362	4365	4606	3645	2464	3816
Bacteria	Bacteria	Actinobacteria	Alloactinosynnema	1830	1586	2734	2375	2108	3025	2955	3507	901	1270	1191	5916	873	2029	2188	3588	2481	5025	3476	1629	1911	2819	2602	2580	2648	2965	1733	2852	1618	1966	3228	2144	3945	2254	2208	1237	1654	1270	1557	988	1544	2284	2502	1619	1059	1411
Bacteria	Bacteria	Proteobacteria	Gluconacetobacter	1829	761	2001	1037	1952	912	728	2320	937	1070	838	2525	1060	856	1460	798	977	1617	944	957	956	1085	952	1144	1305	1042	726	1529	1229	1284	1333	1117	1764	1377	664	412	642	662	777	554	827	1108	1474	703	713	796
Bacteria	Bacteria	Proteobacteria	Desulfobulbus	1827	1939	2620	2001	1947	1445	1513	2000	2048	2126	2244	2080	683	2138	1593	1279	1543	1796	1876	1607	1327	1508	1475	1679	2251	2448	1690	1288	1365	1724	1561	1820	1532	1564	1918	2937	3681	2543	3249	1697	4129	2600	1635	3036	2608	4311
Bacteria	Bacteria	Actinobacteria	Acidothermus	1825	1335	2899	2344	2409	4538	4003	5041	638	906	844	7984	1156	2218	3163	4998	3365	7065	4252	2098	2481	4342	3222	3682	3441	4509	2224	3283	2287	2534	5584	2216	5080	2549	1788	222	440	882	800	577	629	1865	1970	828	545	469
Bacteria	Bacteria	Proteobacteria	Blastochloris	1823	1801	3107	1684	1563	1222	1417	3331	1383	1320	1475	2638	847	2162	1460	1002	1479	1842	1504	1813	1787	2407	1444	1614	2078	2042	1270	1140	1397	1993	1779	2171	2334	1300	2045	972	1356	722	1357	693	1442	1556	1438	1227	1030	1181
Bacteria	Bacteria	Firmicutes	Sulfobacillus	1820	1539	3029	3479	2860	4789	4256	3532	909	1504	1198	6759	1223	1577	3055	5585	3354	6468	4905	1597	2075	2406	3944	3454	3581	4862	2074	3359	1976	1997	4520	1790	3345	2466	1219	1069	1328	1293	1267	894	1564	2164	2468	1195	1067	1512
Bacteria	Bacteria	Actinobacteria	Modestobacter	1813	1465	2884	2180	2072	2911	2899	3854	888	1364	1013	5454	927	2061	2298	3447	2383	4852	3384	1628	1862	2965	2323	2480	2763	2974	1663	2687	1571	2053	3240	2094	4074	2082	2054	742	1260	1404	1260	813	1139	2059	1951	1153	849	898
Bacteria	Bacteria	Cyanobacteria	Cylindrospermum	1803	2622	2297	2249	2236	1655	1910	2026	1423	1533	1205	2836	624	1639	1954	2551	1937	2843	2564	1253	1023	1214	1848	1878	2387	3043	1483	1846	1628	1427	2386	1704	1510	1720	1718	2486	3067	2194	2689	1469	3643	2981	1939	2928	2234	3660
Bacteria	Bacteria	Bacteroidetes	Fibrisoma	1780	1608	1988	1019	1426	960	784	1144	4445	3016	3257	1422	361	1195	1114	819	996	1124	1247	1177	811	1005	864	1103	1581	1796	1007	949	860	1028	693	1208	911	1087	1702	2101	2667	1289	2174	1147	2589	2066	1137	1939	1840	2987
Bacteria	Bacteria	Cyanobacteria	Acaryochloris	1774	1536	2053	1655	1570	1685	1901	2106	1452	1413	1184	2489	821	1313	1395	1831	1638	2159	2267	1344	1244	1377	1649	1698	2055	2756	1702	1394	1693	1587	2546	1770	2011	1580	1552	1742	2033	1315	1787	1180	2411	2406	2568	1702	1684	2583
Bacteria	Bacteria	Cyanobacteria	Pseudanabaena	1762	1812	2287	1798	1877	1514	1612	2242	1606	1853	1495	2438	679	1602	1630	1551	1620	2050	2116	1426	1216	1329	1569	1696	2130	2672	1424	1448	1341	1604	1825	1710	1648	1633	1502	2285	2766	1727	2410	1484	3158	2486	1460	2542	1988	3159
Bacteria	Bacteria	Proteobacteria	Melittangium	1751	1008	1425	1206	1307	921	764	1219	1725	1552	1028	1211	405	817	1122	798	907	974	1163	898	758	655	992	1029	1342	1709	834	990	806	992	1066	986	812	1087	1533	1396	1878	1351	2126	955	2890	2441	1715	2611	1743	2539
Bacteria	Bacteria	Chloroflexi	Thermoflexus	1748	1867	2386	2553	2149	2279	2141	1703	1047	1341	1070	3262	585	1664	1887	2893	2182	3254	3133	1535	1479	1563	2522	2283	2457	3477	1935	2186	1664	1696	2218	1801	1688	1875	1548	2709	4092	2608	2778	1746	3723	3164	2735	3299	2374	3722
Bacteria	Bacteria	Proteobacteria	Pseudooceanicola	1744	1710	2379	1665	1896	1190	1241	1805	2356	2365	1999	2311	1192	1711	1506	1389	1332	1895	1571	1547	1305	1546	1415	1434	1801	1930	1206	1398	1537	1524	1673	1520	1731	1665	1756	2029	2198	1550	2182	1358	2460	2149	2210	2181	1938	2793
Bacteria	Bacteria	Actinobacteria	Marmoricola	1741	1478	2483	1767	1820	3208	2603	4639	916	1081	1032	6114	1040	2590	2290	3054	2491	5417	3011	1856	2243	3881	2283	2363	2471	2927	1746	3078	1813	2367	3143	2543	4902	2221	2761	1010	1693	1062	1329	845	1206	2016	1081	1206	823	935
Bacteria	Bacteria	Actinobacteria	Rothia	1740	1397	2459	1669	1917	2039	1874	2583	1755	1785	1374	4016	1002	1568	1820	2163	2011	3519	2129	1593	1606	2354	1776	1938	2331	2316	1392	2230	1479	1913	2305	1626	2585	1930	1744	1098	1280	992	1407	851	1517	1885	1777	1273	1121	1476
Bacteria	Bacteria	Proteobacteria	Syntrophus	1737	2274	2462	1997	1544	1432	1455	1745	1768	1694	1871	1758	470	1901	1424	1423	1464	1616	2220	1849	1396	1386	1404	1580	2171	2893	1901	1153	1603	1646	2101	1756	1537	1603	1870	3269	3701	2252	3013	1632	3768	2636	1795	3009	2289	3993
Bacteria	Bacteria	Cyanobacteria	Trichodesmium	1735	1731	2972	1799	2080	1333	1201	2226	3273	3058	2772	2895	1300	1890	1825	1374	1464	2428	1623	1671	1451	1669	1588	1795	2273	2106	1253	1675	1890	1916	1775	1615	1806	1692	1771	1764	2245	1230	2717	1362	3006	2481	2638	1963	1945	2767
Bacteria	Bacteria	Proteobacteria	Ketobacter	1704	1121	2044	937	807	493	476	1166	1491	1544	3994	1011	878	1098	915	454	690	642	807	990	728	585	723	839	1225	1093	599	557	912	1040	898	957	697	722	1409	1245	1363	935	1646	908	1695	1138	1598	1330	1556	2293
Bacteria	Bacteria	Actinobacteria	Cellulosimicrobium	1696	1201	2193	1442	1486	1805	1878	2764	1531	1674	1345	3709	625	1642	1564	2154	1714	3484	2161	1432	1519	2282	1553	1860	1887	2026	1237	2072	1217	1623	2357	1769	2963	1724	2667	951	1354	1037	1464	776	1339	1788	1625	1335	902	1161
Bacteria	Bacteria	Firmicutes	Cohnella	1696	1564	2428	1862	1889	1830	1685	1997	1496	2024	2018	2741	728	1351	1768	1980	1672	2555	2074	1352	1275	1498	1726	1920	2072	2276	1463	1848	1457	1676	1963	1490	1727	1662	1807	2012	2862	3009	2580	1705	3135	2407	2158	2583	2138	3651
Bacteria	Bacteria	Actinobacteria	Actinoalloteichus	1692	1356	2305	2092	1795	2837	2704	3297	1095	1173	956	5267	846	1737	2004	3329	2196	4361	3150	1477	1712	2459	2279	2407	2392	2609	1500	2453	1456	1515	2905	1633	3162	1671	1435	702	1255	906	1060	634	1094	1814	1809	1125	863	1063
Bacteria	Bacteria	Bacteroidetes	Prevotella	1689	1106	1865	1135	1484	931	828	1068	2698	2930	2029	1643	696	1101	1148	991	1019	1408	1173	1167	845	924	1014	1099	1476	1476	1035	1060	1189	1304	1159	1075	898	1154	1374	1803	2061	1454	2024	1316	2606	2032	1740	1856	1863	2882
Bacteria	Bacteria	Proteobacteria	Paucibacter	1686	2088	2510	1392	1576	760	544	1382	2142	2853	2344	1020	816	1654	1168	634	755	931	855	1050	698	609	750	964	1465	1320	618	860	782	1086	523	1072	803	1045	1821	1866	2201	1065	2164	1077	2472	1581	1319	1769	2236	2923
Bacteria	Bacteria	Proteobacteria	Lamprocystis	1683	2153	2536	1673	1408	1114	1149	1506	1821	1754	1786	1463	469	2076	1409	1031	1254	1406	1812	1271	1154	1098	1241	1563	1986	2577	1235	1085	1160	1427	1142	1651	1380	1418	1602	1849	2328	1483	2262	1151	2651	2179	1335	2082	1987	2944
Bacteria	Bacteria	Firmicutes	Flavonifractor	1681	1626	2281	1847	2139	1565	1585	1821	1916	1914	2040	2476	693	1443	1727	1770	1643	2336	2063	1418	1220	1238	1602	1686	2336	2683	1458	1683	1472	1662	1799	1373	1437	1611	1659	2057	2692	1880	2283	1275	2859	2395	2040	2272	2091	2956
Bacteria	Bacteria	Bacteroidetes	Sphingobacterium	1681	1073	1943	873	1528	643	458	1102	4352	3691	3306	1273	862	837	891	593	771	918	810	1268	798	728	726	824	1216	1208	690	1125	1064	905	1236	954	713	1001	1392	1606	1835	961	1915	1090	2167	1396	1384	1416	1715	2755
Bacteria	Bacteria	Proteobacteria	Chitinimonas	1675	2645	2598	1817	1628	990	852	1256	2459	2233	2171	1257	1874	2266	1580	842	1009	1467	1364	1434	1021	1000	1073	1327	1786	2344	821	1113	986	1377	1126	1535	1326	1453	1900	2398	2984	1811	2385	1077	3059	2516	1562	2180	2209	3411
Bacteria	Bacteria	Proteobacteria	Kiloniella	1665	1912	2788	2219	1923	1291	1737	2092	1942	1763	1798	2953	793	1990	1703	1795	1513	1794	2086	1653	1398	1715	1550	1948	2247	2346	1385	1353	1769	1738	1762	1530	1655	2034	1232	1829	1653	1383	1802	1159	2178	2641	2617	1948	2050	2844
Bacteria	Bacteria	Actinobacteria	Verrucosispora	1665	940	2414	1358	1423	1870	1753	2494	1319	1499	950	3303	575	1371	1518	2195	1783	3058	2323	1226	1301	2020	1675	1613	2026	2220	1258	1449	1132	1221	2272	1408	2693	1528	1457	719	1217	916	1085	600	1091	1920	2616	1155	823	1071
Bacteria	Bacteria	Planctomycetes	Thermogutta	1653	1651	1935	1320	1680	861	1218	1347	1477	1550	2262	1809	436	1440	1259	923	1159	1438	1453	1481	1016	1317	1129	1339	1517	1578	1254	1103	1003	1440	1034	1736	1296	1101	1331	2740	3132	2061	3239	1664	4005	2615	1691	3073	2832	4491
Bacteria	Bacteria	Proteobacteria	Hoeflea	1647	1819	2860	2076	1789	1371	1527	2604	2413	2093	1857	2635	1388	2055	1738	1364	1444	2059	1826	1742	1598	1834	1445	1644	1964	2213	1375	1382	1676	1856	1964	1847	2195	1851	1935	1672	1791	1456	2045	1133	2727	2321	1907	1958	1808	2567
Bacteria	Bacteria	Bacteroidetes	Rufibacter	1636	1601	1684	669	957	454	398	904	2904	2846	2313	768	391	1171	817	346	528	474	710	1234	750	888	572	553	1060	1093	814	820	952	893	578	1089	886	919	1995	1913	2520	1324	2337	1264	2744	1834	1435	1746	1647	3052
Bacteria	Bacteria	Proteobacteria	Caldimonas	1617	2002	2551	1499	1481	1010	886	1244	2723	2684	2212	1158	667	1826	1150	734	833	1064	1108	1153	934	776	824	1125	1662	1846	848	946	943	1202	856	1247	824	1189	2080	2142	2455	1401	2188	1259	2705	2004	1216	1923	1945	3239
Bacteria	Bacteria	Bacteroidetes	Ohtaekwangia	1613	641	1091	671	1532	614	219	1297	22297	13880	16981	627	428	509	813	335	423	416	559	1730	497	386	336	568	1002	789	556	481	1458	1053	380	728	556	897	1668	4803	4675	549	3866	1835	4343	1430	1725	2125	3084	7326
Bacteria	Bacteria	Bacteroidetes	Parabacteroides	1613	1218	1890	1102	1513	848	802	1063	2224	2087	1613	1486	840	1004	1287	1020	1052	1308	1206	1351	1424	1564	874	1055	1432	1636	955	1053	1035	1056	952	1059	1094	1171	1093	1249	1665	1172	1955	974	1940	1620	1510	1436	1589	3174
Bacteria	Bacteria	Chloroflexi	Levilinea	1606	1716	1934	1865	1674	1685	1714	1535	1372	1306	876	2314	400	1425	1645	2065	1609	2342	2420	1588	1212	1134	2008	1953	2610	2797	1486	1430	1612	1443	2105	1850	1376	1569	1477	3320	4014	2179	3355	1906	4687	2913	2297	3694	2886	6202
Bacteria	Bacteria	Chloroflexi	Longilinea	1594	2023	2097	2244	1978	2117	2277	1507	1049	1083	915	3133	478	1489	2018	2660	2167	3356	2860	1309	1136	1112	2266	2118	2678	3389	1591	1923	1528	1320	2219	1968	1584	1689	1314	3381	4867	2233	3293	2162	4669	3207	3017	3970	3207	6599
Bacteria	Bacteria	Cyanobacteria	Microcoleus	1570	1800	2035	1581	1765	1232	1400	1508	1481	1669	1505	2148	481	1434	1466	1692	1404	1696	1782	1239	987	1086	1355	1491	1905	2249	1179	1391	1314	1442	1379	1545	1262	1481	1665	2241	2839	1858	2438	1393	3041	2419	1438	2751	2064	3409
Bacteria	Bacteria	Proteobacteria	Herminiimonas	1566	1772	2307	1537	1434	926	1059	1002	2793	2191	1998	1393	854	1550	1068	916	812	1132	1179	1047	955	792	1035	1517	1518	1794	709	819	1073	1211	990	1147	998	1518	1397	2165	2146	1438	1975	1127	2534	2029	1778	1718	1924	2992
Bacteria	Bacteria	Verrucomicrobia	Akkermansia	1563	906	1516	1138	1092	1000	998	1929	2987	2580	1725	1516	695	1212	1247	724	901	962	1235	1286	1223	1247	947	1110	1543	1592	1373	832	1826	1826	1862	1598	1842	1508	1040	1406	1664	976	1701	903	1954	1169	1009	1374	1429	2421
Bacteria	Bacteria	Actinobacteria	Actinocatenispora	1557	985	2385	1695	1441	2633	2464	2873	767	1004	676	4537	647	1369	1653	2843	2071	3997	3120	1198	1502	2203	2256	2062	2038	2301	1239	1897	1240	1354	2577	1487	3166	1580	1329	345	728	687	797	550	620	2083	3412	798	493	509
Bacteria	Bacteria	Proteobacteria	Bradymonas	1553	581	931	513	810	268	296	828	1056	980	772	571	90	620	413	277	337	489	348	513	450	372	466	425	729	588	494	501	357	733	309	561	432	512	1039	1221	1661	918	1451	655	1625	1254	1197	1526	1174	1925
Bacteria	Bacteria	Proteobacteria	Paracraurococcus	1540	1505	2902	1708	1976	1196	1521	3398	1109	1074	1218	3594	780	1725	1463	1351	1348	1753	1496	1281	1284	1425	1293	1648	1747	1779	937	1569	1416	1659	1579	1634	2144	1471	1290	813	889	787	1076	706	1123	1917	1410	1056	1061	1277
Bacteria	Bacteria	Actinobacteria	Ferrimicrobium	1537	991	2513	1929	2046	3291	3028	3719	567	955	679	6041	892	1429	2375	4193	2794	5258	3286	1582	1742	2993	2517	2982	2868	3257	1595	2507	1585	1711	3917	1334	3793	1791	1206	186	231	462	456	332	343	950	1253	530	334	276
Bacteria	Bacteria	Bacteroidetes	Maribacter	1516	1275	1620	703	1274	562	481	1078	3033	2385	2463	869	478	1057	808	532	675	722	731	1267	854	905	615	732	1149	1140	1059	705	854	1158	714	1178	1058	1088	1660	1541	2143	1128	1825	929	1954	1421	853	1429	1536	2679
Bacteria	Bacteria	Proteobacteria	Alteromonas	1499	1529	2201	1510	1503	984	865	1319	2570	2427	2445	1579	1504	1482	1345	972	1143	1399	1454	1460	1139	1064	1068	1281	1663	1889	1171	1002	1327	1433	1601	1303	1028	1308	1593	2558	2421	1611	2429	1375	2938	2026	1463	2051	2237	3686
Bacteria	Bacteria	Proteobacteria	Pseudovibrio	1480	1629	2126	1306	1320	957	1146	1901	1491	1742	1579	2170	811	1464	1422	1041	1104	1387	1365	1508	1232	1535	1050	1374	1705	1635	1126	978	1407	1584	1853	1589	1542	1325	1452	1571	1519	1198	1975	1083	2544	2464	1370	1730	1488	2119
Bacteria	Bacteria	unknown	Thermobaculum	1479	1252	1953	1557	1618	1403	1338	1290	587	874	666	2799	344	929	1523	2370	1498	2678	2222	833	875	1179	1854	1555	1911	2228	1154	1896	1045	912	1743	1023	1366	1141	893	1159	1799	1272	1247	686	1607	1894	2176	1794	941	1399
Bacteria	Bacteria	Proteobacteria	Methylococcus	1470	1766	2008	1495	1213	976	1132	1486	1836	1625	1483	1557	745	1846	1159	898	1150	1156	1446	1401	984	1105	1087	1248	1631	2028	1279	744	1131	1354	1408	1582	1287	1429	1552	1844	2421	1729	2398	1243	2656	2216	1556	1936	2104	2927
Bacteria	Bacteria	Proteobacteria	Candidatus Methyloumidiphilus	1469	1334	1887	1454	1166	927	1270	1504	663	778	950	1385	467	1092	1234	910	1265	1110	1621	879	774	1074	1048	1319	1779	2195	906	866	965	1036	1203	998	987	926	1260	751	1016	860	923	518	1351	1138	632	752	844	1640
Bacteria	Bacteria	Bacteroidetes	Siphonobacter	1461	1038	1538	739	1128	637	511	927	3709	3066	2504	1060	465	893	740	629	696	761	769	1068	628	720	548	614	1045	979	768	704	996	797	701	871	660	873	1373	1436	1927	965	1664	907	2097	1516	1142	1354	1358	2719
Bacteria	Bacteria	Proteobacteria	Sulfurifustis	1453	1579	2304	2136	1722	1457	1514	1556	2375	1983	1499	1966	1145	1872	1545	1389	1387	1814	1889	1508	1297	1014	1285	1645	1925	2384	1227	1241	1245	1593	1427	1817	1346	1702	1532	2843	3095	2408	3286	1480	3599	2944	2022	2971	2584	4192
Bacteria	Bacteria	Actinobacteria	Friedmanniella	1443	1025	1568	1340	1088	1568	1842	2604	500	725	638	3538	623	1377	1398	2166	1470	2958	1879	1015	1161	2198	1372	1591	1486	1657	977	1930	1144	1383	2045	1575	3557	1403	1506	754	1057	762	939	530	799	1404	990	906	521	570
Bacteria	Bacteria	Verrucomicrobia	Prosthecobacter	1442	1408	1424	1074	1157	852	780	1396	5938	5244	3222	1413	622	1248	1127	703	899	940	888	1200	882	970	769	1002	1270	1319	1062	793	1332	1365	1348	1407	1322	1049	1522	2411	2769	1376	2805	1250	3744	1993	1095	2558	2644	4624
Bacteria	Bacteria	Proteobacteria	Rhodoblastus	1427	1143	2084	1306	1470	1279	1357	3550	861	886	1011	2611	924	1653	1223	975	1025	1582	1579	1504	1869	2099	1171	1453	1465	1575	1356	1061	1810	2081	2371	1782	2906	1364	1551	498	850	648	1031	509	1049	1497	1344	721	793	1037
Bacteria	Bacteria	Verrucomicrobia	Cephaloticoccus	1423	1006	1601	1433	1000	848	647	1112	5607	8017	5079	1316	1393	793	1211	660	780	963	1163	774	539	567	1203	1084	1308	1146	506	643	1072	853	1137	798	956	900	819	1586	1611	670	1682	1083	1972	1165	1087	2026	2030	3803
Bacteria	Bacteria	Proteobacteria	Aquincola	1421	2143	2461	1096	1486	766	569	1049	3034	2713	1849	907	702	1637	1164	567	689	978	879	970	723	621	651	853	1326	1154	524	827	601	894	388	1079	819	925	1743	2351	2405	1144	2366	1220	2762	1734	1235	1949	2335	3295
Bacteria	Bacteria	Proteobacteria	Beggiatoa	1418	1567	2009	1726	1456	1231	1405	1507	1909	2000	1374	1899	792	1496	1335	1379	1340	1519	1711	1150	975	1038	1197	1421	1791	2285	1140	979	1301	1391	1532	1447	1359	1432	1551	2038	2473	1581	2228	1220	2790	2253	1924	2016	2054	3075
Bacteria	Bacteria	Actinobacteria	Euzebya	1412	1232	1851	1479	1456	1549	1322	2079	1262	1253	1086	2753	483	1513	1393	1728	1253	2248	1704	1298	1356	2120	1281	1304	1530	1712	917	1663	850	1706	1197	1618	2055	1409	2336	1284	1962	1347	1697	937	1659	1612	1051	1772	1044	1620
Bacteria	Bacteria	Proteobacteria	Methylophilus	1406	2057	2295	1669	1492	898	760	1128	3183	3004	2114	1134	960	1983	1217	683	1022	1063	1304	1473	852	720	1045	1378	1591	1867	954	1009	2117	1639	1437	1424	1077	1431	1948	2572	2479	2270	2975	3317	3790	2748	4499	2956	3737	4716
Bacteria	Bacteria	Proteobacteria	Methylovulum	1397	1801	2125	1514	1372	918	1011	1485	1601	1705	1960	1510	916	1618	1260	956	1258	1218	1670	1304	910	987	988	1249	1671	1978	1193	847	1101	1375	1387	1353	1309	1359	1376	1263	2044	1434	1985	1049	2303	1892	1075	1791	1693	2436
Bacteria	Bacteria	Proteobacteria	Acuticoccus	1384	1990	2336	1599	1321	1166	1438	2451	1613	1506	1533	2530	595	1916	1229	1059	1079	1485	1270	1438	1365	1682	1173	1372	1570	1775	1098	1208	1190	1644	1747	1898	2007	1492	1881	1558	2005	1300	1736	972	2141	1953	1275	1835	1556	2030
Bacteria	Bacteria	Actinobacteria	Kocuria	1366	950	1678	1321	1239	1824	1704	2627	801	894	764	3761	608	1204	1329	2083	1523	3030	2143	1117	1186	1933	1577	1702	1860	2238	1056	1743	964	1297	2127	1431	2642	1385	1592	869	1054	893	1106	565	1056	1271	1144	908	698	959
Bacteria	Bacteria	Actinobacteria	Actinophytocola	1365	926	2097	1610	1439	2311	2289	2852	839	1054	799	4543	666	1466	1528	2474	2006	4002	2666	1226	1460	2343	1717	1969	2034	2425	1342	1748	1192	1494	2676	1535	2998	1460	1009	336	698	700	742	543	743	1372	968	723	650	635
Bacteria	Bacteria	Actinobacteria	Ornithinimicrobium	1349	920	1364	896	896	1403	1099	2094	1003	801	816	2563	402	1320	1121	1301	1111	2114	1470	985	1135	1896	1231	1160	1363	1493	929	1691	995	1257	1672	1490	2445	1346	1871	701	1257	898	1096	648	1112	1440	785	1265	867	998
Bacteria	Bacteria	Firmicutes	Desulfallas	1341	1288	1780	1804	1763	1790	1294	1308	704	1096	989	2197	497	1123	1398	1908	1339	2107	1971	1119	875	1079	1521	1515	1775	2319	1194	1485	992	1051	1512	1229	1243	1342	1125	1683	2291	1664	1905	1148	2507	2009	1310	2015	1640	2616
Bacteria	Bacteria	Actinobacteria	Actinopolyspora	1339	935	2000	1369	1328	2109	1953	2546	601	829	683	4108	717	1366	1610	2246	1727	3376	2301	1230	1347	2193	1515	1809	1972	2197	1190	1636	1256	1337	2526	1318	3011	1376	1363	612	960	842	1037	569	906	1423	1628	866	681	869
Bacteria	Bacteria	Proteobacteria	Luteimonas	1334	2105	5149	1017	1320	1010	635	1195	4923	6739	3473	1223	1594	1173	1310	689	979	1078	1457	1284	816	1489	906	1092	1374	1430	674	1013	960	1062	1504	939	1145	1079	1215	1971	1957	1171	2638	975	2150	1906	2032	1722	1702	2686
Bacteria	Bacteria	Proteobacteria	Methylomicrobium	1326	1446	1778	1275	1474	882	827	1495	1262	1340	1286	1364	713	1245	1097	786	922	1282	1445	1270	1092	1191	959	1196	1560	1676	935	885	1257	1200	1740	1284	1134	1188	1814	2023	2154	1252	2036	982	2600	1904	2022	1911	1645	2802
Bacteria	Bacteria	Proteobacteria	Andreprevotia	1325	1786	2257	1525	1171	906	787	947	1677	1714	1687	1043	687	1648	1187	636	872	943	1091	1150	750	623	985	1213	1390	1859	674	804	839	1098	1037	1023	838	1209	1497	1301	1712	1040	1497	809	1757	1607	1042	1408	1584	2389
Bacteria	Bacteria	Bacteroidetes	Sporocytophaga	1319	689	917	522	836	361	220	1318	2602	2048	2034	594	673	563	509	318	359	440	436	717	765	375	393	414	693	644	423	322	548	671	388	578	481	486	840	977	1293	610	1148	576	1259	790	576	977	1014	1944
Bacteria	Bacteria	Proteobacteria	Porphyrobacter	1312	1099	2042	1042	1454	713	662	1184	4825	3815	3087	1595	1495	1025	1269	830	848	1133	947	940	614	783	904	1069	1440	1333	663	1039	1414	927	2920	786	859	980	1025	1288	1465	963	1828	1168	1873	1447	1626	1298	1429	2154
Bacteria	Bacteria	Actinobacteria	Lysinimicrobium	1311	910	1784	1109	1044	1665	1610	2406	636	726	716	3331	559	1280	1410	1682	1442	2881	1822	1064	1153	2025	1339	1426	1687	1816	944	1520	918	1243	2048	1157	2546	1084	1254	492	868	728	750	482	742	1166	763	839	573	817
Bacteria	Bacteria	Proteobacteria	Elioraea	1309	1457	2446	1482	1446	995	1270	2649	1348	1174	1167	2821	658	1419	1053	1059	1083	1562	1298	1208	1114	1352	1113	1304	1569	1577	938	1074	1185	1451	1625	1598	2011	1435	1310	1288	1352	942	1259	663	1624	1788	1208	1298	1150	1737
Bacteria	Bacteria	Cyanobacteria	Arthrospira	1307	1838	1968	1447	1281	941	1074	1232	1153	1225	1181	1687	403	1331	1131	1238	1201	1397	1652	943	857	1011	1195	1100	1660	2024	1081	909	890	1015	1297	1280	1159	1125	1473	1981	2920	1585	2414	1260	3010	2246	1537	2544	1847	3305
Archaea	Bacteria	Thaumarchaeota	Nitrososphaera	1307	6488	3722	4414	2038	4135	4133	2549	456	601	506	4042	1011	1476	3555	3292	4022	5686	4873	1838	4133	2473	3465	3377	4348	11691	1977	2540	3903	1392	3245	2951	1838	1826	975	18015	29179	4673	8592	3351	13524	14063	1971	7409	4152	12267
Bacteria	Bacteria	Proteobacteria	Woeseia	1306	1053	1955	1048	1168	723	629	1119	4628	3019	2238	1131	1132	2099	1162	560	875	823	1217	1574	1449	952	808	1184	1356	1371	889	683	849	1276	759	1384	1049	1119	1529	3052	2426	1115	2361	1060	2640	1353	1250	1880	1969	2948
Bacteria	Bacteria	Actinobacteria	Actinomycetospora	1305	1109	1991	1447	1257	1986	1978	3082	601	799	745	4339	695	1678	1510	2177	1861	3779	2135	1193	1486	2628	1650	1872	1683	1850	1170	1754	1186	1598	2210	1665	3332	1547	1543	481	809	822	987	681	890	1353	853	871	668	720
Bacteria	Bacteria	Cyanobacteria	Chroogloeocystis	1303	1307	1609	1329	1363	1242	1223	1302	1321	1308	1160	1840	417	1023	1157	1314	1173	1742	1571	987	748	1027	1213	1389	1605	2020	1042	1048	1002	1102	1574	1127	1170	1184	1185	1464	1700	1256	1558	893	1980	1673	893	1503	1229	2006
Bacteria	Bacteria	Chloroflexi	Dehalogenimonas	1296	1108	1728	1593	1548	1545	1341	1178	584	945	753	2066	300	1002	1164	1818	1332	2285	2227	854	918	1129	1745	1330	1957	2372	1352	1615	1009	884	1550	1022	1184	1073	941	1002	1429	1317	1192	705	1452	1477	1061	1420	1028	1422
Bacteria	Bacteria	Chloroflexi	Thermomicrobium	1295	1059	1499	1533	1481	1519	1470	1171	533	795	765	2459	381	819	1162	1850	1257	2346	2087	913	865	965	1636	1377	1731	2107	1069	1566	954	929	1511	989	1227	1171	872	942	1269	1175	1151	669	1271	1588	1562	1445	857	1173
Bacteria	Bacteria	Proteobacteria	Mizugakiibacter	1294	1796	3230	1623	2338	1742	1026	1429	1644	1765	1028	1924	2526	1597	2366	1244	1302	1613	2168	1525	1398	2082	1400	1712	2146	2311	1126	1099	1656	1545	1314	1240	2142	2314	1060	998	1487	1676	2314	1321	1668	3887	5542	1352	1806	2104
Bacteria	Bacteria	Proteobacteria	Ferriphaselus	1292	2638	2566	1833	1102	806	874	910	2269	2217	2141	898	426	2360	1202	502	890	981	1149	1265	929	780	978	1124	1521	1958	936	803	1117	1336	997	1522	1029	1429	2041	1956	2457	1767	2461	1402	2964	2540	1498	2214	2169	3674
Bacteria	Bacteria	Chloroflexi	Bellilinea	1290	1591	1846	1859	1480	1589	1427	1270	1092	1103	921	2231	344	1345	1548	1870	1617	2330	2311	1346	987	1153	1597	1533	2237	2657	1446	1592	1360	1232	1762	1476	1283	1598	1398	2747	4011	1966	2789	1934	4017	2620	1991	3440	2521	5721
Bacteria	Bacteria	Proteobacteria	Methylobrevis	1290	1463	2460	1754	1635	1047	889	2077	2568	2287	1892	2676	928	1750	1359	1287	1408	1811	1496	1339	1316	1596	1168	1362	1682	1629	1158	1301	1754	1692	1526	1482	1704	1703	1634	1483	1584	1243	1810	1065	1857	1986	1905	1540	1514	1965
Bacteria	Bacteria	Proteobacteria	Caenimonas	1284	1085	3210	587	574	397	278	866	5277	6220	4695	569	179	1088	507	305	371	452	525	844	505	552	483	621	878	691	391	471	600	753	605	673	568	699	1445	1538	2042	794	1435	690	1845	1088	756	1214	1495	2099
Bacteria	Bacteria	Proteobacteria	Prosthecomicrobium	1279	1350	1884	1238	1261	848	1054	2119	1267	1345	1138	1954	769	1526	1093	775	1064	1231	1124	1172	1173	1384	873	1200	1305	1338	928	816	1078	1355	1411	1487	1678	1275	1479	1073	1289	817	1350	769	1702	1330	1308	1047	1151	1463
Bacteria	Bacteria	Chlorobi	Chlorobium	1278	1332	1598	1299	1282	909	914	1343	1288	1249	1216	1516	411	1267	1142	829	1067	1178	1246	1139	880	1016	966	1052	1463	1781	1009	920	1173	1199	1125	1296	1250	1117	1494	1722	2134	1319	2018	1150	2611	1902	1382	1898	1787	2697
Bacteria	Bacteria	Firmicutes	Ruminiclostridium	1273	712	987	753	881	626	593	869	613	648	628	1040	263	624	656	638	593	850	791	645	505	524	598	700	1006	1127	622	767	584	785	645	734	622	754	896	869	1028	808	961	561	1071	1001	611	898	831	1058
Bacteria	Bacteria	Actinobacteria	Rathayibacter	1269	941	1666	1062	1063	1604	1504	2084	1105	922	744	3070	647	1114	1214	1687	1343	2686	1682	1135	1234	1958	1232	1452	1548	1832	1043	1488	1045	1306	2345	1269	2378	1315	1468	641	971	716	992	542	1001	1147	1087	928	702	926
Bacteria	Bacteria	Firmicutes	Aneurinibacillus	1267	1233	1558	1328	1602	1306	1359	1299	1244	1267	978	1956	386	1069	1183	1521	1090	1837	1637	910	860	873	1301	1396	1525	1998	904	1222	879	1095	1313	1112	1205	1121	1142	1591	1872	1225	1654	913	2049	1729	1770	1646	1425	2064
Bacteria	Bacteria	Proteobacteria	Henriciella	1260	1145	1983	1430	1603	892	992	1430	3307	3946	2170	1913	1761	1121	1468	1016	1351	1593	1398	1189	963	1103	1130	1398	1532	1660	804	1006	2046	1279	2450	1004	1135	1198	1347	1594	1629	1223	2502	1279	2220	1440	1841	1592	1696	2594
Bacteria	Bacteria	Proteobacteria	Marinobacterium	1259	1634	1979	1243	1158	788	679	1199	2466	2246	3679	1229	696	1651	1169	734	985	980	1312	1224	979	826	868	1036	1339	1632	1468	743	1012	1147	1911	1477	1070	1140	1551	2796	2764	1590	2784	1611	3132	2016	1552	2321	2854	5355
Bacteria	Bacteria	Proteobacteria	Desulfobacter	1252	1223	1409	1154	1042	803	860	1181	997	1009	986	1148	323	1255	928	728	1012	949	1208	976	825	885	818	984	1245	1793	958	675	959	1102	1315	1273	994	901	1364	1589	1918	1132	1687	910	1930	1521	949	1637	1335	2089
Bacteria	Bacteria	Candidatus Kryptonia	Candidatus Kryptobacter	1248	1076	1449	1164	1510	900	745	972	938	1047	1510	1468	224	1720	1122	938	906	1067	1382	1352	886	692	916	1103	1493	1668	1068	961	981	1385	871	1648	1089	1287	1384	4617	5643	3073	4522	2996	6991	2991	2061	4629	4805	8267
Bacteria	Bacteria	Proteobacteria	Fodinicurvata	1247	1697	2431	1750	1487	1191	1593	2107	1678	1653	1359	2947	627	1711	1342	1517	1348	1641	1627	1206	1185	1437	1234	1556	1699	1921	977	1182	1789	1491	1699	1528	1791	1810	1245	1475	1250	1147	1658	894	1966	2313	2214	1610	1434	2115
Bacteria	Bacteria	Proteobacteria	Stappia	1247	1253	2077	1393	1263	999	1142	1663	1554	1449	1335	2070	617	1563	1138	1080	1066	1510	1182	1135	1056	1572	1056	1212	1423	1401	970	1013	1125	1445	1362	1403	1401	1248	1579	1309	1586	1113	1580	886	1968	1812	1354	1681	1325	1920
Bacteria	Bacteria	Proteobacteria	Desulfatitalea	1245	1536	1786	1499	1231	1007	1064	1108	1653	1395	1370	1396	320	1410	1179	907	1145	1158	1357	1185	819	956	1055	1051	1552	1953	1214	805	1135	1189	1069	1414	949	1214	1371	2241	2533	1814	2478	1187	3088	2038	1281	2158	2139	3105
Bacteria	Bacteria	Proteobacteria	Leisingera	1244	1527	1857	1402	1226	1047	1064	1669	1337	1288	1277	1724	555	1500	1052	903	1043	1200	1455	1256	1173	1296	971	1170	1308	1693	991	817	1323	1413	1331	1392	1290	1336	1371	1225	1177	892	1298	726	1462	1479	1008	1121	1126	1601
Bacteria	Bacteria	Chloroflexi	Candidatus Promineofilum	1242	1332	1572	1292	1225	1076	1281	1164	1665	1037	1057	1883	306	1069	1132	1531	1168	2011	1530	862	787	850	1277	1139	1629	2108	980	1156	967	899	1293	1244	1079	978	1236	3074	3471	2031	2960	1722	4032	2810	1768	3112	2359	4362
Bacteria	Bacteria	Actinobacteria	Actinosynnema	1237	1044	1727	1547	1408	2074	2351	2213	793	1067	724	3836	576	1238	1464	2377	1823	3456	2288	1029	1157	1728	1782	1770	1822	2239	1144	1868	1095	1154	2070	1109	2455	1317	1089	843	1349	779	902	547	986	1221	960	1107	589	919
Bacteria	Bacteria	Proteobacteria	Methyloferula	1236	1390	2298	1616	1710	1424	1542	3399	935	880	949	2688	1151	1754	1620	915	1252	1551	1715	1228	1349	2077	1321	1712	1881	1787	955	1110	1566	1957	1780	1592	2118	1475	1350	420	647	668	768	429	856	1248	990	755	705	713
Bacteria	Bacteria	Proteobacteria	Defluviimonas	1231	1371	2160	1555	1497	1234	1530	1511	1114	1065	1004	2118	607	1150	1358	1225	1467	1637	1930	999	970	1208	1329	1541	1911	2845	1157	1014	1308	1128	2192	1229	1321	1374	950	743	941	822	1093	651	1256	1713	2499	1090	1050	1299
Bacteria	Bacteria	Proteobacteria	Pantoea	1230	1147	1911	1330	1394	1062	993	1687	1221	1233	1317	1832	832	1152	1268	991	1072	1347	1298	1068	1078	1015	1059	1335	1464	1616	971	1013	1695	1195	2170	1058	1214	1188	1063	1195	1224	1158	1436	1007	1464	1422	1130	1195	1151	1810
Bacteria	Bacteria	Proteobacteria	Chelativorans	1217	1540	1909	1165	1231	879	1099	2220	1372	1326	1173	2255	639	1722	1073	779	1015	1240	1292	1248	1196	1521	980	1164	1316	1404	751	994	1068	1406	1151	1512	1742	1215	1713	1257	1275	867	1324	734	1596	1552	1435	1434	1014	1340
Bacteria	Bacteria	Proteobacteria	Parvibaculum	1215	1279	2507	1898	1655	873	1214	1317	1086	994	1151	1790	1108	1181	1356	991	1447	1055	1573	1232	1089	1185	1035	1442	1799	2070	1223	844	1840	1438	1298	1102	903	1505	790	1115	1191	1243	1191	823	1673	1385	1434	1237	1214	1524
Bacteria	Bacteria	Proteobacteria	Elstera	1202	1217	2465	1573	1583	1099	1326	2210	1416	1269	1172	3044	786	1322	1318	1305	1082	1581	1352	1146	1073	1213	1190	1363	1755	1682	991	1206	1555	1661	1671	1208	1546	1770	892	1056	948	980	1139	730	1250	2175	2234	1463	1367	1575
Bacteria	Bacteria	Proteobacteria	Maritimibacter	1201	1242	2128	1466	1446	981	1014	1309	1876	1891	1352	1861	888	1114	1201	1195	1038	1566	1179	1110	1032	1059	1059	1264	1587	1528	1012	1128	1269	1297	1401	1107	1199	1228	981	1161	1425	972	1401	740	1553	1492	1350	1269	1244	1879
Bacteria	Bacteria	Proteobacteria	Propionivibrio	1197	1574	2236	1247	900	725	691	876	1145	1162	1055	1074	402	1354	1022	577	885	762	1078	1002	807	808	842	1087	1273	1694	683	664	743	871	752	819	859	1004	1460	1546	1607	868	1352	756	1768	1289	838	1224	1311	2282
Bacteria	Bacteria	Verrucomicrobia	Ereboglobus	1196	670	1381	989	877	757	685	1069	3779	4264	2603	1196	761	746	942	575	707	732	809	924	729	687	762	862	1173	1117	762	572	1282	905	1267	894	1101	944	673	963	1127	747	1231	765	1608	897	772	1349	1405	2490
Bacteria	Bacteria	Bacteroidetes	Cytophaga	1194	621	984	546	875	416	263	1474	2132	1924	1780	711	674	484	662	540	417	528	489	654	404	359	495	451	846	818	501	481	1212	613	804	606	400	548	690	966	1068	660	1076	529	1245	723	610	706	888	1627
Bacteria	Bacteria	Proteobacteria	Tistrella	1186	1314	2209	1475	1445	940	1340	1749	1950	1520	1182	2615	781	1369	1211	1209	1149	1497	1388	989	929	1105	1083	1469	1595	1586	887	1119	1474	1435	1469	1162	1309	1454	1088	1011	1058	1050	1227	742	1349	1603	1751	1259	1216	1626
Bacteria	Bacteria	Chloroflexi	Litorilinea	1185	1639	1529	1657	1257	1445	1134	1092	938	1139	827	2003	325	1110	1185	1772	1253	2039	1785	923	793	945	1369	1347	1800	2127	1140	1628	947	1031	1479	1169	1072	1180	1239	2400	3211	1701	2373	1304	3041	2339	1102	2711	1635	3125
Bacteria	Bacteria	Firmicutes	Hungateiclostridium	1181	701	1075	936	825	605	678	841	581	746	903	916	290	694	792	840	700	1005	1002	847	654	626	739	768	965	1128	684	708	576	904	633	742	604	778	759	944	1242	950	925	694	1238	1035	911	1022	961	1398
Bacteria	Bacteria	Proteobacteria	Sphingosinicella	1178	2115	3200	2140	2642	1136	871	1296	6143	4368	2726	3119	1944	891	2745	1949	1771	2806	2260	905	777	968	2634	1628	2811	2015	1019	2548	1833	938	1542	689	936	1398	690	1071	1246	684	1192	801	1440	1490	1421	1573	1218	1648
Bacteria	Bacteria	Proteobacteria	Roseobacter	1174	1168	1793	1277	1325	884	1065	1651	1421	1471	1182	1898	666	1319	1183	876	1107	1417	1270	1080	1069	1163	1075	1217	1532	1648	934	980	1370	1306	1551	1411	1310	1369	1309	1145	1228	940	1224	764	1324	1296	1221	1245	1133	1477
Bacteria	Bacteria	Planctomycetes	Candidatus Scalindua	1168	1332	1455	1345	1563	1094	1032	1243	783	1054	1552	1329	498	1143	1124	925	1128	1322	1283	1434	1141	1127	1039	1223	1348	1719	1201	857	1093	1223	1576	1496	1348	1090	1128	3141	3286	1816	2841	1631	3833	2197	2344	2587	2313	3887
Bacteria	Bacteria	Bacteroidetes	Larkinella	1157	1184	1711	1002	1236	718	572	996	2529	2420	2021	1125	440	913	959	562	835	887	860	976	611	773	611	783	1216	1326	974	804	784	980	798	1034	793	1021	1240	1539	1789	1065	1607	785	1863	1321	885	1330	1498	2352
Bacteria	Bacteria	Actinobacteria	Sinomonas	1156	805	1568	1482	1549	2222	1859	2011	436	747	636	4075	629	1165	1665	3070	1787	4403	2319	958	1244	1872	1810	1670	1663	2116	948	1983	925	1208	2231	1178	2308	1337	983	389	572	743	668	392	588	1118	935	613	487	487
Bacteria	Bacteria	Proteobacteria	Photobacterium	1155	1251	1749	1266	1219	1017	944	1376	1994	1908	1781	1325	674	1175	1080	700	1089	1121	1583	982	844	1075	961	1140	1473	1700	979	779	1146	1156	1232	1057	1037	1093	1160	1466	1564	1050	1510	789	1856	1381	1005	1418	1274	1926
Bacteria	Bacteria	Proteobacteria	Azonexus	1150	1931	2052	1291	921	614	569	768	1954	1979	1930	669	511	1774	925	411	677	748	927	1102	693	580	832	952	1321	1595	713	624	693	1112	752	1181	838	1212	1459	1802	1935	1212	2008	896	2474	1870	1081	1468	1823	3119
Bacteria	Bacteria	Bacteroidetes	Aequorivita	1147	1002	1292	702	1019	675	569	722	1469	1565	1452	844	359	724	753	671	553	761	883	798	601	602	682	695	1051	1345	744	769	725	584	737	765	629	889	1104	1314	1570	833	1266	776	1778	996	595	1273	1060	2320
Bacteria	Bacteria	Proteobacteria	Gallionella	1140	1556	2269	1780	1216	962	1244	1432	1198	1469	1317	1560	752	1684	1344	821	1137	1168	1310	1165	897	945	1107	1522	1640	1974	836	991	1115	1261	1036	1456	1212	1433	1350	1098	1502	1231	1640	843	2007	1855	1504	1427	1530	2129
Bacteria	Bacteria	Proteobacteria	Desulfococcus	1128	1236	1343	1235	1328	1019	903	969	1340	1336	1385	1249	310	1157	878	1206	908	1088	1271	980	823	854	889	968	1284	1557	960	763	812	995	995	1149	789	1033	1280	1881	2227	1402	2036	1023	2593	1609	1011	2086	1723	2811
Bacteria	Bacteria	Actinobacteria	Allokutzneria	1127	843	1664	1259	1172	1988	1837	2243	490	726	558	3926	617	1060	1549	2341	1851	3188	2204	902	1011	1794	1626	1533	1580	1933	994	1554	977	1156	2182	1120	2468	1404	1041	514	748	632	726	455	664	1146	1094	692	509	496
Bacteria	Bacteria	Actinobacteria	Ferrithrix	1125	724	1638	1167	1535	1861	1717	2629	568	618	607	3600	630	1035	1600	2135	1615	3100	2031	1110	1289	1858	1325	2046	1698	1922	913	1592	859	1394	2067	1054	2246	1091	1085	192	273	417	546	373	367	784	865	515	297	345
Bacteria	Bacteria	Proteobacteria	Methylopila	1123	1159	1863	1249	1225	895	941	1700	1298	1218	1095	1915	656	1353	1097	952	1087	1305	1340	1028	1118	1266	965	1054	1288	1396	814	1057	1134	1353	1336	1312	1260	1187	1593	1016	1137	741	1204	704	1448	1450	1410	1167	1025	1417
Bacteria	Bacteria	Actinobacteria	Glycomyces	1116	711	1593	1093	1113	1402	1331	1920	1091	1230	768	2630	470	990	1169	1586	1416	2495	1853	915	950	1434	1281	1322	1504	1686	886	1242	859	1024	1642	1043	1898	1234	1265	514	930	786	864	576	889	1371	1515	839	649	838
Bacteria	Bacteria	Proteobacteria	Pannonibacter	1116	1108	1782	1159	1081	848	844	1703	1209	1210	1041	1748	692	1325	1077	766	862	1130	1120	1045	904	1048	853	1007	1290	1376	809	859	1082	1193	1169	1262	1262	1199	1069	927	1029	853	1104	599	1366	1170	1096	1150	1019	1527
Bacteria	Bacteria	Proteobacteria	Telmatospirillum	1107	1437	2650	2303	2796	1710	1985	2925	1262	1085	882	3836	4809	1277	2785	2297	1617	3072	1957	1187	1228	1419	1694	2153	2023	2282	1176	1975	2429	1729	2348	1354	2067	1702	871	292	404	836	749	492	758	1946	2809	853	1031	878
Bacteria	Bacteria	Proteobacteria	Colwellia	1106	1024	1657	988	1224	775	886	1283	1996	1350	1729	1176	985	1085	1092	691	769	1023	1148	1054	902	904	847	1114	1374	1506	805	672	934	989	933	1010	928	924	1048	1579	1700	1152	1795	921	2022	1401	1056	1495	1524	2657
Bacteria	Bacteria	Proteobacteria	Shigella	1101	956	1682	1035	1307	1049	898	1194	1362	1533	1326	1555	805	974	1234	869	1090	1216	1214	902	777	1230	964	1094	1418	1640	943	919	1160	1008	1887	923	1012	1111	894	988	1068	819	1131	749	1357	1319	1113	988	951	1523
Bacteria	Bacteria	Bacteroidetes	Lewinella	1088	872	1136	623	783	482	405	667	1399	1457	1373	741	267	817	629	510	535	722	763	1189	590	721	539	504	886	952	746	664	549	809	731	805	725	671	1007	1872	2405	1155	2166	1028	2330	1260	904	1715	1537	2931
Bacteria	Bacteria	Proteobacteria	Solimicrobium	1088	1063	1823	1647	1714	1106	1001	1095	579	691	744	1781	1784	843	1549	1040	1199	1443	1472	792	656	649	946	1650	1651	1921	720	948	926	968	989	781	672	1081	650	443	752	594	682	439	846	848	1042	596	823	849
Bacteria	Bacteria	Cyanobacteria	Phormidium	1087	1019	1360	1083	946	818	910	1093	822	816	772	1279	306	914	936	769	984	1087	1226	829	675	761	871	964	1184	1582	898	727	813	841	1047	970	846	929	980	1257	1679	1001	1366	759	1633	1272	957	1372	1000	1746
Bacteria	Bacteria	Proteobacteria	Jannaschia	1077	1292	1681	1158	1127	950	970	1522	1498	1451	1237	1711	693	1224	933	918	898	1231	1243	1124	1048	1225	964	1003	1227	1331	890	927	1148	1287	1295	1310	1417	1115	1153	1182	1238	849	1367	761	1578	1442	1167	1176	1092	1778
Bacteria	Bacteria	Actinobacteria	Motilibacter	1077	1155	1740	1310	1189	2063	1733	2300	738	1001	983	3517	641	1424	1558	2149	1552	3275	2049	1101	1291	2034	1451	1681	1758	2334	1138	1704	965	1341	2168	1305	2449	1231	1374	503	853	922	737	524	898	1160	873	789	589	610
Bacteria	Bacteria	Proteobacteria	Shinella	1074	1079	1742	1119	1105	879	801	1627	1601	1475	1170	1652	800	1279	1010	732	934	1014	1130	976	986	1268	872	1079	1250	1145	811	831	1006	1225	2533	1185	1462	1105	1100	1036	1061	752	1397	735	1409	1316	1130	1169	1054	1525
Bacteria	Bacteria	Proteobacteria	Pelagibacterium	1072	1021	1598	994	901	719	658	1475	2073	1768	1677	1547	525	1254	778	778	813	1011	899	1066	1025	1345	806	785	1162	1119	920	845	1041	1164	1136	1259	1128	1033	1676	1572	1752	877	1262	817	1802	1452	1093	1504	1230	1968
Bacteria	Bacteria	Proteobacteria	Methylovorus	1068	1418	1553	1313	1146	471	505	646	2000	2286	1144	791	629	1391	902	449	777	587	729	1433	563	484	614	1220	1130	1150	515	651	2464	1324	794	1204	773	989	1553	1838	2204	2587	2768	4902	4014	2566	7109	3095	4340	4909
Bacteria	Bacteria	Proteobacteria	Geoalkalibacter	1063	829	1139	802	827	616	602	868	864	616	708	991	338	811	674	669	714	780	885	931	608	559	727	837	1091	1440	763	610	656	808	803	781	641	738	880	1168	1595	1138	1538	779	1909	1399	829	1314	1160	2047
Bacteria	Bacteria	Chloroflexi	Thermorudis	1056	705	1152	1061	963	895	821	776	312	552	431	1519	198	607	873	1495	841	1498	1310	608	559	660	1064	853	1115	1494	661	1124	585	629	960	611	816	713	701	431	769	727	604	353	713	773	640	749	387	475
Bacteria	Bacteria	Proteobacteria	Desulfobacca	1053	1087	1305	1245	962	915	993	1132	793	792	736	1261	280	1019	896	834	1026	866	1259	908	711	717	868	1147	1336	1734	930	780	819	1019	1074	1004	920	972	943	1321	1881	1944	1788	1119	2399	1845	964	1774	1467	2627
Bacteria	Bacteria	Chloroflexi	Oscillochloris	1053	1439	1224	1075	921	999	1050	946	527	667	522	1634	342	861	1017	1423	1116	1659	1611	787	780	825	1339	1097	1479	1860	950	909	801	753	1435	1034	1055	1004	1137	1363	1929	1429	1779	1004	2222	2009	1785	1993	1198	1888
Bacteria	Bacteria	Proteobacteria	Ketogulonicigenium	1052	996	1787	1089	1280	850	670	1438	1814	1635	1236	1876	825	1183	1113	830	918	1337	1158	1036	903	1247	925	1037	1274	1293	882	985	1417	1233	1350	1070	1287	1263	1191	1175	1279	868	1367	823	1481	1421	1471	1183	1041	1701
Bacteria	Bacteria	Proteobacteria	Sulfuricaulis	1051	1295	1667	1712	1005	689	761	968	883	887	1226	1065	620	1403	946	547	868	838	1111	1287	1088	731	767	1031	1300	1360	785	608	748	957	646	1319	817	920	1142	1800	1879	1287	1887	914	2090	1463	1097	1599	1516	2371
Bacteria	Bacteria	Bacteroidetes	Elizabethkingia	1049	486	1037	387	793	399	222	556	2437	2170	1741	578	294	445	432	344	388	417	388	666	446	383	325	368	639	698	536	404	439	433	465	508	472	630	728	600	830	476	973	468	926	702	977	546	708	1149
Bacteria	Bacteria	Bacteroidetes	Muricauda	1049	844	1181	704	866	492	495	651	2741	2140	2033	725	268	696	614	632	528	659	604	699	556	477	557	589	820	1044	578	529	579	638	505	754	453	593	1010	1660	1980	1073	1748	850	2100	1460	894	1399	1377	2629
Bacteria	Bacteria	Cyanobacteria	Cylindrospermopsis	1048	1210	1293	765	872	693	722	938	795	551	603	1039	246	910	811	781	672	814	1002	883	699	672	740	830	1083	1350	742	582	771	778	874	960	848	632	1116	1637	1806	1058	1568	785	2006	1467	991	1398	1114	1877
Bacteria	Bacteria	Proteobacteria	Allochromatium	1046	976	1683	1107	1093	731	720	1038	1363	1292	1199	1236	693	1059	1163	749	886	1112	1397	940	790	716	835	1092	1406	1605	748	656	990	935	949	830	793	1076	980	1328	1412	890	1331	613	1507	1295	1044	1164	1293	2091
Bacteria	Bacteria	Proteobacteria	Alkalilimnicola	1044	1052	1764	1321	1206	956	1041	1080	1657	1458	1182	1945	943	1280	1192	1019	1104	1640	1530	1005	944	883	1065	1454	1478	1514	850	992	1973	995	1142	888	935	1268	1137	1323	1441	955	1395	680	1615	1428	1314	1243	1277	1772
Bacteria	Bacteria	Firmicutes	Catenibacterium	1044	1124	1841	1170	1620	1025	887	1297	2498	2749	1874	1704	1440	1067	1406	1211	1139	1871	1390	1158	1007	1748	1152	1206	1417	1502	897	1025	1256	1219	1373	982	1244	1313	1242	1657	1787	1123	1859	951	1938	1753	1993	1510	1472	2042
Bacteria	Bacteria	Proteobacteria	Sedimenticola	1042	1348	1838	1440	1280	1020	1070	1092	1401	1332	1435	1756	704	1236	1329	1169	987	1386	1664	985	938	913	1126	1372	1532	1973	810	1158	1375	1035	1084	981	909	1327	1027	1384	1317	1017	1556	719	1693	1570	1083	1227	1190	1636
Bacteria	Bacteria	Bacteroidetes	Fibrella	1039	955	1135	778	823	613	611	804	1954	1914	1600	991	235	708	679	572	615	712	917	838	693	848	597	724	954	1184	727	630	741	707	760	805	732	739	1041	1211	1445	878	1060	634	1411	1236	899	994	969	1623
Bacteria	Bacteria	Proteobacteria	Zavarzinia	1032	1378	1997	1297	1297	708	921	1314	1103	1163	1070	1898	767	1098	980	1007	941	1172	1262	936	762	905	919	1136	1483	1500	905	857	1107	1117	1217	960	1117	1197	873	1010	1029	778	1054	572	1393	1445	2370	1183	1064	1543
Bacteria	Bacteria	Cyanobacteria	Kamptonema	1025	1156	1431	1121	936	781	909	916	930	945	680	1230	297	873	873	942	979	1114	1215	792	659	725	1036	959	1228	1469	794	746	684	950	878	880	779	791	1020	1398	1729	1286	1629	900	1787	1957	1629	1547	1290	1986
Bacteria	Bacteria	Chlorobi	Prosthecochloris	1020	536	710	592	728	406	457	742	353	423	482	769	214	534	539	379	497	531	602	536	386	407	466	502	749	731	613	379	532	692	740	496	553	496	495	750	1003	612	824	443	1116	839	508	773	598	1173
Bacteria	Bacteria	Bacteroidetes	Cyclobacterium	1016	1040	1281	718	1070	475	387	696	3096	2571	2419	834	291	715	694	531	599	697	696	937	531	519	551	574	931	963	681	669	532	764	363	810	599	776	987	1960	1962	770	1817	817	1973	1506	820	1420	1612	2952
Bacteria	Bacteria	Proteobacteria	Desulfacinum	1013	1004	1400	1142	1111	1058	933	894	867	741	704	1328	253	1016	946	956	961	1130	1181	791	602	547	995	1101	1265	1505	711	764	591	1012	904	952	812	885	786	1438	2020	1345	1804	966	2406	1488	931	1636	1337	2287
Bacteria	Bacteria	Actinobacteria	Brachybacterium	1011	760	1079	796	900	1025	1009	1282	590	703	743	1891	315	804	819	1272	977	1677	1142	733	833	1069	868	927	998	1132	750	978	670	914	1260	818	1348	878	1048	735	893	795	875	504	982	1066	847	911	691	829
Bacteria	Bacteria	Cyanobacteria	Geitlerinema	997	879	1315	1046	1042	780	884	965	903	777	673	1307	328	776	838	908	839	1228	1044	725	670	701	779	865	1142	1595	650	783	753	677	885	827	796	966	941	1384	1571	869	1306	716	1533	1238	823	1601	1128	1682
Bacteria	Bacteria	Proteobacteria	Candidatus Magnetomorum	989	746	853	786	565	471	556	641	2557	1630	1066	597	405	917	560	411	564	444	663	743	639	563	497	474	869	1079	967	383	1094	768	702	1172	678	927	751	1835	2416	1088	2071	990	2817	1327	760	1948	1563	3155
Bacteria	Bacteria	Verrucomicrobia	Coraliomargarita	988	752	887	797	523	627	545	1131	2550	2099	1626	831	318	982	607	326	629	475	750	923	873	845	526	778	757	837	812	470	757	1010	803	1120	1128	914	754	1221	1615	918	1510	789	1871	961	661	1370	1359	2123
Bacteria	Bacteria	Actinobacteria	Pimelobacter	987	864	1234	876	912	788	787	1197	950	1039	938	1519	438	920	911	788	886	1391	1027	753	702	1020	701	837	1064	1188	796	862	756	951	1005	892	1194	978	1238	836	1004	838	911	596	1018	1105	859	855	710	1064
Bacteria	Bacteria	Acidobacteria	Holophaga	982	1373	3088	1765	916	791	864	607	448	453	670	1397	1763	1013	1135	1860	1286	1276	2655	741	445	516	1356	1498	1885	2067	805	635	2035	659	1595	787	927	926	484	688	1167	1001	1175	635	1479	1469	972	1074	998	1702
Bacteria	Bacteria	Proteobacteria	Candidatus Phaeomarinobacter	981	1097	2218	1392	1209	709	865	827	836	915	990	1417	609	1293	975	569	936	806	1135	1112	886	1014	768	1084	1502	1469	916	678	1343	1217	972	1157	782	1161	707	1123	1228	1147	1133	747	1814	1281	1120	1229	1217	1592
Bacteria	Bacteria	Proteobacteria	Robiginitomaculum	980	928	1358	957	1004	606	597	935	1659	1369	968	1143	857	966	824	549	781	898	1219	843	755	755	752	937	988	1286	704	569	908	899	728	838	727	830	837	1206	1208	764	1269	582	1687	947	793	1092	947	1718
Bacteria	Bacteria	Proteobacteria	Leptothrix	977	1701	1844	1348	1161	774	783	952	1952	1828	1434	963	485	1219	916	598	743	869	871	754	664	533	715	999	1147	1382	627	753	670	738	567	985	585	944	1208	1781	1598	751	1464	649	1867	1335	917	1345	1497	2297
Bacteria	Bacteria	Proteobacteria	Oleomonas	970	1065	1705	1331	1237	938	975	1444	1104	999	856	1689	839	990	1058	878	1018	1180	1153	854	791	938	860	1117	1352	1324	764	714	1357	1095	1475	1062	1140	1181	796	797	798	744	950	596	1015	1241	1305	834	956	1421
Bacteria	Bacteria	Cyanobacteria	Chlorogloeopsis	969	931	1154	932	924	919	814	949	686	969	995	1195	243	774	816	841	748	1121	1110	815	579	806	839	919	1157	1465	845	730	811	872	1067	881	821	718	783	681	1046	796	955	554	1271	1288	1101	1049	771	1222
Bacteria	Bacteria	Proteobacteria	Desulfurivibrio	967	1105	1448	1005	1091	582	516	694	666	836	1123	776	212	854	726	507	811	722	1085	706	553	617	656	663	1028	1444	776	496	435	545	609	842	588	584	737	929	1232	772	1184	611	1349	974	902	1171	1007	1524
Bacteria	Bacteria	Firmicutes	Blautia	964	829	1298	1122	1039	822	899	952	1207	958	967	1489	485	753	944	938	949	1328	1198	991	1009	1008	800	904	1110	1331	820	962	856	1036	1044	902	843	888	1499	1017	1407	899	1247	764	1512	1454	982	1212	1047	1623
Bacteria	Bacteria	Actinobacteria	Frondihabitans	961	513	1503	926	1051	1381	1356	1897	250	387	308	2895	519	850	1107	1644	1413	2669	1454	666	875	1429	1013	1363	1412	1452	806	1217	730	777	1966	716	1855	888	547	89	160	288	258	183	220	596	742	251	208	180
Bacteria	Bacteria	Firmicutes	Thermoanaerobacter	961	862	1178	1301	1125	1250	1044	1236	623	816	1106	1747	384	867	1027	1271	997	1576	1491	956	806	935	1135	1070	1254	1403	760	1145	822	1060	1246	1047	1224	1150	1398	1637	1892	1495	1933	985	2416	1768	1355	1557	1403	2150
Bacteria	Bacteria	Proteobacteria	Thioclava	953	1208	1697	1209	980	819	961	1669	1098	1193	1018	1783	533	1241	918	781	818	1130	1072	984	973	1090	870	1070	1219	1187	756	848	1098	1284	1157	1152	1384	1131	1182	886	1144	866	1100	775	1543	1373	1001	1293	1102	1562
Bacteria	Bacteria	Proteobacteria	Imhoffiella	945	953	1432	1178	1048	785	1007	1132	1003	1157	1088	1217	714	853	1006	760	929	1125	1238	800	762	856	903	1212	1253	1316	722	735	983	999	902	840	808	957	888	1009	1186	957	1238	562	1354	1124	1006	1019	1063	1569
Bacteria	Bacteria	Proteobacteria	Candidatus Thiodiazotropha	944	1195	1707	1187	1191	815	922	927	1741	1268	1266	1628	1241	1055	1175	905	975	1249	1543	965	774	864	945	1246	1318	1440	738	905	1325	976	929	781	894	1155	1136	2138	2294	1125	2069	1032	2444	1693	1259	1826	1689	2589
Bacteria	Bacteria	Proteobacteria	Desulfobacterium	943	1225	1282	1161	1032	831	1213	1167	995	1246	1159	1254	388	1048	1036	941	935	1063	1253	1288	936	1116	792	996	1252	1928	1091	769	1020	1407	1515	1478	1227	1100	1493	1372	1819	989	1669	1014	1909	1634	646	1495	1357	2089
Bacteria	Bacteria	Proteobacteria	Paraglaciecola	940	892	1459	771	802	562	548	697	1296	1086	1386	945	499	854	776	558	759	745	855	770	496	592	525	792	989	1006	460	558	546	793	661	772	533	728	863	1121	1246	746	1327	699	1447	1131	915	1069	1155	1718
Bacteria	Bacteria	Proteobacteria	Candidatus Competibacter	939	1427	1807	1319	1071	911	944	1108	1291	1224	1108	1401	513	1361	1085	895	1072	1043	1347	1181	957	1141	903	1120	1338	1740	907	722	1032	1109	897	1215	1166	1054	1518	1698	1908	1234	1667	906	1908	1524	1361	1432	1341	2152
Bacteria	Bacteria	Proteobacteria	Humitalea	934	1111	1836	1218	1188	989	998	1594	1230	1280	918	1782	677	1163	885	839	994	1177	1209	847	852	1030	787	1005	1310	1493	727	882	968	1102	1192	1139	1221	1157	1041	1019	1073	723	1107	616	1065	1366	951	1140	966	1429
Bacteria	Bacteria	Proteobacteria	Marichromatium	931	973	1364	1032	900	684	742	899	1174	1033	939	1253	612	1100	873	688	788	961	935	882	793	716	693	963	978	1222	727	696	907	997	945	793	823	953	999	1271	1177	853	1487	783	1517	1250	1135	1242	1260	1924
Bacteria	Bacteria	Bacteroidetes	Roseivirga	931	568	758	384	685	326	253	656	6852	4102	5499	510	262	533	466	248	272	319	350	787	436	393	400	391	578	617	442	372	466	617	305	634	331	606	907	2076	2490	787	2786	886	2473	1025	921	1615	1566	3476
Bacteria	Bacteria	Proteobacteria	Citrobacter	929	1069	1534	841	1090	667	558	916	4063	3469	4755	1171	798	800	927	686	849	989	832	1003	651	926	676	758	1105	1082	579	798	1500	885	1879	910	846	896	1444	1272	1512	1048	2344	849	1724	1562	1944	1098	1410	2371
Bacteria	Bacteria	Proteobacteria	Desulfomicrobium	926	914	954	697	666	464	533	644	1281	1111	860	849	245	804	595	528	568	630	708	654	504	525	590	590	827	943	708	498	729	706	642	763	537	731	747	1230	1489	1001	1420	755	1665	1288	673	1257	1069	1804
Bacteria	Bacteria	Nitrospirae	Leptospirillum	921	752	1224	1045	935	823	851	1036	304	473	523	1166	365	713	838	837	958	997	1081	659	902	638	864	964	1102	1458	764	738	899	830	1030	732	884	881	636	610	787	775	790	523	887	968	897	783	658	991
Bacteria	Bacteria	Actinobacteria	Sporichthya	915	886	1777	1619	2537	1986	1808	2303	2689	2391	791	3644	838	1246	2132	2263	1791	3547	1575	1149	986	1846	1390	2032	1514	1516	935	1697	1980	1690	1750	1015	2259	1333	1167	2446	1073	1026	2967	1457	4376	2241	5038	3710	1704	4811
Bacteria	Bacteria	Firmicutes	Ruminococcus	914	734	1207	1020	973	739	718	814	926	1131	892	1277	355	690	853	872	849	1336	1135	896	612	742	760	839	1127	1472	767	757	661	848	953	693	623	925	1060	932	1121	990	1166	741	1403	1231	1260	1113	1134	1500
Bacteria	Bacteria	Proteobacteria	Phreatobacter	910	850	1176	715	623	577	618	1606	935	805	920	1142	297	1168	603	369	550	690	625	917	938	1148	591	615	724	683	629	518	720	1086	793	1219	1250	785	1325	672	872	428	930	466	1160	928	586	753	587	758
Bacteria	Bacteria	Firmicutes	Lactobacillus	909	658	1227	857	867	960	800	1166	823	1037	1000	1772	411	753	878	905	826	1583	1141	920	772	1028	865	945	1071	1254	711	888	809	846	1004	823	969	868	1045	1081	1272	1127	1167	708	1492	1133	860	1068	907	1520
Archaea	Bacteria	Euryarchaeota	Methanoculleus	908	900	1382	1362	1137	1351	1489	991	421	650	613	1726	307	892	1011	1383	1195	1587	1912	804	799	911	1193	1156	1358	1780	936	1068	865	779	1211	843	957	891	809	1024	1314	1693	1025	774	1414	1294	1390	998	812	1214
Bacteria	Bacteria	Actinobacteria	Brevibacterium	900	666	1276	974	939	1411	1277	1772	591	724	596	2635	520	986	1171	1601	1160	2614	1616	1182	1095	1612	1127	1136	1225	1547	844	1382	837	990	1935	1003	2045	1095	1189	534	757	644	762	526	824	988	777	736	546	661
Bacteria	Bacteria	Proteobacteria	Sideroxydans	894	1816	1665	1499	841	483	605	702	1603	1515	1309	703	450	1866	821	381	617	524	826	1035	826	663	611	745	888	1335	632	477	775	964	538	1179	875	1015	1377	1511	1816	1417	1791	923	2166	1769	1226	1576	1579	2491
Bacteria	Bacteria	Bacteroidetes	Solitalea	893	658	990	302	593	200	130	405	2137	2191	2216	327	163	535	323	190	292	246	425	709	452	410	234	286	540	584	527	246	303	460	181	543	380	569	965	1025	1242	459	1096	456	1213	763	704	661	714	1668
Bacteria	Bacteria	Proteobacteria	Rhodospirillum	886	1007	1674	1234	1088	803	870	1617	919	939	818	1956	617	995	964	883	948	1129	1136	760	673	794	811	1044	1268	1472	760	828	1161	1017	1252	925	1154	1101	739	663	660	713	791	607	852	1360	1395	756	812	1029
Bacteria	Bacteria	Firmicutes	Desulfitobacterium	882	862	1247	1011	974	870	843	1139	826	1088	877	1420	354	810	882	900	887	1333	1237	736	665	750	769	927	1105	1268	630	825	763	780	883	838	881	802	823	1446	1691	1109	1493	880	2105	1381	1080	1527	1285	2174
Bacteria	Bacteria	Proteobacteria	Marinicaulis	881	802	1252	829	955	803	737	1489	981	832	799	1403	1075	835	836	609	735	894	789	871	810	867	680	918	1096	1110	692	643	861	1050	1083	923	1084	770	846	831	790	525	873	433	1007	947	789	662	694	907
Bacteria	Bacteria	Firmicutes	Selenomonas	880	709	916	835	984	801	707	669	708	805	830	1208	253	613	803	958	692	1241	1129	753	607	549	731	744	1071	1151	568	933	574	727	835	686	546	754	1108	1205	1310	1030	1139	721	1463	1157	1048	1162	877	1626
Bacteria	Bacteria	Actinobacteria	Microlunatus	879	551	1105	939	844	1226	1244	1661	404	484	484	2499	393	824	982	1717	937	2044	1332	680	731	1337	934	1141	1110	1321	586	1269	705	821	1374	857	2209	942	860	327	556	482	478	387	481	835	483	528	368	385
Bacteria	Bacteria	Proteobacteria	Methylosarcina	878	924	1016	700	679	584	472	752	704	601	711	802	213	739	571	440	578	687	763	668	574	625	503	623	717	1008	624	488	536	678	627	799	566	734	731	1041	1182	814	1138	545	1330	1189	688	1015	876	1441
Archaea	Bacteria	Euryarchaeota	Haloferax	878	1100	1313	1253	1142	947	1020	985	932	1035	849	1317	268	997	961	1002	1028	1273	1333	893	827	784	873	935	1185	1402	719	822	559	990	1045	977	974	975	1012	1251	1732	1650	1565	959	1901	1434	1006	1630	1218	1948
Bacteria	Bacteria	Proteobacteria	Ferrovibrio	871	1051	1500	1189	1073	771	1004	1484	1662	1319	1033	1965	469	1066	893	940	865	1083	1039	778	786	834	933	947	1075	1330	810	801	1145	1182	1267	976	1226	1166	1053	1118	1115	966	1295	695	1862	1487	1799	1409	1256	1890
Bacteria	Bacteria	Firmicutes	Sporomusa	870	892	1312	1056	1134	1327	926	899	685	836	750	1632	271	840	981	1353	889	1532	1425	689	613	610	1080	1176	1162	1642	620	1196	695	763	991	707	759	911	859	1044	1277	1134	1173	721	1397	1302	774	1164	1073	1538
Bacteria	Bacteria	Proteobacteria	Celeribacter	867	864	1405	888	943	703	779	1379	1019	935	766	1438	418	909	774	820	724	1005	974	720	717	917	734	822	929	1104	754	727	904	988	969	900	996	965	1027	1136	1093	792	1116	507	1183	1143	901	964	861	1240
Bacteria	Bacteria	Cyanobacteria	Cyanobium	866	1013	1256	852	815	713	617	875	627	633	633	947	305	952	800	605	676	755	885	724	568	619	697	771	948	1211	629	594	743	776	933	818	885	876	1075	874	1029	625	923	502	1087	1018	726	878	721	1169
Bacteria	Bacteria	Proteobacteria	Desulfonatronum	862	1007	1224	941	991	592	775	876	633	769	858	996	238	943	853	633	699	904	856	779	575	602	789	791	1059	1253	716	634	582	739	876	895	718	724	870	1528	1691	1149	1425	697	1851	1371	945	1545	1158	1942
Bacteria	Bacteria	Chloroflexi	Leptolinea	862	1063	1109	1105	1108	924	1228	1062	653	631	426	1491	302	780	949	1459	938	1488	1343	778	628	628	1020	1066	1447	1619	865	868	834	793	1129	1148	863	1011	777	2249	3182	1195	1910	1262	2752	1846	1436	2367	1898	4417
Bacteria	Bacteria	Proteobacteria	Thiodictyon	861	1090	1348	1167	924	884	987	1382	667	751	770	1356	465	1076	841	937	888	978	1094	877	755	888	705	926	1069	1451	899	787	799	1058	1117	1071	1118	861	1293	1165	1518	1059	1337	676	1377	1523	869	1362	1111	1687
Bacteria	Bacteria	Firmicutes	Carboxydothermus	860	654	1200	1103	969	877	1348	769	521	611	646	1458	263	679	890	1210	1258	1410	1348	550	523	529	1486	1158	1279	2163	976	762	811	538	1243	698	699	706	669	1081	1193	760	926	514	1261	1075	1738	929	779	1327
Bacteria	Bacteria	Proteobacteria	Fontimonas	860	840	1168	908	1090	674	679	802	1033	950	833	926	916	704	1019	523	685	786	881	693	591	528	653	964	1049	1100	526	497	682	667	688	546	527	687	628	2643	2229	646	2480	992	3497	1433	1066	2106	1680	4054
Bacteria	Bacteria	Proteobacteria	Breoghania	855	858	1254	706	670	531	539	1274	651	577	639	1078	314	937	681	467	548	653	669	648	615	814	632	670	955	776	529	540	722	894	788	764	914	771	870	546	739	659	866	448	955	1071	788	835	741	952
Bacteria	Bacteria	Proteobacteria	Roseivivax	852	764	1284	833	846	561	597	1231	1090	1054	1035	1206	348	840	706	542	705	871	894	857	691	899	681	702	874	953	652	655	779	804	885	811	1035	838	959	978	1069	731	1079	627	1252	1174	958	1147	963	1366
Bacteria	Bacteria	Proteobacteria	Frateuria	850	695	1395	1251	1388	918	923	786	928	764	570	1359	2014	623	1536	1264	1429	3845	2061	723	651	4792	1284	1150	1050	1216	1118	891	1280	683	1636	507	2683	1649	546	504	670	642	976	573	1103	1618	2505	671	730	978
Bacteria	Bacteria	Proteobacteria	Sinimarinibacterium	848	707	1324	911	835	608	589	853	1062	1379	1927	834	1198	635	822	575	625	892	818	592	446	362	472	991	1061	1129	507	393	754	645	930	513	435	549	562	1640	1327	576	1632	641	2127	908	889	1256	1221	2653
Bacteria	Bacteria	Proteobacteria	Dickeya	846	811	1388	820	910	647	650	916	855	991	953	1162	682	662	927	815	798	990	788	525	503	572	587	841	979	921	568	713	891	652	5750	634	675	680	705	657	743	609	850	501	966	852	713	870	887	1216
Bacteria	Bacteria	Actinobacteria	Micrococcus	843	611	1064	1016	813	822	829	1090	605	923	724	1765	294	814	821	1789	924	1535	1097	736	673	945	896	834	956	1071	689	1000	650	688	1105	779	1238	866	997	648	884	645	888	481	912	930	663	801	538	846
Bacteria	Bacteria	Cyanobacteria	Nodularia	842	898	1139	884	885	747	860	959	637	780	623	1186	323	703	738	799	750	981	1100	602	490	632	835	851	1092	1290	597	683	958	697	948	690	760	653	748	929	1151	729	991	561	1125	1299	820	1232	697	1220
Bacteria	Bacteria	Proteobacteria	Salinisphaera	840	851	1246	1007	899	725	715	878	791	724	702	1406	769	894	920	871	850	1056	1108	636	697	888	763	965	949	1029	575	751	918	800	724	769	804	944	774	1045	999	774	1207	524	1075	1384	1306	885	818	1179
Bacteria	Bacteria	Proteobacteria	Starkeya	840	1130	1429	1761	1963	788	801	1598	861	858	800	2023	608	1205	1410	623	926	897	926	869	1083	1158	744	921	1113	1098	703	1379	873	1125	2417	1025	1332	1023	1047	510	674	457	751	394	794	901	684	691	656	819
Bacteria	Bacteria	Proteobacteria	Pseudaminobacter	833	733	1100	658	708	444	530	1087	1451	1067	716	1008	595	856	623	404	559	748	687	615	630	728	513	622	763	783	528	523	639	802	794	773	886	692	664	643	853	526	803	454	1083	1113	969	754	688	1004
Bacteria	Bacteria	Planctomycetes	Roseimaritima	830	810	665	567	580	379	479	704	824	830	814	718	213	580	472	458	579	688	699	583	488	587	487	509	664	682	596	361	429	601	690	762	600	485	806	1234	1581	613	1298	601	1692	938	456	1257	1055	1795
Bacteria	Bacteria	Firmicutes	Planifilum	827	819	1260	1170	1068	1007	1058	830	564	637	655	1325	240	738	887	1226	1024	1491	1511	777	629	594	970	1097	1231	1756	823	931	750	720	1224	887	795	839	841	1115	1368	929	1180	709	1600	1308	1365	1167	918	1601
Bacteria	Bacteria	Actinobacteria	Antricoccus	826	555	1045	789	709	1065	1300	1458	376	396	395	2125	386	763	827	1299	905	1821	1266	678	761	1180	916	946	904	1125	785	918	682	776	1589	756	1505	736	725	298	547	340	430	212	395	636	531	355	309	350
Bacteria	Bacteria	Proteobacteria	Endozoicomonas	821	893	976	681	621	429	439	968	1028	890	1239	752	289	802	528	419	514	635	735	680	602	575	480	604	836	869	576	455	572	667	1060	817	795	615	918	1449	1594	844	1284	879	1806	1145	758	1206	1229	2287
Bacteria	Bacteria	Bacteroidetes	Fluviicola	819	627	790	451	469	399	286	399	3893	3319	1196	434	612	586	441	326	336	409	333	549	349	337	410	435	713	587	359	300	561	428	339	514	313	410	903	1149	1458	658	1422	671	1946	870	541	997	1163	3634
Bacteria	Bacteria	Actinobacteria	Promicromonospora	818	609	1051	831	788	1058	1090	1366	481	659	442	1989	423	674	885	1452	913	1763	1194	620	724	1142	959	982	1026	1134	635	945	748	783	1268	885	1348	988	1015	455	753	591	680	369	639	881	905	667	448	745
Bacteria	Bacteria	Actinobacteria	Longispora	810	493	1203	705	607	860	959	1334	743	603	376	1921	305	706	717	1091	909	1682	1219	550	711	1151	865	774	949	1075	639	717	525	573	1026	722	1599	741	575	245	553	341	376	252	481	1050	1437	469	343	375
Bacteria	Bacteria	Candidatus Kryptonia	Candidatus Kryptonium	807	835	928	1029	853	634	793	661	612	542	710	1313	211	1266	907	799	694	914	975	854	665	528	923	783	1059	1198	794	787	816	1059	687	1142	842	1036	1025	3094	3711	2054	3312	1908	4866	2383	1774	3072	3060	5889
Bacteria	Bacteria	Firmicutes	Carboxydocella	805	823	1173	1163	1077	1092	864	815	698	734	709	1463	176	739	858	1318	884	1452	1401	678	724	555	1122	918	1149	1603	763	1028	696	702	1128	802	687	772	1144	1363	1618	1146	1471	814	1872	1356	1002	1518	1136	2126
Bacteria	Bacteria	Actinobacteria	Oerskovia	803	476	893	617	674	941	723	1382	727	807	601	1716	310	693	713	871	711	1375	1046	657	609	974	763	785	884	935	534	938	504	763	925	680	1377	828	945	530	859	474	707	326	757	856	830	627	473	553
Bacteria	Bacteria	Actinobacteria	Humibacillus	798	527	926	583	561	794	779	1689	371	395	518	1740	284	844	791	961	813	1401	846	568	746	1206	688	803	809	880	554	1259	641	830	1090	1192	1876	1009	1658	181	326	312	405	261	284	632	466	349	289	240
Bacteria	Bacteria	Proteobacteria	Teredinibacter	796	804	1105	757	726	485	487	810	1828	1740	2652	858	616	812	603	495	603	632	713	777	516	527	533	595	823	862	564	525	690	834	1907	844	647	612	855	1736	1626	983	1865	1352	1928	952	880	1377	1946	3744
Bacteria	Bacteria	Bacteroidetes	Crenotalea	795	499	816	441	788	575	332	525	647	607	432	629	346	399	572	451	443	583	689	540	443	517	492	531	820	742	442	511	639	350	691	391	424	481	605	274	466	292	476	243	513	720	531	384	381	539
Bacteria	Bacteria	Proteobacteria	Phaeobacter	793	730	1218	819	869	687	683	1040	1125	976	918	1139	718	688	813	549	669	830	808	792	656	799	626	883	1080	1069	682	565	924	854	1060	864	883	983	693	666	820	741	822	728	1034	1067	1140	818	798	1023
Bacteria	Bacteria	Fibrobacteres	Fibrobacter	787	316	469	297	451	219	164	532	794	642	879	330	129	416	332	199	246	302	264	370	280	196	275	327	438	466	288	313	251	505	211	332	262	300	484	1347	723	539	780	363	1254	924	553	686	650	1138
Bacteria	Bacteria	Actinobacteria	Georgenia	786	600	1117	919	806	1277	1108	1490	530	582	564	2377	399	768	842	1466	906	1879	1458	682	820	1202	1034	993	1031	1212	733	1056	635	820	1356	883	1538	870	951	540	755	610	710	472	738	927	626	744	544	614
Bacteria	Bacteria	Proteobacteria	Thiothrix	784	956	1269	888	833	775	876	1107	1335	1168	1049	1304	481	938	919	623	825	1059	1007	871	782	763	803	1066	1102	1335	697	682	907	885	942	868	883	890	992	1420	1382	902	1214	579	1553	1157	672	1264	1036	1620
Bacteria	Bacteria	Planctomycetes	Mariniblastus	783	644	764	532	760	369	507	790	692	762	1250	787	219	598	485	380	605	569	664	763	599	610	451	536	679	613	566	467	393	744	712	807	635	468	782	1773	1810	747	1688	769	2131	1042	517	1565	1264	2097
Bacteria	Bacteria	Firmicutes	Lachnoclostridium	781	503	875	740	759	706	714	806	783	787	613	1226	311	536	678	825	653	1054	1206	717	576	784	744	816	875	1088	507	670	659	776	876	646	747	622	683	840	988	869	906	702	1323	961	991	963	851	1343
Bacteria	Bacteria	Proteobacteria	Sandarakinorhabdus	778	640	1090	736	814	463	401	828	879	864	1008	1031	854	556	808	512	561	627	862	551	406	499	597	626	705	764	424	559	862	578	717	477	520	596	486	478	643	498	660	572	774	720	777	606	768	1113
Bacteria	Bacteria	Actinobacteria	Williamsia	772	596	1064	765	854	1090	1056	1464	610	715	661	2321	389	885	833	1362	934	1877	1114	706	729	1232	837	1039	1069	1125	561	991	610	846	1155	853	1520	823	918	368	491	443	605	324	552	697	672	582	451	569
Bacteria	Bacteria	Cyanobacteria	Crocosphaera	771	905	1005	984	870	722	802	869	874	843	606	1217	234	687	847	832	841	1067	959	589	558	718	810	796	1111	1264	714	707	770	667	1085	723	685	739	541	858	1266	835	1072	622	1365	1296	983	1144	849	1453
Bacteria	Bacteria	Firmicutes	Faecalibacterium	769	548	785	637	677	513	473	554	422	555	576	797	178	463	530	636	545	756	879	530	638	548	582	573	827	1001	527	487	463	521	652	508	491	502	580	698	833	584	716	489	981	856	1102	784	751	1057
Bacteria	Bacteria	Cyanobacteria	Lyngbya	769	892	1061	827	734	674	783	1081	858	676	756	1262	295	905	730	591	759	883	1152	723	736	825	752	817	977	1338	804	646	682	843	900	951	1025	734	872	1024	1344	752	1215	572	1423	1221	859	1105	905	1457
Bacteria	Bacteria	Actinobacteria	Nitriliruptor	766	658	1120	897	821	1501	1077	1497	598	665	696	2499	352	828	953	1423	818	2211	1204	792	797	1313	932	957	945	1221	653	1171	571	965	1006	921	1617	810	1053	581	816	624	779	438	820	828	623	763	516	763
Bacteria	Bacteria	Cyanobacteria	Coleofasciculus	764	814	988	919	1017	840	815	862	772	880	607	1147	208	699	736	925	804	1033	1118	572	455	471	739	806	975	1279	558	722	576	610	747	685	685	611	795	911	1196	697	1024	636	1380	1067	700	1165	910	1424
Bacteria	Bacteria	Proteobacteria	Oceanicaulis	763	809	1380	882	915	599	609	717	1188	1351	868	1174	463	684	690	587	717	933	922	712	586	584	711	892	1059	1156	554	690	772	693	660	584	630	859	627	669	646	601	866	533	900	789	717	719	784	1034
Bacteria	Bacteria	Planctomycetes	Sedimentisphaera	763	667	978	568	618	326	257	438	667	932	1009	662	210	516	481	298	399	420	537	610	387	533	540	448	665	678	540	561	634	595	352	605	418	497	612	985	1345	824	1166	720	1558	1077	569	1129	980	1518
Bacteria	Bacteria	Proteobacteria	Aromatoleum	762	1263	1317	972	716	615	496	762	1217	1144	1048	892	253	1279	605	401	519	746	690	896	617	581	663	808	891	1225	514	533	612	834	638	775	706	869	1017	1470	1532	909	1434	669	1964	1398	908	1468	1368	1957
Bacteria	Bacteria	Proteobacteria	Thioalbus	761	1009	1335	989	899	860	867	835	936	817	736	1156	607	910	1003	757	877	909	1305	768	791	671	815	1167	1293	1410	785	601	1117	743	1141	753	634	941	690	1075	1146	856	1239	579	1380	1232	895	908	1030	1456
Bacteria	Bacteria	Proteobacteria	Methylomagnum	760	701	842	575	592	422	525	836	1023	842	881	770	504	767	558	519	602	596	600	617	876	528	468	573	916	1102	636	417	690	879	826	867	931	712	1078	841	977	761	910	496	1137	912	829	862	717	1181
Bacteria	Bacteria	Proteobacteria	Aquitalea	757	1130	1546	1076	932	742	578	781	1203	1420	1102	970	713	1065	921	505	760	909	979	837	599	609	699	905	1076	1272	586	625	742	752	1153	724	668	852	927	1102	1352	977	1176	662	1453	1443	1067	1110	1268	1571
Bacteria	Bacteria	Bacteroidetes	Hydrobacter	757	465	697	203	419	150	49	291	867	797	708	217	96	389	214	84	135	160	142	527	280	339	115	139	373	236	342	189	228	314	96	418	305	434	836	321	395	251	454	214	565	528	452	273	337	798
Bacteria	Bacteria	Proteobacteria	Magnetospira	750	862	1347	855	904	544	726	1328	960	884	746	1661	307	799	777	951	588	810	695	576	572	829	657	860	887	959	443	704	736	866	818	741	1023	944	863	542	602	580	764	343	840	1133	1180	795	792	939
Bacteria	Bacteria	Firmicutes	Pelosinus	745	919	1175	966	987	864	724	635	669	638	540	1210	201	663	876	1074	753	1241	1091	540	471	579	735	743	1057	1376	625	967	566	579	667	644	595	676	745	841	1008	747	887	506	1067	913	650	873	684	1103
Bacteria	Bacteria	Actinobacteria	Planobispora	745	438	701	661	531	1049	810	1034	273	378	232	2056	348	531	792	1189	812	1730	1037	484	611	943	774	745	836	1143	604	1055	537	460	1138	449	1200	666	472	252	299	297	269	214	387	490	495	322	245	212
Bacteria	Bacteria	Planctomycetes	Candidatus Kuenenia	743	648	794	852	794	766	778	1507	714	646	800	1277	372	1112	680	594	858	744	1154	959	832	1036	589	837	837	967	644	490	714	1127	1240	1229	1444	800	942	1061	1234	579	1199	707	1457	974	467	1018	935	1420
Bacteria	Bacteria	Bacteroidetes	Dysgonomonas	740	436	774	417	529	341	282	384	2581	2342	1506	531	342	364	402	311	354	399	379	761	326	320	371	306	453	550	243	315	698	348	4988	429	457	417	606	684	896	486	820	620	972	635	774	571	763	1484
Bacteria	Bacteria	Actinobacteria	Stackebrandtia	740	551	913	814	604	1158	1249	1373	405	493	362	2054	277	678	939	1299	1126	1905	1349	608	715	1147	911	1029	1050	1376	773	893	762	558	1574	830	1476	679	412	208	343	342	335	240	276	721	778	353	300	277
Bacteria	Bacteria	Proteobacteria	Candidatus Pelagibacter	739	468	764	563	521	393	434	749	2132	1448	1376	1121	376	524	525	355	532	536	633	807	834	813	542	504	642	600	425	537	864	1109	727	548	629	622	657	695	973	1325	1197	1318	1897	1455	883	817	936	1273
Bacteria	Bacteria	Acidobacteria	Thermoanaerobaculum	737	1082	1182	1064	819	712	606	526	582	700	847	638	168	854	683	676	753	814	921	749	460	455	687	635	988	1313	601	569	420	735	628	777	425	740	714	1452	1877	1402	1724	812	1969	1299	724	1705	1492	2181
Bacteria	Bacteria	Chloroflexi	Ornatilinea	734	1081	920	958	760	890	835	706	546	534	432	1099	136	802	829	920	908	1247	1091	664	496	595	856	875	1171	1406	791	693	666	654	832	992	649	861	901	2579	3521	1298	2208	1291	3516	2104	1426	2549	2131	4900
Bacteria	Bacteria	Proteobacteria	Crenothrix	733	672	977	596	581	327	399	635	827	618	1036	519	213	629	505	405	512	544	673	552	406	529	390	517	810	894	507	364	455	520	542	639	483	471	602	811	823	716	837	431	1076	820	428	775	795	1171
Bacteria	Bacteria	Proteobacteria	Sphingorhabdus	733	634	1255	850	1177	493	403	878	1523	1535	1911	1010	1212	717	930	468	658	702	903	625	464	523	626	784	866	864	444	637	930	616	1335	518	567	618	536	941	775	503	1165	683	1079	599	671	638	928	1537
Bacteria	Bacteria	Cyanobacteria	Gloeocapsa	730	792	955	659	725	628	569	634	323	448	494	824	205	648	591	558	542	747	804	646	459	555	632	578	860	925	581	547	595	649	693	684	621	688	725	1092	1395	988	1001	587	1214	1214	665	926	855	1423
Bacteria	Bacteria	Bacteroidetes	Aquiflexum	728	580	760	291	655	236	152	441	1543	1300	1640	413	119	397	401	205	266	283	276	562	369	331	259	247	452	429	308	244	293	355	145	381	360	497	717	786	1058	440	836	456	1042	786	439	564	654	1425
Archaea	Bacteria	Euryarchaeota	Halorubrum	728	685	996	742	692	602	568	735	566	609	540	973	192	699	612	573	687	929	916	587	494	631	652	677	811	1072	641	701	559	684	836	746	670	655	745	788	1043	846	975	534	1076	1119	690	1012	757	1182
Bacteria	Bacteria	Proteobacteria	Alcaligenes	726	781	1070	717	679	468	534	738	1150	1150	794	819	424	742	693	423	523	755	792	558	485	1633	440	676	756	739	377	532	731	542	1912	623	682	691	770	933	884	717	1073	508	1150	1819	1381	894	860	1418
Bacteria	Bacteria	Proteobacteria	Candidatus Contendobacter	726	891	1012	822	738	656	607	978	684	799	739	1204	479	827	856	644	652	839	856	775	667	667	681	859	893	1062	693	612	758	896	859	806	823	846	862	1095	1193	788	953	553	1244	1061	784	887	783	1346
Bacteria	Bacteria	Proteobacteria	Coxiella	725	537	683	517	583	369	447	492	2896	3739	1441	784	557	469	581	354	456	881	534	431	348	372	405	607	652	594	403	388	606	488	531	532	473	492	495	691	608	628	1130	787	799	803	542	810	660	977
Bacteria	Bacteria	Verrucomicrobia	Geminisphaera	724	396	750	516	363	390	384	596	2838	3100	1378	464	338	533	482	256	471	370	642	593	517	702	422	497	736	847	451	343	1041	455	577	596	582	608	507	672	761	357	730	448	1271	531	472	741	677	1295
Bacteria	Bacteria	Proteobacteria	Ferrovum	719	920	1167	805	765	639	886	1137	664	747	705	1283	582	828	785	575	793	833	789	641	578	630	671	943	979	1144	529	545	664	798	862	719	902	807	739	607	744	515	764	379	830	847	688	661	683	907
Bacteria	Bacteria	Bacteroidetes	Draconibacterium	716	458	650	428	534	283	339	446	1175	972	1053	547	277	446	408	373	369	471	443	547	395	369	290	449	560	542	388	304	638	508	317	519	447	453	557	601	911	399	702	359	891	685	412	641	688	1064
Bacteria	Bacteria	Proteobacteria	Ahniella	715	969	1484	832	1121	1116	360	633	1670	1284	842	913	1438	978	1186	532	792	892	663	926	709	542	666	777	992	1036	595	589	875	909	493	858	1043	1072	809	1689	1817	1193	2000	1081	1902	1683	1389	1541	1518	2079
Bacteria	Bacteria	Actinobacteria	Agreia	713	585	1146	589	847	1106	951	1698	389	483	386	2447	526	830	871	1228	1027	2134	1372	730	833	1710	822	1078	1046	979	702	956	758	749	1666	852	1789	906	690	299	379	364	390	286	343	637	560	365	313	407
Bacteria	Bacteria	Bacteroidetes	Paludibacter	713	364	636	287	516	241	133	341	540	539	652	279	158	305	282	136	256	237	332	429	496	335	242	247	415	428	372	264	405	377	187	307	268	256	450	547	825	409	521	356	752	615	397	423	444	860
Bacteria	Bacteria	Proteobacteria	Hylemonella	711	593	1308	768	700	501	483	658	1453	1479	958	734	649	598	572	429	429	646	480	577	406	412	483	663	623	758	353	432	460	625	504	491	501	683	713	1049	966	599	967	558	1254	813	698	859	952	1562
Bacteria	Bacteria	Proteobacteria	Marinomonas	711	826	1076	685	693	426	486	912	1026	863	1672	759	355	789	595	398	479	572	861	675	535	701	492	679	809	789	514	516	603	770	1026	809	555	504	811	1381	1240	712	1303	779	1501	960	655	1118	1362	2365
Bacteria	Bacteria	Proteobacteria	Pseudoruegeria	709	771	1061	655	602	648	522	996	677	785	764	910	263	919	591	394	490	686	784	657	520	705	549	578	780	922	515	584	528	787	868	818	837	700	770	786	853	617	888	610	945	867	785	837	952	1197
Bacteria	Bacteria	Actinobacteria	Leucobacter	707	590	1033	794	867	1317	1132	1379	379	581	582	2192	393	731	883	1552	962	1998	1379	640	822	1209	1048	1133	1094	1335	727	1005	897	756	2313	720	1415	918	715	345	604	449	453	310	518	746	613	468	362	379
Bacteria	Bacteria	Actinobacteria	Thermasporomyces	707	606	1024	865	757	1226	1082	1224	214	378	305	2035	267	773	944	1493	1032	1824	1436	610	632	1058	1068	992	1041	1237	599	1172	596	693	1283	745	1330	665	698	193	408	413	387	291	457	651	451	462	274	290
Bacteria	Bacteria	Nitrospirae	Candidatus Magnetobacterium	703	891	1068	829	725	583	592	630	646	616	698	683	191	718	618	534	631	774	987	613	566	562	541	685	901	1202	596	567	615	621	669	777	606	586	824	1074	1402	814	1169	690	1436	1029	610	954	1001	1850
Bacteria	Bacteria	Actinobacteria	Jishengella	703	391	796	636	630	730	746	855	806	752	379	1616	296	526	644	938	661	1309	992	444	485	765	777	669	698	831	486	694	441	561	1004	592	1174	681	798	406	566	510	502	276	506	887	993	455	372	421
Bacteria	Bacteria	Proteobacteria	Methyloterricola	703	791	813	653	593	467	562	1088	677	587	546	716	396	806	498	326	430	516	562	680	653	605	418	575	707	786	555	464	586	740	852	856	768	704	757	1165	1393	588	1152	476	1347	857	540	913	842	1133
Bacteria	Bacteria	Cyanobacteria	Phormidesmis	703	760	904	759	823	752	749	915	407	435	425	1216	341	624	709	776	720	1094	1001	596	489	715	751	859	809	1176	684	652	547	603	913	616	743	624	715	591	821	559	675	421	749	881	642	735	484	849
Bacteria	Bacteria	Firmicutes	Ammonifex	702	559	874	1031	881	978	816	732	218	343	446	1063	175	472	663	801	820	1017	1065	520	449	488	968	819	1039	1332	753	668	545	570	927	682	726	578	536	591	864	747	878	454	904	809	640	776	556	929
Bacteria	Bacteria	Actinobacteria	Haloactinopolyspora	701	346	727	623	736	1397	1080	938	376	390	337	2779	379	443	1136	1810	895	2494	979	359	473	842	877	1036	802	966	422	1067	549	517	1078	423	1142	825	489	167	370	198	278	164	295	435	408	254	179	307
Bacteria	Bacteria	Actinobacteria	Kineococcus	699	552	1214	687	801	969	861	1364	453	474	469	2283	413	687	930	1232	941	2032	1101	638	621	1098	913	1021	1066	982	540	1075	619	805	1178	841	1603	805	948	319	525	448	548	337	505	686	552	454	334	450
Bacteria	Bacteria	Proteobacteria	Indioceanicola	697	698	1349	883	1059	624	958	1317	850	714	645	1995	471	772	908	1352	678	1376	805	637	537	662	832	923	949	941	531	944	987	798	867	803	991	864	629	561	497	539	647	393	692	1378	2580	715	776	947
Bacteria	Bacteria	Actinobacteria	Thermoactinospora	696	271	602	574	477	686	827	843	352	335	259	1934	244	369	632	1477	735	1558	1076	395	388	722	643	644	575	728	366	816	311	412	1029	332	1072	611	299	119	282	287	321	164	185	430	376	222	148	202
Bacteria	Bacteria	Proteobacteria	Afifella	692	700	1006	726	660	533	583	974	812	743	662	886	303	892	600	412	609	626	698	700	654	771	547	747	806	825	565	480	670	858	695	788	746	639	727	610	800	493	751	371	810	748	565	621	591	938
Bacteria	Bacteria	Bacteroidetes	Prolixibacter	691	556	841	363	577	386	275	484	626	622	554	441	246	441	403	262	385	391	501	537	324	308	306	434	585	555	401	351	610	402	283	422	337	444	563	463	686	611	647	383	814	574	439	558	538	917
Bacteria	Bacteria	Proteobacteria	Nitrococcus	689	916	1104	1076	785	979	991	1384	658	672	696	1637	461	970	824	1167	1182	1148	1315	718	652	606	948	832	938	1166	579	936	896	1067	1023	887	952	990	846	757	984	703	945	513	934	1105	566	870	776	1149
Bacteria	Bacteria	Proteobacteria	Simplicispira	688	908	1220	599	570	379	394	488	787	1041	923	483	377	785	506	268	382	439	463	502	378	454	368	498	669	686	334	386	444	579	596	581	399	633	845	708	907	623	792	457	983	772	556	674	826	1368
Bacteria	Bacteria	Chlamydiae	Chlamydia	686	576	977	674	696	536	563	815	2398	1863	1433	1009	311	598	623	604	595	960	614	672	441	664	496	654	812	943	545	638	685	649	894	572	621	638	673	757	889	632	879	510	1107	906	723	988	714	1347
Bacteria	Bacteria	Actinobacteria	Luteipulveratus	686	407	805	731	639	760	719	1043	243	354	386	1401	263	483	602	735	654	1116	1005	427	485	840	720	659	692	884	470	846	425	537	596	666	1079	639	831	289	533	387	562	340	471	650	427	472	275	377
Bacteria	Bacteria	Proteobacteria	Chromatocurvus	684	927	2593	585	614	408	323	651	1373	1088	6911	735	893	893	534	360	409	458	547	588	442	313	449	534	599	695	326	374	439	741	847	706	461	591	858	1828	1497	761	1736	966	2009	1015	824	1282	1751	3194
Bacteria	Bacteria	Proteobacteria	Pseudohongiella	684	883	1049	455	417	298	326	482	2154	1693	1648	395	151	917	293	310	358	324	458	817	596	452	346	330	588	801	472	278	360	610	563	750	445	460	1184	1646	1602	650	1628	736	1854	945	957	1243	1283	2160
Bacteria	Bacteria	Bacteroidetes	Arcicella	682	450	651	284	444	151	93	319	1082	933	740	218	105	379	217	137	229	147	272	461	296	298	204	183	395	422	345	173	277	277	173	376	263	432	768	438	528	277	482	297	573	424	331	358	350	773
Bacteria	Bacteria	Proteobacteria	Sulfuriferula	682	1237	1176	926	563	594	479	472	664	788	788	503	354	1119	639	371	547	471	616	596	492	368	594	633	941	1186	583	396	555	605	613	769	583	705	899	1078	1397	950	1296	606	1613	1350	1060	1165	1102	1845
Bacteria	Bacteria	Proteobacteria	Candidimonas	680	936	1196	886	801	536	668	989	988	1029	1543	1018	698	957	738	486	757	989	962	659	555	2202	573	846	843	834	527	620	926	643	841	725	777	786	964	1090	1158	718	1193	489	1305	2003	1842	1128	974	1675
Bacteria	Bacteria	Proteobacteria	Advenella	679	1138	1225	631	572	400	422	724	1033	996	704	769	298	1039	546	302	511	640	734	630	458	796	479	574	706	927	403	421	461	647	795	625	622	624	823	781	952	517	911	355	962	928	765	814	769	1163
Bacteria	Bacteria	Verrucomicrobia	Rubritalea	678	429	648	444	407	311	314	815	2040	1530	1012	507	229	532	448	226	402	305	403	585	424	475	334	406	559	541	472	281	599	679	608	733	786	703	512	793	1170	712	1085	576	1398	826	538	1033	1046	1549
Bacteria	Bacteria	Proteobacteria	Desulfomonile	677	739	929	680	730	641	589	701	453	578	749	872	194	539	520	640	634	764	783	564	426	402	538	743	929	1150	696	540	559	685	701	794	601	704	588	932	1382	667	1090	511	1238	1078	639	1186	837	1270
Bacteria	Bacteria	Proteobacteria	Alsobacter	669	672	1071	625	618	443	536	1180	721	666	668	1230	389	909	663	455	472	616	545	623	618	768	582	635	768	740	407	550	635	810	744	732	941	771	909	506	617	360	677	342	822	934	499	566	510	676
Bacteria	Bacteria	Proteobacteria	Pectobacterium	661	688	953	688	742	502	473	842	636	790	659	988	674	634	868	443	747	713	1076	471	435	530	573	587	778	897	505	470	645	561	19161	621	659	576	567	703	752	1270	872	792	1114	987	771	861	827	1329
Bacteria	Bacteria	Firmicutes	Symbiobacterium	661	706	850	1064	782	970	978	712	399	669	445	1324	214	641	731	1309	864	1176	1372	615	520	502	979	852	1049	1292	604	823	603	594	984	662	691	835	532	747	1117	859	982	500	1175	920	700	995	759	1394
Archaea	Bacteria	Euryarchaeota	Candidatus Methanoperedens	661	951	828	1066	801	1004	994	738	258	371	365	1063	161	704	568	959	734	966	966	505	494	601	804	801	818	1247	684	686	504	589	865	685	538	611	531	966	1273	1854	1147	746	1621	1333	897	1307	868	1471
Bacteria	Bacteria	Abditibacteriota	Abditibacterium	660	521	718	594	537	345	302	414	553	478	493	563	222	437	481	355	479	546	675	429	325	377	505	436	662	747	400	524	474	414	550	432	366	460	477	673	1018	672	785	481	1131	913	346	905	753	1149
Bacteria	Bacteria	Proteobacteria	Rubellimicrobium	659	756	1097	841	787	637	665	952	1237	1205	831	1152	413	679	802	678	625	886	746	565	570	734	596	688	867	852	518	659	680	797	801	587	793	698	606	490	555	384	767	358	712	898	1004	640	604	893
Archaea	Bacteria	Euryarchaeota	Methanobacterium	655	629	821	862	770	850	941	603	389	601	565	964	184	518	626	843	799	1017	972	510	446	500	741	814	962	1300	553	640	558	488	745	613	526	574	525	811	1053	1002	812	527	1067	860	711	766	593	1013
Bacteria	Bacteria	Chlamydiae	Parachlamydia	654	691	900	695	633	680	736	810	359	373	635	823	263	518	594	536	647	796	866	663	482	612	555	647	855	1538	545	397	874	710	625	691	601	677	579	634	1101	857	1059	673	1376	1147	941	967	1048	2843
Bacteria	Bacteria	Proteobacteria	Smithella	654	724	745	682	625	529	487	524	360	346	527	527	260	593	475	382	430	567	612	556	404	372	475	606	722	907	495	379	466	536	528	616	379	531	526	988	1031	708	900	572	1160	841	547	855	719	1220
Bacteria	Bacteria	Actinobacteria	Klenkia	651	549	933	609	736	914	773	1427	364	466	702	2006	483	713	893	1119	986	1747	1095	681	681	1344	681	847	899	909	531	929	595	760	1082	808	1491	843	1031	338	561	458	553	389	480	747	772	482	404	697
Bacteria	Bacteria	Bacteroidetes	Parapedobacter	650	579	837	321	573	258	206	368	2557	2128	1846	483	242	418	455	244	369	402	394	584	278	380	275	357	544	535	440	348	336	402	355	440	295	424	609	808	810	431	841	412	932	614	741	607	703	1232
Bacteria	Bacteria	Proteobacteria	Wenzhouxiangella	647	901	1163	677	652	516	484	504	1389	1213	923	841	384	827	571	512	573	605	725	608	521	388	542	640	800	1006	545	368	662	656	499	652	647	785	686	1528	1331	860	1520	596	1622	1040	786	1093	1064	1768
Bacteria	Bacteria	Proteobacteria	Oceanibacterium	644	833	1362	857	759	563	679	880	788	735	627	978	356	830	635	614	611	584	716	589	527	648	652	740	923	943	562	497	743	752	691	694	796	762	793	883	1004	669	857	479	1123	991	991	973	850	1272
Bacteria	Bacteria	Bacteroidetes	Confluentibacter	643	546	775	346	558	285	282	311	1385	980	1093	440	155	342	417	271	359	477	369	401	281	277	294	387	561	675	390	396	300	329	192	353	196	319	619	630	815	371	656	363	700	537	402	527	598	940
Bacteria	Bacteria	Bacteroidetes	Haliscomenobacter	640	528	615	303	425	222	261	358	1197	945	1281	377	119	438	269	211	269	237	355	590	364	335	236	268	482	504	327	248	331	358	354	543	316	424	813	1109	1797	523	1207	563	1337	672	535	804	738	1724
Bacteria	Bacteria	Nitrospirae	Thermodesulfovibrio	639	789	874	687	790	567	641	474	451	598	497	716	362	693	584	779	622	786	808	625	445	455	612	644	899	1136	509	621	565	651	684	739	471	706	658	1692	1562	1053	1192	653	1653	958	758	1125	925	1525
Bacteria	Bacteria	Actinobacteria	Thermoleophilum	635	687	665	1368	750	585	779	1019	228	355	325	1502	226	832	629	2248	544	1485	1299	563	593	1069	794	627	730	624	437	1306	334	968	477	1136	1234	603	2143	1071	1340	709	1185	544	1171	1173	311	819	445	453
Bacteria	Bacteria	Firmicutes	Lysinibacillus	633	582	979	642	697	677	577	659	512	610	585	976	203	680	528	661	582	806	915	701	741	565	757	584	823	924	644	589	627	633	805	697	671	718	767	886	1111	893	1098	651	1308	1143	1312	1028	844	1593
Bacteria	Bacteria	Bacteroidetes	Fabibacter	628	477	581	351	452	303	252	458	3043	1932	2389	343	110	511	313	242	287	324	363	517	280	272	247	276	403	384	313	339	387	470	218	464	346	331	702	1329	1784	586	1363	573	1721	849	537	997	1053	1960
Bacteria	Bacteria	Actinobacteria	Propionibacterium	627	408	760	532	613	649	727	1062	414	485	635	1425	299	525	667	804	677	1266	876	570	550	864	647	720	763	810	565	718	507	766	895	612	1199	681	616	424	584	533	461	359	483	754	805	547	393	576
Bacteria	Bacteria	Actinobacteria	Thermocrispum	627	494	982	658	602	1094	982	1371	231	344	312	2298	372	724	917	1520	942	2029	1309	619	686	1198	932	1015	1030	1257	781	967	643	686	1583	686	1439	737	650	243	390	326	372	227	319	645	703	376	293	273
Bacteria	Bacteria	Proteobacteria	Salinicola	625	685	1056	647	740	526	596	1004	812	758	836	1069	464	776	690	578	585	873	709	543	502	542	496	653	674	787	484	557	754	804	730	712	760	588	751	998	944	617	983	534	1159	963	971	930	897	1438
Bacteria	Bacteria	Proteobacteria	Desulfarculus	622	594	686	715	654	506	492	608	695	624	790	735	202	652	562	501	598	558	782	557	403	432	543	548	845	885	436	417	536	501	690	598	547	572	518	1113	1383	914	1207	696	1532	1015	690	1155	906	1572
Bacteria	Bacteria	Proteobacteria	Albimonas	621	658	1023	729	702	444	526	860	654	623	556	1048	426	669	690	542	629	694	630	584	499	561	576	672	754	758	495	466	676	679	665	748	699	713	602	689	795	480	898	434	999	864	563	674	643	986
Bacteria	Bacteria	Firmicutes	Thermoactinomyces	620	557	877	831	898	1105	1177	1169	609	664	636	1819	290	635	950	941	834	1505	1215	568	626	665	951	935	1162	1390	616	928	695	695	1127	666	973	714	703	865	1060	716	1007	450	1297	985	777	873	635	1138
Bacteria	Bacteria	Firmicutes	Halanaerobium	619	616	751	599	582	575	535	560	369	530	559	778	167	533	479	551	523	820	748	546	358	559	544	630	764	870	563	570	481	500	764	616	593	539	542	948	1039	752	962	542	1239	898	617	896	716	1186
Bacteria	Bacteria	Firmicutes	Megasphaera	617	502	717	452	671	471	321	409	333	435	308	934	154	352	546	557	497	591	525	394	293	416	377	512	685	613	362	550	387	498	328	369	367	428	646	537	661	472	601	419	686	637	775	490	489	759
Bacteria	Bacteria	Proteobacteria	Methylophaga	617	673	1131	811	784	579	551	732	2151	1589	1581	1004	722	715	711	570	646	824	816	804	609	549	653	790	770	809	580	481	904	873	785	649	591	793	766	1339	1232	955	1217	667	1533	1112	883	1114	1178	1863
Bacteria	Bacteria	Proteobacteria	Cardiobacterium	606	636	956	592	819	537	471	777	550	603	510	848	305	570	680	423	547	781	660	551	444	543	479	658	836	894	479	482	584	603	722	371	520	574	500	549	697	459	607	371	760	653	618	593	622	777
Bacteria	Bacteria	Firmicutes	Tumebacillus	605	779	818	790	839	820	624	587	370	437	444	1137	197	556	657	944	646	1221	1211	509	448	629	930	700	941	1070	594	706	499	535	702	597	691	644	714	873	1185	741	1014	491	1361	997	702	1055	862	1262
Bacteria	Bacteria	Firmicutes	Anoxybacillus	604	714	858	771	937	779	803	788	579	801	1170	1109	199	620	797	849	892	1039	1389	585	511	524	732	686	959	1108	599	624	619	678	901	687	679	660	720	1049	1284	1238	1183	770	1377	1210	845	1107	935	1634
Bacteria	Bacteria	unknown	Candidatus Moduliflexus	602	654	670	525	534	406	433	514	457	553	426	621	148	625	471	373	440	635	526	501	348	378	477	472	702	821	601	429	481	529	662	568	425	543	527	1108	1121	617	905	533	1113	972	574	938	711	1238
Bacteria	Bacteria	Proteobacteria	Desulfatirhabdium	602	676	658	635	526	452	417	569	444	518	503	499	217	607	510	267	496	396	525	484	324	398	434	589	618	709	454	314	540	493	391	684	469	477	512	790	929	704	969	432	1144	873	546	732	762	1135
Bacteria	Bacteria	Proteobacteria	Thermithiobacillus	602	649	901	593	610	387	383	568	697	658	488	634	151	642	510	306	439	518	564	500	402	401	371	462	721	715	368	353	338	482	407	540	534	504	742	775	1077	667	978	515	1148	1016	586	921	754	1198
Bacteria	Bacteria	Actinobacteria	Dietzia	600	439	748	475	542	820	747	1114	307	510	437	1710	263	681	555	812	520	1288	796	609	695	1018	555	652	637	887	559	879	485	768	1155	874	1374	778	898	424	495	333	546	253	447	617	310	479	371	427
Bacteria	Bacteria	Bacteroidetes	Reichenbachiella	600	518	557	371	529	270	157	598	2352	1736	1819	387	278	382	362	192	271	265	340	432	265	290	278	265	436	449	260	296	397	414	221	412	247	323	600	1189	1492	512	1039	535	1181	650	448	953	753	1563
Bacteria	Bacteria	Nitrospinae	Nitrospina	598	644	800	891	694	822	888	562	409	507	417	1002	229	546	583	725	525	919	861	460	318	349	522	840	784	878	425	591	487	418	717	485	321	555	530	860	1061	688	907	493	1226	860	477	903	795	1241
Bacteria	Bacteria	Proteobacteria	Methyloglobulus	597	631	838	484	570	443	412	664	519	534	534	565	234	497	589	300	448	481	638	514	426	410	419	618	832	1007	595	352	786	485	655	560	407	417	568	792	952	553	925	549	1111	943	564	729	705	1058
Bacteria	Bacteria	Actinobacteria	Couchioplanes	596	413	1024	402	554	617	626	919	283	419	317	1136	224	561	643	831	671	1190	845	359	429	649	716	543	613	670	356	699	327	413	650	574	971	502	665	286	745	487	518	275	431	876	2802	607	553	534
Bacteria	Bacteria	Firmicutes	Caldicellulosiruptor	595	407	657	594	571	492	412	537	548	601	525	765	147	434	483	508	454	713	706	456	519	388	494	529	642	730	475	519	373	538	575	558	443	506	488	921	977	625	810	502	1053	853	607	836	679	1158
Bacteria	Bacteria	Proteobacteria	Rheinheimera	595	642	816	618	597	367	459	562	1001	882	829	675	414	517	591	340	439	608	715	552	435	402	446	592	701	780	364	363	430	574	478	543	403	477	607	1132	1002	433	1006	476	1217	796	585	813	771	1398
Bacteria	Bacteria	Firmicutes	Eubacterium	594	355	498	389	441	300	291	476	332	295	589	465	169	323	308	341	323	380	455	405	240	277	319	271	516	483	295	282	211	420	330	382	312	283	425	523	689	535	540	455	842	621	400	552	501	742
Bacteria	Bacteria	Actinobacteria	Planomonospora	594	361	822	627	566	1078	1027	1272	298	378	210	2119	369	599	768	1143	807	1870	948	546	678	1127	833	776	848	1003	591	738	626	629	1455	579	1487	734	409	153	287	227	272	168	245	516	405	225	162	200
Bacteria	Bacteria	Actinobacteria	Plantibacter	591	451	903	640	694	826	758	1120	328	394	457	1642	1095	565	844	1176	890	1673	1013	451	519	1110	731	813	928	876	525	896	989	501	1849	596	1221	832	651	280	465	464	462	282	471	964	1366	475	358	510
Bacteria	Bacteria	Proteobacteria	Robbsia	589	424	1367	636	617	494	454	426	626	497	420	585	724	332	858	392	1008	637	927	311	318	332	463	675	801	893	260	389	768	464	492	445	337	454	614	181	240	206	221	145	230	297	661	168	197	232
Bacteria	Bacteria	Planctomycetes	Rubinisphaera	589	396	688	590	628	366	452	613	430	424	475	686	194	294	486	386	575	678	660	373	332	440	398	488	632	635	447	389	301	474	555	417	485	364	343	639	737	313	738	326	876	687	524	633	591	997
Bacteria	Bacteria	Chlamydiae	Candidatus Protochlamydia	587	556	851	876	769	1256	1270	683	569	544	664	826	316	480	836	619	930	779	968	669	410	488	619	1150	1258	2341	417	458	857	712	781	564	437	489	406	512	876	1012	1033	664	1614	1331	875	794	1155	4479
Bacteria	Bacteria	Proteobacteria	Uliginosibacterium	587	562	601	623	516	292	392	681	851	734	604	409	372	535	460	286	375	399	473	316	273	227	359	421	520	761	276	342	359	394	411	431	316	451	442	589	631	547	640	386	756	547	594	552	1142	1276
Bacteria	Bacteria	Proteobacteria	Bacteriovorax	586	323	427	309	380	177	197	363	458	556	545	315	168	395	258	183	200	200	245	323	179	181	207	203	314	291	198	246	241	336	137	257	186	200	421	572	643	509	679	441	941	562	529	637	600	969
Bacteria	Bacteria	Actinobacteria	Thermobispora	585	287	636	538	526	820	694	735	460	331	196	2110	199	328	863	1371	680	1573	963	273	371	576	606	667	685	833	344	787	431	367	1371	394	1215	684	270	94	181	138	126	84	135	305	430	159	124	129
Bacteria	Bacteria	Bacteroidetes	Arcticibacter	579	348	536	279	408	185	122	394	1007	1000	714	300	215	232	304	189	254	249	216	275	236	260	183	233	371	301	192	240	358	299	167	334	245	300	418	318	446	271	449	191	456	493	346	354	290	722
Bacteria	Bacteria	Proteobacteria	Hahella	579	658	1038	692	690	503	498	553	955	906	1692	818	1053	668	670	465	690	723	762	659	395	526	473	632	697	903	481	452	702	641	1126	532	442	757	657	1066	1006	653	1108	698	1226	818	701	941	1071	1998
Bacteria	Bacteria	Proteobacteria	Dichotomicrobium	578	494	817	580	425	487	693	982	451	445	533	865	187	544	373	384	466	501	671	629	570	797	418	593	567	701	578	326	640	774	936	749	898	593	699	434	525	321	629	314	675	684	517	545	423	547
Bacteria	Bacteria	Actinobacteria	Serinicoccus	577	447	707	541	585	964	759	1128	380	413	394	1751	296	656	759	1050	740	1396	992	617	767	1075	700	783	724	962	577	884	554	717	1094	748	1283	736	761	363	486	484	584	371	593	735	450	553	376	484
Bacteria	Bacteria	Proteobacteria	Thiohalocapsa	577	707	957	589	637	519	458	679	670	675	661	898	289	587	580	375	559	636	555	773	498	526	438	560	673	807	483	436	498	607	616	577	666	525	805	860	936	602	890	457	1036	723	501	806	750	1139
Bacteria	Bacteria	Actinobacteria	Demequina	575	397	768	439	394	568	468	855	317	330	385	1000	185	459	493	718	532	835	639	498	458	716	466	618	662	656	453	512	363	517	661	560	789	543	822	328	373	373	397	198	485	474	442	351	350	470
Bacteria	Bacteria	Proteobacteria	Methyloligella	575	427	684	435	398	391	425	1149	299	340	456	819	257	793	419	228	406	508	493	806	665	962	350	481	557	617	368	334	462	980	633	861	1041	618	776	359	454	357	646	362	698	615	443	484	365	418
Bacteria	Bacteria	Proteobacteria	Pseudodesulfovibrio	574	398	757	571	727	533	564	709	720	589	543	861	176	437	452	612	537	609	571	420	413	428	463	492	611	742	405	528	352	654	617	452	463	611	405	605	774	569	742	427	884	766	439	756	580	784
Bacteria	Bacteria	Proteobacteria	Thiomargarita	572	720	739	652	573	419	425	589	1157	855	644	670	257	682	448	380	445	599	558	537	543	516	534	404	634	801	714	415	626	702	680	854	657	544	843	1072	1256	836	1289	623	1474	1176	562	1004	933	1602
Archaea	Bacteria	Euryarchaeota	Thermococcus	564	412	761	1247	842	1171	1300	611	546	603	557	1210	150	373	607	1027	793	1098	1359	487	653	404	807	1095	856	1118	568	711	565	648	997	492	490	542	358	736	1163	2152	990	872	1557	963	361	1052	806	1287
Bacteria	Bacteria	Proteobacteria	Limimaricola	563	547	797	480	482	439	381	574	787	716	604	760	229	554	420	416	421	580	462	433	384	471	374	392	551	573	364	399	403	453	474	486	511	420	574	659	700	383	696	396	853	675	541	590	619	907
Bacteria	Bacteria	Proteobacteria	Maricaulis	563	516	1025	673	581	367	475	500	1279	1150	780	902	442	612	533	480	539	641	603	529	395	568	457	543	728	730	377	372	625	523	557	460	530	548	485	773	720	638	767	465	926	644	588	716	717	1053
Bacteria	Bacteria	Proteobacteria	Desulfosarcina	562	399	601	478	494	358	372	521	502	428	404	455	169	461	428	258	426	396	546	383	285	320	344	457	632	768	343	326	348	359	392	480	300	423	411	752	838	564	805	416	943	633	316	634	593	893
Bacteria	Bacteria	Proteobacteria	Halothiobacillus	562	410	693	582	637	543	405	538	598	610	446	631	408	482	517	408	430	499	508	433	430	407	453	536	628	541	378	416	450	531	535	416	379	501	444	505	929	429	622	313	558	606	683	628	442	819
Bacteria	Bacteria	Proteobacteria	Kordiimonas	561	518	985	575	610	364	338	529	1077	897	556	584	609	507	578	299	460	480	687	550	446	458	361	511	768	792	480	362	507	430	494	462	406	465	467	632	723	481	688	321	784	672	653	591	558	960
Bacteria	Bacteria	Actinobacteria	Thermomonospora	561	434	920	739	705	1109	1228	1382	236	329	265	2283	301	687	845	1378	1018	1930	1114	539	599	1213	858	1030	1027	1095	584	766	624	717	1321	721	1475	784	511	129	216	263	321	151	286	492	534	235	194	296
Bacteria	Bacteria	Actinobacteria	Dermacoccus	560	323	466	281	550	593	443	818	253	264	257	2150	305	402	924	1064	489	1586	681	355	413	589	424	487	500	658	265	982	287	442	474	411	1063	758	510	157	217	240	299	173	248	415	216	267	178	176
Bacteria	Bacteria	Proteobacteria	Desulfatiglans	558	542	692	654	511	432	434	491	544	577	644	599	123	696	397	436	426	539	594	551	405	431	438	482	608	820	486	351	405	501	491	558	500	554	602	1004	1377	727	1054	563	1269	1118	500	1035	778	1323
Bacteria	Bacteria	Bacteroidetes	Fulvivirga	556	345	538	335	421	188	152	417	4923	2917	4508	213	141	190	315	249	243	191	326	456	210	183	228	222	437	400	225	199	266	295	213	246	167	252	594	1068	1303	311	1134	478	1232	538	490	704	853	1899
Bacteria	Bacteria	Proteobacteria	Schlegelella	556	687	722	444	459	289	191	373	697	1027	820	403	222	544	391	292	323	367	353	414	332	369	221	356	446	427	311	348	347	371	194	444	287	371	647	873	834	642	929	497	1201	810	523	809	954	1297
Bacteria	Bacteria	Verrucomicrobia	Methylacidiphilum	555	375	609	476	497	559	662	1151	401	355	261	978	389	449	561	393	458	530	558	502	537	581	447	685	656	709	492	343	743	806	1050	644	978	707	482	281	416	318	376	295	523	406	327	436	376	468
Bacteria	Bacteria	Proteobacteria	Sulfurisoma	553	760	1001	566	488	309	367	545	617	618	707	542	373	711	497	278	358	358	463	599	346	348	425	554	658	737	305	319	424	550	386	555	421	466	576	973	747	642	921	706	1429	742	507	855	1132	2429
Bacteria	Bacteria	Bacteroidetes	Lutibacter	551	533	687	393	472	342	232	384	789	922	766	450	254	417	459	315	411	355	490	450	328	321	400	395	563	649	415	338	484	375	311	416	284	460	655	553	721	443	655	375	890	621	437	623	641	1093
Bacteria	Bacteria	Proteobacteria	Desulfobacula	549	510	662	524	429	409	378	538	414	469	531	503	179	597	372	320	404	365	549	472	406	358	388	373	524	786	485	300	511	524	502	672	477	531	479	750	988	643	976	477	1258	801	515	806	703	1055
Bacteria	Bacteria	Proteobacteria	Oleiagrimonas	540	785	1299	861	1018	699	592	606	819	735	587	1203	1524	652	1264	763	667	1358	1063	651	519	4466	808	958	1114	1006	587	592	1120	794	764	561	915	1102	464	562	852	959	1166	555	962	1989	2962	911	882	1166
Bacteria	Bacteria	Firmicutes	Oscillibacter	537	420	706	487	631	517	492	490	388	396	397	792	164	337	468	531	520	668	563	415	474	384	448	507	667	656	438	565	421	535	421	432	425	401	655	554	706	333	479	371	645	516	326	581	359	680
Bacteria	Bacteria	Proteobacteria	Thioploca	537	442	566	423	398	340	303	447	364	314	302	418	133	316	337	240	363	364	498	251	269	235	367	368	503	561	249	214	231	270	266	340	312	339	488	603	686	330	602	294	748	526	637	513	489	824
Bacteria	Bacteria	Actinobacteria	Subtercola	534	350	804	460	554	781	610	928	266	342	344	1268	255	507	636	920	674	1237	762	432	608	785	558	678	720	896	432	546	521	434	1137	533	1012	640	592	140	382	292	328	212	329	514	731	530	376	344
Bacteria	Bacteria	Proteobacteria	Aestuariispira	533	586	927	771	752	421	532	768	997	799	551	1117	450	553	606	626	604	696	766	434	454	500	557	766	807	939	424	541	613	663	573	540	593	715	394	550	479	567	648	331	712	899	988	706	736	833
Bacteria	Bacteria	Cyanobacteria	Desertifilum	533	612	710	443	412	315	384	451	482	454	263	527	127	449	410	386	401	516	547	285	216	285	439	360	585	646	242	328	343	361	345	469	356	339	540	529	813	684	792	410	1005	952	644	706	680	951
Bacteria	Bacteria	Firmicutes	Thermincola	533	544	766	746	712	1050	587	529	444	581	440	813	113	417	545	674	464	778	976	373	317	341	628	639	733	915	418	678	370	403	497	443	391	475	494	841	1048	679	871	431	1171	658	502	915	721	1056
Bacteria	Bacteria	Bacteroidetes	Cellulophaga	532	406	612	319	432	176	143	279	1060	976	882	314	206	310	340	152	205	232	231	445	435	323	254	247	390	367	327	242	288	302	227	387	265	341	625	663	798	365	705	402	842	546	304	525	519	927
Bacteria	Bacteria	Proteobacteria	Spiribacter	531	421	619	510	473	378	397	431	690	514	588	738	575	399	568	379	470	649	650	359	343	335	384	592	574	626	327	344	749	411	429	367	294	518	364	615	624	428	610	349	650	690	666	538	578	774
Bacteria	Bacteria	Proteobacteria	Marinovum	529	349	813	507	417	308	413	579	368	336	253	512	122	408	320	343	454	521	404	269	231	305	378	387	541	578	344	236	349	364	394	346	390	321	386	329	355	263	486	239	490	415	457	364	362	520
Bacteria	Bacteria	Bacteroidetes	Tenacibaculum	529	356	569	323	315	254	249	499	1217	1039	792	361	337	368	293	202	238	250	322	451	311	299	238	242	383	378	312	226	414	353	359	433	377	370	566	775	791	376	741	368	945	720	678	606	599	1064
Bacteria	Bacteria	Proteobacteria	Chitinilyticum	528	570	955	463	485	298	329	458	394	393	372	398	138	504	436	247	408	346	552	392	343	290	293	460	811	913	381	286	408	446	268	355	300	304	468	497	722	435	606	313	759	719	481	622	494	841
Bacteria	Bacteria	Actinobacteria	Catenuloplanes	527	389	817	615	475	710	716	790	606	768	313	1405	186	429	523	877	757	1219	983	358	437	730	653	600	709	914	511	616	371	392	929	460	1038	583	461	112	327	318	282	212	337	662	733	359	260	240
Bacteria	Bacteria	Bacteroidetes	Flectobacillus	527	462	702	395	607	237	288	398	761	672	643	400	223	255	293	265	340	383	531	355	247	227	246	248	537	669	281	269	275	349	525	323	244	365	323	443	574	318	410	245	518	762	579	387	386	739
Bacteria	Bacteria	Proteobacteria	Geminicoccus	525	727	1169	752	822	635	537	1064	637	634	575	1054	622	758	643	494	553	668	756	608	732	632	530	608	730	931	589	547	607	648	598	689	788	633	609	600	553	355	667	303	689	844	676	609	575	727
Bacteria	Bacteria	Chloroflexi	Thermanaerothrix	524	578	746	668	720	638	616	556	375	370	285	841	138	548	674	818	535	794	854	419	377	323	642	586	798	779	468	542	428	505	521	623	504	545	475	1018	1628	875	1124	724	1630	1146	930	1294	1002	1952
Bacteria	Bacteria	Actinobacteria	Allosalinactinospora	522	603	814	823	605	936	887	1008	285	325	305	1496	232	691	646	885	772	1279	999	594	599	926	700	741	829	1027	620	603	549	685	1103	656	1251	708	596	399	490	510	430	264	560	705	372	537	385	472
Bacteria	Bacteria	Proteobacteria	Iodobacter	522	620	685	463	487	198	173	254	455	432	411	292	233	440	349	158	242	266	338	285	210	208	284	278	454	570	268	213	255	292	214	312	237	300	425	412	581	433	525	355	728	473	321	574	575	1248
Bacteria	Bacteria	Proteobacteria	Hartmannibacter	521	471	793	514	516	347	486	900	894	757	470	802	291	523	441	354	381	522	473	543	464	555	359	497	571	603	365	406	493	595	676	483	681	531	506	463	562	411	780	421	806	643	661	590	494	777
Bacteria	Bacteria	Actinobacteria	Angustibacter	519	295	519	416	406	576	547	793	202	284	237	1035	173	411	480	727	483	902	667	378	380	610	484	557	543	624	376	583	317	440	752	426	855	444	519	153	263	289	286	182	299	597	661	276	204	201
Bacteria	Bacteria	Proteobacteria	Idiomarina	517	472	855	583	773	388	376	527	1228	793	810	730	730	499	614	422	423	651	551	477	414	286	420	636	663	715	343	433	628	549	448	451	433	519	549	932	924	450	985	404	1084	749	597	766	747	1159
Bacteria	Bacteria	Chloroflexi	Pelolinea	516	595	515	598	524	491	474	442	391	411	288	658	101	443	450	514	523	602	623	515	324	357	531	548	708	864	530	426	487	417	653	664	362	576	537	1580	2328	869	1415	789	2071	1208	773	1703	1344	3197
Bacteria	Bacteria	Firmicutes	Kyrpidia	513	528	741	772	848	1004	785	624	273	451	340	1277	241	457	673	878	645	1068	1088	463	501	511	867	777	902	1361	538	737	599	511	1258	490	711	709	417	789	677	568	633	415	852	695	804	572	467	708
Bacteria	Bacteria	Firmicutes	Enterococcus	512	356	658	506	470	438	521	503	587	463	412	694	211	337	383	498	457	691	971	482	456	490	467	436	543	624	414	399	371	483	532	407	480	468	380	485	585	538	558	405	708	614	485	487	508	765
Bacteria	Bacteria	Proteobacteria	Oceanicoccus	512	579	1580	373	394	276	262	462	764	1736	14084	449	346	630	339	322	303	292	329	632	345	329	296	375	487	467	262	270	434	577	7665	546	333	484	598	3567	1381	1931	3515	3834	3964	994	1403	2430	6129	16964
Bacteria	Bacteria	Proteobacteria	Sagittula	512	601	819	639	622	427	375	577	902	872	696	769	388	554	532	502	408	643	550	457	354	456	426	483	703	756	403	460	466	544	569	490	480	571	570	634	786	514	689	359	829	690	540	588	598	860
Bacteria	Bacteria	Proteobacteria	Asaia	510	517	1103	583	554	508	616	1093	661	544	457	1317	558	520	528	691	548	767	794	509	612	786	402	532	735	688	437	542	844	630	755	544	1044	622	481	215	250	405	356	222	337	537	393	329	302	369
Bacteria	Bacteria	Actinobacteria	Terracoccus	510	340	497	387	308	386	447	745	434	313	327	1179	184	416	391	652	458	1077	1420	874	918	1937	635	318	566	495	533	1498	406	688	492	578	1210	740	1383	140	229	318	273	215	237	507	389	263	266	210
Bacteria	Bacteria	Proteobacteria	Ottowia	508	715	938	466	526	873	203	411	1015	1030	918	440	551	603	478	179	310	357	407	468	296	507	342	357	520	492	305	326	576	438	1320	367	428	437	548	582	733	494	872	453	835	795	590	690	823	1235
Bacteria	Bacteria	Cyanobacteria	Stanieria	508	333	513	362	369	239	270	576	313	287	424	499	204	376	353	283	349	401	405	320	230	359	302	374	547	583	415	260	340	393	497	454	460	340	314	521	564	346	495	194	552	477	349	501	415	706
Bacteria	Bacteria	Bacteroidetes	Catalinimonas	506	445	602	350	445	238	242	376	1931	1425	1283	369	176	401	328	215	318	238	375	451	317	268	291	295	495	490	285	333	303	357	282	376	286	378	657	954	1099	563	805	481	1129	769	462	846	727	1261
Bacteria	Bacteria	Proteobacteria	Mameliella	504	453	679	482	443	357	317	762	550	572	458	759	308	506	416	308	355	473	459	482	405	531	388	401	507	530	380	403	485	545	490	480	659	466	527	444	470	299	556	287	510	517	475	480	430	620
Bacteria	Bacteria	Firmicutes	Exiguobacterium	499	411	549	479	532	456	633	532	320	376	370	733	264	359	460	623	589	806	780	295	269	314	605	521	644	755	268	421	370	329	586	349	425	308	273	481	583	624	582	384	925	698	803	636	421	670
Bacteria	Bacteria	Proteobacteria	Magnetococcus	499	459	665	476	382	347	412	868	833	738	1280	606	149	356	405	255	399	317	618	550	423	476	300	402	599	639	476	247	480	502	605	551	838	533	639	407	413	279	483	245	555	477	318	375	353	476
Bacteria	Bacteria	Proteobacteria	Gemmobacter	498	460	691	520	430	455	411	865	505	445	658	917	300	563	435	394	407	633	520	493	497	661	414	517	574	605	538	344	596	687	589	470	650	502	508	518	535	481	648	336	853	684	601	691	565	859
Bacteria	Bacteria	Firmicutes	Limnochorda	498	393	703	674	627	836	607	530	282	508	309	1096	146	417	526	867	468	1055	840	366	347	421	698	656	700	951	463	654	408	484	649	471	513	546	400	438	591	421	512	254	542	647	476	488	463	531
Bacteria	Bacteria	Actinobacteria	Eggerthella	496	376	744	372	315	400	337	361	249	316	290	478	136	348	347	357	290	400	413	297	338	299	417	327	495	583	247	359	371	357	502	275	381	281	357	356	514	441	498	302	578	465	400	567	419	617
Bacteria	Bacteria	Proteobacteria	Desulfocarbo	495	498	825	588	411	411	461	504	643	539	348	663	116	482	441	500	566	569	691	408	338	347	454	515	697	987	535	452	454	440	542	524	427	456	389	524	651	555	634	382	914	617	542	677	552	1035
Bacteria	Bacteria	Actinobacteria	Marinactinospora	493	376	800	594	543	1150	1077	1394	260	306	285	2142	370	605	718	1151	838	2076	1131	568	685	1145	775	803	873	1052	538	856	554	614	1106	659	1492	498	472	84	178	219	263	180	231	494	296	215	201	193
Bacteria	Bacteria	Spirochaetes	Treponema	491	389	592	414	459	424	338	728	772	617	549	583	218	471	389	307	351	478	502	455	449	430	417	429	537	619	403	351	355	580	671	499	611	527	683	659	872	540	761	437	985	646	620	782	690	1250
Bacteria	Bacteria	Bacteroidetes	Longibacter	490	490	543	308	384	262	261	391	605	523	313	466	161	408	388	301	309	377	531	410	277	285	302	346	492	597	345	272	323	363	391	347	325	359	399	658	1003	630	852	452	963	785	542	796	691	951
Bacteria	Bacteria	Proteobacteria	Hephaestia	489	389	937	484	787	303	217	439	2944	2165	1068	577	1649	381	791	272	321	473	406	343	229	323	362	451	559	563	282	407	666	372	3483	340	356	359	463	484	449	347	529	510	710	581	700	369	610	1324
Bacteria	Bacteria	Proteobacteria	Acidiferrobacter	484	580	743	624	619	519	544	652	396	503	335	767	614	441	650	420	459	709	781	464	461	470	505	614	628	828	489	379	508	579	746	430	546	686	442	391	420	408	534	262	592	639	424	412	420	604
Bacteria	Bacteria	Bacteroidetes	Mariniphaga	484	442	498	333	312	200	154	249	804	492	699	267	110	332	225	178	211	235	279	363	183	247	224	192	385	453	388	164	256	313	226	383	242	337	527	596	559	403	612	351	846	425	425	602	528	1174
Bacteria	Bacteria	Firmicutes	Parageobacillus	482	557	708	612	634	673	752	534	383	363	290	901	157	434	531	721	532	846	845	562	625	510	715	683	694	1015	423	553	457	459	743	458	505	548	493	414	654	515	668	388	764	801	918	522	480	693
Bacteria	Bacteria	Proteobacteria	Xenophilus	481	464	803	311	483	320	266	490	925	1148	879	512	220	466	470	431	408	358	374	315	257	228	279	395	532	466	195	342	533	233	6981	328	312	416	520	552	780	304	617	307	751	481	374	546	697	814
Bacteria	Bacteria	unknown	Candidatus Vecturithrix	480	547	587	511	382	430	508	558	339	465	451	699	99	555	364	378	451	523	592	629	640	577	375	438	517	660	461	390	424	563	700	771	578	576	1604	860	1098	491	907	484	2128	955	455	688	627	1175
Bacteria	Bacteria	Proteobacteria	Magnetofaba	480	574	711	505	413	391	526	842	1074	1043	656	770	212	528	477	269	461	404	486	517	444	543	375	534	534	604	346	299	563	684	579	673	753	514	684	543	745	381	624	375	715	690	501	591	457	674
Bacteria	Bacteria	Proteobacteria	Oligotropha	479	577	914	545	518	511	603	1283	368	363	467	1398	273	795	621	565	394	682	439	638	611	949	571	626	618	575	375	624	536	752	754	677	893	533	684	326	368	263	394	221	398	702	1070	403	349	332
Bacteria	Bacteria	Firmicutes	Melghirimyces	478	451	650	474	462	503	481	602	225	284	191	770	126	329	369	430	504	750	675	299	333	418	521	456	589	646	369	457	380	418	539	404	547	411	330	379	532	424	476	263	546	553	362	453	372	591
Bacteria	Bacteria	Cyanobacteria	Aliterella	477	526	632	476	542	418	437	415	344	402	577	716	238	504	525	539	403	741	618	331	258	360	406	459	633	782	493	373	381	400	390	412	366	437	464	512	613	464	559	278	517	774	566	526	502	877
Bacteria	Bacteria	Bacteroidetes	Polaribacter	476	387	525	271	329	178	151	273	1337	1145	1116	305	256	279	319	183	233	277	274	342	241	212	220	231	358	390	241	222	319	265	212	275	226	305	343	681	744	389	640	375	766	575	369	508	562	1061
Bacteria	Bacteria	Proteobacteria	Sulfuritalea	476	435	506	487	343	282	305	398	1091	593	504	401	343	456	402	200	322	294	433	354	287	218	278	425	459	616	247	258	310	367	322	333	258	437	338	678	641	528	780	487	1134	619	459	589	839	1824
Bacteria	Bacteria	Proteobacteria	Cohaesibacter	475	637	739	510	405	380	425	834	537	637	427	789	208	575	374	380	420	640	587	520	552	642	409	437	603	692	393	381	855	627	650	589	701	495	681	526	586	404	632	360	652	568	377	587	447	638
Bacteria	Bacteria	Proteobacteria	Croceicoccus	475	421	863	762	667	391	485	598	1081	1018	1066	827	1179	399	771	466	543	715	443	368	341	314	572	566	599	601	360	444	891	354	1450	362	300	457	246	317	492	445	684	623	776	367	827	443	560	914
Bacteria	Bacteria	Actinobacteria	Micropruina	474	234	384	290	270	302	302	358	260	273	331	696	148	314	295	364	271	479	438	260	257	335	294	324	379	364	243	347	185	294	447	285	500	296	309	232	256	208	320	170	345	303	212	345	238	360
Bacteria	Bacteria	Actinobacteria	Umezawaea	473	400	754	610	494	808	822	1290	358	463	318	1788	299	638	602	1026	764	1476	883	548	669	1134	692	690	698	778	546	645	437	591	1115	657	1376	595	413	155	302	240	317	184	268	572	491	281	210	318
Bacteria	Bacteria	Proteobacteria	Xenorhabdus	472	432	783	554	694	411	378	438	650	606	452	822	1196	492	956	431	1200	689	988	460	419	452	462	608	642	646	394	450	842	483	692	381	476	454	322	424	420	357	608	328	638	581	835	454	419	661
Bacteria	Bacteria	Proteobacteria	Novimethylophilus	471	744	823	567	738	309	327	452	869	1145	610	380	429	647	583	307	441	268	504	441	313	258	373	664	626	675	276	364	669	554	361	604	381	517	644	892	1105	1000	1268	1604	1594	1112	2029	1371	1560	1807
Bacteria	Bacteria	Cyanobacteria	Pleurocapsa	470	456	581	493	410	446	443	554	448	569	421	568	129	404	375	287	400	441	577	306	270	377	477	417	559	641	312	240	330	446	540	416	463	373	497	570	769	461	655	344	852	637	478	601	554	950
Bacteria	Bacteria	Actinobacteria	Branchiibius	469	260	444	383	343	448	443	791	216	196	222	841	237	379	415	542	439	749	604	274	408	584	392	405	376	538	251	611	258	457	554	422	771	448	548	171	234	249	328	157	273	374	293	303	137	271
Bacteria	Bacteria	Cyanobacteria	Geminocystis	469	599	686	552	443	396	468	444	333	387	414	551	126	426	396	477	530	597	624	414	397	453	480	416	623	884	488	392	536	441	534	471	451	523	414	447	563	523	619	297	730	599	664	559	514	756
Bacteria	Bacteria	Bacteroidetes	Pseudarcicella	469	282	429	221	479	214	103	265	777	672	644	303	216	202	272	186	163	207	193	304	230	231	131	199	305	276	293	205	204	281	132	214	199	258	306	314	474	255	391	264	435	429	408	356	303	572
Bacteria	Bacteria	Proteobacteria	Candidatus Magnetoglobus	467	446	675	511	503	510	497	449	498	508	705	623	192	371	523	421	476	622	696	446	296	303	422	507	691	871	416	359	501	468	731	599	482	478	668	1020	938	552	874	473	1178	717	422	866	661	1320
Bacteria	Bacteria	Bacteroidetes	Arsenicibacter	466	374	560	312	512	226	220	343	1063	957	869	440	293	354	342	252	319	335	334	382	248	231	258	303	390	470	241	255	419	341	251	371	289	338	494	646	844	445	747	376	845	557	472	606	630	1097
Bacteria	Bacteria	Actinobacteria	Allonocardiopsis	465	331	637	453	482	1024	995	1241	143	208	187	2034	289	459	638	1097	790	1785	892	435	518	1073	726	837	770	963	466	772	508	463	1085	438	1226	537	616	108	150	170	199	127	156	333	291	219	109	146
Bacteria	Bacteria	Firmicutes	Effusibacillus	465	543	615	563	581	623	473	400	360	461	344	717	133	375	498	574	556	812	804	345	353	311	584	551	635	917	429	486	320	379	601	422	381	541	427	577	626	655	629	291	799	837	668	597	559	811
Bacteria	Bacteria	Chlorobi	Chlorobaculum	464	333	438	387	402	278	312	323	356	339	398	448	148	299	336	341	336	447	364	290	174	179	312	291	456	502	258	328	254	253	360	322	202	263	350	474	509	314	418	250	527	394	320	431	376	593
Archaea	Bacteria	Thaumarchaeota	Nitrosopumilus	464	2076	2070	2725	969	2493	3464	624	114	144	184	1316	750	708	559	2085	3734	5407	5314	2770	5297	3868	1694	1978	2384	6194	2763	551	5148	1214	3004	1692	1474	1419	315	1131	2176	2093	1412	998	1856	1688	568	1010	1037	1725
Bacteria	Bacteria	Actinobacteria	Mycetocola	461	352	713	484	455	878	770	953	309	363	220	1451	282	538	645	802	680	1417	764	488	526	1032	673	646	677	872	432	661	483	578	1183	544	1093	618	553	206	274	258	281	160	315	387	424	272	188	274
Bacteria	Bacteria	Proteobacteria	Cycloclasticus	460	630	1074	718	569	514	646	834	1138	897	855	1189	389	671	667	517	525	900	724	709	650	643	587	753	721	881	338	506	728	628	965	638	804	766	478	767	978	596	820	464	1095	748	689	711	744	1490
Bacteria	Bacteria	Firmicutes	Thermoanaerobacterium	458	399	630	505	631	677	722	590	219	386	305	1141	189	353	566	877	550	1089	833	385	358	411	682	639	606	974	387	622	456	456	817	403	562	517	461	472	596	526	536	321	710	661	642	502	425	837
Bacteria	Bacteria	Actinobacteria	Haloactinobacterium	457	326	595	381	335	242	221	329	115	233	172	389	67	270	253	280	291	386	491	271	268	406	271	348	451	418	232	460	216	240	164	176	339	207	292	109	308	270	214	131	194	313	170	247	191	219
Bacteria	Bacteria	Bacteroidetes	Eudoraea	456	435	624	355	461	439	344	469	343	237	390	379	103	375	342	260	319	341	655	394	309	345	397	445	709	827	529	248	438	356	677	383	445	269	398	440	591	248	336	147	436	389	181	286	269	469
Bacteria	Bacteria	Cyanobacteria	Hassallia	450	389	588	368	467	380	334	495	5754	5353	3968	583	180	317	340	365	368	447	478	552	291	333	368	341	514	673	314	353	369	323	520	378	395	323	503	1689	1198	415	1940	726	2104	758	1805	862	1314	2999
Bacteria	Bacteria	Proteobacteria	Fulvimarina	448	435	743	510	644	363	371	568	706	652	533	919	438	479	516	432	459	799	552	459	435	671	369	527	675	559	374	490	648	530	497	433	582	451	550	551	618	462	540	401	775	627	715	504	655	733
Bacteria	Bacteria	Actinobacteria	Gryllotalpicola	447	236	852	332	495	593	462	982	226	278	231	1067	256	330	481	661	648	1148	568	263	407	685	422	603	688	458	312	549	338	427	611	309	765	345	371	50	103	126	132	121	113	290	376	131	75	75
Bacteria	Bacteria	Actinobacteria	Hoyosella	446	481	732	548	501	991	862	1292	252	419	362	1978	304	648	656	914	710	1604	954	578	654	1144	755	783	800	1017	570	802	642	740	1193	594	1336	703	517	212	237	303	292	167	352	483	500	333	247	310
Bacteria	Bacteria	Proteobacteria	Tepidimonas	446	511	643	349	330	198	169	217	589	505	402	228	85	372	265	116	228	279	212	283	240	211	231	284	455	391	205	245	202	278	202	299	250	295	460	438	463	233	460	257	529	360	428	394	428	595
Bacteria	Bacteria	Bacteroidetes	Mangrovibacterium	445	359	548	283	319	192	204	279	571	485	501	300	196	327	281	168	230	253	259	266	217	206	209	263	494	489	257	252	287	305	196	309	223	336	311	376	499	392	573	341	624	389	308	450	475	811
Bacteria	Bacteria	Actinobacteria	Sciscionella	444	375	786	569	631	1021	903	1288	223	329	307	2136	358	636	764	1121	714	1757	911	540	695	1136	760	877	838	1037	490	785	552	645	1366	605	1386	763	503	190	221	305	308	257	295	572	453	315	218	258
Bacteria	Bacteria	Proteobacteria	Spongiibacter	444	511	1178	316	346	232	159	396	722	1313	11631	316	383	519	287	260	274	273	297	415	213	193	223	322	398	367	198	214	559	483	7754	459	301	337	522	3392	1381	1818	3367	3509	4122	1041	1313	2355	5569	16024
Bacteria	Bacteria	Bacteroidetes	Tannerella	443	359	456	288	389	236	186	264	582	800	536	384	192	269	312	262	288	306	334	294	246	206	302	312	396	419	214	252	253	306	194	249	224	279	336	307	420	310	478	240	516	420	386	457	383	616
Bacteria	Bacteria	Ignavibacteriae	Ignavibacterium	441	347	520	340	405	244	213	391	501	550	500	405	82	483	315	208	257	289	383	376	242	180	250	345	510	426	237	270	270	355	200	532	235	356	544	1258	1567	805	1313	728	1746	861	530	1112	1040	2132
Bacteria	Bacteria	Proteobacteria	Micavibrio	441	472	639	461	564	359	351	594	794	659	459	1458	468	475	672	383	389	583	543	645	432	414	382	493	623	549	372	630	2151	668	789	399	527	469	460	589	662	1301	865	1226	1454	678	1211	576	1232	1418
Bacteria	Bacteria	Candidatus Bipolaricaulota	Candidatus Acetothermum	440	429	634	530	439	579	432	408	219	314	299	623	121	496	395	536	471	576	754	367	343	317	510	434	597	837	355	414	294	325	442	396	380	377	299	600	650	566	554	344	692	548	274	477	455	679
Bacteria	Bacteria	Proteobacteria	Candidatus Tenderia	439	551	769	649	499	434	377	444	463	457	421	660	372	534	511	372	414	536	645	430	390	324	478	548	625	779	420	344	680	441	401	405	366	554	548	630	776	446	635	304	853	729	472	556	544	803
Bacteria	Bacteria	Proteobacteria	Desulfofaba	437	572	490	359	315	268	290	438	261	264	327	398	169	466	261	126	271	179	372	323	269	316	247	289	314	463	315	196	269	377	240	453	351	303	427	562	652	519	635	383	656	550	335	552	447	632
Bacteria	Bacteria	Cyanobacteria	Thermosynechococcus	432	389	590	382	377	328	294	355	232	266	237	362	68	377	359	313	397	320	621	365	368	397	373	442	659	920	537	248	517	364	604	416	417	379	472	369	444	341	443	189	540	448	467	448	372	488
Bacteria	Bacteria	Planctomycetes	Candidatus Jettenia	431	399	459	463	362	320	347	607	253	314	252	578	263	464	311	319	371	383	465	443	386	538	448	315	478	537	472	274	456	484	805	606	542	504	396	1687	1738	729	1270	494	1738	974	475	1140	946	1616
Bacteria	Bacteria	Proteobacteria	Thiolapillus	431	1212	797	485	271	219	217	275	601	599	636	217	32	956	314	133	262	164	420	607	399	471	327	264	420	643	273	218	261	419	216	514	343	353	602	415	492	405	689	267	749	647	468	621	476	706
Bacteria	Bacteria	Actinobacteria	Smaragdicoccus	430	311	487	431	394	554	503	806	248	236	223	1104	221	393	491	648	459	923	619	343	385	572	467	454	530	523	312	540	258	440	641	458	826	412	442	109	213	225	266	169	237	277	273	265	131	180
Bacteria	Bacteria	Proteobacteria	Undibacterium	426	445	647	600	709	433	434	427	648	509	533	598	559	420	569	364	419	509	434	319	217	251	335	621	620	616	269	368	406	372	384	350	281	464	499	454	451	325	471	241	486	544	613	402	449	593
Bacteria	Bacteria	Proteobacteria	Aquimonas	425	641	1047	517	705	454	319	380	983	930	614	559	575	604	631	296	391	398	480	640	487	338	413	521	628	578	426	340	534	603	308	598	605	671	681	982	921	545	916	598	1001	678	698	762	703	1092
Bacteria	Bacteria	Bacteroidetes	Flammeovirga	425	355	466	247	423	249	191	327	894	679	683	359	209	288	373	417	309	424	439	276	235	319	195	248	424	390	211	193	184	238	176	288	209	236	375	506	629	281	511	331	693	435	282	427	455	780
Bacteria	Bacteria	Proteobacteria	Malikia	425	334	859	547	353	390	374	362	690	686	559	435	184	335	305	233	318	357	333	313	249	207	275	476	487	502	238	257	336	284	304	357	230	353	351	341	431	310	430	164	452	357	315	291	340	546
Bacteria	Bacteria	Cyanobacteria	Alkalinema	423	441	515	380	388	312	306	425	285	350	302	474	104	340	328	309	371	321	476	299	213	265	300	397	467	486	290	258	291	300	416	379	363	232	336	467	577	377	497	349	717	564	477	488	413	761
Bacteria	Bacteria	Proteobacteria	Photorhabdus	423	419	639	445	473	433	400	432	442	591	429	619	437	362	583	382	567	1719	669	299	298	347	382	613	666	669	394	326	556	364	656	411	355	395	315	340	439	381	468	288	468	514	626	388	372	673
Bacteria	Bacteria	Proteobacteria	Pseudohaliea	420	466	815	430	541	353	401	510	598	720	1050	723	219	525	458	422	390	515	504	480	327	381	397	416	460	597	333	394	350	458	444	425	392	358	440	637	691	456	722	350	738	711	572	644	654	1002
Bacteria	Bacteria	Bacteroidetes	Gramella	416	495	543	237	265	196	190	262	1027	1002	603	360	136	368	257	211	229	224	265	490	357	325	234	229	408	409	247	232	277	323	248	408	303	398	643	495	837	376	721	324	815	572	306	516	571	1191
Bacteria	Bacteria	Actinobacteria	Arsenicicoccus	413	237	331	260	279	371	338	569	143	156	180	647	136	306	286	319	310	645	448	241	297	546	340	316	326	384	205	451	170	311	444	338	620	348	405	125	183	253	262	154	229	332	176	309	156	192
Bacteria	Bacteria	Actinobacteria	Tessaracoccus	410	308	556	350	382	548	423	654	324	254	251	932	203	357	425	505	445	828	584	398	375	501	403	463	568	541	302	530	279	377	427	384	631	353	425	310	406	274	330	210	400	549	301	346	282	403
Bacteria	Bacteria	Bacteroidetes	Vibrionimonas	410	213	387	93	341	75	22	215	408	481	388	113	74	114	139	31	97	113	95	204	171	174	78	88	223	134	157	94	96	153	53	134	163	203	309	82	180	90	171	99	234	328	237	104	144	426
Bacteria	Bacteria	Bacteroidetes	Capnocytophaga	409	206	342	184	229	162	150	200	977	927	691	246	208	226	195	158	191	184	334	314	183	184	175	174	340	318	184	250	470	252	162	245	221	168	381	635	659	329	670	375	791	547	316	545	562	985
Bacteria	Bacteria	Actinobacteria	Actinocorallia	408	326	634	539	337	783	707	845	333	210	230	1618	229	447	502	836	521	1335	780	386	536	733	590	681	713	951	363	478	436	406	836	426	921	477	281	183	162	132	182	131	190	263	199	168	162	197
Bacteria	Bacteria	Cyanobacteria	Mastigocoleus	408	435	444	446	393	407	404	559	179	329	247	761	130	319	383	731	410	591	605	344	335	378	425	449	547	615	411	419	376	390	617	350	461	351	381	417	602	393	607	258	649	545	645	469	439	843
Bacteria	Bacteria	Actinobacteria	Actinotalea	407	289	525	408	363	586	509	635	331	413	262	982	120	394	486	629	421	896	678	326	361	541	415	452	500	576	320	482	283	374	603	362	713	462	443	125	312	268	253	161	295	406	452	250	195	268
Bacteria	Bacteria	Actinobacteria	Candidatus Planktophila	406	334	634	410	503	804	778	823	320	341	270	1352	233	473	544	934	609	1150	733	441	523	786	631	662	736	872	424	684	482	513	1094	532	905	500	543	193	282	303	351	237	299	383	337	380	190	180
Bacteria	Bacteria	Rhodothermaeota	Rubrivirga	406	585	604	442	361	259	266	347	752	671	549	400	76	540	328	286	344	361	420	426	304	282	282	300	424	603	379	297	266	376	433	588	352	328	660	1144	1851	1009	1299	660	1686	965	645	1451	1098	1778
Bacteria	Bacteria	Cyanobacteria	Dolichospermum	404	609	648	523	493	386	439	453	258	381	440	517	159	459	462	443	471	534	589	334	306	324	439	423	557	797	378	362	321	321	355	387	308	341	498	599	695	351	492	277	687	588	244	494	488	636
Bacteria	Bacteria	Proteobacteria	Martelella	404	498	753	469	479	379	371	589	553	556	513	707	205	561	436	351	357	511	413	410	367	660	387	435	555	528	363	463	412	457	526	482	519	483	481	448	467	356	520	297	551	620	457	475	723	665
Bacteria	Bacteria	Proteobacteria	Bartonella	402	285	487	362	373	261	281	591	451	423	411	678	336	284	361	320	280	532	355	527	579	569	298	283	342	391	360	353	528	471	544	474	419	443	566	419	372	331	480	279	536	490	608	428	461	537
Bacteria	Bacteria	Bacteroidetes	Formosa	402	197	391	188	276	187	117	213	482	603	377	238	97	218	214	150	155	200	261	253	173	170	137	227	273	298	203	135	177	181	224	252	181	257	334	274	449	219	342	182	542	271	358	283	284	521
Bacteria	Bacteria	Firmicutes	Lactococcus	402	114	183	80	124	94	117	202	467	146	163	246	47	91	112	118	96	165	158	90	102	129	121	117	185	178	89	104	136	91	186	114	169	130	89	93	173	91	136	97	201	159	86	132	106	240
Bacteria	Bacteria	Proteobacteria	Campylobacter	401	307	542	395	378	287	278	378	531	501	432	545	157	330	360	294	307	318	309	327	270	302	277	411	453	485	224	374	437	319	242	308	253	301	449	533	562	348	506	344	720	491	543	406	469	794
Bacteria	Bacteria	Proteobacteria	Pararhodospirillum	401	431	1023	522	674	443	356	708	749	753	580	1041	451	484	569	572	379	712	433	391	378	420	400	524	576	502	304	553	674	499	577	413	476	512	392	411	474	326	555	308	608	712	721	426	588	615
Bacteria	Bacteria	Proteobacteria	Roseibium	401	394	602	392	381	291	289	791	221	231	273	610	120	537	480	195	347	344	376	381	391	474	315	359	471	454	260	257	287	518	418	470	748	397	489	188	221	180	195	167	335	358	297	252	275	347
Bacteria	Bacteria	Actinobacteria	Tsukamurella	400	302	572	510	430	692	562	820	263	298	216	1289	257	463	462	813	567	1031	640	422	572	776	477	622	631	615	419	606	323	476	886	407	927	476	491	183	306	247	280	221	324	425	352	284	229	309
Bacteria	Bacteria	Thermodesulfobacteria	Thermodesulfatator	398	429	475	218	287	96	94	220	133	149	158	136	34	296	187	80	163	131	184	231	94	153	167	145	302	238	171	128	130	279	98	302	192	147	384	311	439	250	261	160	380	291	184	296	260	381
Bacteria	Bacteria	Proteobacteria	Anderseniella	397	567	769	614	499	370	482	620	391	405	394	635	159	648	463	313	384	466	476	419	363	470	458	533	583	614	326	358	382	517	423	568	508	496	566	750	656	543	648	351	975	684	480	712	533	780
Bacteria	Bacteria	Proteobacteria	Glaciimonas	395	424	496	363	257	238	257	445	248	349	247	373	119	405	245	198	210	284	451	268	287	270	254	287	346	390	233	277	330	295	265	322	419	344	389	172	329	304	372	202	368	411	361	286	236	378
Bacteria	Bacteria	Firmicutes	Listeria	395	364	535	425	478	425	364	499	501	404	493	654	274	317	403	434	408	544	480	400	391	358	383	390	504	519	413	376	476	467	734	418	529	467	384	513	679	448	585	369	736	586	484	508	508	748
Bacteria	Bacteria	Thermotogae	Thermotoga	392	402	561	383	409	349	340	386	358	385	638	507	117	283	299	461	339	531	484	344	284	312	353	379	469	580	349	393	340	347	406	315	306	297	354	578	792	549	666	485	846	528	330	724	445	778
Bacteria	Bacteria	Bacteroidetes	Flexithrix	391	353	433	192	330	263	232	328	1718	1018	1216	289	61	299	229	231	189	263	348	320	244	139	253	273	398	435	199	201	205	230	272	288	173	264	268	607	843	287	636	276	685	425	353	462	498	1030
Bacteria	Bacteria	Proteobacteria	Lutibaculum	389	557	841	451	471	393	413	832	458	439	401	751	210	533	434	344	352	433	439	431	429	470	313	445	572	524	298	389	467	488	507	502	583	438	484	468	500	286	425	289	699	522	464	509	481	638
Bacteria	Bacteria	Proteobacteria	Xylella	387	284	462	396	306	325	271	407	562	691	439	440	327	324	395	271	424	716	506	322	275	293	356	439	494	494	289	254	476	346	678	330	444	355	261	230	299	255	360	211	404	346	1065	229	319	509
Bacteria	Bacteria	Proteobacteria	Loktanella	386	455	733	500	384	298	324	531	618	440	433	584	223	569	437	284	345	373	450	418	507	485	319	393	564	508	358	330	369	600	665	483	541	347	524	509	573	362	502	315	590	531	403	537	433	541
Bacteria	Bacteria	Proteobacteria	Oceanococcus	386	441	613	591	668	450	448	410	547	489	599	545	362	443	555	476	450	598	591	340	298	264	400	496	591	835	240	363	366	362	391	394	319	427	334	675	764	432	715	316	1008	571	360	593	582	948
Bacteria	Bacteria	Proteobacteria	Yoonia	386	397	487	391	372	406	292	388	442	484	400	445	204	411	316	286	291	459	352	343	241	315	328	352	427	465	337	322	337	346	431	340	359	357	393	356	355	227	430	234	546	454	348	400	374	618
Bacteria	Bacteria	Actinobacteria	Isoptericola	384	343	542	361	387	564	510	749	387	336	330	986	211	373	457	604	507	956	624	340	379	572	495	498	546	704	403	475	303	400	863	373	769	464	550	272	400	293	318	224	315	492	407	317	210	229
Bacteria	Bacteria	Proteobacteria	Sterolibacterium	380	452	686	462	490	313	280	449	890	953	777	552	498	447	372	307	384	449	384	464	318	333	403	468	536	597	311	332	382	486	545	440	372	507	460	786	664	514	697	526	1263	688	542	663	971	2072
Bacteria	Bacteria	Proteobacteria	Aquisalimonas	379	417	617	496	382	299	384	396	544	563	452	615	273	443	411	253	302	365	388	362	284	253	308	459	429	459	248	249	334	356	364	328	312	425	354	442	493	315	488	238	574	441	361	350	463	627
Bacteria	Bacteria	Cyanobacteria	Aphanothece	378	335	372	310	330	187	204	259	472	549	318	292	68	321	230	203	212	232	276	260	208	171	234	262	348	408	303	219	247	276	242	297	241	241	291	538	526	404	577	244	676	464	215	486	363	742
Bacteria	Bacteria	Proteobacteria	Thalassomonas	378	436	537	369	368	209	272	318	402	376	496	328	276	358	320	159	323	312	315	290	227	250	211	232	344	453	226	186	243	310	214	307	276	244	482	641	725	499	742	378	869	540	350	606	564	828
Bacteria	Bacteria	Proteobacteria	Amorphus	377	366	518	301	250	293	302	601	168	215	303	476	164	419	275	255	354	351	389	344	343	424	283	330	446	527	270	259	316	342	476	393	453	314	283	312	317	189	305	142	419	408	395	291	273	319
Bacteria	Bacteria	Proteobacteria	Octadecabacter	377	221	313	255	209	340	380	729	164	153	210	572	196	385	262	205	213	369	305	364	428	514	203	294	254	262	255	179	380	475	643	502	745	375	373	160	240	74	213	83	223	282	92	190	113	183
Bacteria	Bacteria	Proteobacteria	Desulfopila	375	325	644	216	264	228	128	314	443	410	364	325	87	338	245	217	170	265	339	338	201	249	228	214	393	460	264	197	188	252	239	279	267	224	312	450	572	286	527	241	661	398	205	479	488	654
Bacteria	Bacteria	Actinobacteria	Pseudosporangium	373	399	670	426	454	657	762	976	382	322	210	1419	238	499	595	790	656	1303	886	426	513	898	624	548	574	762	448	561	406	485	854	488	1058	596	417	207	337	291	322	210	294	589	642	265	223	259
Bacteria	Bacteria	Proteobacteria	Oleiphilus	371	449	447	266	272	239	197	290	611	520	916	361	345	450	330	171	166	318	272	384	298	248	206	256	332	358	244	210	347	380	466	412	264	325	558	851	920	534	890	526	1005	594	459	787	823	1284
Archaea	Bacteria	Euryarchaeota	Haladaptatus	370	382	493	357	360	349	401	527	190	221	248	607	113	347	335	390	423	509	450	267	278	414	345	368	405	547	316	276	329	374	450	308	410	375	445	244	350	602	436	302	460	467	294	358	303	453
Bacteria	Bacteria	Bacteroidetes	Marivirga	369	150	238	162	255	82	53	257	1756	1344	1491	129	68	139	173	83	98	70	103	293	114	127	74	84	201	133	121	82	130	195	149	182	115	169	265	734	681	172	584	262	624	332	215	400	437	979
Bacteria	Bacteria	Cyanobacteria	Crinalium	367	471	542	318	408	247	245	297	398	428	408	430	89	343	315	269	318	408	438	247	182	197	276	269	428	553	266	251	209	232	380	258	216	283	398	457	657	331	514	232	555	464	361	581	333	555
Bacteria	Bacteria	Proteobacteria	Plasticicumulans	366	428	699	591	507	381	419	381	597	587	754	565	176	368	457	312	361	426	463	323	229	238	325	582	620	563	289	299	393	366	404	371	330	361	464	431	603	323	559	221	607	534	346	541	481	652
Bacteria	Bacteria	Proteobacteria	Vogesella	365	430	656	343	280	188	209	307	322	445	528	267	179	437	265	186	261	321	286	408	380	351	217	271	378	421	247	227	341	387	272	293	298	303	342	429	574	362	524	293	610	500	258	428	460	684
Bacteria	Bacteria	Proteobacteria	Metallibacterium	363	322	649	562	711	492	434	417	188	184	163	923	508	200	812	544	587	1032	910	263	278	2074	553	729	686	655	350	388	725	247	401	184	432	530	133	130	200	357	383	181	261	968	1545	254	308	322
Bacteria	Bacteria	Balneolaeota	Aliifodinibius	362	386	412	328	341	332	357	344	458	388	285	436	83	352	303	401	364	361	497	271	238	256	409	351	476	603	365	284	306	283	568	344	255	294	448	731	933	473	653	311	805	630	418	682	463	933
Bacteria	Bacteria	Proteobacteria	Geothermobacter	359	332	433	359	358	326	330	386	320	282	237	505	163	380	268	299	258	360	353	331	221	213	296	364	372	452	275	261	243	385	353	375	312	366	283	668	620	488	615	359	901	583	484	570	579	871
Bacteria	Bacteria	Proteobacteria	Pseudorhodobacter	359	322	393	322	264	237	282	391	418	319	291	415	353	266	356	238	310	331	294	245	229	307	243	332	310	404	230	219	294	268	341	292	257	296	267	244	231	246	285	382	357	312	389	308	600	498
Bacteria	Bacteria	Actinobacteria	Sinosporangium	357	328	643	620	433	914	942	987	194	309	187	1751	247	489	595	1009	754	1436	844	422	469	862	673	755	703	835	439	640	433	484	1044	523	1176	545	349	129	227	175	330	137	221	448	335	265	171	187
Bacteria	Bacteria	Proteobacteria	Glaciecola	355	285	492	305	402	228	271	398	616	366	364	308	207	256	303	161	295	237	278	264	182	214	257	338	442	505	225	150	239	245	279	280	237	198	226	545	561	214	518	259	552	264	235	340	314	543
Bacteria	Bacteria	Proteobacteria	Aliiroseovarius	354	332	455	261	273	196	213	312	194	228	283	294	93	340	245	209	268	318	310	199	171	199	192	262	371	303	249	233	178	301	235	357	328	239	233	203	179	207	249	135	214	241	188	202	224	278
Bacteria	Bacteria	Firmicutes	Caldicoprobacter	353	280	384	364	395	275	292	219	210	286	385	395	69	263	273	310	335	450	366	237	224	261	265	338	384	476	216	338	157	300	212	286	251	257	448	429	615	481	590	309	662	602	504	630	446	855
Bacteria	Bacteria	Nitrospirae	Candidatus Sulfobium	353	504	481	383	282	358	333	401	388	356	393	426	139	579	377	329	361	355	538	373	314	339	317	351	493	630	347	258	367	373	460	543	468	456	508	880	792	574	737	354	1011	707	394	619	535	892
Bacteria	Bacteria	Bacteroidetes	Cesiribacter	353	408	438	288	361	219	151	300	1253	849	1050	397	181	349	261	201	213	308	298	338	312	281	247	293	374	326	228	243	190	294	219	325	273	318	504	759	912	521	834	370	1008	621	439	637	633	1106
Bacteria	Bacteria	Actinobacteria	Murinocardiopsis	353	209	519	348	340	570	543	817	185	230	134	1175	230	336	377	628	520	876	681	295	368	675	454	526	567	610	290	445	278	337	735	393	863	386	283	142	171	129	146	107	196	235	289	153	119	126
Bacteria	Bacteria	Chlamydiae	Criblamydia	352	157	194	189	172	155	175	298	153	227	212	272	91	206	141	111	153	172	152	219	161	143	107	191	193	233	149	102	171	261	263	254	234	300	206	194	311	252	299	138	431	305	417	183	379	883
Bacteria	Bacteria	Proteobacteria	Mangrovitalea	352	215	532	395	530	477	413	730	163	230	299	935	262	240	565	601	356	633	572	292	331	429	432	556	541	590	238	347	444	410	495	269	416	264	250	111	186	234	249	174	285	638	587	281	306	413
Bacteria	Bacteria	Proteobacteria	Candidatus Dactylopiibacterium	351	289	378	261	242	170	140	333	502	522	445	205	177	278	188	161	138	203	131	204	163	120	207	168	229	332	105	221	126	217	144	170	153	284	309	392	461	284	471	307	688	425	269	363	624	823
Bacteria	Bacteria	Balneolaeota	Gracilimonas	350	280	354	244	307	142	106	267	524	369	480	237	126	260	227	148	184	194	179	212	146	154	167	196	274	271	131	147	252	202	151	242	192	206	334	598	830	409	698	359	906	438	347	550	490	963
Bacteria	Bacteria	Proteobacteria	Epibacterium	349	326	619	359	338	314	356	522	640	1183	348	613	157	316	350	331	364	465	419	356	271	372	343	405	451	546	230	308	277	383	357	343	388	368	274	333	522	230	461	231	473	311	283	301	364	512
Bacteria	Bacteria	Proteobacteria	Immundisolibacter	349	417	611	550	451	427	464	509	644	444	381	668	274	404	373	446	382	536	577	398	398	438	500	508	506	697	368	424	568	398	576	385	575	501	307	673	525	271	493	289	548	484	298	395	366	595
Bacteria	Bacteria	Bacteroidetes	Algibacter	348	359	546	331	329	245	314	275	675	610	490	409	134	203	342	307	276	295	393	294	173	216	296	382	449	653	330	267	360	258	476	268	241	311	307	316	406	194	358	218	448	274	141	275	306	576
Bacteria	Bacteria	Cyanobacteria	Hydrocoleum	348	328	330	272	269	212	281	377	152	190	174	390	115	265	197	254	308	326	325	199	176	247	246	207	366	438	286	245	241	183	300	309	309	242	296	289	364	284	348	168	407	370	339	315	330	433
Bacteria	Bacteria	Bacteroidetes	Sunxiuqinia	348	201	334	214	308	153	161	261	600	625	542	267	74	197	215	135	175	179	163	291	176	183	182	180	235	306	219	168	173	218	98	238	213	194	245	285	390	319	369	249	491	222	181	405	325	577
Bacteria	Bacteria	Proteobacteria	Haliea	347	397	888	259	349	226	205	371	356	387	1580	366	207	489	265	175	233	239	313	263	270	239	228	296	367	389	189	181	289	353	415	380	391	281	409	643	639	322	548	286	776	430	301	494	521	939
Bacteria	Bacteria	Proteobacteria	Rahnella	346	354	574	343	397	347	325	589	474	492	422	667	390	405	342	214	378	479	397	374	271	355	283	339	490	474	264	324	326	404	11951	328	505	352	392	303	322	242	357	233	419	424	400	337	349	491
Bacteria	Bacteria	Bacteroidetes	Salegentibacter	346	282	372	187	281	238	148	256	713	690	903	285	177	186	223	167	175	239	221	262	165	135	238	234	286	303	165	232	200	214	130	301	150	220	367	427	624	306	440	237	449	405	252	384	340	633
Bacteria	Bacteria	Proteobacteria	Candidatus Thiosymbion	345	463	567	514	578	345	435	507	523	495	335	800	242	363	417	580	355	575	386	388	354	377	405	413	459	490	241	374	334	468	413	428	448	313	450	512	513	389	490	302	588	685	556	517	594	699
Bacteria	Bacteria	Proteobacteria	Oceaniovalibus	345	254	548	349	485	248	184	440	365	378	348	518	240	284	323	276	255	503	412	296	321	322	245	344	446	361	260	279	379	358	349	240	337	377	234	201	279	148	299	170	343	327	344	249	277	273
Bacteria	Bacteria	Bacteroidetes	Winogradskyella	344	281	346	270	291	168	107	188	725	784	406	213	226	250	292	102	176	278	262	322	205	159	160	141	368	337	205	199	240	271	168	209	173	270	338	563	660	359	616	302	746	463	392	500	537	1067
Bacteria	Bacteria	Actinobacteria	Pseudarthrobacter	342	234	377	385	331	581	434	524	446	515	233	888	165	278	399	669	392	769	531	234	298	436	333	470	403	533	227	466	270	280	561	317	480	318	302	211	305	313	276	145	260	376	216	246	198	301
Bacteria	Bacteria	Proteobacteria	Moritella	341	350	476	363	315	217	263	391	322	420	445	403	160	343	310	188	297	258	334	265	214	253	274	289	371	428	294	181	222	313	392	347	330	336	362	522	593	243	490	290	629	422	323	390	482	721
Bacteria	Bacteria	Proteobacteria	Rhodospira	341	416	515	358	339	247	312	466	264	277	258	644	308	346	284	273	284	347	370	309	261	284	349	292	379	432	229	287	287	364	402	332	379	325	482	348	441	333	315	197	453	417	351	563	339	569
Bacteria	Bacteria	Proteobacteria	Desulfotignum	340	320	457	484	395	264	361	340	573	565	493	380	96	380	272	328	324	299	340	326	254	245	260	363	398	416	382	251	307	384	350	350	322	339	381	510	629	447	639	368	798	598	345	604	572	842
Bacteria	Bacteria	Firmicutes	Hydrogenibacillus	340	308	475	332	296	258	239	349	293	374	400	403	76	249	207	279	194	318	349	267	260	310	229	246	352	360	303	280	228	319	333	323	342	251	347	481	632	458	546	323	721	614	343	619	479	585
Bacteria	Bacteria	Proteobacteria	Lacimicrobium	339	405	416	282	256	199	260	268	286	288	374	275	331	285	293	197	290	267	272	232	140	196	173	234	389	437	250	175	187	210	223	238	163	337	325	336	506	292	401	234	487	389	216	387	363	655
Bacteria	Bacteria	Actinobacteria	Microterricola	337	256	481	352	335	568	429	667	231	218	289	910	185	417	372	516	420	903	513	370	388	653	480	403	444	525	287	527	307	396	546	393	692	364	457	168	251	215	267	153	227	333	182	287	159	231
Bacteria	Bacteria	Firmicutes	Acidibacillus	334	229	523	527	459	685	708	554	173	246	165	944	147	228	514	753	532	934	828	246	279	318	743	562	513	852	299	427	321	262	701	235	453	318	235	88	166	300	123	135	188	300	381	189	147	197
Bacteria	Bacteria	Actinobacteria	Cutibacterium	334	201	453	359	343	356	366	440	169	194	180	622	113	244	343	435	333	586	438	232	266	334	309	341	395	380	300	368	212	293	429	257	450	276	296	147	259	178	263	114	213	323	315	245	185	216
Bacteria	Bacteria	Firmicutes	Caldanaerobius	333	253	361	260	367	295	310	216	206	292	532	444	64	195	306	340	285	482	409	285	279	211	266	258	344	553	392	267	232	203	318	192	189	309	387	215	307	304	233	220	362	344	165	263	289	439
Bacteria	Bacteria	Proteobacteria	Insolitispirillum	333	298	636	331	342	239	237	391	321	290	242	606	306	331	403	353	500	331	454	249	259	289	368	318	397	449	252	314	455	365	293	269	298	335	313	288	358	319	347	210	439	487	626	337	322	472
Bacteria	Bacteria	Proteobacteria	Verminephrobacter	332	520	595	274	312	253	183	426	432	516	395	292	157	462	288	174	197	298	340	316	220	332	204	273	380	355	244	173	262	353	375	258	359	363	437	288	340	173	336	151	370	219	145	277	310	468
Bacteria	Bacteria	Proteobacteria	Xylophilus	332	328	543	317	372	166	168	242	459	556	380	243	190	296	265	147	203	238	191	159	165	350	201	312	360	332	146	189	201	201	495	182	218	202	304	329	452	222	343	179	374	380	217	352	286	427
Bacteria	Bacteria	Actinobacteria	Agrococcus	331	288	426	414	303	772	500	633	237	231	243	1107	144	343	365	720	443	798	676	376	412	651	536	459	462	626	431	478	344	429	790	404	704	408	404	267	266	249	257	151	336	306	270	291	185	277
Bacteria	Bacteria	Firmicutes	Fervidicola	331	266	388	476	329	567	347	308	148	216	134	489	104	206	262	462	320	529	480	251	208	274	415	398	461	665	293	326	280	222	454	184	264	344	160	250	292	267	388	170	604	411	200	327	289	403
Bacteria	Bacteria	Cyanobacteria	Synechocystis	331	390	528	339	289	274	334	629	427	255	274	486	144	321	332	289	366	409	505	302	239	318	275	361	509	534	414	245	355	325	456	310	427	273	289	334	358	206	309	157	341	330	257	268	212	378
Bacteria	Bacteria	Proteobacteria	Actibacterium	325	368	528	421	341	316	336	424	322	304	328	472	118	410	252	208	289	275	364	303	305	285	226	346	386	411	253	279	229	308	267	390	403	349	309	370	426	346	366	186	473	464	235	384	320	425
Bacteria	Bacteria	Actinobacteria	Quadrisphaera	325	305	507	428	509	610	580	938	191	227	197	1399	259	475	542	719	573	1002	680	397	402	750	461	615	554	615	400	577	286	435	784	520	1123	431	511	187	239	197	237	209	260	429	313	243	161	224
Bacteria	Bacteria	Firmicutes	Caldanaerobacter	322	352	537	502	424	426	382	335	258	329	236	552	78	269	298	399	330	600	574	343	238	290	367	425	437	615	337	340	262	292	488	248	299	322	268	450	624	578	560	387	816	553	291	658	496	829
Bacteria	Bacteria	Cyanobacteria	Limnoraphis	322	421	461	320	366	278	328	423	365	285	254	436	113	262	330	208	345	350	525	263	280	313	292	358	494	632	400	246	311	304	544	318	333	257	334	409	549	388	564	310	687	571	366	593	413	521
Bacteria	Bacteria	Bacteroidetes	Echinicola	321	322	356	275	322	177	170	190	819	797	668	227	68	353	190	191	166	231	261	269	216	150	177	160	288	337	178	177	212	263	93	288	190	187	381	419	451	296	434	198	484	377	563	309	363	669
Bacteria	Bacteria	Bacteroidetes	Kordia	321	303	342	293	319	163	187	266	293	401	347	255	175	303	247	126	195	240	216	277	192	198	225	244	347	402	224	171	225	257	315	322	228	228	261	322	608	246	470	262	603	349	172	459	376	710
Bacteria	Bacteria	Proteobacteria	Castellaniella	320	296	423	344	296	221	176	289	192	291	355	277	100	304	231	226	489	570	773	205	225	16267	385	359	367	346	343	176	359	262	370	372	289	608	301	308	360	437	3153	205	369	13911	10319	456	339	523
Bacteria	Bacteria	Actinobacteria	Haloechinothrix	320	332	502	329	399	584	597	899	232	272	200	1315	184	423	427	654	516	933	551	391	418	726	402	461	477	664	404	401	338	415	710	513	856	459	399	207	182	165	236	134	192	371	287	191	156	193
Archaea	Bacteria	Euryarchaeota	Haloarcula	318	339	361	421	366	346	370	291	117	194	288	508	101	310	349	395	325	424	455	322	226	292	352	359	463	528	300	266	191	212	299	306	286	204	319	288	503	410	377	215	508	421	230	411	303	534
Bacteria	Bacteria	Firmicutes	Candidatus Desulforudis	317	367	479	458	486	478	358	305	278	414	298	640	77	299	446	618	348	756	609	312	259	261	391	460	498	702	225	456	233	303	327	289	255	355	303	600	578	555	592	347	860	552	568	662	537	937
Bacteria	Bacteria	Actinobacteria	Frigoribacterium	317	207	429	356	419	387	341	661	221	238	252	848	246	316	382	525	395	957	403	308	326	852	339	403	509	429	318	474	310	375	919	369	656	332	386	175	288	279	226	105	249	401	380	247	176	181
Bacteria	Bacteria	Actinobacteria	Mumia	317	246	483	264	378	492	470	699	209	235	235	1009	156	287	375	547	430	712	477	277	361	604	426	453	478	455	311	517	244	338	574	358	802	367	730	195	351	211	345	188	345	468	188	249	183	211
Bacteria	Bacteria	Bacteroidetes	Flagellimonas	315	278	353	193	194	158	126	182	756	592	434	171	59	258	163	147	128	227	125	232	171	131	157	160	236	212	155	162	164	198	160	193	194	194	325	430	456	267	446	206	622	368	230	342	385	735
Bacteria	Bacteria	Verrucomicrobia	Candidatus Moanabacter	314	606	538	485	383	323	309	437	534	517	479	529	108	546	351	300	468	510	433	392	335	421	312	360	519	582	384	346	326	458	470	596	587	430	515	639	786	546	639	419	921	624	306	677	493	953
Bacteria	Bacteria	Balneolaeota	Balneola	313	214	311	241	196	132	149	184	465	349	627	219	101	285	223	90	163	123	180	247	174	184	117	180	287	287	234	111	189	237	158	288	193	281	288	603	873	480	551	323	646	496	299	607	490	709
Bacteria	Bacteria	Firmicutes	Oceanobacillus	312	336	380	340	381	317	301	310	359	326	361	454	151	305	291	351	318	434	384	232	210	259	364	294	359	417	275	332	334	303	376	329	363	313	266	543	619	539	584	323	730	656	369	545	497	805
Bacteria	Bacteria	Firmicutes	Desmospora	310	365	477	408	473	437	440	377	201	366	430	647	82	294	368	549	396	575	648	261	204	244	379	428	454	521	251	381	240	326	395	312	298	434	272	609	654	593	603	352	782	749	462	649	511	876
Bacteria	Bacteria	Firmicutes	Anaerotruncus	309	368	446	422	476	371	353	379	408	521	697	670	112	362	385	707	322	509	629	351	364	319	381	365	467	563	312	388	343	420	591	318	361	305	417	542	568	343	499	284	657	483	528	484	412	534
Bacteria	Bacteria	Bacteroidetes	Thermoflexibacter	309	214	278	144	201	97	97	127	915	545	802	122	26	207	115	57	101	89	151	268	237	163	155	151	208	209	241	125	191	180	71	257	172	166	212	544	638	206	452	209	585	453	240	352	334	744
Bacteria	Bacteria	Proteobacteria	Desulforhopalus	307	301	520	322	329	217	230	242	216	208	148	324	66	189	289	176	314	241	252	181	158	198	194	238	380	410	287	190	279	234	240	194	221	232	224	412	359	373	369	232	449	334	349	297	263	356
Bacteria	Bacteria	Chlorobi	Candidatus Thermochlorobacter	306	330	343	326	408	216	226	294	643	439	552	452	108	359	289	281	263	263	288	354	243	188	202	292	455	421	254	345	309	380	259	383	309	306	418	1136	1277	721	960	533	1336	734	455	877	794	1398
Bacteria	Bacteria	Proteobacteria	Edwardsiella	306	294	415	270	346	207	175	331	365	384	313	357	119	339	270	197	249	302	281	299	301	331	254	249	334	396	250	270	236	274	275	328	306	311	328	389	439	300	442	199	535	549	320	375	365	532
Bacteria	Bacteria	Proteobacteria	Kangiella	306	380	575	385	387	247	301	332	884	800	618	522	275	359	365	290	322	409	458	298	270	274	269	418	423	548	261	297	491	333	421	303	240	363	344	1000	921	513	855	445	1014	620	365	713	698	1052
Bacteria	Bacteria	Firmicutes	Butyrivibrio	305	290	402	337	349	236	274	303	555	449	458	446	110	266	246	301	287	356	346	730	268	307	303	242	376	384	208	337	279	321	344	262	278	293	336	396	595	375	477	240	577	458	350	437	414	613
Bacteria	Bacteria	Proteobacteria	Enterovibrio	305	345	454	363	262	201	249	395	446	529	497	429	223	419	254	226	219	299	302	300	217	286	201	257	349	326	231	242	292	344	312	372	445	307	422	441	497	274	544	262	611	441	325	446	559	1331
Bacteria	Bacteria	Kiritimatiellaeota	Kiritimatiella	305	254	292	400	287	251	430	413	188	233	308	428	151	281	250	382	326	331	480	435	334	292	256	291	285	301	254	223	398	333	478	309	350	277	194	219	292	126	290	147	273	259	203	341	287	398
Bacteria	Bacteria	Proteobacteria	Syntrophorhabdus	305	266	375	259	248	251	219	306	309	258	322	355	82	283	204	305	236	298	308	285	269	293	229	275	302	380	255	252	215	286	218	403	280	291	287	811	699	441	454	255	600	403	231	459	404	668
Bacteria	Bacteria	Proteobacteria	Laribacter	304	544	560	395	193	152	153	160	566	548	472	172	174	582	202	128	206	126	254	358	197	178	210	165	377	487	265	127	198	264	258	317	212	364	414	379	535	379	602	282	642	733	410	391	489	845
Bacteria	Bacteria	Firmicutes	Brockia	303	216	378	341	341	292	382	263	210	237	171	525	91	151	299	318	332	409	338	158	176	125	259	345	326	406	220	274	189	165	208	187	169	142	116	219	281	310	249	156	330	355	211	295	175	331
Bacteria	Bacteria	Proteobacteria	Zymobacter	303	401	602	345	505	336	312	308	480	550	445	411	231	251	366	241	339	338	377	308	288	268	296	339	490	493	360	315	453	292	443	233	263	395	312	431	442	287	434	244	436	463	408	341	378	579
Bacteria	Bacteria	Proteobacteria	Achromatium	302	309	334	271	288	214	314	393	535	438	342	415	162	336	229	218	226	257	284	325	295	314	214	283	299	317	197	247	224	289	340	316	354	259	395	377	400	292	448	208	588	447	265	457	394	595
Bacteria	Bacteria	Nitrospirae	Candidatus Magnetoovum	300	354	450	354	354	271	260	367	356	364	300	379	198	304	286	290	290	361	337	319	244	372	244	296	376	421	283	222	282	295	329	284	297	342	310	313	409	221	368	215	474	387	473	303	356	525
Bacteria	Bacteria	Cyanobacteria	Hapalosiphon	298	354	462	407	455	278	290	313	234	378	254	569	107	312	320	385	396	537	406	203	182	275	406	368	453	522	293	351	267	330	396	307	384	317	262	289	329	408	451	363	598	564	376	365	247	411
Bacteria	Bacteria	Proteobacteria	Paramesorhizobium	296	228	335	242	315	161	169	410	217	223	144	318	165	201	250	158	211	258	354	196	176	232	215	250	308	350	150	203	151	214	226	229	273	244	175	138	181	134	161	103	174	247	162	179	194	226
Bacteria	Bacteria	Bacteroidetes	Mariniradius	295	227	263	87	207	49	38	158	259	278	260	128	28	158	96	57	93	73	132	192	129	112	33	91	207	171	75	44	132	116	49	167	97	148	355	206	358	122	278	117	329	255	158	200	210	444
Bacteria	Bacteria	Bacteroidetes	Marinilabilia	294	327	362	170	224	109	160	234	891	642	607	197	102	226	179	102	180	134	219	269	194	200	155	158	268	317	197	187	236	258	145	223	190	248	339	311	481	332	420	254	467	478	292	379	413	665
Bacteria	Bacteria	Actinobacteria	Herbiconiux	293	224	437	344	293	416	386	566	218	321	265	791	352	305	321	585	375	775	410	249	297	470	322	405	411	405	297	417	452	320	1278	327	580	363	332	142	180	164	148	99	141	255	442	213	101	194
Bacteria	Bacteria	Candidatus Riflebacteria	Candidatus Ozemobacter	292	213	331	209	324	174	204	221	347	350	310	296	62	237	226	207	219	220	190	327	186	169	157	262	314	304	220	187	208	218	169	272	199	218	540	403	577	374	501	280	724	421	207	548	432	728
Bacteria	Bacteria	Proteobacteria	Congregibacter	292	207	519	220	233	206	105	318	192	246	666	253	252	312	210	116	210	180	278	202	183	170	191	211	232	307	191	126	222	311	214	213	233	216	181	464	441	296	431	208	462	310	225	362	356	623
Bacteria	Bacteria	Proteobacteria	Zymomonas	292	199	437	204	315	142	156	345	173	638	263	425	212	158	301	204	290	319	223	194	150	197	257	264	400	295	148	279	350	238	176	160	183	237	223	155	160	145	179	113	149	243	190	163	145	145
Bacteria	Bacteria	Proteobacteria	Nisaea	290	323	536	466	369	223	315	416	289	242	224	657	281	335	299	309	308	371	265	226	253	294	231	368	356	433	200	279	301	278	367	294	337	302	286	275	286	260	318	127	319	556	398	274	278	370
Bacteria	Bacteria	Proteobacteria	Citromicrobium	289	293	558	353	419	185	212	282	1328	1215	550	456	447	224	362	254	340	319	367	189	160	193	298	276	454	462	237	231	354	253	879	202	228	254	220	289	371	255	414	222	450	368	453	278	411	569
Bacteria	Bacteria	Actinobacteria	Phytoactinopolyspora	289	236	469	390	311	609	518	834	173	264	222	1122	170	401	416	569	430	992	548	341	418	619	482	456	428	547	315	481	347	377	696	380	783	421	354	177	328	172	281	129	243	406	246	259	82	155
Bacteria	Bacteria	Proteobacteria	Amphiplicatus	286	258	491	382	330	344	309	336	642	611	483	516	307	406	325	296	295	334	377	388	326	546	310	350	413	532	280	270	390	320	437	269	271	410	382	487	418	311	532	247	570	348	364	400	359	543
Bacteria	Bacteria	Proteobacteria	Halodesulfovibrio	285	256	308	272	274	202	177	257	115	109	326	233	68	192	202	148	182	192	370	185	144	171	238	294	311	285	163	109	134	193	118	89	171	139	112	136	212	120	175	103	206	177	89	205	159	256
Bacteria	Bacteria	Firmicutes	Syntrophomonas	284	273	412	255	312	269	178	234	121	111	117	375	56	186	261	244	263	376	401	210	143	225	270	259	340	405	174	284	156	208	226	187	236	217	195	260	400	264	320	177	441	279	232	336	270	483
Archaea	Bacteria	Euryarchaeota	Methanothrix	284	236	414	463	418	467	585	295	97	152	124	522	110	208	272	353	469	384	512	314	231	268	315	454	532	580	262	329	202	256	523	267	156	232	256	332	523	452	358	239	500	405	231	367	286	560
Bacteria	Bacteria	Cyanobacteria	Hydrococcus <Cyanobacteria>	283	327	407	334	349	337	315	374	180	264	404	454	122	210	236	359	252	427	333	223	196	188	326	319	360	534	228	254	198	248	286	292	228	291	238	368	428	287	386	202	477	344	442	291	354	530
Bacteria	Bacteria	Proteobacteria	Shimia	283	232	301	133	165	172	149	369	371	275	236	248	102	213	142	95	116	154	155	252	227	206	115	135	175	236	162	133	172	206	202	226	279	210	296	173	160	141	231	130	195	220	333	217	222	325
Bacteria	Bacteria	Proteobacteria	Consotaella	282	314	474	377	400	190	257	380	179	239	221	450	290	207	365	211	232	311	351	205	208	250	296	278	313	329	242	207	345	259	474	250	295	273	311	189	198	128	145	94	207	294	364	231	222	318
Bacteria	Bacteria	Firmicutes	Sporosarcina	279	201	305	295	244	263	229	235	155	135	100	338	65	246	270	268	310	318	364	175	146	189	263	277	342	369	182	235	183	266	252	188	211	214	197	314	283	221	303	161	397	301	264	260	229	390
Bacteria	Bacteria	Proteobacteria	Eikenella	277	293	501	247	253	192	157	305	438	471	377	325	91	225	285	202	301	375	361	256	193	232	201	247	366	333	168	194	279	230	222	211	297	305	203	252	307	237	340	165	327	357	281	281	264	336
Bacteria	Bacteria	Proteobacteria	Desulfoluna	276	325	400	321	279	232	269	257	336	333	266	412	89	253	271	183	208	324	269	240	178	141	235	264	373	401	206	221	254	232	255	308	187	245	298	663	756	458	786	438	930	590	423	718	562	971
Bacteria	Bacteria	Proteobacteria	Oceanicella	276	267	358	283	339	324	334	389	167	230	184	485	148	226	216	324	258	325	343	264	250	334	277	298	395	486	265	244	332	251	404	256	274	246	215	147	168	182	270	139	219	278	163	204	233	320
Bacteria	Bacteria	Firmicutes	Clostridioides	275	186	242	264	243	251	264	244	279	251	259	373	82	168	214	319	236	357	380	199	193	215	262	242	311	348	265	219	220	266	342	193	314	274	300	224	247	254	256	138	306	377	709	268	227	339
Bacteria	Bacteria	Proteobacteria	Halobacteriovorax	275	208	214	184	137	103	94	143	298	208	177	162	109	179	130	97	80	116	122	163	126	77	113	118	169	175	162	120	198	156	107	203	96	147	213	529	576	399	627	395	763	427	341	513	436	777
Bacteria	Bacteria	Proteobacteria	Eilatimonas	274	291	346	245	314	178	181	373	750	431	251	318	356	192	245	156	269	221	320	269	159	212	191	259	346	335	201	153	269	286	265	205	266	232	195	308	307	258	273	228	381	363	321	216	239	315
Bacteria	Bacteria	Proteobacteria	Leucothrix	274	275	390	288	244	172	185	261	291	252	255	336	149	225	198	121	203	248	198	272	214	140	139	196	259	325	172	159	185	248	250	237	158	226	251	461	522	280	457	265	589	439	236	489	393	690
Bacteria	Bacteria	Proteobacteria	Thiohalomonas	273	258	395	292	289	202	214	281	430	346	370	466	182	257	289	167	271	326	426	212	258	249	229	313	310	307	242	191	296	241	218	221	234	345	205	364	401	236	464	244	476	329	320	330	393	627
Bacteria	Bacteria	Actinobacteria	Streptoalloteichus	272	223	412	354	343	558	524	603	196	174	189	905	167	330	354	562	396	808	467	252	300	488	347	366	417	608	275	436	318	233	584	272	656	349	264	141	176	222	204	131	197	319	230	200	141	224
Bacteria	Bacteria	Bacteroidetes	Cecembia	271	210	262	124	175	93	101	142	629	469	496	106	68	148	109	53	128	82	155	176	94	124	103	89	203	206	110	83	115	131	109	106	79	126	204	278	333	143	277	150	343	243	131	260	225	387
Bacteria	Bacteria	Calditrichaeota	Caldithrix	270	337	335	273	253	169	139	169	238	273	285	270	83	373	222	171	206	227	233	295	211	170	197	222	335	397	205	180	274	256	135	357	214	287	475	1122	1309	731	953	592	1476	696	582	975	871	1489
Bacteria	Bacteria	Actinobacteria	Sanguibacter	268	181	282	220	232	307	204	348	115	284	270	471	72	203	248	314	268	456	350	158	197	324	208	279	266	400	184	392	169	200	420	213	402	260	297	201	212	110	193	143	194	277	223	183	117	227
Bacteria	Bacteria	Proteobacteria	Brenneria	267	271	474	203	263	158	140	296	276	325	212	283	158	218	199	176	172	160	363	260	203	294	210	253	303	436	187	138	230	220	2409	235	240	213	188	151	184	156	247	153	199	257	293	207	167	340
Bacteria	Bacteria	Proteobacteria	Candidatus Desulfofervidus	267	394	404	407	220	271	233	219	130	212	264	269	55	306	219	235	285	238	327	201	144	179	211	229	395	432	225	179	196	219	197	266	174	210	239	491	496	449	455	250	556	384	193	389	323	509
Bacteria	Bacteria	Firmicutes	Caloramator	266	224	347	283	259	251	231	226	266	276	296	301	53	270	265	254	310	376	330	257	217	177	235	274	341	378	257	240	223	212	242	319	226	237	457	543	738	539	503	369	714	499	662	503	378	719
Bacteria	Bacteria	Proteobacteria	Chitinibacter	266	388	493	225	222	155	143	210	299	376	347	207	107	366	210	96	196	159	243	204	175	117	193	188	298	289	201	159	181	234	239	258	193	180	315	298	319	198	290	162	375	412	219	349	386	496
Bacteria	Bacteria	Firmicutes	Aerococcus	265	284	472	373	384	228	226	343	427	403	359	560	390	313	321	251	276	350	365	341	276	335	253	310	327	368	282	244	443	447	380	307	318	307	292	255	287	243	334	204	349	317	357	311	273	374
Bacteria	Bacteria	Firmicutes	Veillonella	265	203	302	262	281	297	194	237	225	288	426	363	121	171	281	309	201	375	323	265	183	185	261	275	336	380	245	285	146	231	272	270	207	215	287	455	506	341	423	283	735	386	373	447	427	692
Bacteria	Bacteria	Proteobacteria	Desulfofustis	264	363	457	311	241	288	318	394	432	351	269	389	142	344	387	203	245	287	394	276	205	257	220	309	414	447	303	212	320	325	415	306	301	289	309	572	760	321	711	298	754	570	276	642	535	791
Bacteria	Bacteria	Proteobacteria	Thalassotalea	264	357	348	297	285	174	143	196	403	310	441	250	176	294	195	142	206	245	273	239	231	136	172	246	279	373	246	161	259	194	191	298	233	247	280	649	615	273	541	240	726	369	352	447	442	964
Bacteria	Bacteria	Cyanobacteria	Chamaesiphon	262	267	422	241	255	278	320	335	182	231	166	377	92	270	298	291	300	358	353	210	184	200	331	322	333	422	201	199	225	232	384	244	307	281	246	466	489	389	393	258	471	462	379	328	299	455
Bacteria	Bacteria	Proteobacteria	Parvularcula	262	303	489	309	293	191	151	240	361	481	339	289	226	338	270	158	201	211	305	283	208	227	164	307	389	362	206	128	240	330	198	223	237	324	232	358	346	290	347	227	520	321	318	374	388	492
Bacteria	Bacteria	Proteobacteria	Marinimicrobium	261	294	447	317	300	203	216	227	624	552	951	278	365	288	256	209	189	248	349	240	169	157	183	278	334	329	147	157	211	272	458	193	224	256	259	554	393	247	578	391	645	302	451	401	639	1479
Bacteria	Bacteria	Candidatus Cloacimonetes	Candidatus Cloacimonas	260	169	229	248	163	228	199	138	278	207	253	231	61	209	213	230	207	292	301	186	148	149	227	200	247	351	167	191	206	194	167	268	168	264	260	384	556	571	577	319	543	446	209	569	342	690
Bacteria	Bacteria	Actinobacteria	Yuhushiella	260	157	272	232	221	272	367	345	104	159	123	512	77	187	269	361	264	430	275	155	163	300	210	327	292	317	203	235	187	202	348	190	339	185	265	97	132	136	131	124	178	187	109	98	132	127
Bacteria	Bacteria	Firmicutes	Marininema	259	232	299	363	296	222	240	239	178	320	197	383	75	224	204	307	255	419	497	168	161	193	293	207	316	389	212	245	181	229	274	203	201	189	172	171	282	322	254	202	274	364	127	323	219	306
Bacteria	Bacteria	Bacteroidetes	Myroides	259	225	295	145	209	101	102	185	398	393	421	147	75	153	129	74	80	109	212	210	138	126	105	106	167	197	174	94	171	135	1097	191	130	123	245	265	286	146	310	160	387	209	168	199	228	483
Bacteria	Bacteria	Bacteroidetes	Porphyromonas	259	172	303	216	241	146	149	189	341	330	449	245	179	135	188	149	192	235	220	229	158	147	172	190	248	279	213	195	215	225	181	246	166	167	205	383	401	275	441	275	488	319	272	355	431	655
Bacteria	Bacteria	Firmicutes	Virgibacillus	259	290	365	372	299	315	314	284	176	283	361	440	127	239	242	283	286	473	487	254	200	189	338	347	371	407	244	379	228	202	374	274	271	254	278	377	537	355	376	260	535	418	245	459	312	537
Bacteria	Bacteria	Proteobacteria	Arboricoccus	258	303	438	283	256	277	337	559	259	270	237	681	158	326	234	413	204	340	275	242	217	264	268	272	300	377	221	262	206	301	300	308	300	347	271	230	251	229	312	123	312	581	765	244	292	311
Bacteria	Bacteria	Proteobacteria	Dethiosulfatarculus	258	234	383	225	246	196	190	324	213	185	188	332	64	248	237	160	196	187	229	164	137	130	154	203	301	349	223	192	210	211	312	206	225	192	167	338	278	229	303	146	356	361	176	340	270	466
Bacteria	Bacteria	Proteobacteria	Methylomarinum	258	257	343	292	173	190	226	441	154	187	276	387	129	236	170	168	134	233	179	198	258	257	165	258	251	331	145	214	200	420	267	307	363	332	348	296	279	138	336	166	409	329	207	306	277	423
Bacteria	Bacteria	Proteobacteria	Oceanimonas	258	309	453	236	249	131	160	277	473	332	325	301	100	321	232	145	168	229	244	214	160	192	147	225	286	281	141	108	216	203	714	209	276	207	247	387	411	311	412	266	551	428	295	414	364	584
Bacteria	Bacteria	Proteobacteria	Pararhizobium	255	291	393	231	245	198	205	425	380	312	362	377	276	227	284	189	190	305	215	247	221	274	167	243	316	304	219	223	258	248	596	295	338	238	381	287	220	131	279	173	323	270	222	261	360	379
Bacteria	Bacteria	Bacteroidetes	Labilibaculum	254	290	229	137	304	68	93	148	378	327	362	143	71	196	163	71	162	168	179	202	130	106	105	137	216	189	120	113	124	132	104	151	92	137	238	297	319	152	314	156	387	231	100	258	322	575
Bacteria	Bacteria	Bacteroidetes	Marinifilum	254	270	322	227	271	122	129	179	525	408	766	201	92	225	196	137	159	165	219	236	166	150	138	176	251	314	136	146	157	185	153	269	179	191	449	678	777	384	719	381	873	473	251	592	512	982
Bacteria	Bacteria	Firmicutes	Dehalobacter	252	244	393	348	312	296	320	250	227	324	249	419	75	245	284	361	250	418	392	208	250	224	332	311	394	492	208	277	184	195	263	207	179	247	257	486	529	414	481	319	564	452	301	387	364	525
Bacteria	Bacteria	Proteobacteria	Haematobacter	252	280	321	225	290	159	220	370	239	229	261	393	193	260	213	136	216	256	265	226	196	249	191	209	282	348	196	155	278	231	266	238	283	303	267	272	284	184	334	171	327	228	211	237	248	403
Bacteria	Bacteria	Firmicutes	Anaerobacterium	251	221	554	395	325	283	296	226	48	133	164	299	40	92	261	351	353	337	346	131	87	126	265	322	525	517	273	262	256	134	434	183	115	180	84	72	133	100	132	97	212	407	568	167	169	212
Bacteria	Bacteria	Firmicutes	Halobacillus	251	238	406	266	326	256	257	255	184	347	190	384	101	241	251	227	256	372	384	226	321	250	257	258	363	387	236	271	164	310	320	215	194	268	347	273	427	356	445	203	454	397	232	376	270	434
Bacteria	Bacteria	Proteobacteria	Psychromonas	251	285	352	210	219	170	194	174	484	474	245	246	107	209	183	122	141	209	205	208	144	147	120	211	298	295	111	143	160	186	227	190	149	132	193	417	563	325	499	272	745	398	444	461	404	684
Bacteria	Bacteria	Proteobacteria	Silicimonas	251	243	331	222	183	187	177	543	328	201	171	484	100	303	229	141	173	267	160	256	223	310	200	210	196	275	179	172	209	285	251	272	323	164	307	179	204	89	229	79	215	226	148	204	106	122
Archaea	Bacteria	Euryarchaeota	Methanolobus	251	309	349	361	187	297	436	186	52	103	114	278	96	127	192	261	503	590	523	252	271	318	218	319	350	826	226	175	201	123	211	186	134	178	145	257	469	1081	489	387	716	352	221	353	275	494
Bacteria	Bacteria	Proteobacteria	Erwinia	249	225	379	235	296	246	235	287	380	384	289	388	395	209	261	207	286	363	360	261	235	234	210	286	281	373	178	197	301	270	605	260	293	248	237	291	253	185	254	137	284	280	343	246	224	381
Bacteria	Bacteria	Proteobacteria	Parahaliea	249	437	686	195	237	131	81	204	450	336	1923	215	279	377	216	107	156	178	169	210	184	142	71	167	171	245	112	159	202	238	158	269	204	194	328	668	572	336	693	377	666	340	222	430	559	1050
Bacteria	Bacteria	Firmicutes	Roseburia	249	146	227	211	191	132	158	217	233	319	174	272	87	183	195	184	129	242	223	178	124	184	146	183	215	259	130	184	225	239	187	188	203	261	227	246	276	224	316	196	387	344	233	263	258	583
Bacteria	Bacteria	Spirochaetes	Spirochaeta	249	149	254	174	190	144	128	215	200	111	184	174	59	154	145	108	144	169	144	178	112	132	142	164	231	246	145	141	94	222	97	194	173	132	241	226	282	262	329	186	394	272	124	221	253	421
Archaea	Bacteria	Euryarchaeota	Haloterrigena	249	136	214	221	172	167	250	193	141	152	139	252	21	125	151	202	174	278	248	111	113	99	185	208	198	190	144	152	95	105	140	165	119	98	147	190	222	235	216	163	277	185	219	217	196	227
Bacteria	Bacteria	Proteobacteria	Mariprofundus	248	319	459	354	368	203	223	235	431	785	294	369	164	259	339	306	229	381	354	226	203	219	250	356	367	407	215	229	437	274	328	299	265	392	355	567	693	343	579	280	567	436	313	431	342	626
Bacteria	Bacteria	Proteobacteria	Parvibium	248	165	250	191	118	104	49	104	253	271	133	125	49	214	142	58	107	75	182	154	121	79	112	106	163	213	98	94	95	162	125	161	140	117	133	245	224	234	268	143	308	227	177	241	285	387
Bacteria	Bacteria	Proteobacteria	Pseudoxanthobacter	247	306	473	310	346	298	294	612	386	324	276	629	204	401	308	252	273	316	284	266	258	322	252	313	319	378	253	234	369	399	449	351	454	358	325	191	251	149	285	158	300	385	354	290	257	344
Bacteria	Bacteria	Bacteroidetes	Siccationidurans	247	168	216	172	151	122	103	129	736	334	225	150	50	220	148	163	142	185	141	180	163	51	99	135	262	237	237	126	177	192	105	201	118	193	221	617	806	313	764	254	836	287	180	539	499	881
Archaea	Bacteria	Euryarchaeota	Halococcus	247	175	313	322	268	181	220	202	345	310	233	307	56	190	235	204	230	222	388	183	140	146	219	273	281	378	122	211	154	224	204	173	185	182	224	205	243	288	248	200	275	189	225	291	199	255
Archaea	Bacteria	Crenarchaeota	Vulcanisaeta	247	274	622	751	462	513	659	374	65	161	165	566	83	212	359	512	519	552	813	290	367	391	411	558	579	928	389	287	281	306	865	291	185	343	153	49	141	302	164	116	207	147	201	132	126	150
Bacteria	Bacteria	Proteobacteria	Arcobacter	246	244	345	273	308	229	209	205	408	509	372	492	170	246	286	300	226	343	362	221	252	244	275	314	369	420	248	282	331	316	340	282	264	356	163	421	465	265	469	288	544	423	251	325	331	542
Bacteria	Bacteria	Cyanobacteria	Xenococcus	246	180	217	123	136	122	110	199	171	237	228	167	57	165	151	131	102	152	143	101	100	138	104	86	160	171	119	113	104	191	101	217	172	100	214	470	404	153	320	184	342	286	148	281	215	352
Bacteria	Bacteria	Bacteroidetes	Marinoscillum	245	110	188	133	143	95	101	121	720	617	814	137	48	129	162	103	77	143	125	173	111	84	96	114	192	169	133	144	123	180	76	191	74	144	217	366	456	203	420	220	598	349	212	300	343	644
Bacteria	Bacteria	Ignavibacteriae	Melioribacter	245	214	255	233	278	151	128	223	412	294	351	259	76	308	229	187	181	225	223	280	147	142	180	214	323	315	206	247	162	211	141	336	182	262	258	600	751	520	659	425	1025	494	365	646	606	1020
Bacteria	Bacteria	Bacteroidetes	Nonlabens	245	198	280	152	193	139	135	164	467	527	495	176	66	193	167	100	150	256	203	189	136	196	154	181	225	240	126	122	253	183	140	208	152	154	266	400	545	237	404	243	446	320	178	279	302	611
Bacteria	Bacteria	Actinobacteria	Beutenbergia	244	196	296	207	210	304	264	384	226	271	121	543	53	236	206	305	276	480	337	206	225	338	230	282	288	360	193	296	233	225	409	291	435	255	282	182	239	171	223	106	228	272	213	172	186	215
Bacteria	Bacteria	Firmicutes	Desulfofarcimen	242	206	315	277	245	344	361	204	93	133	147	357	75	151	245	282	276	406	441	167	172	180	307	317	309	434	212	242	193	197	345	190	210	202	202	267	497	249	347	188	363	236	238	262	232	422
Bacteria	Bacteria	Cyanobacteria	Prochlorococcus	242	255	298	192	207	103	107	169	229	300	306	212	92	266	154	83	150	119	178	275	202	209	118	186	184	201	176	151	180	187	134	256	176	191	209	429	516	446	439	269	598	399	268	456	440	589
Bacteria	Bacteria	Proteobacteria	Tritonibacter	242	243	327	304	299	309	215	188	407	386	363	422	177	226	243	204	244	333	230	201	192	212	233	228	246	302	141	218	284	268	267	203	218	263	241	264	251	180	305	241	329	339	323	275	263	346
Bacteria	Bacteria	Bacteroidetes	Lentimicrobium	240	145	189	95	135	64	39	93	282	260	285	113	34	86	56	56	85	96	116	138	109	95	88	68	129	149	100	135	115	96	99	147	79	123	131	349	440	114	344	191	369	217	167	217	210	483
Bacteria	Bacteria	Actinobacteria	Thermostaphylospora	240	224	438	305	335	530	508	641	101	183	120	1070	135	298	365	619	436	866	536	228	348	545	384	414	417	546	253	384	302	324	501	282	808	317	240	60	129	122	151	107	114	305	190	115	104	121
Bacteria	Bacteria	Proteobacteria	Aquaspirillum	238	369	467	288	187	208	135	207	306	335	270	213	93	329	178	126	153	159	183	125	117	132	188	176	226	348	102	147	170	202	172	203	266	190	242	339	340	276	370	163	409	362	168	333	283	441
Bacteria	Bacteria	Lentisphaerae	Lentisphaera	237	139	182	128	208	60	74	113	404	308	501	139	45	126	149	73	132	85	86	154	100	71	123	120	142	175	153	108	129	139	106	179	116	144	141	313	488	211	446	245	647	305	153	434	393	720
Bacteria	Bacteria	Actinobacteria	Marinateneraspora	237	186	389	286	269	503	459	571	100	122	101	951	140	286	333	535	363	882	401	210	302	531	332	388	378	474	224	297	204	240	532	285	571	249	148	57	158	157	129	86	126	246	125	101	96	101
Bacteria	Bacteria	Proteobacteria	Desulfonatronovibrio	236	195	239	173	181	108	102	160	121	158	405	131	32	158	128	85	147	156	235	147	159	98	105	159	283	350	236	105	188	106	154	180	110	80	160	243	365	300	298	237	369	248	136	274	226	337
Bacteria	Bacteria	Firmicutes	Fictibacillus	236	267	365	271	270	307	275	292	207	235	147	474	68	235	267	315	211	509	378	228	246	256	365	226	259	435	216	250	188	252	376	244	291	243	233	336	441	304	329	179	389	440	525	328	236	477
Bacteria	Bacteria	Proteobacteria	Antarctobacter	235	359	471	380	311	252	250	492	232	272	242	490	143	403	288	193	304	311	357	272	284	324	275	341	334	405	170	200	297	373	335	332	357	284	349	250	403	217	284	182	369	350	275	263	283	321
Bacteria	Bacteria	Fusobacteria	Fusobacterium	235	202	310	204	224	111	124	166	184	189	277	198	70	124	165	113	124	187	165	182	130	116	142	140	196	237	145	139	134	195	128	135	147	142	111	217	326	214	287	200	404	259	158	241	224	320
Bacteria	Bacteria	Proteobacteria	Rugosibacter	235	182	291	280	201	155	159	195	158	180	142	183	133	307	172	125	174	183	222	199	180	195	171	225	226	306	98	113	167	170	147	277	157	205	180	368	265	336	398	307	595	300	281	267	432	1116
Bacteria	Bacteria	Proteobacteria	Zoogloea	235	279	371	323	256	215	253	192	166	145	212	295	172	220	265	201	169	286	224	141	140	97	248	300	319	332	118	218	221	154	546	154	105	233	253	340	431	182	283	117	318	300	228	295	227	365
Bacteria	Bacteria	Proteobacteria	Aestuariivita	234	233	494	217	205	203	217	569	88	122	105	396	117	240	252	102	144	206	140	260	268	320	219	207	252	177	124	188	169	279	213	247	342	189	194	92	124	43	70	82	97	133	96	79	74	117
Bacteria	Bacteria	Firmicutes	Alkaliphilus	234	308	345	284	383	260	268	215	387	374	359	323	81	245	269	259	240	416	355	204	198	176	270	295	333	453	201	292	227	240	205	267	170	311	301	777	609	400	450	336	711	453	301	469	496	787
Bacteria	Bacteria	Firmicutes	Hungatella	234	249	341	255	284	207	202	285	188	234	149	383	75	165	237	231	201	376	322	200	134	247	241	221	299	383	207	217	231	211	207	197	258	221	208	182	304	172	174	124	251	293	206	266	164	263
Bacteria	Bacteria	Proteobacteria	Marivita	234	273	371	237	204	140	159	499	353	313	297	398	186	305	271	139	218	266	289	239	242	256	183	243	262	266	170	203	198	285	633	301	325	204	304	245	302	186	243	202	312	288	230	291	229	286
Bacteria	Bacteria	Proteobacteria	Candidatus Symbiobacter	233	317	305	234	270	195	164	316	470	367	206	332	225	230	232	190	212	243	297	162	132	235	186	194	296	353	160	191	224	221	196	177	208	193	164	383	411	171	218	158	350	314	265	304	240	366
Bacteria	Bacteria	Proteobacteria	Litoreibacter	233	241	410	216	272	186	225	312	232	211	230	364	102	271	255	285	218	256	297	213	230	171	246	220	329	365	188	168	216	208	193	241	298	287	208	221	271	200	322	187	388	312	256	336	329	499
Bacteria	Bacteria	Firmicutes	Planococcus	233	275	351	412	301	392	269	302	263	240	236	548	92	283	255	311	286	459	377	222	205	230	266	341	322	447	188	282	236	266	316	227	311	292	239	412	577	411	395	288	557	440	229	491	423	573
Bacteria	Bacteria	Actinobacteria	Pseudoclavibacter	233	167	339	228	209	298	282	349	168	168	171	435	111	245	208	260	231	428	293	193	300	460	170	246	266	225	174	281	169	233	685	236	391	217	347	156	238	175	241	99	193	226	162	237	118	185
Bacteria	Bacteria	Firmicutes	Caldanaerovirga	232	161	249	199	222	222	187	194	46	152	224	268	63	181	202	249	196	257	250	129	163	187	206	160	276	282	161	192	111	165	218	152	169	157	118	228	273	171	213	90	282	251	132	155	162	187
Bacteria	Bacteria	Bacteroidetes	Leeuwenhoekiella	232	187	239	128	204	123	71	120	247	328	259	140	88	152	123	107	112	131	204	178	121	121	97	130	186	237	152	103	142	129	168	134	115	100	161	304	254	161	231	124	335	197	186	195	183	299
Bacteria	Bacteria	Bacteroidetes	Zobellia	232	172	267	165	257	136	102	172	454	450	435	216	114	171	189	131	153	152	215	174	123	121	128	145	206	216	146	111	135	147	117	199	104	171	253	389	445	182	321	194	365	303	184	307	352	531
Bacteria	Bacteria	Proteobacteria	Gynuella	231	188	331	273	285	217	152	190	110	101	135	207	556	270	317	180	162	329	307	175	154	152	176	220	280	481	235	136	194	157	235	243	237	195	210	737	866	291	549	201	634	462	255	481	370	566
Bacteria	Bacteria	Proteobacteria	Thiohalobacter	231	174	466	327	296	210	237	215	186	196	229	360	156	215	323	216	295	312	331	209	211	150	254	307	375	384	151	211	242	185	234	172	173	217	231	369	268	264	256	183	284	294	216	246	276	362
Bacteria	Bacteria	Cyanobacteria	Fortiea	230	164	291	249	206	177	259	292	465	376	149	294	79	203	188	233	166	263	305	185	141	153	157	282	239	332	155	145	181	221	176	219	210	160	218	154	254	175	242	138	275	257	282	272	217	308
Bacteria	Bacteria	Proteobacteria	Limimonas	230	327	496	371	335	303	325	390	359	340	245	649	213	318	305	272	285	291	332	252	270	325	232	310	358	368	250	237	424	330	343	321	367	383	208	216	225	249	313	211	377	438	546	312	347	552
Bacteria	Bacteria	Bacteroidetes	Rhodonellum	230	201	181	91	91	46	72	104	812	698	438	65	18	128	92	52	103	81	98	108	53	77	83	60	174	149	81	61	89	94	77	222	83	110	210	279	417	137	331	144	368	237	133	243	212	466
Bacteria	Bacteria	Proteobacteria	Roseospirillum	230	208	511	336	252	171	140	310	253	213	250	325	280	236	187	152	320	189	272	205	175	200	155	230	305	288	163	193	411	262	263	212	217	240	297	199	217	256	239	112	321	266	185	275	222	328
Bacteria	Bacteria	Cyanobacteria	Trichormus	229	217	296	202	217	175	211	220	142	207	204	321	65	224	149	205	208	274	361	138	83	166	242	236	267	350	172	195	145	181	288	192	236	207	253	386	454	229	356	155	432	448	466	360	295	651
Bacteria	Bacteria	Proteobacteria	Microvirgula	228	230	407	275	226	160	196	164	261	251	307	248	150	206	227	117	190	153	173	225	114	81	127	238	265	331	124	186	177	210	163	185	185	151	257	262	286	199	287	163	284	258	193	253	235	389
Bacteria	Bacteria	Proteobacteria	Alishewanella	226	182	325	151	153	108	91	181	504	436	370	193	126	231	158	83	122	138	165	253	162	131	99	128	202	209	173	106	159	220	131	207	156	160	241	405	429	207	392	202	489	258	264	301	341	608
Bacteria	Bacteria	Proteobacteria	Fulvimonas	226	312	408	358	367	316	263	259	277	204	175	439	647	222	528	309	445	1046	691	247	169	1896	331	383	349	332	275	280	393	196	531	199	675	496	152	193	263	195	349	170	262	508	930	300	278	395
Bacteria	Bacteria	Proteobacteria	Halofilum	226	261	340	234	192	156	167	260	264	229	319	308	67	242	275	159	234	228	334	150	227	179	176	272	258	246	151	156	170	161	178	168	167	193	196	348	349	121	300	118	311	272	340	179	216	322
Bacteria	Bacteria	Bacteroidetes	Indibacter	225	279	281	78	93	88	67	269	179	198	158	185	42	312	126	41	76	81	107	221	205	253	77	83	95	108	162	57	125	268	133	361	330	241	549	52	102	150	113	67	133	117	77	106	109	144
Bacteria	Bacteria	Bacteroidetes	Longimonas	225	295	274	157	203	139	139	201	279	333	472	212	55	153	143	119	134	153	162	170	129	178	109	142	185	272	132	176	129	187	208	227	223	220	266	392	587	314	462	219	579	317	252	358	288	492
Bacteria	Bacteria	Bacteroidetes	Microscilla	225	304	282	188	209	96	96	161	326	347	334	138	40	197	137	92	126	139	127	130	109	134	124	118	191	187	114	159	123	124	116	215	143	156	327	355	524	277	459	223	451	379	197	370	293	586
Bacteria	Bacteria	Proteobacteria	Sneathiella	225	241	427	254	219	241	178	291	232	216	231	321	114	265	214	151	190	157	286	180	180	152	197	185	293	406	173	165	252	224	287	214	267	277	147	118	166	152	189	108	227	233	234	182	250	386
Bacteria	Bacteria	Proteobacteria	Methylocucumis	224	216	372	318	253	222	282	270	186	163	143	351	75	222	186	276	202	244	292	190	209	164	256	275	348	385	167	150	218	264	256	202	187	232	164	218	277	232	316	204	381	294	177	238	240	439
Bacteria	Bacteria	Balneolaeota	Rhodohalobacter	224	279	293	220	190	114	151	131	281	273	246	186	69	177	155	175	177	170	208	146	120	131	111	182	198	292	184	108	191	154	169	186	160	194	209	665	840	347	623	353	1044	426	333	507	389	788
Bacteria	Bacteria	Planctomycetes	Rubripirellula	224	189	277	147	184	117	135	288	303	293	274	274	65	158	116	115	201	182	198	164	147	158	160	157	228	191	145	147	132	168	175	190	241	152	180	319	266	164	325	179	440	211	131	325	246	413
Bacteria	Bacteria	Proteobacteria	Sulfurovum	224	145	246	173	123	141	81	140	153	216	204	94	67	102	120	80	117	99	145	131	65	121	128	146	149	178	103	65	95	132	118	182	151	160	127	169	184	143	213	124	252	206	150	164	166	309
Bacteria	Bacteria	Bacteroidetes	Gillisia	223	170	246	139	147	104	88	129	268	287	238	155	104	151	180	93	127	133	129	214	140	146	116	135	207	192	166	122	178	142	94	159	98	170	155	365	569	218	395	161	459	305	134	353	289	577
Bacteria	Bacteria	Actinobacteria	Amnibacterium	222	137	347	211	204	287	278	354	114	141	124	660	98	191	223	351	235	501	322	179	214	312	271	269	304	368	163	268	124	167	358	200	347	202	205	92	124	124	120	67	123	170	190	109	84	128
Bacteria	Bacteria	Proteobacteria	Proteus	222	117	215	170	208	125	102	244	254	198	216	273	129	138	151	186	152	231	193	182	156	222	144	150	189	183	146	154	181	176	430	140	180	152	297	246	237	126	188	182	327	193	145	221	211	281
Bacteria	Bacteria	Proteobacteria	Thioflavicoccus	222	211	423	338	326	257	222	289	251	258	344	346	173	254	303	205	280	243	307	247	207	243	163	303	407	320	319	184	268	328	366	306	280	316	276	251	285	189	322	174	387	263	297	299	301	531
Bacteria	Bacteria	Proteobacteria	Thiocystis	221	295	423	297	200	173	188	202	470	281	185	270	110	263	205	135	240	188	259	167	139	108	194	288	257	307	148	137	145	179	178	149	138	158	186	259	232	191	278	170	288	269	224	268	250	489
Bacteria	Bacteria	Proteobacteria	Thiorhodococcus	221	209	358	284	227	211	237	294	220	190	226	325	160	204	237	161	229	187	315	192	174	191	228	247	287	353	172	210	191	184	217	197	249	247	246	254	306	200	246	113	274	240	150	191	180	300
Bacteria	Bacteria	Proteobacteria	Arhodomonas	220	193	383	211	182	179	154	248	342	260	264	216	102	247	229	120	244	180	294	223	167	168	168	213	303	314	187	104	273	253	153	198	181	238	265	326	403	221	318	162	330	327	171	268	286	373
Bacteria	Bacteria	Proteobacteria	Mongoliimonas	219	229	385	226	286	219	230	562	336	253	239	555	230	264	250	182	196	268	264	224	177	255	152	255	264	306	140	179	235	226	269	289	334	215	249	156	182	82	181	95	178	185	188	162	110	188
Bacteria	Bacteria	Proteobacteria	Snodgrassella	219	180	242	134	183	101	72	216	198	173	212	166	68	151	130	72	102	125	155	127	115	119	81	150	207	199	99	133	136	135	113	119	128	129	248	169	203	135	150	97	257	180	134	203	178	271
Bacteria	Bacteria	Proteobacteria	Aquicella	218	164	451	194	206	125	156	146	161	196	135	175	154	162	166	125	130	162	450	144	113	104	166	240	233	289	122	138	180	180	194	134	145	139	131	110	202	144	179	127	210	201	128	185	170	316
Bacteria	Bacteria	Proteobacteria	Gilvimarinus	218	186	311	184	187	100	136	221	525	396	788	181	113	303	172	86	110	132	202	218	200	179	149	177	227	241	247	132	229	253	431	332	147	219	261	484	354	347	502	360	520	255	286	311	523	945
Bacteria	Bacteria	Bacteroidetes	Mangrovimonas	218	198	324	152	156	99	65	178	650	571	589	106	59	146	136	55	122	119	184	224	117	206	86	116	173	243	151	127	116	164	85	179	128	89	229	336	330	140	227	119	341	226	96	186	158	332
Bacteria	Bacteria	Proteobacteria	Thalassolituus	218	302	354	195	234	141	135	196	260	280	578	226	159	222	139	147	107	146	129	188	112	114	169	162	170	221	152	138	186	182	503	243	131	233	253	381	417	315	418	376	589	304	293	382	525	1087
Bacteria	Bacteria	Proteobacteria	Albidovulum	217	191	334	282	264	154	164	319	159	174	265	384	100	162	192	223	190	283	244	146	184	167	188	242	256	245	179	142	178	201	235	224	234	231	175	296	298	262	330	169	372	354	235	390	253	372
Bacteria	Bacteria	Firmicutes	Caloranaerobacter	217	283	405	426	282	323	296	254	215	263	312	371	94	268	251	315	273	426	446	268	220	291	300	338	375	443	254	330	224	264	334	324	297	392	351	510	690	514	550	424	798	582	268	609	552	748
Bacteria	Bacteria	Aquificae	Desulfurobacterium	217	102	187	223	112	137	154	121	57	67	157	235	40	131	145	145	182	231	545	158	105	96	138	140	188	199	236	134	127	136	125	197	92	105	119	312	283	213	294	205	344	236	133	232	233	400
Bacteria	Bacteria	Proteobacteria	Desulforegula	216	242	287	233	182	130	154	174	226	219	231	188	50	269	163	99	194	158	196	163	140	187	99	185	232	314	204	99	197	193	166	225	208	195	260	352	524	277	405	177	599	303	211	375	320	461
Bacteria	Bacteria	Chlorobi	Pelodictyon	216	261	325	244	292	185	212	176	178	210	190	256	70	271	261	253	223	308	350	197	157	147	204	206	306	429	249	181	226	209	249	208	206	236	302	411	481	409	378	201	493	424	275	431	371	566
Bacteria	Bacteria	Proteobacteria	Psychrobacter	216	241	332	270	176	230	169	295	437	431	302	333	112	320	210	149	172	228	263	267	2429	193	231	253	288	338	198	164	282	322	393	338	267	319	224	455	388	263	432	243	503	403	403	355	329	484
Bacteria	Bacteria	Firmicutes	Butyricicoccus	215	132	241	180	259	125	110	127	203	257	186	282	70	166	140	153	104	236	188	222	282	231	172	194	206	266	117	116	232	227	221	257	185	220	332	331	469	215	355	228	407	258	224	289	211	494
Bacteria	Bacteria	Bacteroidetes	Odoribacter	215	158	207	142	179	99	41	121	567	327	298	158	153	149	112	86	101	160	90	183	129	114	130	127	175	171	170	145	101	183	84	152	144	149	237	290	271	108	298	138	363	252	1448	255	248	431
Bacteria	Bacteria	Firmicutes	Caldibacillus	214	156	258	239	250	178	166	163	139	169	177	288	60	198	233	238	170	324	232	140	155	183	216	144	249	273	134	229	164	141	183	242	169	168	186	373	521	299	356	214	460	416	181	389	302	437
Bacteria	Bacteria	Proteobacteria	Falsochrobactrum	214	133	304	134	162	149	121	271	277	283	406	233	149	159	152	99	170	198	179	209	183	276	165	109	197	158	158	97	169	273	142	211	292	183	213	134	98	87	153	135	176	188	187	97	104	215
Bacteria	Bacteria	Proteobacteria	Gilliamella	214	149	360	219	212	109	109	241	269	275	277	213	98	135	146	105	156	161	177	120	97	67	169	144	212	232	79	165	97	121	236	123	136	116	109	177	177	86	149	144	217	170	193	151	186	311
Bacteria	Bacteria	Proteobacteria	Kosakonia	214	200	240	256	174	240	148	201	223	160	243	208	154	188	230	189	257	394	255	144	188	121	180	221	236	307	200	126	375	181	1276	241	173	219	148	201	236	251	338	242	408	272	580	269	271	387
Bacteria	Bacteria	Proteobacteria	Helicobacter	213	229	350	233	236	196	179	357	351	439	403	238	191	214	214	126	155	240	338	254	216	242	242	169	297	295	172	160	216	247	194	180	284	215	257	297	436	329	343	278	463	305	226	390	402	546
Bacteria	Bacteria	Bacteroidetes	Lacinutrix	213	191	231	174	237	182	132	132	327	293	170	141	80	160	174	140	187	166	257	183	130	126	184	151	273	431	181	121	176	164	227	177	144	188	167	362	565	153	369	150	478	302	182	287	249	481
Bacteria	Bacteria	Bacteroidetes	Dokdonia	212	219	274	217	196	117	158	150	643	390	409	187	64	165	172	139	169	199	171	157	126	116	170	180	248	307	169	115	160	167	179	209	138	186	293	384	532	240	452	158	466	343	201	338	299	576
Bacteria	Bacteria	Actinobacteria	Salinibacterium	212	152	275	165	197	393	234	290	80	127	140	503	112	207	185	328	207	446	332	174	247	666	250	219	276	277	151	283	183	194	381	187	344	216	260	99	106	117	139	74	175	164	190	144	119	185
Bacteria	Bacteria	Proteobacteria	Zhengella	212	324	274	190	132	124	119	227	193	192	244	164	43	310	138	110	119	165	145	155	169	239	129	117	174	158	139	186	179	158	189	249	238	175	305	261	301	150	247	113	331	328	237	249	203	338
Bacteria	Bacteria	Proteobacteria	Puniceibacterium	211	216	332	196	160	152	156	330	248	221	181	308	67	348	186	101	133	171	177	199	210	281	213	204	217	214	131	175	194	241	140	341	329	265	313	166	189	148	268	95	239	239	177	203	202	223
Bacteria	Bacteria	Proteobacteria	Sulfurospirillum	211	115	220	125	190	158	110	197	152	180	122	190	90	91	112	93	98	164	187	105	54	113	137	171	209	187	77	115	93	139	197	103	114	111	77	219	228	187	193	172	246	213	264	182	187	249
Bacteria	Bacteria	Proteobacteria	Zobellella	211	240	349	236	199	127	161	245	531	319	328	284	109	220	216	179	192	256	219	172	180	134	137	143	250	372	145	144	127	223	170	177	179	202	211	523	509	203	418	223	495	333	197	302	318	568
Bacteria	Bacteria	Proteobacteria	Zooshikella	211	201	259	197	233	149	192	258	265	150	223	266	193	211	224	244	174	270	258	163	140	107	173	237	216	284	142	185	140	164	212	183	211	200	291	248	297	207	333	180	358	226	153	289	308	501
Bacteria	Bacteria	Bacteroidetes	Flexibacter	210	158	214	146	179	89	68	144	634	451	506	153	91	128	92	53	106	113	142	158	107	122	99	96	179	168	97	116	118	139	84	124	104	108	217	252	277	97	213	205	309	289	188	176	248	477
Bacteria	Bacteria	Proteobacteria	Moraxella	210	129	234	203	227	174	180	222	247	271	261	229	130	139	142	164	156	168	230	239	195	208	183	173	211	292	153	124	275	239	293	187	194	178	219	299	237	133	396	174	333	246	229	232	322	838
Bacteria	Bacteria	Proteobacteria	Neptuniibacter	207	317	345	114	119	77	80	121	337	319	470	116	58	281	138	79	91	137	118	123	110	109	98	127	176	188	86	145	77	155	281	189	147	181	246	201	294	175	239	203	271	183	87	262	280	608
Bacteria	Bacteria	Spirochaetes	Alkalispirochaeta	206	213	356	421	352	236	375	203	198	190	213	434	134	226	292	306	184	338	221	178	135	144	245	353	364	387	162	292	148	248	219	199	113	292	202	403	468	269	383	190	502	330	220	395	317	465
Bacteria	Bacteria	Cyanobacteria	Halomicronema	206	298	371	265	290	290	311	220	140	149	112	403	99	183	306	267	325	379	322	148	171	187	294	261	354	514	217	240	239	179	267	213	221	226	274	293	304	200	217	143	317	299	191	256	237	277
Bacteria	Bacteria	Firmicutes	Pelotomaculum	206	179	288	277	259	269	279	217	84	159	138	385	74	176	221	338	233	372	299	195	201	167	252	272	292	348	222	194	178	216	303	210	193	254	178	275	284	186	251	147	276	236	397	294	227	275
Bacteria	Bacteria	Spirochaetes	Leptonema	205	105	198	138	166	110	129	219	153	145	134	260	58	134	116	147	127	176	130	109	80	133	191	196	210	271	109	82	125	131	165	137	140	109	146	167	178	166	199	188	296	260	220	232	174	292
Bacteria	Bacteria	Firmicutes	Pseudobacteroides	205	183	195	148	138	167	158	176	107	111	80	166	51	130	129	123	156	204	230	205	138	187	131	180	258	228	176	119	250	138	237	199	156	144	184	112	240	158	117	63	296	206	173	194	147	316
Bacteria	Bacteria	Proteobacteria	Haemophilus	204	209	239	220	199	169	118	225	347	209	321	231	153	153	163	138	210	198	215	174	170	185	149	182	228	290	214	149	272	231	197	168	165	173	230	301	280	179	284	190	395	288	321	348	282	703
Bacteria	Bacteria	Proteobacteria	Rhodovibrio	204	194	305	223	210	163	206	260	216	228	210	389	116	219	208	223	196	275	196	140	143	157	141	220	266	221	117	136	197	177	236	163	224	201	112	142	128	125	168	111	219	309	432	203	233	297
Bacteria	Bacteria	Proteobacteria	Methylogaea	203	191	210	175	164	86	84	124	115	145	94	147	34	138	125	55	108	107	134	88	89	80	95	110	203	216	110	98	110	111	105	102	76	131	140	300	337	155	282	165	387	269	167	275	256	413
Bacteria	Bacteria	Cyanobacteria	Planktothricoides	203	217	271	222	231	168	216	229	215	239	170	324	89	224	212	158	230	265	278	181	152	215	174	177	217	272	189	163	162	186	219	165	204	154	190	314	366	265	371	203	526	314	499	382	318	552
Bacteria	Bacteria	Firmicutes	Thermobacillus	203	187	287	216	226	162	163	168	169	200	92	339	46	136	189	251	246	276	354	169	176	175	169	183	234	345	218	182	149	184	302	154	291	163	189	260	322	242	380	155	430	299	262	201	218	258
Bacteria	Bacteria	Proteobacteria	Raoultella	201	200	317	161	212	172	139	204	194	262	170	361	129	191	160	194	125	280	189	160	166	208	201	186	200	205	136	165	159	179	724	122	276	182	167	147	220	108	157	90	207	137	201	98	147	159
Archaea	Bacteria	Thaumarchaeota	Candidatus Nitrosocosmicus	201	631	546	707	310	1153	1142	1142	80	93	158	1991	449	607	341	722	847	1434	1228	472	1681	708	615	605	711	1160	444	838	1052	725	575	3416	1819	577	1255	4402	7732	1244	2254	982	2693	3359	511	1641	825	1680
Bacteria	Bacteria	Firmicutes	Acidaminococcus	200	150	289	181	283	174	180	143	221	192	181	323	28	143	211	235	184	331	222	188	164	143	145	265	214	330	168	211	179	153	215	183	164	177	254	346	350	358	365	218	525	297	219	344	340	504
Bacteria	Bacteria	Proteobacteria	Terasakiella	200	201	357	212	273	139	176	314	244	202	173	380	155	209	204	198	140	215	224	174	151	183	201	209	207	206	131	176	284	218	434	199	241	194	166	237	295	198	268	154	279	428	290	283	240	406
Bacteria	Bacteria	Cyanobacteria	Limnothrix	198	226	267	208	188	207	209	223	214	206	185	277	112	164	177	150	200	191	216	173	135	125	185	216	283	326	171	202	133	147	211	172	191	200	205	247	251	201	286	153	341	275	183	255	185	313
Bacteria	Bacteria	Cyanobacteria	Roseofilum	198	229	185	163	209	159	199	142	145	149	160	229	25	150	164	158	165	159	253	142	135	97	150	193	266	281	109	112	94	154	203	148	157	153	150	235	274	212	214	175	305	182	208	243	225	427
Bacteria	Bacteria	Proteobacteria	Aliivibrio	197	173	401	275	227	146	158	183	195	170	178	195	102	160	182	103	253	172	284	152	79	147	160	194	228	414	177	109	127	157	208	108	113	159	138	202	311	148	279	146	251	216	239	223	212	382
Bacteria	Bacteria	Proteobacteria	Yangia	197	215	322	214	269	174	204	346	238	229	262	355	97	283	159	139	145	195	192	212	190	297	153	243	228	268	173	197	215	242	290	257	278	238	306	202	331	214	352	152	385	379	280	303	226	413
Bacteria	Bacteria	Actinobacteria	Olsenella	195	97	158	159	110	136	164	165	112	140	160	287	57	157	133	170	131	259	204	174	142	151	153	134	238	177	141	187	87	175	150	168	137	180	252	264	364	178	232	165	347	204	187	319	245	365
Bacteria	Bacteria	Bacteroidetes	Rudanella	195	121	214	131	125	98	68	166	210	171	161	127	48	150	86	57	108	136	165	120	99	101	95	110	157	147	110	96	92	115	82	121	98	93	146	186	216	197	247	141	260	153	175	155	217	352
Bacteria	Bacteria	Actinobacteria	Trueperella	195	191	254	150	182	173	194	333	123	140	161	457	78	204	200	214	203	348	266	182	160	248	158	234	223	262	144	224	171	188	243	146	271	170	225	117	154	312	187	141	185	234	144	191	120	147
Bacteria	Bacteria	Proteobacteria	Macromonas	193	205	185	139	100	148	114	170	399	309	181	189	69	208	114	132	151	219	176	115	123	207	86	125	145	166	90	144	67	72	119	138	163	112	189	164	201	131	189	132	262	276	200	137	149	283
Bacteria	Bacteria	Actinobacteria	Acidipropionibacterium	192	82	232	141	143	160	140	279	126	162	160	395	76	158	153	113	178	248	219	264	339	417	174	143	165	222	231	223	148	174	208	143	233	187	240	121	122	101	138	57	115	145	133	121	103	163
Bacteria	Bacteria	Bacteroidetes	Belliella	192	206	188	89	216	124	101	184	932	614	680	172	128	101	191	119	136	157	130	178	99	95	108	127	244	190	125	111	142	113	111	123	92	180	202	355	422	79	349	155	343	185	123	230	214	515
Bacteria	Bacteria	Chlamydiae	Candidatus Rubidus	192	207	317	351	172	366	270	215	163	167	154	307	106	96	248	230	300	272	482	126	123	130	225	321	347	636	157	196	289	186	403	144	197	182	113	58	81	118	137	102	136	227	188	103	124	307
Bacteria	Bacteria	Proteobacteria	Thiorhodovibrio	192	192	296	246	197	168	172	405	301	260	157	258	92	229	221	101	171	138	189	197	172	242	142	183	215	234	183	121	165	230	295	188	209	206	229	278	292	184	281	127	281	223	153	220	228	346
Bacteria	Bacteria	Proteobacteria	Aestuariibacter	191	201	324	203	206	148	208	262	343	217	220	318	87	221	180	185	183	223	243	146	137	187	186	247	261	297	127	136	91	145	117	200	167	125	226	206	354	154	332	156	332	229	170	249	242	345
Bacteria	Bacteria	Cyanobacteria	Anabaenopsis	191	224	280	175	185	147	163	198	121	145	150	231	84	179	117	105	167	183	226	110	104	144	147	168	265	325	161	236	180	207	224	182	213	142	202	234	223	159	198	149	244	267	176	211	171	211
Bacteria	Bacteria	Chloroflexi	Brevefilum	191	194	275	345	225	236	235	219	211	317	149	315	28	202	247	431	194	315	421	219	177	171	297	271	313	372	177	225	165	172	249	239	155	309	219	465	637	218	395	228	582	365	274	488	329	782
Bacteria	Bacteria	Proteobacteria	Neptunomonas	191	293	357	178	200	110	131	196	294	317	623	203	64	271	150	103	142	140	145	187	111	177	120	180	195	260	151	140	166	175	325	229	179	230	255	551	487	230	424	251	477	287	239	359	400	707
Bacteria	Bacteria	Cyanobacteria	Spirulina	191	203	241	216	205	308	215	154	119	143	149	297	45	130	163	264	166	317	291	104	87	108	146	189	180	222	109	161	97	123	177	151	67	96	155	168	372	182	262	133	312	220	112	224	189	316
Bacteria	Bacteria	Bacteroidetes	Anaerophaga	190	178	190	109	142	59	69	130	392	362	195	135	73	126	113	69	141	85	108	131	93	69	83	136	164	150	81	100	76	128	51	156	71	96	201	256	310	155	244	127	333	210	167	230	222	377
Bacteria	Bacteria	Thermotogae	Mesotoga	190	213	256	246	280	233	236	311	147	221	179	347	73	204	206	254	204	368	351	207	167	164	227	248	311	468	198	244	293	272	434	285	363	355	230	352	570	321	460	273	586	325	214	432	323	574
Bacteria	Bacteria	Cyanobacteria	Neosynechococcus	190	196	320	271	249	193	214	226	93	121	95	199	45	210	207	234	255	204	280	200	147	187	255	285	334	378	283	182	169	207	237	188	194	228	186	150	229	196	204	132	218	253	277	203	200	264
Bacteria	Bacteria	Proteobacteria	Azovibrio	189	220	330	160	155	99	107	128	215	223	186	106	221	233	175	103	129	130	133	130	76	78	112	130	185	174	110	134	74	122	97	164	154	141	210	196	299	144	252	107	320	265	184	241	219	459
Bacteria	Bacteria	Actinobacteria	Homoserinimonas	189	184	268	213	196	406	365	517	94	118	105	790	146	277	272	456	305	618	348	278	301	593	273	285	321	329	262	389	270	311	513	370	640	294	239	47	81	88	80	89	92	233	145	76	73	76
Bacteria	Bacteria	Proteobacteria	Methyloprofundus	188	224	158	133	92	102	73	98	120	179	165	121	26	201	96	71	100	86	98	151	128	134	61	90	126	229	196	72	178	190	116	269	176	155	156	327	272	232	307	138	347	258	148	190	190	343
Bacteria	Bacteria	Proteobacteria	Salinivibrio	188	180	329	224	294	141	209	192	451	415	443	352	185	191	252	165	195	293	306	220	170	209	184	255	260	314	150	201	178	236	213	160	182	197	212	301	269	261	285	208	353	242	277	304	287	404
Bacteria	Bacteria	Proteobacteria	Candidatus Puniceispirillum	187	140	349	138	93	97	171	293	133	125	154	216	85	157	99	204	127	133	195	189	146	229	114	81	128	103	81	125	307	176	339	161	240	259	142	87	183	123	164	86	116	175	116	104	99	158
Bacteria	Bacteria	Bacteroidetes	Negadavirga	186	128	191	121	112	65	67	102	155	155	200	96	34	119	72	62	94	94	65	105	72	78	89	48	133	110	163	103	96	143	88	85	75	125	181	137	222	133	134	78	201	141	108	129	140	290
Bacteria	Bacteria	Proteobacteria	Pacificimonas	186	147	303	285	403	161	197	176	282	257	220	349	209	143	291	201	181	241	211	117	112	129	209	215	215	214	105	232	286	137	258	117	145	164	109	219	251	225	327	146	300	263	275	180	234	302
Archaea	Bacteria	Euryarchaeota	Halogranum	186	192	283	224	168	209	200	150	136	127	174	299	37	145	167	182	195	229	282	172	186	118	164	219	234	292	141	158	104	129	137	143	140	180	206	206	219	240	239	148	344	266	170	228	193	240
Bacteria	Bacteria	Bacteroidetes	Crocinitomix	185	144	229	209	122	86	116	106	13694	11274	412	123	141	137	104	139	125	120	121	186	117	95	178	87	138	165	133	132	198	143	94	152	102	115	190	243	292	164	352	185	409	201	109	278	275	534
Bacteria	Bacteria	Proteobacteria	Thermomonas	185	306	931	169	145	117	99	190	498	708	426	133	194	196	140	125	120	227	212	209	144	751	137	123	159	176	143	177	196	141	293	112	163	228	170	295	256	198	297	173	227	292	268	196	265	291
Bacteria	Bacteria	Cyanobacteria	Cyanobacterium	184	201	283	154	197	120	171	186	262	275	266	205	41	145	162	145	158	180	190	131	100	114	169	154	250	233	111	106	145	134	128	191	125	173	150	246	337	229	304	122	296	262	169	213	236	417
Bacteria	Bacteria	Firmicutes	Geosporobacter	184	142	279	266	166	199	187	149	190	219	160	268	43	244	159	184	141	236	253	176	201	118	204	180	221	256	161	187	141	197	173	283	136	185	161	336	414	336	300	208	434	313	189	406	304	572
Bacteria	Bacteria	Proteobacteria	Pararhodobacter	184	225	299	227	237	135	136	333	237	208	242	295	142	216	196	107	165	237	174	172	172	211	121	173	209	216	139	182	169	236	196	203	221	167	203	292	295	241	528	306	402	293	236	314	287	515
Bacteria	Bacteria	Bacteroidetes	Pseudopedobacter	184	89	275	95	133	72	39	116	1601	1549	662	80	55	75	104	48	79	73	82	53	47	42	59	51	136	135	68	52	70	56	21	70	88	73	71	136	168	102	163	80	207	95	203	141	167	385
Bacteria	Bacteria	Proteobacteria	Granulosicoccus	183	189	230	201	185	120	129	221	341	213	194	296	308	186	223	114	122	198	145	225	169	148	137	159	246	298	157	145	178	187	255	187	231	178	242	320	235	140	298	105	281	342	315	247	212	366
Bacteria	Bacteria	Cyanobacteria	Cuspidothrix	182	174	299	211	291	245	319	218	82	125	120	404	52	163	294	337	263	396	272	126	99	155	207	235	222	253	164	237	143	160	294	182	183	206	167	266	375	247	254	149	287	335	238	252	217	325
Bacteria	Bacteria	Firmicutes	Propionispora	182	174	292	325	279	205	219	213	92	142	150	301	47	162	249	270	269	315	400	219	104	122	266	297	353	415	154	209	156	227	159	149	159	255	141	230	307	247	225	184	445	278	165	228	195	332
Bacteria	Bacteria	Proteobacteria	Methylohalobius	181	237	214	147	150	143	133	176	177	167	280	155	58	240	142	96	140	140	203	178	144	112	126	150	193	384	137	91	155	165	166	218	194	156	247	273	282	252	287	206	447	329	208	347	326	453
Bacteria	Bacteria	Firmicutes	Orenia	181	159	223	199	219	193	149	126	174	225	121	243	45	167	165	252	171	282	292	123	92	102	182	198	226	279	155	221	157	138	150	142	100	189	219	309	294	253	312	165	407	238	139	283	225	539
Bacteria	Bacteria	Rhodothermaeota	Rubricoccus	181	292	263	142	197	86	111	135	194	197	180	199	94	252	166	141	128	210	327	154	72	99	129	181	193	187	105	115	123	128	119	226	111	137	255	510	648	370	484	246	553	426	260	446	345	629
Bacteria	Bacteria	Fibrobacteres	Chitinispirillum	180	135	213	174	195	102	115	218	117	145	138	191	42	168	168	135	111	137	195	107	102	129	152	142	169	230	106	116	106	142	172	183	108	131	103	206	238	164	167	109	199	188	182	166	136	228
Bacteria	Bacteria	Proteobacteria	Hirschia	179	124	222	128	106	64	99	135	2611	4259	1382	153	105	205	97	55	92	131	84	375	110	138	114	104	166	104	89	72	122	142	197	150	113	113	635	459	387	148	1346	298	502	323	232	401	440	735
Bacteria	Bacteria	Proteobacteria	Arenicella	178	229	203	156	139	143	64	123	273	202	268	118	191	192	138	61	70	143	92	137	94	108	80	84	141	162	124	95	111	129	80	181	132	205	245	292	441	316	358	235	403	253	116	300	377	501
Bacteria	Bacteria	Proteobacteria	Cucumibacter	178	138	265	128	195	131	119	284	77	100	124	190	80	123	139	125	162	194	265	147	141	167	117	164	228	210	116	104	173	133	223	162	182	182	194	84	118	112	126	73	102	103	155	143	134	139
Bacteria	Bacteria	Proteobacteria	Confluentimicrobium	176	249	377	190	225	183	144	227	180	185	210	269	98	237	178	109	195	178	170	198	167	144	149	201	195	213	145	164	181	208	173	206	182	205	224	253	238	135	201	133	229	207	134	233	195	307
Bacteria	Bacteria	Proteobacteria	Eoetvoesia	176	154	248	194	195	109	115	212	142	143	119	255	149	206	241	101	270	171	239	156	94	273	189	143	198	184	150	142	325	174	418	187	213	142	140	155	229	144	233	113	289	262	307	213	208	311
Bacteria	Bacteria	Proteobacteria	Morganella	176	210	266	135	234	121	105	151	432	301	241	188	68	178	140	124	123	173	229	185	128	133	173	173	207	234	138	121	119	151	178	179	177	162	271	354	442	336	406	222	704	396	407	289	388	542
Bacteria	Bacteria	Firmicutes	Calderihabitans	175	141	265	311	312	287	259	219	149	203	149	356	70	149	189	347	257	350	370	94	137	161	296	234	284	443	133	272	142	137	243	147	175	184	144	187	263	230	225	136	276	261	183	234	192	296
Bacteria	Bacteria	Proteobacteria	Halorhodospira	175	204	309	178	192	149	130	230	410	350	211	239	138	272	183	102	168	143	286	279	186	193	155	224	233	220	156	112	207	216	167	139	184	200	213	272	242	143	218	129	283	181	207	241	159	280
Bacteria	Bacteria	Bacteroidetes	Psychroflexus	175	136	172	125	121	106	82	129	190	155	137	169	73	118	138	62	106	98	157	106	95	104	107	120	126	162	83	97	80	82	50	125	93	111	200	159	192	122	182	101	223	135	87	133	161	299
Bacteria	Bacteria	Spirochaetes	Turneriella	175	63	206	90	194	61	66	134	544	359	460	88	55	70	121	44	104	91	118	67	45	44	95	143	154	166	110	86	135	92	54	70	48	65	97	144	191	114	202	122	290	143	128	203	193	294
Bacteria	Bacteria	Firmicutes	Christensenella	172	71	117	91	100	89	108	215	81	118	72	181	61	109	97	83	91	104	95	98	53	108	94	82	141	145	68	107	90	131	120	137	157	111	113	97	100	124	142	76	178	115	82	93	100	184
Bacteria	Bacteria	Proteobacteria	Desulfamplus	172	247	216	200	240	139	143	272	317	508	299	264	81	280	165	143	164	203	201	184	163	149	143	162	255	234	176	161	243	247	146	242	217	178	331	468	569	264	424	229	598	453	646	363	431	646
Bacteria	Bacteria	Actinobacteria	Gulosibacter	172	160	231	198	148	163	133	456	71	84	48	354	88	206	172	213	221	282	271	169	177	390	157	157	240	162	120	142	126	135	150	202	335	141	158	30	46	50	47	46	40	101	131	52	41	44
Bacteria	Bacteria	Proteobacteria	Roseisalinus	172	147	280	146	197	116	176	280	45	74	64	281	68	170	194	117	107	171	144	159	172	183	122	134	192	158	75	157	136	160	180	150	220	119	137	64	82	51	99	69	107	125	257	115	105	97
Bacteria	Bacteria	Actinobacteria	Xiangella	172	84	247	127	196	100	111	171	96	143	69	195	23	77	123	158	154	248	193	79	90	123	164	124	185	231	80	147	84	78	167	79	187	127	125	38	100	86	77	40	62	153	146	75	100	75
Bacteria	Bacteria	Proteobacteria	Caedimonas	171	75	194	169	140	65	76	202	92	179	158	171	57	120	91	37	77	133	93	87	147	111	209	80	81	120	47	88	105	173	162	118	216	117	144	58	110	83	149	114	155	127	87	71	61	99
Bacteria	Bacteria	Cyanobacteria	Euhalothece	171	150	240	111	133	146	133	200	82	96	80	187	67	147	147	125	137	146	164	101	125	138	107	113	179	197	124	143	85	165	201	146	103	109	104	227	266	149	260	102	287	197	160	219	184	245
Bacteria	Bacteria	Proteobacteria	Hydrogenovibrio	171	152	212	159	154	119	91	110	275	232	393	185	144	156	165	107	138	140	147	114	88	73	103	135	167	198	79	129	167	154	114	147	115	106	164	153	181	125	215	144	234	202	127	180	168	243
Bacteria	Bacteria	Firmicutes	Dorea	170	156	204	109	146	124	106	181	153	150	175	238	58	116	157	143	153	223	199	177	123	164	96	117	168	206	138	162	104	238	164	187	198	179	238	256	320	238	277	141	353	253	462	289	216	348
Archaea	Bacteria	Thaumarchaeota	Nitrosoarchaeum	170	687	677	711	282	751	922	186	33	70	60	356	245	310	183	620	1117	1780	1492	1010	2220	1274	576	502	631	2158	1020	150	2486	474	1362	585	764	408	150	395	847	745	576	395	699	637	128	366	446	679
Bacteria	Bacteria	Proteobacteria	Catenovulum	169	133	219	151	160	123	123	167	431	341	307	176	66	153	140	184	160	193	185	170	97	96	138	164	194	194	67	116	120	117	136	130	86	105	136	329	342	178	405	210	411	248	194	366	330	750
Bacteria	Bacteria	Actinobacteria	Crossiella	169	130	264	202	140	256	289	229	81	85	92	444	59	140	175	262	230	392	261	193	282	404	251	157	238	328	227	185	221	175	422	200	312	206	180	170	139	154	116	77	119	175	102	109	106	133
Bacteria	Bacteria	Proteobacteria	Diaphorobacter	168	210	356	153	179	117	118	193	392	409	245	215	101	222	162	114	98	164	142	146	107	95	106	159	171	214	95	149	159	121	203	164	98	151	276	293	326	176	330	177	344	188	213	248	277	412
Bacteria	Bacteria	Proteobacteria	Candidatus Methylopumilus	166	235	210	133	133	56	30	107	249	297	153	117	88	213	119	45	65	92	136	133	72	73	108	128	111	174	86	71	306	151	107	161	91	152	193	208	240	276	325	517	430	266	778	363	479	496
Bacteria	Bacteria	Proteobacteria	Chromohalobacter	166	201	351	336	318	166	209	280	270	316	345	399	268	237	300	165	240	256	304	205	136	190	177	184	244	255	182	210	417	259	237	192	226	233	273	219	258	172	299	116	336	266	253	217	251	329
Bacteria	Bacteria	Aquificae	Sulfurihydrogenibium	166	136	161	129	210	119	81	149	130	238	86	139	24	149	112	64	122	126	230	105	136	81	67	139	171	154	157	81	95	122	98	151	103	59	165	198	257	187	246	120	292	238	78	191	187	273
Bacteria	Bacteria	Actinobacteria	Austwickia	165	102	141	88	94	84	73	189	79	68	62	154	42	147	130	106	119	206	131	104	103	125	91	90	160	129	76	191	66	133	104	105	188	132	192	96	121	80	85	82	98	87	81	93	59	75
Bacteria	Bacteria	Proteobacteria	Citreicella	165	143	245	230	220	130	133	196	394	283	191	300	113	184	136	144	143	182	153	188	163	206	153	143	225	195	126	127	150	182	173	199	281	185	166	249	297	164	210	180	260	235	377	249	188	269
Bacteria	Bacteria	Firmicutes	Heliobacterium	165	165	190	165	157	166	152	134	83	142	258	174	60	99	120	124	211	224	200	200	138	210	163	157	234	323	151	95	155	115	88	173	253	174	132	227	241	170	253	137	252	193	219	275	194	407
Bacteria	Bacteria	Proteobacteria	Maritalea	165	115	324	121	155	87	157	291	190	270	164	370	59	172	140	142	130	167	126	134	135	207	135	128	218	156	156	164	135	162	148	191	249	108	187	108	148	129	146	117	231	181	191	165	149	206
Bacteria	Bacteria	Bacteroidetes	Ulvibacter	165	126	150	78	74	47	31	100	207	202	193	82	16	113	82	23	63	33	69	119	55	56	67	56	110	103	93	51	97	98	83	118	66	101	253	215	244	96	192	119	312	123	87	179	179	403
Bacteria	Bacteria	Proteobacteria	Desulfocapsa	163	218	234	159	149	112	97	159	153	217	390	106	145	172	153	83	97	146	161	172	105	116	146	116	183	215	127	101	128	136	93	148	145	100	194	278	394	185	386	148	372	213	178	318	267	396
Bacteria	Bacteria	Cyanobacteria	Nodosilinea	163	312	329	265	181	337	261	227	149	97	187	276	42	236	185	231	234	348	304	206	174	188	189	264	257	360	171	219	161	240	245	281	256	184	285	535	439	284	388	180	455	382	167	362	258	421
Bacteria	Bacteria	Firmicutes	Domibacillus	162	182	233	188	170	236	181	221	163	203	156	332	76	160	133	207	126	274	226	144	138	212	164	210	227	268	170	260	96	144	194	155	160	232	221	370	300	277	298	123	388	323	140	295	208	395
Bacteria	Bacteria	Proteobacteria	Pluralibacter	162	141	258	149	200	214	179	288	150	120	153	276	124	223	165	148	139	237	178	133	124	178	215	243	250	255	172	161	149	157	372	146	203	136	180	157	204	166	215	128	198	145	170	174	171	231
Bacteria	Bacteria	Proteobacteria	Boseongicola	161	148	176	113	92	98	103	283	102	108	147	185	54	176	91	52	67	85	101	153	153	139	86	80	63	99	74	96	113	162	142	201	207	102	194	148	142	83	156	75	192	155	55	122	118	157
Bacteria	Bacteria	Proteobacteria	Euryhalocaulis	161	237	254	178	147	69	104	157	827	434	271	148	100	203	168	61	102	103	147	195	109	138	101	163	183	250	152	81	185	180	130	165	185	172	185	196	296	146	306	120	329	253	175	226	223	289
Bacteria	Bacteria	Proteobacteria	Mangrovicella	161	192	318	217	183	176	187	400	394	338	284	324	165	220	222	128	150	220	158	195	196	231	185	175	200	192	128	150	187	251	196	263	308	216	183	240	200	163	356	172	364	382	206	237	229	421
Bacteria	Bacteria	Proteobacteria	Kushneria	160	184	368	299	179	209	202	205	357	294	389	333	152	215	224	201	167	272	256	161	135	121	139	250	274	262	126	176	229	202	315	178	184	223	260	361	353	264	424	239	452	235	206	295	372	548
Bacteria	Bacteria	Proteobacteria	Cedecea	159	137	255	210	234	131	200	243	222	206	183	329	195	136	247	202	199	381	201	162	142	211	147	221	232	307	107	195	168	197	529	147	201	176	131	212	206	105	290	119	226	213	196	166	127	258
Bacteria	Bacteria	Actinobacteria	Glaciibacter	159	204	202	224	170	340	241	296	87	112	111	499	67	154	219	361	219	450	319	155	122	228	217	257	236	358	157	308	107	198	307	173	272	177	166	108	118	105	146	77	100	247	211	145	74	128
Bacteria	Bacteria	Firmicutes	Lihuaxuella	159	123	129	221	165	178	213	136	67	104	85	342	85	117	140	287	205	329	294	117	130	120	205	179	204	217	126	174	122	146	240	153	129	160	125	301	332	112	333	146	421	236	217	250	234	402
Bacteria	Bacteria	Proteobacteria	Salinarimonas	159	285	293	176	173	136	142	362	175	241	190	304	97	228	126	110	124	153	174	191	147	186	140	158	172	194	167	155	190	266	172	253	270	198	256	151	124	101	134	139	186	214	118	157	136	154
Bacteria	Bacteria	Bacteroidetes	Solirubrum	159	138	144	100	101	60	49	96	145	76	84	89	47	125	68	65	69	63	91	142	69	75	57	91	120	140	98	73	63	90	62	104	61	118	141	194	273	199	191	120	275	173	92	150	163	293
Bacteria	Bacteria	Proteobacteria	Limnobacter	158	161	256	268	179	187	183	193	174	204	170	207	109	175	178	137	138	156	190	143	159	114	182	200	236	279	89	136	150	190	236	147	127	245	119	283	272	142	224	96	284	254	171	208	185	242
Bacteria	Bacteria	Proteobacteria	Providencia	158	166	309	185	245	226	203	218	343	334	198	304	161	180	205	157	193	288	159	215	207	174	202	181	259	212	191	161	212	170	289	152	198	201	164	228	206	165	346	159	303	276	217	207	211	312
Bacteria	Bacteria	Proteobacteria	Oligella	157	108	145	134	126	110	86	117	187	126	134	198	215	84	144	106	81	111	172	71	45	168	128	128	160	169	85	106	88	131	158	79	99	114	100	133	189	140	199	79	206	140	99	106	123	225
Bacteria	Bacteria	Bacteroidetes	Labilibacter	156	193	160	132	87	68	32	77	363	365	272	77	21	122	77	60	76	66	104	123	88	102	89	75	122	148	104	63	99	99	50	130	89	121	267	126	189	113	198	101	249	146	94	147	166	355
Bacteria	Bacteria	Firmicutes	Subdoligranulum	156	115	127	123	100	46	71	84	202	186	134	79	21	81	60	95	66	103	73	122	99	138	71	88	148	106	55	70	68	152	87	146	117	78	130	160	137	96	108	74	119	92	119	166	105	136
Bacteria	Bacteria	Proteobacteria	Vitreoscilla	156	142	197	113	164	96	69	218	169	248	114	202	182	153	241	73	381	120	126	95	91	72	108	113	113	119	120	78	241	141	128	155	137	64	164	143	120	89	206	74	172	157	390	149	204	202
Bacteria	Bacteria	Proteobacteria	Oxalobacter	155	226	239	192	126	102	121	130	239	168	212	144	68	152	147	177	106	117	178	118	126	79	132	147	213	760	88	133	146	177	131	301	139	211	661	161	270	202	221	92	248	237	170	218	215	326
Bacteria	Bacteria	Proteobacteria	Desulfospira	154	219	273	181	167	130	119	176	129	172	204	216	46	192	123	82	118	127	133	114	101	143	133	150	183	230	141	133	167	168	131	140	140	185	206	474	523	267	363	213	536	279	153	314	255	576
Bacteria	Bacteria	Bacteroidetes	Ekhidna	154	82	189	135	209	113	76	145	785	595	751	86	25	63	92	89	79	91	81	129	58	40	93	97	131	160	61	118	78	122	158	114	64	109	146	405	396	132	390	108	395	198	122	220	223	555
Bacteria	Bacteria	Proteobacteria	Geopsychrobacter	154	119	143	110	86	66	96	181	117	102	121	168	33	154	80	67	93	88	82	80	62	55	103	105	131	160	115	65	87	103	98	125	110	128	92	169	179	150	242	123	257	279	284	148	182	296
Bacteria	Bacteria	Bacteroidetes	Pseudozobellia	154	142	210	160	170	105	120	111	137	158	153	141	38	93	138	118	144	188	160	79	79	84	95	144	160	218	75	105	75	95	49	134	99	107	117	149	170	111	154	86	197	166	98	170	119	200
Bacteria	Bacteria	Bacteroidetes	Butyricimonas	153	131	157	100	168	79	94	101	359	422	274	148	179	105	110	92	86	98	97	95	88	99	119	94	126	121	78	75	133	119	92	149	113	119	140	311	377	181	331	187	364	255	456	234	262	455
Bacteria	Bacteria	Proteobacteria	Rhodobium	153	154	238	226	121	132	127	276	178	163	103	232	87	193	140	118	128	121	152	142	148	157	126	116	171	206	117	127	184	221	351	192	226	172	153	161	223	109	170	102	190	151	123	191	135	155
Bacteria	Bacteria	Proteobacteria	Alkalispirillum	152	254	333	277	256	151	207	227	224	253	217	327	153	174	251	150	214	289	281	131	142	127	177	240	265	295	126	174	232	203	185	139	161	298	185	231	207	169	247	132	281	272	192	173	197	302
Bacteria	Bacteria	Proteobacteria	Amphritea	151	140	224	152	131	90	89	129	268	208	287	140	48	131	119	54	130	94	145	97	120	96	110	122	178	151	83	55	123	144	160	111	101	132	93	284	381	220	400	223	523	236	126	396	331	485
Bacteria	Bacteria	Firmicutes	Desulfocucumis	151	141	188	200	210	198	213	167	104	151	462	357	24	119	164	223	197	273	268	162	124	129	214	209	212	236	118	189	141	158	223	139	179	163	166	279	284	196	262	203	380	253	289	365	290	523
Bacteria	Bacteria	Proteobacteria	Desulfonatronospira	151	119	164	92	83	82	61	198	93	96	107	124	38	79	93	60	96	36	107	91	65	106	79	120	137	136	134	60	120	82	187	116	127	100	108	140	148	100	150	66	199	119	77	106	118	166
Bacteria	Bacteria	Proteobacteria	Wolbachia	151	143	217	185	197	158	173	255	237	140	166	345	211	80	151	119	179	337	143	166	2959	151	124	139	191	282	111	197	156	135	211	115	173	124	220	85	101	79	127	102	149	195	208	104	137	198
Bacteria	Bacteria	Proteobacteria	Thalassobius	150	129	164	164	165	107	110	220	160	117	73	183	63	150	115	87	148	112	142	106	79	154	97	113	142	170	138	129	86	137	157	122	151	107	111	97	120	94	140	95	126	143	116	113	128	145
Bacteria	Bacteria	Proteobacteria	Ferrimonas	149	157	217	176	165	129	129	175	405	302	307	163	74	206	184	117	130	164	232	162	200	89	145	130	191	254	135	100	119	168	154	260	125	181	215	339	378	186	406	201	509	235	199	406	309	547
Bacteria	Bacteria	Cyanobacteria	Rivularia	149	114	172	122	131	142	174	158	40	87	86	254	39	127	142	144	155	189	231	99	78	129	238	171	214	237	135	130	141	138	197	117	155	150	131	133	244	183	262	146	305	227	164	277	151	424
Bacteria	Bacteria	Proteobacteria	Tatlockia	149	162	213	106	179	82	119	127	258	507	189	360	109	89	100	80	153	224	204	273	236	190	172	120	157	107	161	221	457	259	391	90	179	169	135	109	163	278	385	258	262	166	152	362	242	587
Bacteria	Bacteria	Cyanobacteria	Gloeocapsopsis	148	133	189	185	206	160	168	137	102	136	94	252	53	160	148	171	116	238	185	97	91	118	178	143	151	223	91	140	118	140	196	131	173	140	145	242	249	134	249	133	296	236	168	243	179	319
Bacteria	Bacteria	Proteobacteria	Maribius	148	194	273	212	205	161	161	296	175	195	113	340	69	190	179	143	138	210	177	202	151	279	130	163	206	186	148	170	149	202	143	185	293	177	163	141	114	147	177	82	164	189	141	148	131	216
Bacteria	Bacteria	Bacteroidetes	Petrimonas	148	181	251	153	169	94	104	104	300	282	286	132	29	149	107	91	116	112	100	106	76	64	100	103	133	124	103	101	99	96	85	158	68	85	186	240	305	135	279	144	305	255	148	217	205	363
Bacteria	Bacteria	Proteobacteria	Emcibacter	147	180	216	148	210	107	164	176	569	349	182	210	197	246	199	128	184	163	231	124	127	98	107	191	236	252	122	135	191	214	418	182	141	178	97	238	207	98	231	136	290	151	170	219	169	320
Bacteria	Bacteria	Proteobacteria	Tolumonas	147	128	130	99	175	60	59	147	123	126	180	147	40	130	91	65	59	110	154	108	99	74	91	98	124	144	83	59	92	107	122	97	101	127	78	123	175	117	173	88	172	194	105	111	159	206
Archaea	Bacteria	Thaumarchaeota	Candidatus Nitrosotenuis	147	585	694	850	250	715	1054	152	67	125	74	319	223	181	194	739	1125	2092	1903	968	2101	1426	518	503	702	1808	968	173	3755	326	1653	619	489	537	118	328	1203	480	6818	960	8459	4638	166	2180	4752	14659
Bacteria	Bacteria	Bacteroidetes	Arcticibacterium	146	171	177	100	149	72	45	106	367	201	243	124	61	109	105	42	70	36	115	181	72	96	87	86	131	153	95	56	116	153	87	149	149	139	231	223	204	107	213	132	252	173	113	184	192	315
Bacteria	Bacteria	Proteobacteria	Pseudochrobactrum	146	97	164	93	119	71	62	134	258	271	715	185	46	146	126	91	83	132	93	203	191	274	105	96	110	108	171	74	85	171	153	102	98	113	180	110	103	145	163	121	168	166	208	128	144	165
Bacteria	Bacteria	Firmicutes	Sporolituus	146	179	259	268	188	255	182	177	95	128	102	281	31	131	183	219	161	272	263	123	83	121	226	174	251	295	162	204	115	151	193	110	124	170	142	190	185	133	164	83	198	181	221	180	148	234
Archaea	Bacteria	Euryarchaeota	Halobiforma	146	88	153	126	106	118	111	85	40	44	26	106	18	68	81	95	70	136	170	88	50	75	157	126	171	183	90	103	69	53	115	95	73	47	94	63	112	185	111	91	144	102	50	149	73	116
Bacteria	Bacteria	Proteobacteria	Algiphilus	145	90	142	143	131	83	80	114	355	238	167	116	75	122	110	61	52	122	123	115	110	95	82	120	122	168	75	103	70	131	110	145	96	88	109	253	241	156	296	129	327	162	131	208	208	412
Bacteria	Bacteria	Chlorobi	Chloroherpeton	145	164	190	173	141	110	108	104	110	139	112	158	47	128	178	96	142	120	252	137	80	79	113	148	223	210	106	124	155	133	193	81	85	143	95	209	317	183	248	144	349	209	165	235	194	344
Bacteria	Bacteria	Proteobacteria	Grimontia	145	86	167	131	139	84	128	203	158	166	266	163	62	120	133	86	103	148	99	159	96	98	80	127	167	174	98	115	114	153	126	127	168	160	149	188	174	110	147	107	182	188	85	149	143	246
Bacteria	Bacteria	Proteobacteria	Magnetovibrio	145	186	332	246	198	225	372	631	310	305	246	683	157	344	182	156	191	253	171	273	240	322	156	214	254	252	203	170	268	485	440	428	574	329	228	289	242	213	234	156	333	363	208	243	256	350
Bacteria	Bacteria	Proteobacteria	Melaminivora	144	119	174	118	129	85	67	131	189	244	199	131	65	140	124	96	81	69	82	77	80	96	81	126	148	131	60	82	95	90	282	75	72	125	104	206	206	106	261	124	252	188	159	212	193	315
Bacteria	Bacteria	Firmicutes	Pseudoclostridium	143	210	160	151	156	113	76	170	80	81	109	154	127	142	111	123	121	183	158	151	85	120	147	128	136	271	108	132	102	108	154	125	131	180	96	214	236	156	190	124	229	186	101	259	179	334
Bacteria	Bacteria	Bacteroidetes	Salisaeta	143	144	211	143	177	103	145	193	81	92	118	193	43	147	188	137	177	149	361	142	102	93	174	205	233	292	165	155	103	125	127	133	133	129	98	235	306	173	234	103	279	212	157	214	193	355
Bacteria	Bacteria	Firmicutes	Thermodesulfobium	143	92	182	112	155	163	108	140	40	74	127	187	43	42	136	178	114	174	250	64	45	48	130	139	115	206	74	159	42	71	96	52	106	84	97	20	86	83	69	35	88	111	69	132	78	118
Bacteria	Bacteria	Firmicutes	Anaeromassilibacillus	142	78	248	97	85	36	63	103	183	133	287	84	54	87	104	73	110	113	118	104	94	98	57	58	99	98	138	69	63	126	82	56	72	81	102	206	165	129	132	96	211	143	107	150	136	206
Bacteria	Bacteria	Actinobacteria	Aurantimicrobium	142	73	141	113	97	191	199	267	47	58	97	281	64	164	171	184	135	234	216	141	144	254	139	173	161	187	117	100	165	130	470	148	211	151	142	30	103	162	113	90	165	129	72	79	74	54
Bacteria	Bacteria	Firmicutes	Planomicrobium	141	161	226	163	221	202	146	123	85	120	127	237	69	127	162	211	136	241	211	122	96	156	216	147	215	258	149	179	121	185	170	157	143	131	167	185	259	170	244	108	233	219	307	212	178	246
Bacteria	Bacteria	Proteobacteria	Saccharospirillum	141	125	240	161	136	88	80	145	258	217	233	176	67	109	138	96	103	131	127	132	103	118	112	134	180	158	113	112	94	144	141	129	134	118	120	202	274	256	226	132	232	182	108	163	157	264
Bacteria	Bacteria	Bacteroidetes	Salinimicrobium	141	189	151	105	106	66	45	92	196	260	178	119	91	123	94	69	55	104	95	119	92	86	76	64	117	120	83	68	172	139	153	94	64	113	103	150	219	173	218	137	269	214	70	232	211	320
Bacteria	Bacteria	Actinobacteria	Auraticoccus	140	96	118	123	149	185	172	189	76	117	64	821	44	106	161	456	177	554	242	62	107	165	154	190	122	133	71	293	80	90	157	96	187	162	101	57	94	90	92	67	135	102	106	89	73	148
Bacteria	Bacteria	Bacteroidetes	Jiulongibacter	140	93	125	38	70	48	17	67	204	129	129	38	20	123	43	16	53	14	45	110	63	66	32	48	99	92	77	26	64	50	50	128	74	78	200	162	203	49	132	66	199	105	60	120	110	270
Bacteria	Bacteria	Actinobacteria	Mycolicibacillus	140	78	183	117	135	192	146	235	82	110	73	299	38	114	136	170	142	227	215	165	125	180	144	141	169	166	114	164	106	94	225	155	223	146	101	61	137	65	94	82	107	150	82	129	81	63
Bacteria	Bacteria	Actinobacteria	Raineyella	140	200	212	200	155	243	245	355	95	152	115	474	89	201	189	237	234	360	272	148	165	224	175	192	218	293	212	229	176	163	277	177	266	188	174	223	157	156	157	118	175	241	136	169	119	223
Bacteria	Bacteria	Firmicutes	Tepidanaerobacter	140	110	209	184	174	281	200	175	120	147	90	249	72	95	198	254	176	331	263	110	77	83	232	213	215	318	85	205	93	108	249	97	125	113	148	279	278	255	210	142	291	234	163	242	208	258
Bacteria	Bacteria	Firmicutes	Thalassobacillus	139	128	144	156	133	191	146	100	30	65	57	228	46	86	130	186	140	242	213	89	122	79	182	154	167	188	113	114	276	111	247	137	123	187	157	87	117	183	144	98	221	165	203	166	130	169
Bacteria	Bacteria	Thermodesulfobacteria	Thermodesulfobacterium	139	110	156	134	92	113	119	129	63	95	106	128	23	109	119	114	123	198	167	143	127	136	149	82	141	234	89	103	107	99	158	144	124	114	128	258	241	197	225	148	272	221	240	219	197	356
Bacteria	Bacteria	Proteobacteria	Aquimixticola	138	158	224	177	165	125	94	150	92	93	128	186	57	190	107	88	91	135	139	112	105	121	115	146	154	165	88	81	109	124	114	171	162	94	132	74	110	107	115	90	102	154	116	118	120	150
Bacteria	Bacteria	Proteobacteria	Candidatus Glomeribacter	138	203	282	266	237	199	148	187	84	173	207	256	191	191	245	146	142	233	232	190	131	144	131	288	258	390	143	207	147	245	204	157	150	153	214	148	155	108	124	72	162	150	141	89	161	169
Bacteria	Bacteria	Proteobacteria	Ectothiorhodosinus	138	89	141	84	88	80	65	74	84	79	109	106	76	141	82	51	99	89	82	91	65	53	76	98	109	97	60	69	71	67	36	112	84	76	73	303	138	155	131	121	183	226	101	158	157	192
Bacteria	Bacteria	Bacteroidetes	Nafulsella	138	100	175	53	78	29	26	62	216	192	228	80	43	86	74	64	41	75	78	97	71	66	52	35	117	133	59	50	68	56	41	106	94	66	179	208	338	168	290	136	327	183	194	234	213	328
Bacteria	Bacteria	Proteobacteria	Aliiglaciecola	137	152	185	139	89	88	82	121	97	114	100	86	153	134	118	75	143	80	207	69	69	85	97	127	188	212	77	72	105	91	60	114	89	88	135	182	223	162	264	97	226	213	100	259	164	215
Bacteria	Bacteria	Firmicutes	Anaeroarcus	137	68	83	224	133	254	98	128	42	56	123	206	25	60	102	131	66	145	170	48	47	45	115	107	132	223	85	122	71	60	166	80	74	63	76	114	136	151	107	75	116	156	236	134	110	100
Bacteria	Bacteria	Dictyoglomi	Dictyoglomus	137	129	229	151	171	241	155	101	107	133	115	219	56	87	169	181	135	214	238	108	99	84	148	160	172	213	145	170	85	125	183	133	100	136	101	254	292	170	262	129	316	195	224	250	202	335
Bacteria	Bacteria	Proteobacteria	Kingella	137	160	211	120	123	92	60	134	246	273	232	185	115	143	109	89	48	111	179	149	140	111	92	97	134	152	76	71	105	121	129	159	120	100	172	228	239	130	168	199	312	208	162	208	185	266
Bacteria	Bacteria	Proteobacteria	Candidatus Nitrosoglobus	136	149	222	164	164	117	135	280	180	189	133	247	147	168	175	73	117	163	229	110	106	140	136	139	177	186	101	103	306	183	179	137	161	161	142	223	218	139	215	128	229	237	197	197	198	226
Bacteria	Bacteria	Proteobacteria	Malonomonas	136	170	266	128	102	92	159	133	96	122	126	119	47	162	115	63	122	97	149	94	71	71	136	131	185	200	84	72	63	112	97	161	94	108	89	179	277	236	293	143	385	327	143	251	257	402
Bacteria	Bacteria	Proteobacteria	Taylorella	136	284	210	120	66	36	54	55	148	194	208	45	6	232	61	10	47	38	129	138	63	66	79	50	97	179	74	49	22	73	22	102	104	67	173	106	193	106	131	50	185	212	107	158	129	195
Bacteria	Bacteria	Firmicutes	Thermanaeromonas	136	141	203	345	142	153	279	129	39	104	78	198	37	101	129	383	210	266	435	122	122	127	167	168	163	300	121	147	108	171	157	121	142	154	307	115	217	200	180	146	264	190	124	233	127	279
Archaea	Bacteria	Euryarchaeota	Halarchaeum	136	184	276	256	226	116	183	184	224	245	177	223	83	164	181	123	193	156	159	180	112	128	157	151	232	194	138	138	132	203	135	159	157	179	161	117	224	192	228	99	213	264	172	215	187	243
Bacteria	Bacteria	Bacteroidetes	Brumimicrobium	135	126	202	83	103	83	49	45	808	770	254	113	124	96	72	68	90	56	62	117	74	38	78	72	124	136	83	65	97	52	55	92	65	88	145	243	292	157	340	163	405	236	129	288	263	546
Bacteria	Bacteria	Proteobacteria	Gulbenkiania	135	230	321	295	179	143	160	113	236	249	232	140	102	232	158	131	176	170	192	147	129	138	188	177	244	489	135	88	105	189	150	188	141	183	186	261	299	123	239	110	263	255	145	197	253	341
Bacteria	Bacteria	Proteobacteria	Hafnia	135	125	250	170	169	134	130	181	162	162	299	197	202	125	180	159	158	201	225	106	108	82	154	149	165	183	89	128	186	137	346	101	131	142	120	207	145	169	195	125	228	242	170	177	161	275
Bacteria	Bacteria	Proteobacteria	Aquamicrobium	134	188	312	180	192	163	137	215	192	165	149	233	97	190	142	131	129	177	164	181	141	161	131	131	147	231	127	163	134	174	159	153	200	202	135	131	153	161	159	91	220	211	163	181	167	233
Bacteria	Bacteria	Firmicutes	Gracilibacillus	134	87	104	124	145	157	111	130	117	156	110	235	47	75	77	152	130	214	112	85	95	71	137	132	151	189	89	95	79	106	95	76	99	111	93	144	162	137	158	92	204	228	247	140	124	155
Bacteria	Bacteria	Spirochaetes	Marispirochaeta	134	142	195	210	197	158	176	178	115	111	83	216	40	128	126	251	140	238	195	99	101	72	131	169	193	316	135	165	112	149	128	118	114	120	130	185	224	510	208	147	215	383	193	184	183	346
Bacteria	Bacteria	Actinobacteria	Miniimonas	134	65	100	48	51	67	60	144	74	74	58	143	41	59	54	76	63	99	111	63	88	108	57	61	59	102	53	59	34	106	111	121	130	78	108	81	134	87	173	76	135	89	84	158	112	103
Bacteria	Bacteria	Proteobacteria	Marinibacterium	133	143	209	152	137	128	159	387	229	190	131	283	57	168	130	74	81	142	118	180	199	248	112	133	127	128	187	127	203	299	228	229	290	199	248	103	105	45	126	70	152	145	166	115	70	141
Bacteria	Bacteria	Bacteroidetes	Pricia	133	58	147	80	99	53	36	87	126	104	103	64	21	50	55	46	48	49	56	59	65	57	58	52	91	98	93	50	75	89	84	88	61	90	72	45	65	60	55	49	65	38	43	48	37	65
Bacteria	Bacteria	Proteobacteria	Bilophila	132	155	174	102	129	100	165	182	212	238	129	194	46	160	98	70	99	158	144	145	85	112	89	141	139	160	78	87	180	149	188	163	152	123	180	147	292	181	245	167	307	265	213	279	205	276
Bacteria	Bacteria	Proteobacteria	Brachymonas	132	152	223	124	127	88	100	154	192	145	122	172	54	176	92	81	65	128	90	97	84	143	96	100	149	183	79	85	70	109	122	92	104	100	133	78	132	49	138	59	168	144	60	129	116	135
Bacteria	Bacteria	Proteobacteria	Crenobacter	132	213	302	220	192	113	154	164	191	158	187	177	48	242	138	107	115	133	120	150	92	131	122	149	138	193	77	97	115	159	120	142	108	180	184	153	216	164	184	94	215	165	129	146	173	204
Bacteria	Bacteria	Actinobacteria	Mobilicoccus	132	109	179	104	90	180	172	320	72	76	84	431	68	145	177	191	147	395	206	124	148	245	144	154	139	232	105	188	96	165	261	142	376	121	160	39	84	95	108	82	94	110	82	84	65	72
Bacteria	Bacteria	Proteobacteria	Marinosulfonomonas	131	95	150	91	83	60	53	93	116	123	74	83	28	48	63	39	115	53	121	50	36	56	50	83	123	138	47	45	40	66	58	53	64	72	82	115	118	69	95	42	161	88	51	83	92	123
Bacteria	Bacteria	Cyanobacteria	Mastigocladopsis	131	184	189	136	103	142	121	131	48	72	103	167	20	192	101	80	126	145	152	113	121	116	123	134	166	209	136	86	115	117	166	152	145	131	134	224	243	103	219	75	246	220	118	209	169	387
Bacteria	Bacteria	Proteobacteria	Thiohalorhabdus	131	143	197	120	141	110	96	94	423	311	190	169	88	132	110	149	132	181	147	130	110	82	127	96	129	200	133	104	130	92	115	130	102	117	119	213	241	176	234	161	309	269	320	202	181	269
Archaea	Bacteria	Euryarchaeota	Natrialba	131	123	163	173	156	125	159	158	83	91	96	197	37	104	122	166	180	191	249	84	70	93	126	143	162	228	94	139	69	105	115	104	123	118	207	161	189	158	150	73	168	137	84	168	112	171
Bacteria	Bacteria	Firmicutes	Acetonema	130	169	202	206	180	252	141	128	60	109	88	294	61	101	131	239	207	292	258	124	132	93	217	156	172	328	127	187	141	161	220	125	132	150	110	108	160	175	132	78	196	200	128	151	104	146
Bacteria	Bacteria	Firmicutes	Thermoflavimicrobium	130	59	101	81	70	106	92	88	37	99	81	127	38	68	73	96	84	125	100	62	55	84	86	82	115	87	92	108	76	77	87	86	98	89	121	145	170	127	172	61	167	144	138	140	156	243
Bacteria	Bacteria	Proteobacteria	Amaricoccus	129	81	179	69	107	77	79	176	431	166	142	218	80	132	87	96	117	128	91	119	98	127	91	85	112	114	146	96	100	124	104	131	156	147	112	88	150	69	97	96	104	143	59	66	84	125
Bacteria	Bacteria	Actinobacteria	Compostimonas	129	123	192	171	152	249	225	286	85	103	92	481	97	176	177	253	195	416	312	140	197	324	244	225	202	315	146	236	138	175	419	176	431	184	171	64	109	120	94	55	116	174	139	114	90	84
Bacteria	Bacteria	Synergistetes	Acetomicrobium	128	146	210	230	262	205	204	119	119	189	122	320	73	114	157	259	124	277	220	81	44	85	204	220	171	251	121	186	125	121	183	100	80	171	97	430	280	162	222	118	363	202	126	236	215	338
Bacteria	Bacteria	Firmicutes	Anaerobacillus	128	127	168	176	120	153	131	141	149	125	107	199	37	148	137	143	131	167	182	164	119	119	165	126	201	300	129	122	144	135	141	133	131	171	141	117	212	124	160	73	221	188	183	141	122	216
Bacteria	Bacteria	Proteobacteria	Chitiniphilus	128	124	164	114	72	67	44	75	84	168	268	70	16	111	101	22	69	54	139	69	64	61	76	78	131	168	70	52	64	57	105	78	95	74	105	174	174	143	216	165	201	219	180	157	193	363
Bacteria	Bacteria	Proteobacteria	Dasania	128	110	267	107	162	87	92	117	135	249	2054	175	279	88	148	145	86	186	140	103	67	77	100	167	168	178	68	73	128	107	1563	104	93	156	158	617	230	310	459	584	638	178	292	406	1001	2862
Bacteria	Bacteria	Proteobacteria	Gallibacterium	128	100	145	109	86	53	56	86	107	99	130	98	18	85	69	56	58	51	76	128	135	140	70	76	132	118	69	70	111	127	105	115	137	98	247	113	144	151	143	72	198	155	85	100	84	178
Bacteria	Bacteria	Proteobacteria	Ahrensia	127	174	241	119	123	86	106	234	111	129	134	151	62	250	136	79	83	119	136	169	135	174	108	152	153	130	81	91	170	145	104	151	161	109	187	111	121	82	154	70	214	157	94	91	81	161
Bacteria	Bacteria	Proteobacteria	Novispirillum	127	77	217	158	183	89	113	219	121	115	60	298	96	102	125	130	146	126	153	107	87	94	92	145	177	244	63	110	134	124	141	107	130	162	67	47	96	86	111	56	105	103	160	84	89	122
Bacteria	Bacteria	Bacteroidetes	Williamwhitmania	127	119	161	23	75	32	10	58	203	126	109	59	24	91	36	27	24	23	28	128	113	129	18	39	70	43	52	34	53	88	27	115	114	67	291	150	249	89	246	109	258	130	74	183	142	376
Bacteria	Bacteria	Proteobacteria	Desulfuromusa	125	148	148	108	101	72	96	87	188	138	119	133	38	145	80	77	75	75	101	133	90	75	75	97	127	169	120	86	89	119	135	128	125	157	138	330	279	156	254	144	338	223	124	247	221	329
Bacteria	Bacteria	Proteobacteria	Gallaecimonas	125	123	186	187	172	73	131	135	180	176	218	208	157	164	133	137	98	149	164	172	105	94	126	152	164	146	113	126	146	154	108	131	92	119	123	205	188	91	175	104	197	169	131	184	199	320
Bacteria	Bacteria	Firmicutes	Sporolactobacillus	125	102	131	137	109	185	171	158	292	124	82	323	56	72	187	205	168	279	237	94	98	121	189	195	159	230	100	140	153	117	246	103	212	139	65	107	136	89	135	54	153	124	120	143	83	169
Bacteria	Bacteria	Bacteroidetes	Lunatimonas	124	142	112	92	84	43	45	44	308	191	206	52	11	84	88	28	44	38	65	86	35	51	44	63	112	108	70	52	42	71	57	63	92	61	117	150	149	104	113	79	138	70	54	159	109	162
Bacteria	Bacteria	Proteobacteria	Marinicella	124	251	295	150	191	57	66	93	205	244	196	92	53	170	80	47	94	104	115	153	98	111	105	106	124	169	104	57	91	139	87	195	117	142	208	322	435	260	401	189	436	313	192	307	319	571
Bacteria	Bacteria	Proteobacteria	Poseidonocella	124	132	210	119	97	105	116	240	162	187	88	159	46	150	94	37	80	69	116	159	115	156	130	138	133	166	92	104	147	178	137	135	140	82	147	83	123	78	78	57	111	102	52	93	83	96
Bacteria	Bacteria	Bacteroidetes	Pseudosphingobacterium	124	44	118	52	164	54	29	73	295	181	147	124	95	52	116	38	46	73	38	55	46	35	34	100	105	83	39	58	47	45	20	46	51	66	38	64	94	34	83	43	80	109	71	51	63	69
Bacteria	Bacteria	Actinobacteria	Humibacter	123	43	196	108	76	175	135	230	49	39	30	270	61	63	103	129	132	254	104	80	84	169	105	133	141	112	70	91	63	93	180	109	227	127	108	14	40	32	53	42	45	159	160	45	32	42
Bacteria	Bacteria	Bacteroidetes	Thermoflavifilum	123	63	112	52	202	77	30	85	50	108	82	102	64	57	116	79	79	86	60	84	54	55	37	87	153	138	108	52	71	84	59	73	68	102	69	44	33	35	44	32	41	184	74	34	47	57
Bacteria	Bacteria	Proteobacteria	Aliihoeflea	122	153	284	123	122	72	73	163	119	117	164	133	38	158	101	94	99	135	122	109	250	127	87	138	181	172	138	106	137	128	107	131	132	99	128	223	208	127	210	100	222	201	129	177	169	222
Bacteria	Bacteria	Proteobacteria	Palleronia	122	86	126	118	149	57	115	109	99	56	46	126	36	97	64	58	100	83	104	73	72	82	83	130	130	99	70	64	79	70	84	65	67	32	61	80	61	33	81	46	72	78	54	91	52	113
Bacteria	Bacteria	Proteobacteria	Porticoccus	122	156	271	127	133	125	93	93	236	204	709	119	57	162	135	107	86	152	85	105	96	72	123	121	159	154	115	89	158	97	194	122	89	119	141	282	233	167	278	190	287	221	142	173	297	677
Bacteria	Bacteria	Proteobacteria	Sodalis	122	45	66	50	87	60	34	65	57	57	46	66	86	30	45	83	33	40	34	29	60	34	46	53	67	65	43	47	66	45	83	40	35	38	39	22	39	38	41	21	55	33	28	56	32	60
Bacteria	Bacteria	Proteobacteria	Amantichitinum	121	148	274	166	269	164	94	170	181	162	297	243	728	113	274	172	166	287	135	90	58	85	124	192	208	224	102	153	137	121	161	95	79	166	98	92	106	80	120	72	126	157	208	92	209	263
Bacteria	Bacteria	Bacteroidetes	Anditalea	121	76	135	33	43	25	10	51	250	178	323	41	34	32	45	10	18	35	21	74	34	57	24	17	70	62	35	65	29	48	30	39	24	50	73	131	120	50	93	74	121	94	143	49	82	184
Bacteria	Bacteria	Proteobacteria	Candidatus Berkiella	121	118	178	81	93	78	77	124	86	56	53	97	108	92	101	37	80	65	113	88	63	58	84	100	134	116	84	61	103	102	87	179	97	86	115	133	177	149	207	149	186	192	144	159	197	387
Archaea	Bacteria	Euryarchaeota	Natrinema	121	148	155	155	192	145	137	115	73	117	95	202	56	129	114	198	157	177	222	131	133	125	157	168	110	247	161	137	101	141	218	140	152	170	249	178	283	191	211	108	252	221	154	252	191	253
Bacteria	Bacteria	Firmicutes	Thermacetogenium	119	156	187	186	229	188	134	125	97	181	70	248	27	130	149	243	164	229	285	135	133	101	175	184	213	334	169	160	127	118	203	145	163	176	115	233	311	191	239	119	264	231	140	292	162	238
Bacteria	Bacteria	Proteobacteria	Bowmanella	118	128	210	124	78	57	24	66	113	133	115	93	55	150	76	45	70	80	117	118	88	135	96	81	159	138	146	66	144	176	54	166	57	126	110	216	125	129	115	107	217	141	180	190	157	287
Bacteria	Bacteria	Firmicutes	Kroppenstedtia	118	257	234	232	239	303	234	114	139	135	136	267	34	179	163	232	151	244	291	150	122	140	212	195	250	324	171	189	158	168	192	192	164	177	246	247	431	471	456	317	493	415	294	417	344	739
Bacteria	Bacteria	Proteobacteria	Thiohalospira	118	81	132	95	73	85	69	103	104	103	113	138	47	127	135	60	100	141	100	92	78	79	90	143	138	140	75	81	89	107	102	59	68	95	116	147	166	134	135	60	172	157	96	138	114	213
Bacteria	Bacteria	Firmicutes	Dialister	117	91	135	116	95	85	78	86	53	86	92	163	86	72	87	83	97	148	100	81	70	64	76	100	122	120	77	68	84	94	96	64	92	102	65	101	104	121	147	65	172	134	46	119	123	193
Bacteria	Bacteria	Actinobacteria	Gordonibacter	117	62	250	77	89	67	90	69	30	55	85	95	8	57	73	55	42	109	112	47	64	60	109	82	98	121	62	97	68	84	76	72	66	51	112	148	143	88	97	65	139	154	73	144	104	164
Bacteria	Bacteria	Bacteroidetes	Robiginitalea	117	113	166	67	101	75	80	92	161	145	113	120	36	69	81	83	95	90	130	89	63	62	93	103	106	150	108	74	51	61	97	95	76	134	101	180	174	119	157	94	209	160	67	138	136	216
Bacteria	Bacteria	Actinobacteria	Spirillospora	117	78	187	161	136	180	232	295	43	34	35	363	51	95	175	291	223	311	277	83	131	246	197	199	222	238	189	160	153	142	442	108	269	144	61	15	35	38	47	30	52	117	113	40	45	34
Bacteria	Bacteria	Firmicutes	Terribacillus	117	119	206	160	158	160	120	225	227	185	105	261	33	144	159	161	97	249	187	120	114	145	142	149	145	261	149	147	100	137	151	153	179	106	142	203	213	164	192	92	201	210	134	196	151	257
Bacteria	Bacteria	Deinococcus-Thermus	Truepera	117	95	127	127	161	113	98	142	96	71	90	191	47	75	119	117	94	185	145	78	81	88	106	120	126	186	49	96	76	78	126	95	116	99	131	190	216	128	143	101	213	151	87	269	147	208
Bacteria	Bacteria	Proteobacteria	Commensalibacter	116	119	348	435	385	303	412	302	100	82	81	525	580	104	401	245	288	415	142	122	131	138	201	384	307	311	131	284	233	216	332	152	204	268	121	87	58	92	90	88	147	157	176	109	100	142
Bacteria	Bacteria	Thermotogae	Petrotoga	116	100	154	153	87	95	110	81	81	126	95	156	40	109	100	123	102	147	132	127	86	77	138	115	169	198	116	115	83	118	143	143	83	79	74	196	204	143	209	139	251	173	251	155	198	306
Bacteria	Bacteria	Proteobacteria	Rhodobaca	116	48	118	61	83	56	51	143	26	36	46	88	69	61	83	22	83	54	157	48	65	70	63	115	105	119	47	37	63	61	81	58	83	61	42	48	22	22	22	16	43	15	12	19	23	33
Bacteria	Bacteria	Firmicutes	Acetobacterium	114	106	133	109	128	58	61	106	170	160	111	139	32	96	106	70	93	100	101	119	86	85	90	96	136	133	91	95	109	142	97	110	101	75	143	154	199	73	226	103	174	185	66	171	135	206
Bacteria	Bacteria	Proteobacteria	Sulfuricurvum	114	107	143	76	117	50	58	80	210	124	241	114	230	76	136	62	96	87	89	62	53	46	37	89	133	151	70	62	96	109	67	62	49	88	114	112	132	68	106	69	136	134	81	143	116	162
Bacteria	Bacteria	Bacteroidetes	Aureitalea	112	111	119	104	96	90	58	68	142	95	71	119	32	74	99	71	84	77	112	111	73	40	76	73	94	165	87	62	65	99	52	80	72	118	85	241	225	93	196	65	249	146	49	156	159	231
Bacteria	Bacteria	Verrucomicrobia	Candidatus Xiphinematobacter	112	141	143	153	106	164	219	494	65	59	56	302	91	209	150	90	115	118	117	210	194	213	80	163	156	138	162	87	140	324	368	306	515	270	154	160	166	127	133	82	145	171	49	133	83	189
Bacteria	Bacteria	Proteobacteria	Desulfotalea	112	157	183	99	145	85	69	132	846	287	181	184	35	129	117	103	106	130	118	128	64	98	85	105	139	173	111	108	119	144	121	118	86	112	118	160	275	114	258	105	283	257	91	227	196	287
Bacteria	Bacteria	Thermotogae	Fervidobacterium	112	96	132	102	105	113	76	68	39	56	57	88	21	113	51	68	74	145	124	126	127	84	106	38	113	120	147	97	212	123	63	159	77	87	104	219	274	239	237	150	300	119	202	229	194	425
Bacteria	Bacteria	Firmicutes	Mitsuokella	112	155	147	102	160	117	93	93	65	94	77	195	32	99	88	143	73	157	151	134	111	152	124	101	135	255	95	105	92	129	91	153	97	127	250	224	197	183	224	220	301	231	116	212	150	271
Bacteria	Bacteria	Proteobacteria	Rubritepida	112	165	266	168	193	137	173	358	217	206	198	313	73	229	140	132	129	199	146	204	146	175	78	161	137	197	138	161	130	197	215	265	283	242	237	160	191	115	160	78	168	192	112	166	175	251
Bacteria	Bacteria	Proteobacteria	Paludibacterium	111	91	123	91	132	122	98	127	139	80	46	142	226	60	119	91	93	139	141	82	75	86	100	129	121	123	128	65	101	92	125	72	44	147	47	38	37	44	32	51	45	105	105	64	74	59
Bacteria	Bacteria	Bacteroidetes	Proteiniphilum	111	103	145	82	123	57	70	106	211	214	198	155	43	110	100	119	87	125	80	103	59	78	100	109	123	110	73	76	93	65	92	82	79	59	108	251	315	128	285	131	329	305	135	207	199	388
Bacteria	Bacteria	Firmicutes	Coprococcus	110	98	123	101	134	103	91	94	159	150	179	155	37	98	105	89	92	158	96	82	87	67	99	127	115	127	100	94	82	104	153	97	98	77	139	210	227	127	232	135	239	178	99	177	188	235
Bacteria	Bacteria	Firmicutes	Laceyella	110	93	141	209	118	122	208	160	52	92	67	222	29	114	118	183	183	211	237	93	69	83	178	208	186	244	137	123	88	107	181	89	138	95	57	68	93	113	175	58	307	154	139	107	100	100
Bacteria	Bacteria	Firmicutes	Leuconostoc	110	70	153	101	109	57	65	96	195	215	136	114	71	91	107	80	75	80	95	100	91	126	60	58	101	125	77	64	143	70	85	84	66	88	102	134	137	107	214	98	182	133	171	149	121	226
Bacteria	Bacteria	Cyanobacteria	Myxosarcina	110	104	94	135	113	131	110	97	117	111	96	186	50	91	82	230	96	178	113	123	116	100	146	106	126	216	104	142	78	89	103	135	96	150	137	165	142	58	123	85	152	171	81	153	113	177
Bacteria	Bacteria	Firmicutes	Parasporobacterium	110	38	232	46	20	5	17	32	29	39	22	7	8	40	13	4	22	23	30	23	32	25	8	16	43	42	30	4	45	57	16	45	26	53	27	24	20	5	6	12	6	20	3	17	3	13
Archaea	Bacteria	Euryarchaeota	Methanomassiliicoccus	110	142	522	1841	658	687	1593	200	77	70	109	784	33	191	501	859	1075	631	1384	208	396	106	514	1252	686	767	174	314	54	368	759	108	40	76	14	322	1018	5173	1071	1481	1601	608	167	720	614	748
Bacteria	Bacteria	Proteobacteria	Ewingella	109	89	150	106	146	103	123	150	104	62	34	129	31	61	113	83	99	114	204	99	113	67	99	124	174	178	102	64	89	92	221	66	108	109	23	29	43	45	56	41	58	46	40	36	49	79
Bacteria	Bacteria	Actinobacteria	Millisia	109	118	215	184	174	241	155	171	95	112	174	263	61	137	148	164	163	267	240	109	120	191	248	171	198	200	122	176	101	129	188	125	162	104	110	72	85	105	126	67	119	92	105	140	116	87
Bacteria	Bacteria	Proteobacteria	Motiliproteus	109	130	186	134	123	97	75	105	121	139	215	151	98	163	122	88	74	99	121	124	86	106	99	112	135	168	112	114	112	121	328	112	110	97	136	366	263	136	225	140	320	249	159	210	209	331
Bacteria	Bacteria	Actinobacteria	Paenarthrobacter	109	132	195	83	122	117	102	132	179	211	139	237	56	112	117	128	93	165	126	109	83	140	106	137	147	205	88	173	99	88	150	88	130	97	111	101	140	110	102	80	188	152	164	138	97	137
Bacteria	Bacteria	Proteobacteria	Pseudoduganella	109	153	124	103	86	77	60	70	223	171	115	100	240	106	112	62	77	146	81	51	33	47	55	95	107	68	37	120	56	70	75	48	72	73	126	111	132	146	211	118	250	201	197	144	128	271
Bacteria	Bacteria	Firmicutes	Saccharibacillus	109	91	122	137	97	132	110	104	240	182	74	125	37	81	78	78	80	149	105	63	81	78	90	77	86	159	76	79	62	77	123	94	69	67	103	165	261	118	201	109	219	181	99	209	162	308
Bacteria	Bacteria	Proteobacteria	Desulfovermiculus	108	76	136	75	97	85	61	112	68	62	72	129	34	107	81	48	89	121	164	76	82	88	90	86	134	191	58	50	98	87	105	88	119	104	107	80	188	97	146	92	186	107	53	125	84	174
Bacteria	Bacteria	Chloroflexi	Flexilinea	108	140	196	172	170	191	148	142	119	113	79	334	53	114	181	197	166	266	201	89	103	90	163	167	206	182	95	141	124	143	199	149	152	119	145	367	643	402	770	452	868	597	207	577	539	1024
Bacteria	Bacteria	Proteobacteria	Pelagibaca	108	138	141	76	58	100	70	106	127	120	129	104	36	103	68	79	88	78	83	70	75	82	47	70	84	162	94	61	104	88	217	86	132	82	70	67	63	48	92	26	101	91	45	77	70	85
Bacteria	Bacteria	Actinobacteria	Segniliparus	108	11	108	72	33	13	50	103	79	109	69	78	5	31	30	35	44	58	61	26	40	35	41	38	63	36	50	51	42	68	49	33	74	36	126	213	135	31	69	35	129	87	46	34	16	77
Bacteria	Bacteria	Proteobacteria	Thalassobacter	108	96	106	128	92	103	99	123	186	328	79	121	33	121	122	84	87	131	133	101	88	85	83	122	73	183	181	95	151	116	207	139	133	168	87	78	110	101	130	68	125	111	110	120	125	212
Archaea	Bacteria	Euryarchaeota	Methanoregula	108	148	273	304	241	306	237	205	45	144	94	393	56	137	227	309	229	362	317	123	167	193	206	292	250	271	178	243	170	159	287	107	172	138	74	83	164	236	163	113	162	166	123	149	156	161
Archaea	Bacteria	Euryarchaeota	Methanofollis	107	93	156	214	151	204	178	118	50	90	62	157	28	88	114	115	149	190	232	69	74	110	145	127	207	193	100	119	71	89	128	112	94	87	72	66	87	232	144	75	177	125	100	124	72	125
Bacteria	Bacteria	Proteobacteria	Aggregatibacter	106	84	185	130	120	81	94	103	139	113	114	108	60	78	103	61	70	109	152	46	40	31	82	102	118	132	67	75	67	72	107	71	65	102	98	96	119	59	119	66	196	73	96	107	112	163
Bacteria	Bacteria	Firmicutes	Anaerocolumna	106	58	94	95	113	47	64	67	122	117	149	100	39	41	81	61	66	86	109	87	60	61	79	104	98	98	107	43	77	91	55	87	88	72	107	109	143	91	142	42	144	107	58	103	66	134
Bacteria	Bacteria	Actinobacteria	Nesterenkonia	106	49	129	88	98	141	152	161	119	115	68	237	55	82	138	130	123	248	171	105	79	128	102	118	139	125	98	98	106	137	126	114	218	107	126	99	124	93	110	37	99	108	88	105	91	119
Bacteria	Bacteria	Proteobacteria	Perlucidibaca	106	103	138	82	94	58	44	94	133	132	173	87	85	146	60	39	61	74	101	109	71	67	114	47	73	71	73	35	99	114	130	86	99	109	118	170	183	103	234	140	259	131	174	161	201	367
Bacteria	Bacteria	Bacteroidetes	Psychroserpens	106	92	121	79	115	83	35	66	142	212	119	97	50	82	85	52	53	83	58	55	56	34	68	81	77	97	40	48	81	76	99	98	50	68	146	120	123	77	122	65	167	110	156	124	95	274
Bacteria	Bacteria	Bacteroidetes	Saprospira	106	84	136	66	118	59	73	83	181	175	144	78	31	51	89	55	82	86	134	57	70	62	47	83	134	153	53	65	67	61	53	94	86	83	63	132	211	96	129	54	117	177	108	112	119	206
Bacteria	Bacteria	Spirochaetes	Brachyspira	105	78	143	122	138	114	88	111	84	96	158	149	24	102	88	96	115	178	195	114	97	129	65	96	156	156	97	125	103	111	97	116	96	112	110	261	317	162	260	150	310	182	116	223	180	277
Bacteria	Bacteria	Proteobacteria	Candidatus Thioglobus	105	107	214	113	99	103	88	116	190	120	111	129	61	152	93	90	112	156	182	95	77	107	75	124	130	147	80	48	303	115	129	119	106	126	98	187	194	151	176	114	218	219	115	137	154	253
Bacteria	Bacteria	Actinobacteria	Dermatophilus	105	69	91	56	66	99	63	110	67	82	75	148	40	50	71	89	73	102	108	41	54	65	90	59	97	84	53	111	48	70	76	60	95	94	126	47	84	63	72	19	45	52	66	66	40	58
Bacteria	Bacteria	Bacteroidetes	Gelidibacter	105	90	129	54	123	42	23	72	148	145	215	45	19	73	48	43	61	73	42	68	35	56	35	72	81	63	37	38	40	56	40	48	34	46	141	77	132	61	119	61	133	73	41	70	86	134
Bacteria	Bacteria	Proteobacteria	Haematospirillum	105	141	225	135	158	103	160	280	108	133	86	358	83	147	106	100	134	121	117	93	89	89	111	227	129	172	68	88	146	134	183	151	212	111	98	106	153	65	88	76	133	132	90	121	87	138
Bacteria	Bacteria	Proteobacteria	Oricola	105	114	150	101	164	64	82	98	51	77	91	228	84	86	114	159	59	190	129	79	87	115	173	109	133	150	64	111	76	133	81	78	83	91	64	44	47	42	71	42	86	121	97	50	59	122
Bacteria	Bacteria	Proteobacteria	Parasphingopyxis	105	109	295	178	187	65	87	128	245	190	147	233	211	117	230	111	142	201	145	90	88	88	167	150	213	175	96	115	327	104	132	84	75	113	80	140	117	102	150	137	216	166	212	120	168	170
Bacteria	Bacteria	Aquificae	Persephonella	105	95	103	103	157	109	84	81	113	116	248	141	40	98	74	131	88	137	109	134	143	77	91	73	136	161	74	109	47	110	109	117	75	128	103	177	354	227	271	172	381	329	159	258	258	437
Bacteria	Bacteria	Proteobacteria	Pseudorhizobium	105	113	172	299	121	78	141	188	251	215	148	199	173	121	172	404	94	155	221	115	104	116	146	142	145	128	81	129	150	124	84	115	100	77	129	120	138	65	127	58	164	91	99	143	91	188
Bacteria	Bacteria	Cyanobacteria	Halothece	104	72	103	80	85	157	126	115	39	49	46	138	76	69	132	174	108	109	161	52	66	62	152	154	170	208	119	120	113	56	243	97	85	65	56	92	57	38	61	28	102	119	51	49	52	102
Bacteria	Bacteria	Firmicutes	Paeniclostridium	104	79	82	91	77	75	75	67	61	63	84	132	71	76	89	86	99	75	133	97	66	83	80	88	158	111	106	60	72	75	90	146	73	98	202	143	207	126	199	108	276	136	70	176	114	208
Bacteria	Bacteria	Proteobacteria	Zhongshania	104	108	156	66	94	61	41	79	197	171	381	99	40	86	68	32	52	77	74	76	48	36	56	62	122	77	41	52	93	100	274	71	85	71	178	359	253	112	209	152	360	180	160	227	274	737
Archaea	Bacteria	Euryarchaeota	Halogeometricum	104	80	133	139	134	134	126	102	67	64	56	227	20	126	80	151	123	181	161	89	76	77	124	151	130	172	109	114	69	84	143	71	103	85	124	96	255	186	159	87	195	113	69	191	78	213
Bacteria	Bacteria	Candidatus Omnitrophica	Candidatus Omnitrophus	103	78	108	77	78	59	86	99	120	100	91	67	41	92	77	21	77	30	62	81	50	79	43	63	76	96	76	36	96	65	134	73	95	60	100	122	148	98	138	67	169	139	46	110	87	164
Bacteria	Bacteria	Proteobacteria	Rubrimonas	103	150	196	127	106	117	116	234	205	178	206	187	52	161	98	85	94	109	119	127	152	165	94	62	133	152	140	82	111	176	160	150	190	97	170	123	118	101	110	52	138	160	84	108	67	131
Bacteria	Bacteria	Cyanobacteria	Snowella	103	121	169	148	114	120	135	82	46	89	109	165	21	124	133	120	149	156	143	87	48	124	123	146	183	221	85	119	154	84	84	74	96	117	71	146	156	206	136	133	186	172	162	116	92	181
Bacteria	Bacteria	Chlamydiae	Waddlia	103	73	160	97	50	160	179	478	55	70	123	246	89	145	79	36	127	63	109	211	176	237	61	174	123	117	91	35	149	381	403	333	664	286	143	43	97	41	101	58	146	67	24	81	74	216
Archaea	Bacteria	Euryarchaeota	Halobellus	103	71	145	136	96	126	117	114	180	122	72	150	20	80	67	120	138	168	177	81	53	79	143	123	111	190	44	111	229	61	148	66	66	76	93	98	170	154	113	85	225	85	68	161	74	137
Bacteria	Bacteria	Aquificae	Hydrogenobacter	102	95	102	73	114	44	59	61	105	119	114	81	18	80	60	49	85	58	84	71	47	35	80	53	81	108	104	62	74	75	58	116	62	91	99	117	155	115	162	106	246	207	91	160	140	211
Bacteria	Bacteria	Proteobacteria	Polycyclovorans	102	102	98	80	104	93	70	132	186	227	126	101	65	92	103	88	63	76	76	85	68	54	78	79	99	90	42	57	104	87	71	84	59	86	104	370	375	132	318	179	507	209	249	311	256	528
Bacteria	Bacteria	Proteobacteria	Wohlfahrtiimonas	102	31	97	50	82	60	30	73	98	80	70	77	79	53	56	123	77	105	57	33	32	25	41	76	105	77	23	57	62	40	39	31	44	53	34	28	28	41	65	39	70	47	74	34	42	54
Archaea	Bacteria	Euryarchaeota	Halopiger	102	120	156	123	129	112	123	115	118	130	93	193	16	100	112	134	123	129	186	87	56	100	123	103	113	178	89	146	105	142	250	122	91	104	90	151	126	198	122	74	200	155	102	118	110	174
Bacteria	Bacteria	Bacteroidetes	Alkaliflexus	101	66	72	47	74	27	26	43	57	76	62	56	156	89	57	17	37	51	41	53	43	35	26	49	57	42	37	27	51	23	42	56	27	29	110	76	147	57	101	48	102	60	44	95	92	155
Bacteria	Bacteria	Firmicutes	Anaerostipes	101	42	100	66	78	47	55	80	41	55	96	71	31	48	63	46	53	59	67	104	90	162	95	54	89	115	46	44	76	131	69	50	42	84	142	47	88	89	109	86	151	160	132	103	66	141
Bacteria	Bacteria	Proteobacteria	Candidatus Marithrix	101	150	150	143	124	104	109	140	126	136	164	194	146	169	129	76	77	148	118	124	101	102	116	95	120	154	125	130	95	146	186	198	86	129	149	267	620	126	414	190	563	233	102	405	350	606
Bacteria	Bacteria	Cyanobacteria	Chlorogloea	101	124	176	144	142	90	103	107	164	177	153	111	43	109	71	68	90	89	162	100	98	135	88	95	136	187	106	75	53	84	70	93	90	75	79	159	126	147	174	80	263	221	451	167	175	336
Bacteria	Bacteria	Bacteroidetes	Olleya	101	95	119	83	79	56	72	83	251	303	159	76	54	61	81	38	58	57	66	82	43	66	55	75	91	99	57	42	42	63	37	75	57	57	136	136	178	160	170	87	254	182	92	149	149	369
Bacteria	Bacteria	Firmicutes	Pueribacillus	101	32	98	54	62	55	198	114	488	238	504	131	26	41	72	122	92	123	85	55	85	68	73	95	98	140	35	46	99	49	139	101	48	84	154	72	33	35	76	59	115	97	107	46	50	79
Bacteria	Bacteria	Actinobacteria	Kytococcus	100	67	122	87	75	52	88	134	65	73	95	125	18	109	63	104	82	156	124	56	51	114	77	73	93	85	67	112	47	109	102	91	164	89	163	107	190	97	137	64	107	110	94	142	64	150
Bacteria	Bacteria	Proteobacteria	Rickettsia	100	162	237	175	157	90	90	160	322	188	164	203	251	84	102	67	130	234	200	130	97	69	105	188	188	202	101	115	188	101	98	140	127	100	186	81	148	82	200	102	237	189	119	171	169	222
Bacteria	Bacteria	Cyanobacteria	Sphaerospermopsis	100	104	112	79	108	90	123	85	72	93	99	124	52	102	98	65	126	130	122	82	61	74	99	115	128	173	69	77	85	86	114	86	87	71	75	166	131	105	100	45	116	160	123	151	128	174
Archaea	Bacteria	Euryarchaeota	Methanocella	100	99	168	208	129	239	240	100	35	73	63	190	41	90	93	177	171	159	230	88	90	113	157	177	171	290	106	150	96	99	123	87	82	122	51	106	146	319	126	104	180	102	39	156	107	193
Bacteria	Bacteria	Bacteroidetes	Bizionia	99	107	112	59	77	27	23	67	103	177	159	65	22	83	47	20	28	39	49	78	55	42	50	39	59	114	54	54	67	79	19	104	51	71	104	174	175	148	242	94	224	139	90	132	192	233
Bacteria	Bacteria	Firmicutes	Caldalkalibacillus	99	86	126	110	110	137	107	84	21	41	36	181	21	54	110	111	113	199	225	47	47	67	148	111	144	171	119	101	68	72	95	105	73	75	67	189	193	88	129	63	97	126	144	119	56	74
Bacteria	Bacteria	Proteobacteria	Dissulfuribacter	99	105	101	110	125	91	127	96	42	24	46	125	24	74	87	116	87	138	121	84	41	68	91	92	81	119	68	99	80	87	113	115	120	103	90	164	124	90	156	85	173	111	54	95	111	169
Bacteria	Bacteria	Proteobacteria	Mycoplana	99	163	224	138	109	127	66	160	239	192	198	133	130	113	109	95	68	129	100	118	85	120	75	133	132	157	91	99	97	113	140	128	105	135	163	98	108	100	100	78	97	133	142	103	123	182
Bacteria	Bacteria	Proteobacteria	Oceanospirillum	99	192	213	172	149	81	75	178	346	211	412	161	76	148	191	80	84	173	246	128	107	92	168	161	198	187	99	87	143	123	204	139	106	114	161	250	180	143	275	165	320	189	156	199	248	462
Bacteria	Bacteria	Proteobacteria	Sulfurimonas	99	64	69	54	40	30	46	53	213	137	234	67	41	80	41	34	43	43	59	80	36	45	49	54	53	68	27	31	42	108	4	61	31	50	45	146	167	113	161	82	224	98	100	116	106	235
Bacteria	Bacteria	Proteobacteria	Buttiauxella	98	95	150	114	129	78	84	127	130	105	137	194	118	123	132	150	106	161	131	97	99	79	104	110	117	135	79	104	109	115	417	104	93	80	152	126	214	119	161	86	215	225	187	193	164	203
Bacteria	Bacteria	Candidatus Kryptonia	Candidatus Chrysopegis	98	119	165	162	162	128	124	113	75	67	98	286	55	151	143	214	115	281	218	130	95	88	157	139	220	267	128	183	132	159	169	161	136	190	77	408	395	235	375	247	550	269	215	331	351	657
Bacteria	Bacteria	Proteobacteria	Cribrihabitans	98	85	142	97	102	60	80	109	46	61	81	98	41	84	108	47	76	72	81	70	60	91	75	106	113	90	59	68	64	82	45	66	77	64	64	49	45	50	70	36	64	54	43	71	36	91
Bacteria	Bacteria	Bacteroidetes	Candidatus Symbiothrix	97	52	110	65	92	68	48	75	123	71	42	107	14	59	70	70	51	112	101	33	50	37	63	85	107	129	60	126	24	28	40	38	36	37	47	21	28	23	22	24	47	65	42	36	41	72
[truncated: 1,085 more rows]
[truncated: 89 more columns]

## Sheet: Supplementary Table 3-2
Domain	Kingdom	Phyla	Genus	1L01	1L02	1L03	1L04	1L05	1L06	1L07	1L08	1Y01	1Y02	1Y03	2L01B	2L01	2L03	3L01	3L02	3L03	3L04	3L05	3Y01	3Y02	3Y03	4L01	4L02	4L03	4L04	4L05	4L06	4Y01	4Y02	4Y03	5Y01	5Y02	5Y03	5Y04	A01	A02	A03	A04	A05	A06	A07	A08	A09	A10	A11
[truncated: 449 more rows]
[truncated: 89 more columns]

[truncated: 7 more sheets: Supplementary Table 4, Supplementary Table 5-1, Supplementary Table 5-2, Supplementary Table 6-1, Supplementary Table 6-2, Supplementary Table 7-1, Supplementary Table 7-2]
